# Supplementary material for: Plant polymerase IV sensitizes chromatin through histone modifications to preclude spread of silencing into protein-coding domains
Source: HighWire-hosted journal article supplement (doi:10.1101/gr.277353.122), 2023-05-01
Supplement: Supplemental_Table_S6.xlsx [file Supplemental_Table_S6.xlsx]

## Sheet: Sheet1
Supplemental_Table_S6_Bed_co-ordinates_of_polIV_dependent_and_suppressed_sRNA_100bp_bins_in_different_rice_tissues
Panicle						Anther						Endosperm						Seedlings						Panicle (rdr2 dependent bins)						Leaves (nrp(d/e)2 dependent bins)						Panicle						Anther						Endosperm
21-22nt sRNA 100bp bins - downregulated			23-24nt sRNA 100bp bins - downregulated			21-22nt sRNA 100bp bins - downregulated			23-24nt sRNA 100bp bins - downregulated			21-22nt sRNA 100bp bins - downregulated			23-24nt sRNA 100bp bins - downregulated			21-22nt sRNA 100bp bins - downregulated			23-24nt sRNA 100bp bins - downregulated			21-22nt sRNA 100bp bins - downregulated			23-24nt sRNA 100bp bins - downregulated			21-22nt sRNA 100bp bins - downregulated			23-24nt sRNA 100bp bins - downregulated			21-22nt sRNA 100bp bins - upregulated			23-24nt sRNA 100bp bins - upregulated			21-22nt sRNA 100bp bins - upregulated			23-24nt sRNA 100bp bins - upregulated			21-22nt sRNA 100bp bins - upregulated
chr	start	end	chr	start	end	chr	start	end	chr	start	end	chr	start	end	chr	start	end	chr	start	end	chr	start	end	chr	start	end	chr	start	end	chr	start	end	chr	start	end	chr	start	end	chr	start	end	chr	start	end	chr	start	end	chr	start
1	2300	2400	1	2300	2400	1	30600	30700	1	98800	98900	1	53700	53800	1	53700	53800	1	169100	169200	1	56700	56800	1	137400	137500	1	136700	136800	1	308000	308100	1	169100	169200	1	182200	182300	1	144900	145000	1	144900	145000	1	144900	145000	1	140100
1	30600	30700	1	28900	29000	1	56100	56200	1	98900	99000	1	104600	104700	1	53800	53900	1	169200	169300	1	135700	135800	1	138200	138300	1	176800	176900	1	531100	531200	1	298300	298400	1	182300	182400	1	182200	182300	1	182100	182200	1	182100	182200	1	140200
1	56100	56200	1	30600	30700	1	95900	96000	1	99600	99700	1	104700	104800	1	68000	68100	1	259000	259100	1	137300	137400	1	138300	138400	1	184700	184800	1	1194600	1194700	1	299000	299100	1	507900	508000	1	182300	182400	1	216200	216300	1	416000	416100	1	140300
1	56700	56800	1	43400	43500	1	98800	98900	1	104600	104700	1	128000	128100	1	94100	94200	1	260000	260100	1	137400	137500	1	140100	140200	1	197400	197500	1	1222400	1222500	1	299100	299200	1	528800	528900	1	416000	416100	1	216300	216400	1	755200	755300	1	140600
1	104600	104700	1	43500	43600	1	99600	99700	1	104700	104800	1	266900	267000	1	104600	104700	1	283000	283100	1	169100	169200	1	140200	140300	1	244900	245000	1	1222500	1222600	1	300300	300400	1	528900	529000	1	416100	416200	1	507900	508000	1	755300	755400	1	140700
1	104700	104800	1	56100	56200	1	99700	99800	1	118200	118300	1	275700	275800	1	104700	104800	1	300400	300500	1	169200	169300	1	140300	140400	1	260000	260100	1	1300800	1300900	1	300400	300500	1	535200	535300	1	528800	528900	1	755200	755300	1	755400	755500	1	141100
1	128000	128100	1	56700	56800	1	104600	104700	1	120500	120600	1	275800	275900	1	128000	128100	1	397000	397100	1	176800	176900	1	140400	140500	1	272500	272600	1	1300900	1301000	1	497900	498000	1	756600	756700	1	528900	529000	1	755300	755400	1	755500	755600	1	141200
1	133400	133500	1	104600	104700	1	104700	104800	1	121300	121400	1	294300	294400	1	133400	133500	1	400800	400900	1	197400	197500	1	272500	272600	1	283000	283100	1	2279100	2279200	1	533700	533800	1	756800	756900	1	755900	756000	1	755400	755500	1	755600	755700	1	182000
1	135700	135800	1	104700	104800	1	106000	106100	1	122700	122800	1	300400	300500	1	133700	133800	1	497900	498000	1	215600	215700	1	300400	300500	1	299700	299800	1	2906100	2906200	1	575000	575100	1	757000	757100	1	1215100	1215200	1	755500	755600	1	833900	834000	1	182100
1	169100	169200	1	123000	123100	1	106100	106200	1	123000	123100	1	494000	494100	1	137400	137500	1	575800	575900	1	215700	215800	1	497900	498000	1	300300	300400	1	3228500	3228600	1	676400	676500	1	757100	757200	1	1215200	1215300	1	755600	755700	1	884200	884300	1	182300
1	169200	169300	1	124000	124100	1	118200	118300	1	124000	124100	1	494100	494200	1	162700	162800	1	661100	661200	1	232200	232300	1	802100	802200	1	300400	300500	1	3228600	3228700	1	865400	865500	1	757200	757300	1	1703500	1703600	1	1312000	1312100	1	1033800	1033900	1	299300
1	176300	176400	1	124100	124200	1	122000	122100	1	124100	124200	1	494200	494300	1	169100	169200	1	934400	934500	1	244900	245000	1	815200	815300	1	301500	301600	1	3372500	3372600	1	954900	955000	1	1236600	1236700	1	2279000	2279100	1	1312100	1312200	1	1260000	1260100	1	416100
1	177200	177300	1	128000	128100	1	122700	122800	1	126800	126900	1	494300	494400	1	169200	169300	1	954900	955000	1	259000	259100	1	815300	815400	1	494200	494300	1	3373600	3373700	1	1087400	1087500	1	2279100	2279200	1	2279100	2279200	1	1312200	1312300	1	1260200	1260300	1	1204800
1	215200	215300	1	133400	133500	1	123000	123100	1	128000	128100	1	494400	494500	1	245300	245400	1	1087400	1087500	1	260000	260100	1	954900	955000	1	494300	494400	1	3576300	3576400	1	1093600	1093700	1	2391000	2391100	1	2391000	2391100	1	1312300	1312400	1	1260300	1260400	1	1204900
1	232200	232300	1	133700	133800	1	123800	123900	1	129300	129400	1	494500	494600	1	247000	247100	1	1149900	1150000	1	272500	272600	1	1087400	1087500	1	497900	498000	1	4429500	4429600	1	1093700	1093800	1	2620600	2620700	1	2775200	2775300	1	1312400	1312500	1	1263200	1263300	1	1420500
1	238800	238900	1	137400	137500	1	124100	124200	1	129600	129700	1	494600	494700	1	275700	275800	1	1150000	1150100	1	272700	272800	1	1149900	1150000	1	507600	507700	1	4549900	4550000	1	1094400	1094500	1	3735000	3735100	1	3421300	3421400	1	1312500	1312600	1	1263300	1263400	1	1727300
1	259000	259100	1	197400	197500	1	126600	126700	1	133400	133500	1	533600	533700	1	276700	276800	1	1266400	1266500	1	275500	275600	1	1150000	1150100	1	611200	611300	1	4559800	4559900	1	1110900	1111000	1	4570600	4570700	1	3734900	3735000	1	1313800	1313900	1	1312000	1312100	1	1775400
1	260000	260100	1	197500	197600	1	126800	126900	1	137300	137400	1	674500	674600	1	277400	277500	1	1266500	1266600	1	275700	275800	1	1266500	1266600	1	677500	677600	1	5450000	5450100	1	1132100	1132200	1	4570700	4570800	1	3735000	3735100	1	1313900	1314000	1	1312100	1312200	1	1775500
1	266900	267000	1	222900	223000	1	128000	128100	1	137400	137500	1	675000	675100	1	283000	283100	1	1288100	1288200	1	283000	283100	1	1300800	1300900	1	687400	687500	1	5666000	5666100	1	1133700	1133800	1	4666000	4666100	1	4082800	4082900	1	1314000	1314100	1	1312200	1312300	1	2241900
1	269800	269900	1	238400	238500	1	131400	131500	1	246500	246600	1	832600	832700	1	300300	300400	1	1298800	1298900	1	294200	294300	1	1300900	1301000	1	687500	687600	1	5955600	5955700	1	1143200	1143300	1	4666300	4666400	1	4402300	4402400	1	1314100	1314200	1	1312300	1312400	1	2279000
1	272500	272600	1	244900	245000	1	133400	133500	1	259000	259100	1	832700	832800	1	300400	300500	1	1298900	1299000	1	298300	298400	1	1439500	1439600	1	779800	779900	1	6232800	6232900	1	1150000	1150100	1	4666400	4666500	1	5006200	5006300	1	1314200	1314300	1	1312400	1312500	1	2279100
1	273900	274000	1	259000	259100	1	162400	162500	1	260000	260100	1	1063900	1064000	1	325000	325100	1	1300900	1301000	1	299700	299800	1	1442900	1443000	1	815200	815300	1	6571100	6571200	1	1266400	1266500	1	4918600	4918700	1	5006500	5006600	1	1314300	1314400	1	1312500	1312600	1	2391000
1	283000	283100	1	260000	260100	1	162500	162600	1	266900	267000	1	1064000	1064100	1	452600	452700	1	1389600	1389700	1	300300	300400	1	1647300	1647400	1	815300	815400	1	6955600	6955700	1	1266500	1266600	1	4981100	4981200	1	5006600	5006700	1	1775400	1775500	1	1313800	1313900	1	3516600
1	297900	298000	1	266900	267000	1	177200	177300	1	272500	272600	1	1143200	1143300	1	487300	487400	1	1391400	1391500	1	300400	300500	1	1690200	1690300	1	815500	815600	1	7218200	7218300	1	1285000	1285100	1	5005600	5005700	1	5088100	5088200	1	1775500	1775600	1	1313900	1314000	1	3516700
1	298000	298100	1	272500	272600	1	232200	232300	1	282900	283000	1	1279400	1279500	1	493500	493600	1	1442900	1443000	1	317400	317500	1	2274900	2275000	1	905600	905700	1	7218300	7218400	1	1285200	1285300	1	5006500	5006600	1	5478600	5478700	1	2231100	2231200	1	1314000	1314100	1	3734900
1	298800	298900	1	272700	272800	1	259000	259100	1	283000	283100	1	1279500	1279600	1	493800	493900	1	1690200	1690300	1	351500	351600	1	2329500	2329600	1	910400	910500	1	7528100	7528200	1	1300800	1300900	1	5006600	5006700	1	5729700	5729800	1	2239600	2239700	1	1314100	1314200	1	4152800
1	299000	299100	1	282900	283000	1	266900	267000	1	405900	406000	1	1282100	1282200	1	494000	494100	1	1709800	1709900	1	351600	351700	1	2523000	2523100	1	937500	937600	1	7657300	7657400	1	1300900	1301000	1	5478600	5478700	1	5769800	5769900	1	2239700	2239800	1	1314200	1314300	1	4269100
1	299700	299800	1	283000	283100	1	272500	272600	1	452500	452600	1	1282200	1282300	1	494100	494200	1	1709900	1710000	1	396800	396900	1	2523100	2523200	1	954900	955000	1	7657400	7657500	1	1679500	1679600	1	5548800	5548900	1	5805400	5805500	1	2239800	2239900	1	1314300	1314400	1	4269500
1	300300	300400	1	283100	283200	1	297900	298000	1	466000	466100	1	1300400	1300500	1	494200	494300	1	1871700	1871800	1	397000	397100	1	2523200	2523300	1	1032200	1032300	1	7657500	7657600	1	1721900	1722000	1	5551500	5551600	1	6995900	6996000	1	2240000	2240100	1	1469300	1469400	1	4269600
1	300400	300500	1	295600	295700	1	300300	300400	1	466200	466300	1	1389600	1389700	1	494300	494400	1	1875700	1875800	1	397400	397500	1	2523300	2523400	1	1064000	1064100	1	7657900	7658000	1	1840600	1840700	1	5551600	5551700	1	7228800	7228900	1	2240500	2240600	1	1469900	1470000	1	4270100
1	317100	317200	1	297900	298000	1	300400	300500	1	466800	466900	1	1482100	1482200	1	494400	494500	1	1875800	1875900	1	400700	400800	1	2523400	2523500	1	1087400	1087500	1	7658000	7658100	1	1950400	1950500	1	5851700	5851800	1	7228900	7229000	1	2240700	2240800	1	1475400	1475500	1	4397400
1	317200	317300	1	298300	298400	1	301500	301600	1	468200	468300	1	1596200	1596300	1	494500	494600	1	1880700	1880800	1	400800	400900	1	2523500	2523600	1	1109800	1109900	1	8076200	8076300	1	1950500	1950600	1	6097200	6097300	1	7229000	7229100	1	2244100	2244200	1	1476000	1476100	1	4397500
1	335500	335600	1	298400	298500	1	399000	399100	1	469600	469700	1	1596300	1596400	1	507500	507600	1	2258400	2258500	1	400900	401000	1	2523600	2523700	1	1132100	1132200	1	8076300	8076400	1	1999800	1999900	1	6677600	6677700	1	7229100	7229200	1	2244200	2244300	1	1610100	1610200	1	4402300
1	399000	399100	1	298800	298900	1	399100	399200	1	470600	470700	1	1596600	1596700	1	670200	670300	1	2274900	2275000	1	452600	452700	1	2555300	2555400	1	1133700	1133800	1	8530000	8530100	1	2143000	2143100	1	6677700	6677800	1	7434900	7435000	1	2244300	2244400	1	1617400	1617500	1	4980800
1	399100	399200	1	299000	299100	1	466200	466300	1	470700	470800	1	1596700	1596800	1	670300	670400	1	2279000	2279100	1	486700	486800	1	2555500	2555600	1	1142800	1142900	1	8727400	8727500	1	2143200	2143300	1	7228800	7228900	1	7435000	7435100	1	2279000	2279100	1	1742100	1742200	1	4981100
1	431700	431800	1	299700	299800	1	466800	466900	1	470900	471000	1	1597000	1597100	1	670800	670900	1	2383500	2383600	1	497900	498000	1	2555600	2555700	1	1143200	1143300	1	8785700	8785800	1	2258400	2258500	1	7228900	7229000	1	7457400	7457500	1	2279100	2279200	1	2279000	2279100	1	5006500
1	434900	435000	1	300300	300400	1	467000	467100	1	472300	472400	1	1819100	1819200	1	670900	671000	1	2495000	2495100	1	507400	507500	1	2556100	2556200	1	1149900	1150000	1	9716800	9716900	1	2274900	2275000	1	7229000	7229100	1	7762100	7762200	1	2313000	2313100	1	2279100	2279200	1	5006600
1	435000	435100	1	300400	300500	1	467100	467200	1	472400	472500	1	1819200	1819300	1	674500	674600	1	2539900	2540000	1	507600	507700	1	2556300	2556400	1	1150000	1150100	1	9792200	9792300	1	2383500	2383600	1	7229100	7229200	1	7762200	7762300	1	2313100	2313200	1	2329200	2329300	1	5373300
1	452600	452700	1	302700	302800	1	469800	469900	1	473200	473300	1	1819500	1819600	1	675000	675100	1	2711900	2712000	1	508500	508600	1	2556400	2556500	1	1249300	1249400	1	10060100	10060200	1	2429900	2430000	1	7762100	7762200	1	7762700	7762800	1	2313200	2313300	1	2366500	2366600	1	5373400
1	494300	494400	1	347900	348000	1	469900	470000	1	475400	475500	1	1819600	1819700	1	755300	755400	1	2774800	2774900	1	533600	533700	1	2556500	2556600	1	1249400	1249500	1	11666700	11666800	1	2799800	2799900	1	7762200	7762300	1	7764300	7764400	1	2314700	2314800	1	2553200	2553300	1	5385400
1	497900	498000	1	397400	397500	1	470600	470700	1	476300	476400	1	1819700	1819800	1	757800	757900	1	2862300	2862400	1	560500	560600	1	2556600	2556700	1	1288100	1288200	1	11666800	11666900	1	2799900	2800000	1	7764300	7764400	1	7991300	7991400	1	2314800	2314900	1	2990800	2990900	1	5551600
1	507600	507700	1	399000	399100	1	470900	471000	1	477800	477900	1	1819800	1819900	1	802600	802700	1	2902300	2902400	1	560600	560700	1	2556700	2556800	1	1298700	1298800	1	11666900	11667000	1	2896600	2896700	1	7813900	7814000	1	8641800	8641900	1	2314900	2315000	1	3210900	3211000	1	5769800
1	529200	529300	1	405800	405900	1	472400	472500	1	494300	494400	1	1819900	1820000	1	832600	832700	1	2961700	2961800	1	575800	575900	1	2556800	2556900	1	1298900	1299000	1	11667000	11667100	1	2906100	2906200	1	7875800	7875900	1	8729100	8729200	1	2315000	2315100	1	3211500	3211600	1	5769900
1	533500	533600	1	405900	406000	1	473200	473300	1	501300	501400	1	1820000	1820100	1	832700	832800	1	2989500	2989600	1	597300	597400	1	2556900	2557000	1	1300900	1301000	1	11667100	11667200	1	2999800	2999900	1	8729100	8729200	1	8729200	8729300	1	2317300	2317400	1	3263600	3263700	1	5986600
1	533600	533700	1	431700	431800	1	475500	475600	1	661300	661400	1	1820200	1820300	1	971000	971100	1	3007400	3007500	1	609000	609100	1	2557000	2557100	1	1305300	1305400	1	11669000	11669100	1	3141300	3141400	1	8729200	8729300	1	9655600	9655700	1	2317400	2317500	1	3263700	3263800	1	6447500
1	533700	533800	1	433400	433500	1	476300	476400	1	815500	815600	1	1820400	1820500	1	972000	972100	1	3007500	3007600	1	611200	611300	1	2557100	2557200	1	1367200	1367300	1	12946400	12946500	1	3187700	3187800	1	9655600	9655700	1	9659600	9659700	1	2317500	2317600	1	3421300	3421400	1	7228900
1	575000	575100	1	433500	433600	1	497900	498000	1	815600	815700	1	1821000	1821100	1	1039500	1039600	1	3074700	3074800	1	615800	615900	1	2557200	2557300	1	1382400	1382500	1	12946500	12946600	1	3245600	3245700	1	9659600	9659700	1	9660400	9660500	1	2319500	2319600	1	3761000	3761100	1	7229100
1	597200	597300	1	434800	434900	1	533700	533800	1	827400	827500	1	1826800	1826900	1	1087400	1087500	1	3271500	3271600	1	629300	629400	1	2557300	2557400	1	1391400	1391500	1	13422400	13422500	1	3438600	3438700	1	9660400	9660500	1	10210300	10210400	1	2320000	2320100	1	4082800	4082900	1	7399800
1	597300	597400	1	435000	435100	1	597300	597400	1	829300	829400	1	1830200	1830300	1	1114900	1115000	1	3494100	3494200	1	630800	630900	1	2557400	2557500	1	1395600	1395700	1	14165700	14165800	1	3482000	3482100	1	10547400	10547500	1	11549800	11549900	1	2320100	2320200	1	4084600	4084700	1	7434900
1	609000	609100	1	452500	452600	1	629100	629200	1	830800	830900	1	1865200	1865300	1	1120800	1120900	1	3723500	3723600	1	660400	660500	1	2557500	2557600	1	1395700	1395800	1	14165800	14165900	1	3494100	3494200	1	11349300	11349400	1	12111000	12111100	1	2320200	2320300	1	4084700	4084800	1	7435000
1	629100	629200	1	452600	452700	1	629200	629300	1	892000	892100	1	1990700	1990800	1	1120900	1121000	1	3778000	3778100	1	660500	660600	1	2557600	2557700	1	1524500	1524600	1	14731800	14731900	1	3617000	3617100	1	11550000	11550100	1	12696600	12696700	1	2324500	2324600	1	4084800	4084900	1	7457400
1	629200	629300	1	459900	460000	1	630800	630900	1	893100	893200	1	2008000	2008100	1	1143200	1143300	1	4185800	4185900	1	677500	677600	1	2557700	2557800	1	1530900	1531000	1	15076800	15076900	1	3625800	3625900	1	11550500	11550600	1	13929900	13930000	1	2325500	2325600	1	4084900	4085000	1	7613900
1	630800	630900	1	470600	470700	1	661200	661300	1	894000	894100	1	2014200	2014300	1	1257400	1257500	1	4185900	4186000	1	687400	687500	1	2557800	2557900	1	1554400	1554500	1	17514100	17514200	1	3729900	3730000	1	11550700	11550800	1	14130600	14130700	1	2325600	2325700	1	4086900	4087000	1	7614000
1	658900	659000	1	472300	472400	1	671400	671500	1	895400	895500	1	2014300	2014400	1	1258700	1258800	1	4261700	4261800	1	687500	687600	1	2557900	2558000	1	1585400	1585500	1	17514200	17514300	1	3916900	3917000	1	11550900	11551000	1	14139900	14140000	1	2327800	2327900	1	4087000	4087100	1	7813800
1	661100	661200	1	494300	494400	1	674400	674500	1	896300	896400	1	2104300	2104400	1	1266400	1266500	1	4285100	4285200	1	779800	779900	1	2558000	2558100	1	1629800	1629900	1	17587500	17587600	1	3972400	3972500	1	11551000	11551100	1	14140000	14140100	1	2327900	2328000	1	4087400	4087500	1	7813900
1	661200	661300	1	494500	494600	1	676200	676300	1	898200	898300	1	2199900	2200000	1	1266500	1266600	1	4285200	4285300	1	796500	796600	1	2558100	2558200	1	1647300	1647400	1	17716600	17716700	1	3998500	3998600	1	11551100	11551200	1	14454600	14454700	1	2329300	2329400	1	4087600	4087700	1	8415800
1	671400	671500	1	497900	498000	1	676400	676500	1	901400	901500	1	2200000	2200100	1	1279400	1279500	1	4568800	4568900	1	802600	802700	1	2558200	2558300	1	1668800	1668900	1	18132900	18133000	1	4055700	4055800	1	11666800	11666900	1	15684200	15684300	1	2330600	2330700	1	4402300	4402400	1	8417100
1	674400	674500	1	501200	501300	1	700600	700700	1	929600	929700	1	2289200	2289300	1	1279500	1279600	1	4704400	4704500	1	832600	832700	1	2558300	2558400	1	1715300	1715400	1	19040200	19040300	1	4185900	4186000	1	11667000	11667100	1	15684300	15684400	1	2330700	2330800	1	4640600	4640700	1	8417500
1	676200	676300	1	501700	501800	1	701500	701600	1	929700	929800	1	2494900	2495000	1	1300400	1300500	1	4813300	4813400	1	848200	848300	1	2558400	2558500	1	1720300	1720400	1	19049100	19049200	1	4204600	4204700	1	12111000	12111100	1	15717800	15717900	1	2331700	2331800	1	4641000	4641100	1	9655500
1	676400	676500	1	501800	501900	1	701600	701700	1	954900	955000	1	2496900	2497000	1	1311900	1312000	1	4998600	4998700	1	849300	849400	1	2558500	2558600	1	1721300	1721400	1	19049200	19049300	1	4205200	4205300	1	12615500	12615600	1	16213000	16213100	1	2331800	2331900	1	4641300	4641400	1	9655600
1	687400	687500	1	507500	507600	1	701800	701900	1	1110700	1110800	1	2497000	2497100	1	1312100	1312200	1	5046400	5046500	1	849500	849600	1	2558600	2558700	1	1774200	1774300	1	19328400	19328500	1	4285200	4285300	1	12696600	12696700	1	16222400	16222500	1	2331900	2332000	1	4644300	4644400	1	9656100
1	727700	727800	1	529200	529300	1	701900	702000	1	1143200	1143300	1	2497100	2497200	1	1312400	1312500	1	5068200	5068300	1	865400	865500	1	2558700	2558800	1	1788700	1788800	1	19333400	19333500	1	4429500	4429600	1	12922300	12922400	1	16695900	16696000	1	2332900	2333000	1	4776800	4776900	1	9659400
1	755300	755400	1	530700	530800	1	702300	702400	1	1149900	1150000	1	2497200	2497300	1	1312500	1312600	1	5090100	5090200	1	870100	870200	1	2558900	2559000	1	1840600	1840700	1	19333500	19333600	1	4439300	4439400	1	12922800	12922900	1	16696000	16696100	1	2334100	2334200	1	4777100	4777200	1	9659500
1	815200	815300	1	533500	533600	1	702800	702900	1	1150000	1150100	1	2497300	2497400	1	1313800	1313900	1	5127200	5127300	1	870900	871000	1	2559000	2559100	1	1842100	1842200	1	19483700	19483800	1	4439400	4439500	1	12923100	12923200	1	16696100	16696200	1	2334200	2334300	1	4777200	4777300	1	9659600
1	841200	841300	1	533700	533800	1	703000	703100	1	1249300	1249400	1	2497400	2497500	1	1313900	1314000	1	5159500	5159600	1	903000	903100	1	2861900	2862000	1	1871700	1871800	1	20045700	20045800	1	4580800	4580900	1	13105900	13106000	1	17618800	17618900	1	2343100	2343200	1	4777300	4777400	1	9660300
1	865400	865500	1	535100	535200	1	703100	703200	1	1249400	1249500	1	2497500	2497600	1	1361400	1361500	1	5159700	5159800	1	905400	905500	1	2940500	2940600	1	1880700	1880800	1	20877200	20877300	1	4594200	4594300	1	14139900	14140000	1	17682100	17682200	1	2343200	2343300	1	4777400	4777500	1	9660400
1	871700	871800	1	580000	580100	1	703300	703400	1	1274000	1274100	1	2522100	2522200	1	1361500	1361600	1	5254600	5254700	1	905500	905600	1	2940600	2940700	1	1990000	1990100	1	20877300	20877400	1	4704400	4704500	1	14140000	14140100	1	18399800	18399900	1	2343300	2343400	1	4777500	4777600	1	11623300
1	875800	875900	1	580100	580200	1	704700	704800	1	1288100	1288200	1	2556400	2556500	1	1389600	1389700	1	5254700	5254800	1	905600	905700	1	2940700	2940800	1	2020600	2020700	1	20886500	20886600	1	4799900	4800000	1	14337500	14337600	1	18682900	18683000	1	2345800	2345900	1	4778400	4778500	1	11668200
1	901400	901500	1	581200	581300	1	705100	705200	1	1298700	1298800	1	2556500	2556600	1	1442900	1443000	1	5501500	5501600	1	910200	910300	1	2940900	2941000	1	2023500	2023600	1	20886600	20886700	1	4805400	4805500	1	14454600	14454700	1	18684900	18685000	1	2345900	2346000	1	4778700	4778800	1	11781700
1	905600	905700	1	581300	581400	1	705200	705300	1	1300400	1300500	1	2638500	2638600	1	1482000	1482100	1	5607300	5607400	1	910300	910400	1	2941100	2941200	1	2027200	2027300	1	20949600	20949700	1	4813300	4813400	1	15392800	15392900	1	18685000	18685100	1	2346100	2346200	1	4779500	4779600	1	12111000
1	910200	910300	1	597300	597400	1	705300	705400	1	1344900	1345000	1	2650500	2650600	1	1482100	1482200	1	5637600	5637700	1	910400	910500	1	2941400	2941500	1	2129600	2129700	1	21103100	21103200	1	4912100	4912200	1	15717800	15717900	1	18685100	18685200	1	2347100	2347200	1	4779600	4779700	1	12111100
1	916600	916700	1	615800	615900	1	705700	705800	1	1350300	1350400	1	2908200	2908300	1	1524300	1524400	1	5772800	5772900	1	911500	911600	1	2961700	2961800	1	2143000	2143100	1	21108600	21108700	1	4928700	4928800	1	15933300	15933400	1	18689300	18689400	1	2347200	2347300	1	4780000	4780100	1	12696600
1	935200	935300	1	630800	630900	1	705800	705900	1	1361400	1361500	1	2934900	2935000	1	1524900	1525000	1	5917600	5917700	1	937500	937600	1	2989500	2989600	1	2143100	2143200	1	21260900	21261000	1	4962200	4962300	1	15933400	15933500	1	19378600	19378700	1	2347300	2347400	1	4981100	4981200	1	12940500
1	954800	954900	1	630900	631000	1	705900	706000	1	1361500	1361600	1	2961700	2961800	1	1525700	1525800	1	6043100	6043200	1	954800	954900	1	2989600	2989700	1	2143200	2143300	1	22109000	22109100	1	5011000	5011100	1	16235500	16235600	1	19956800	19956900	1	2347400	2347500	1	5194100	5194200	1	13668300
1	954900	955000	1	660400	660500	1	706000	706100	1	1585400	1585500	1	3001700	3001800	1	1525800	1525900	1	6282000	6282100	1	954900	955000	1	3007400	3007500	1	2145700	2145800	1	22109100	22109200	1	5046400	5046500	1	16257300	16257400	1	19956900	19957000	1	2348000	2348100	1	5194200	5194300	1	13896800
1	971000	971100	1	660500	660600	1	706900	707000	1	1585500	1585600	1	3007400	3007500	1	1530700	1530800	1	6302900	6303000	1	972000	972100	1	3007500	3007600	1	2166200	2166300	1	22109200	22109300	1	5051500	5051600	1	16359200	16359300	1	20017700	20017800	1	2348200	2348300	1	5399200	5399300	1	14278400
1	972000	972100	1	661200	661300	1	707000	707100	1	1592300	1592400	1	3012200	3012300	1	1595900	1596000	1	6304000	6304100	1	981600	981700	1	3074700	3074800	1	2180300	2180400	1	22414400	22414500	1	5345200	5345300	1	16359300	16359400	1	20445800	20445900	1	2349100	2349200	1	5769800	5769900	1	14797300
1	1033700	1033800	1	671400	671500	1	707100	707200	1	1630600	1630700	1	3074700	3074800	1	1596200	1596300	1	6408100	6408200	1	1032200	1032300	1	3269200	3269300	1	2200400	2200500	1	22426300	22426400	1	5358200	5358300	1	16695900	16696000	1	20445900	20446000	1	2349200	2349300	1	5805900	5806000	1	14797400
1	1039600	1039700	1	674400	674500	1	707200	707300	1	1843600	1843700	1	3189100	3189200	1	1596300	1596400	1	6441000	6441100	1	1033200	1033300	1	3271500	3271600	1	2200500	2200600	1	22647900	22648000	1	5375700	5375800	1	16696000	16696100	1	20852400	20852500	1	2349300	2349400	1	5822000	5822100	1	15717800
1	1065500	1065600	1	676400	676500	1	707700	707800	1	1880700	1880800	1	3230600	3230700	1	1596600	1596700	1	6441100	6441200	1	1033300	1033400	1	3778000	3778100	1	2234300	2234400	1	22648000	22648100	1	5382400	5382500	1	16696100	16696200	1	20852500	20852600	1	2349400	2349500	1	6677500	6677600	1	16235500
1	1087400	1087500	1	677500	677600	1	707800	707900	1	1987900	1988000	1	3233300	3233400	1	1596700	1596800	1	6441200	6441300	1	1064000	1064100	1	3791900	3792000	1	2237800	2237900	1	22697000	22697100	1	5534400	5534500	1	17111700	17111800	1	21670500	21670600	1	2391000	2391100	1	7228900	7229000	1	16696000
1	1093600	1093700	1	687400	687500	1	708200	708300	1	1990600	1990700	1	3234100	3234200	1	1596800	1596900	1	6619500	6619600	1	1087400	1087500	1	3792000	3792100	1	2258300	2258400	1	22766900	22767000	1	5534500	5534600	1	18399800	18399900	1	22333700	22333800	1	3421300	3421400	1	7229000	7229100	1	16696100
1	1093700	1093800	1	687500	687600	1	709600	709700	1	1999900	2000000	1	3267500	3267600	1	1596900	1597000	1	6687300	6687400	1	1093600	1093700	1	3917000	3917100	1	2258400	2258500	1	22767000	22767100	1	5607300	5607400	1	18531000	18531100	1	22333800	22333900	1	3735000	3735100	1	7229100	7229200	1	16722200
1	1110000	1110100	1	755200	755300	1	709800	709900	1	2023400	2023500	1	3267600	3267700	1	1597000	1597100	1	6731800	6731900	1	1093700	1093800	1	3917100	3917200	1	2274900	2275000	1	23171200	23171300	1	5637300	5637400	1	18625200	18625300	1	22522700	22522800	1	4285200	4285300	1	7434900	7435000	1	16722300
1	1110800	1110900	1	755300	755400	1	710000	710100	1	2145100	2145200	1	3268000	3268100	1	1608900	1609000	1	6819200	6819300	1	1100200	1100300	1	4022400	4022500	1	2315800	2315900	1	23332500	23332600	1	5637600	5637700	1	18684900	18685000	1	23535800	23535900	1	4558900	4559000	1	7435000	7435100	1	18625100
1	1110900	1111000	1	755600	755700	1	710100	710200	1	2145600	2145700	1	3268100	3268200	1	1616200	1616300	1	6851400	6851500	1	1107400	1107500	1	4185800	4185900	1	2383300	2383400	1	23332600	23332700	1	5660200	5660300	1	18685000	18685100	1	24373500	24373600	1	4666400	4666500	1	7486400	7486500	1	18625200
1	1114900	1115000	1	763500	763600	1	710600	710700	1	2145700	2145800	1	3311300	3311400	1	1635600	1635700	1	7214400	7214500	1	1109800	1109900	1	4185900	4186000	1	2410300	2410400	1	23355300	23355400	1	5688000	5688100	1	18685100	18685200	1	25326300	25326400	1	4776400	4776500	1	7487200	7487300	1	18684900
1	1115800	1115900	1	765500	765600	1	710700	710800	1	2182900	2183000	1	3525400	3525500	1	1789300	1789400	1	7243500	7243600	1	1110800	1110900	1	4261700	4261800	1	2413800	2413900	1	23455300	23455400	1	5772800	5772900	1	18689300	18689400	1	25329400	25329500	1	4776500	4776600	1	7487300	7487400	1	18685000
1	1119100	1119200	1	765600	765700	1	825500	825600	1	2185600	2185700	1	3617300	3617400	1	1819100	1819200	1	7257600	7257700	1	1110900	1111000	1	4285100	4285200	1	2429900	2430000	1	23858800	23858900	1	5786200	5786300	1	18775800	18775900	1	25329800	25329900	1	4776600	4776700	1	8093900	8094000	1	18685100
1	1132100	1132200	1	765700	765800	1	892000	892100	1	2185700	2185800	1	3700500	3700600	1	1819200	1819300	1	7257700	7257800	1	1116600	1116700	1	4285200	4285300	1	2458800	2458900	1	23858900	23859000	1	5917600	5917700	1	18775900	18776000	1	25329900	25330000	1	4780100	4780200	1	8186800	8186900	1	19843300
1	1133700	1133800	1	778300	778400	1	896300	896400	1	2186000	2186100	1	3700600	3700700	1	1819500	1819600	1	7494500	7494600	1	1129000	1129100	1	4411600	4411700	1	2486700	2486800	1	24269900	24270000	1	5967600	5967700	1	20017600	20017700	1	26041100	26041200	1	4780500	4780600	1	8502500	8502600	1	20660500
1	1149900	1150000	1	796400	796500	1	897300	897400	1	2187000	2187100	1	3700800	3700900	1	1819600	1819700	1	7516100	7516200	1	1132100	1132200	1	4411700	4411800	1	2497000	2497100	1	24780100	24780200	1	5985900	5986000	1	20017700	20017800	1	26192300	26192400	1	4780700	4780800	1	8502700	8502800	1	20660600
1	1150000	1150100	1	796500	796600	1	901300	901400	1	2188300	2188400	1	3701500	3701600	1	1819800	1819900	1	7768100	7768200	1	1133700	1133800	1	4411800	4411900	1	2497200	2497300	1	25261100	25261200	1	6014400	6014500	1	20017800	20017900	1	26267200	26267300	1	4781700	4781800	1	8619300	8619400	1	22475400
1	1159600	1159700	1	841100	841200	1	901400	901500	1	2188400	2188500	1	3701700	3701800	1	1819900	1820000	1	7768200	7768300	1	1142800	1142900	1	4704400	4704500	1	2511800	2511900	1	25832800	25832900	1	6016800	6016900	1	20238300	20238400	1	26638800	26638900	1	4781800	4781900	1	8619400	8619500	1	22475500
1	1204700	1204800	1	841200	841300	1	916600	916700	1	2191900	2192000	1	3701800	3701900	1	1820000	1820100	1	7868000	7868100	1	1142900	1143000	1	4813300	4813400	1	2511900	2512000	1	26051500	26051600	1	6043100	6043200	1	20445800	20445900	1	27236100	27236200	1	4981100	4981200	1	8634600	8634700	1	22475900
1	1204800	1204900	1	849500	849600	1	972000	972100	1	2192000	2192100	1	3702100	3702200	1	1820200	1820300	1	7868100	7868200	1	1143200	1143300	1	4926100	4926200	1	2522100	2522200	1	26217100	26217200	1	6043200	6043300	1	20445900	20446000	1	27236200	27236300	1	5006600	5006700	1	8634700	8634800	1	22478100
1	1207800	1207900	1	849600	849700	1	1110500	1110600	1	2193400	2193500	1	3702200	3702300	1	1820600	1820700	1	7992200	7992300	1	1149900	1150000	1	4998600	4998700	1	2522900	2523000	1	26218600	26218700	1	6056600	6056700	1	20852400	20852500	1	27539700	27539800	1	5080300	5080400	1	8635200	8635300	1	22478200
1	1249300	1249400	1	865400	865500	1	1110800	1110900	1	2237800	2237900	1	3702400	3702500	1	1820700	1820800	1	7992400	7992500	1	1150000	1150100	1	5127200	5127300	1	2523000	2523100	1	26382600	26382700	1	6097400	6097500	1	20852500	20852600	1	27749200	27749300	1	5168600	5168700	1	8729100	8729200	1	22813300
1	1249400	1249500	1	871700	871800	1	1114900	1115000	1	2274900	2275000	1	3702500	3702600	1	1820800	1820900	1	8046200	8046300	1	1210100	1210200	1	5254600	5254700	1	2523100	2523200	1	27149500	27149600	1	6097500	6097600	1	21302100	21302200	1	28130300	28130400	1	5194100	5194200	1	8829900	8830000	1	22872800
1	1266400	1266500	1	901400	901500	1	1119100	1119200	1	2336800	2336900	1	3702600	3702700	1	1821000	1821100	1	8080500	8080600	1	1220200	1220300	1	5254700	5254800	1	2523200	2523300	1	27201900	27202000	1	6097600	6097700	1	21306300	21306400	1	28130400	28130500	1	5194200	5194300	1	8830100	8830200	1	22872900
1	1266500	1266600	1	905400	905500	1	1132100	1132200	1	2337500	2337600	1	3702700	3702800	1	1821100	1821200	1	8080700	8080800	1	1249300	1249400	1	5274100	5274200	1	2523300	2523400	1	27202000	27202100	1	6282000	6282100	1	22093000	22093100	1	28144500	28144600	1	5769800	5769900	1	9049200	9049300	1	23323600
1	1285000	1285100	1	905600	905700	1	1149900	1150000	1	2339000	2339100	1	3702900	3703000	1	1826400	1826500	1	8307600	8307700	1	1249400	1249500	1	5489900	5490000	1	2523400	2523500	1	27711000	27711100	1	6423100	6423200	1	22502200	22502300	1	28144600	28144700	1	5847800	5847900	1	9391500	9391600	1	23323700
1	1285200	1285300	1	910200	910300	1	1150000	1150100	1	2341600	2341700	1	3703000	3703100	1	1826800	1826900	1	8381700	8381800	1	1266400	1266500	1	5581200	5581300	1	2523500	2523600	1	28068600	28068700	1	6441200	6441300	1	22524200	22524300	1	28381700	28381800	1	6677500	6677600	1	9619900	9620000	1	23323800
1	1285300	1285400	1	927600	927700	1	1204800	1204900	1	2410300	2410400	1	3703100	3703200	1	1828900	1829000	1	8462600	8462700	1	1266500	1266600	1	5581300	5581400	1	2523600	2523700	1	28144500	28144600	1	6468600	6468700	1	22531200	22531300	1	28381800	28381900	1	6677600	6677700	1	9620000	9620100	1	23533300
1	1288100	1288200	1	929600	929700	1	1204900	1205000	1	2471700	2471800	1	3703200	3703300	1	1830100	1830200	1	8553200	8553300	1	1284800	1284900	1	5595900	5596000	1	2523700	2523800	1	28150900	28151000	1	6722000	6722100	1	23082000	23082100	1	28381900	28382000	1	6677700	6677800	1	9620100	9620200	1	23693100
1	1291400	1291500	1	929700	929800	1	1249300	1249400	1	2496300	2496400	1	3763500	3763600	1	1830200	1830300	1	8688000	8688100	1	1284900	1285000	1	5607300	5607400	1	2524500	2524600	1	28534900	28535000	1	6731800	6731900	1	23208500	23208600	1	28382000	28382100	1	7165100	7165200	1	9620200	9620300	1	23693200
1	1296100	1296200	1	937500	937600	1	1249400	1249500	1	2499500	2499600	1	3772900	3773000	1	1830300	1830400	1	8709400	8709500	1	1285000	1285100	1	5637600	5637700	1	2524900	2525000	1	28602400	28602500	1	6824000	6824100	1	23873200	23873300	1	28382100	28382200	1	7165900	7166000	1	9620900	9621000	1	24373500
1	1298700	1298800	1	954800	954900	1	1266500	1266600	1	2546200	2546300	1	3773300	3773400	1	1830400	1830500	1	8785500	8785600	1	1288100	1288200	1	5752600	5752700	1	2539700	2539800	1	29624300	29624400	1	6851400	6851500	1	23873300	23873400	1	28382200	28382300	1	7166700	7166800	1	9621200	9621300	1	25330200
1	1298800	1298900	1	954900	955000	1	1285000	1285100	1	2546300	2546400	1	3773400	3773500	1	1987900	1988000	1	8814100	8814200	1	1291300	1291400	1	5753300	5753400	1	2539800	2539900	1	29886700	29886800	1	6955600	6955700	1	24647700	24647800	1	28382300	28382400	1	7167000	7167100	1	9621500	9621600	1	25357700
1	1298900	1299000	1	970800	970900	1	1285200	1285300	1	2557300	2557400	1	3773500	3773600	1	2008000	2008100	1	8886100	8886200	1	1291400	1291500	1	5923300	5923400	1	2539900	2540000	1	29931800	29931900	1	6977000	6977100	1	25801100	25801200	1	29146500	29146600	1	7228800	7228900	1	9622300	9622400	1	25359700
1	1299000	1299100	1	971000	971100	1	1291400	1291500	1	2557400	2557500	1	3773700	3773800	1	2012800	2012900	1	8886200	8886300	1	1298700	1298800	1	6043100	6043200	1	2555200	2555300	1	29931900	29932000	1	7079500	7079600	1	26041000	26041100	1	29148500	29148600	1	7228900	7229000	1	9622800	9622900	1	25361600
1	1300200	1300300	1	972000	972100	1	1299000	1299100	1	2558700	2558800	1	3773800	3773900	1	2013700	2013800	1	9109200	9109300	1	1298900	1299000	1	6068900	6069000	1	2555300	2555400	1	30073600	30073700	1	7138200	7138300	1	26307200	26307300	1	29650200	29650300	1	7229000	7229100	1	9622900	9623000	1	25378800
1	1300300	1300400	1	1032100	1032200	1	1300200	1300300	1	2623900	2624000	1	3774200	3774300	1	2014200	2014300	1	9335600	9335700	1	1300300	1300400	1	6157500	6157600	1	2555400	2555500	1	30469600	30469700	1	7140900	7141000	1	26313900	26314000	1	29650300	29650400	1	7257700	7257800	1	9655500	9655600	1	25378900
1	1300400	1300500	1	1032200	1032300	1	1300300	1300400	1	2757100	2757200	1	3774300	3774400	1	2014300	2014400	1	9452800	9452900	1	1300900	1301000	1	6200800	6200900	1	2555500	2555600	1	30735200	30735300	1	7187400	7187500	1	26314000	26314100	1	30107900	30108000	1	7257800	7257900	1	9655600	9655700	1	26481900
1	1300800	1300900	1	1033200	1033300	1	1300400	1300500	1	2757500	2757600	1	3777500	3777600	1	2149300	2149400	1	9592200	9592300	1	1305300	1305400	1	6200900	6201000	1	2555600	2555700	1	32064200	32064300	1	7219500	7219600	1	26611000	26611100	1	30142600	30142700	1	7434900	7435000	1	9655900	9656000	1	26867600
1	1300900	1301000	1	1033300	1033400	1	1305200	1305300	1	2775600	2775700	1	3902500	3902600	1	2194500	2194600	1	9592300	9592400	1	1320500	1320600	1	6263500	6263600	1	2555800	2555900	1	32064300	32064400	1	7257700	7257800	1	26611100	26611200	1	30142700	30142800	1	7435000	7435100	1	9656100	9656200	1	26867700
1	1305200	1305300	1	1038300	1038400	1	1305300	1305400	1	2775700	2775800	1	3906700	3906800	1	2194700	2194800	1	9594100	9594200	1	1342400	1342500	1	6441000	6441100	1	2555900	2556000	1	32069700	32069800	1	7300200	7300300	1	26664200	26664300	1	30151400	30151500	1	7837200	7837300	1	9659500	9659600	1	27087300
1	1305300	1305400	1	1039500	1039600	1	1347800	1347900	1	2906100	2906200	1	3919100	3919200	1	2195400	2195500	1	9595800	9595900	1	1344900	1345000	1	6441200	6441300	1	2556000	2556100	1	32070400	32070500	1	7307400	7307500	1	26867700	26867800	1	30151500	30151600	1	7868100	7868200	1	9659600	9659700	1	27091500
1	1312100	1312200	1	1087400	1087500	1	1351500	1351600	1	2909300	2909400	1	3972300	3972400	1	2198300	2198400	1	9873000	9873100	1	1345000	1345100	1	6731800	6731900	1	2556100	2556200	1	32241000	32241100	1	7307500	7307600	1	27236100	27236200	1	30223200	30223300	1	7868200	7868300	1	9660300	9660400	1	27236100
1	1312200	1312300	1	1093600	1093700	1	1361500	1361600	1	2910000	2910100	1	4055600	4055700	1	2198400	2198500	1	9873100	9873200	1	1361400	1361500	1	6954900	6955000	1	2556200	2556300	1	32868700	32868800	1	7381800	7381900	1	27282400	27282500	1	30735200	30735300	1	8729100	8729200	1	9660400	9660500	1	27236200
1	1312300	1312400	1	1093700	1093800	1	1378000	1378100	1	2910600	2910700	1	4157800	4157900	1	2199500	2199600	1	9979300	9979400	1	1361500	1361600	1	7163400	7163500	1	2556300	2556400	1	33153200	33153300	1	7411900	7412000	1	27749200	27749300	1	31132800	31132900	1	8729200	8729300	1	10072800	10072900	1	27239900
1	1314000	1314100	1	1099400	1099500	1	1379300	1379400	1	2911100	2911200	1	4184300	4184400	1	2199700	2199800	1	10320600	10320700	1	1367200	1367300	1	7243500	7243600	1	2556400	2556500	1	33347300	33347400	1	7413100	7413200	1	28144500	28144600	1	31132900	31133000	1	8886200	8886300	1	10415100	10415200	1	27240000
1	1314100	1314200	1	1100800	1100900	1	1382400	1382500	1	2916100	2916200	1	4261700	4261800	1	2199800	2199900	1	10359600	10359700	1	1382400	1382500	1	7257700	7257800	1	2556500	2556600	1	33562700	33562800	1	7428900	7429000	1	28167500	28167600	1	31930800	31930900	1	8886300	8886400	1	10415700	10415800	1	28130300
1	1314200	1314300	1	1107400	1107500	1	1391400	1391500	1	2940200	2940300	1	4262500	4262600	1	2199900	2200000	1	10367700	10367800	1	1389600	1389700	1	7546300	7546400	1	2556600	2556700	1	33562800	33562900	1	7503100	7503200	1	28381700	28381800	1	32339800	32339900	1	9623500	9623600	1	10417000	10417100	1	28144500
1	1316900	1317000	1	1109300	1109400	1	1395700	1395800	1	2940600	2940700	1	4263200	4263300	1	2200000	2200100	1	10569000	10569100	1	1389800	1389900	1	7546400	7546500	1	2556700	2556800	1	33588400	33588500	1	7656900	7657000	1	28381800	28381900	1	32457200	32457300	1	9655500	9655600	1	10417100	10417200	1	28144600
1	1342400	1342500	1	1109800	1109900	1	1442900	1443000	1	2940700	2940800	1	4263300	4263400	1	2232300	2232400	1	10596300	10596400	1	1391400	1391500	1	7657300	7657400	1	2556800	2556900	1	33643700	33643800	1	7657000	7657100	1	28381900	28382000	1	32458000	32458100	1	9655600	9655700	1	11358400	11358500	1	28381700
1	1344500	1344600	1	1110300	1110400	1	1469900	1470000	1	2941800	2941900	1	4264900	4265000	1	2274900	2275000	1	10606000	10606100	1	1395600	1395700	1	7657500	7657600	1	2556900	2557000	1	33643900	33644000	1	7733800	7733900	1	28382000	28382100	1	32458100	32458200	1	9655900	9656000	1	11358500	11358600	1	28381800
1	1345000	1345100	1	1110700	1110800	1	1709900	1710000	1	2941900	2942000	1	4265300	4265400	1	2383200	2383300	1	10621400	10621500	1	1395700	1395800	1	7658100	7658200	1	2557000	2557100	1	33649100	33649200	1	7766700	7766800	1	28382100	28382200	1	32557900	32558000	1	9656100	9656200	1	11358600	11358700	1	28381900
1	1345100	1345200	1	1110800	1110900	1	1724100	1724200	1	2944600	2944700	1	4266400	4266500	1	2383500	2383600	1	10916100	10916200	1	1442900	1443000	1	7768100	7768200	1	2557100	2557200	1	33649300	33649400	1	7768100	7768200	1	28382200	28382300	1	32580600	32580700	1	9659500	9659600	1	11358700	11358800	1	28382100
1	1347800	1347900	1	1110900	1111000	1	1726200	1726300	1	2948500	2948600	1	4266500	4266600	1	2446700	2446800	1	11041400	11041500	1	1524300	1524400	1	7781600	7781700	1	2557200	2557300	1	33656800	33656900	1	7768200	7768300	1	29176500	29176600	1	32751200	32751300	1	9659600	9659700	1	11358800	11358900	1	28382200
1	1351500	1351600	1	1114900	1115000	1	1727300	1727400	1	2961700	2961800	1	4279800	4279900	1	2450900	2451000	1	11088100	11088200	1	1524500	1524600	1	7790200	7790300	1	2557300	2557400	1	33771700	33771800	1	7868100	7868200	1	29837500	29837600	1	32751300	32751400	1	9660300	9660400	1	11359000	11359100	1	28761500
1	1361500	1361600	1	1115700	1115800	1	1744800	1744900	1	3007400	3007500	1	4295400	4295500	1	2451000	2451100	1	11132600	11132700	1	1525900	1526000	1	7790500	7790600	1	2557400	2557500	1	33903800	33903900	1	7965800	7965900	1	29877500	29877600	1	32751400	32751500	1	9660400	9660500	1	11359100	11359200	1	29973200
1	1367200	1367300	1	1115800	1115900	1	1763800	1763900	1	3007500	3007600	1	4483100	4483200	1	2494900	2495000	1	11223900	11224000	1	1530700	1530800	1	7790700	7790800	1	2557500	2557600	1	33980200	33980300	1	8025800	8025900	1	30107900	30108000	1	32752000	32752100	1	10547400	10547500	1	11359300	11359400	1	30053500
1	1377900	1378000	1	1116600	1116700	1	1763900	1764000	1	3028100	3028200	1	4524600	4524700	1	2496900	2497000	1	11349800	11349900	1	1530900	1531000	1	7790800	7790900	1	2557600	2557700	1	33980300	33980400	1	8046200	8046300	1	30142600	30142700	1	33033000	33033100	1	10886900	10887000	1	11534600	11534700	1	30053600
1	1378000	1378100	1	1120900	1121000	1	1789100	1789200	1	3075200	3075300	1	4550800	4550900	1	2497000	2497100	1	11469600	11469700	1	1608900	1609000	1	7790900	7791000	1	2557700	2557800	1	33980400	33980500	1	8080500	8080600	1	30142700	30142800	1	33033100	33033200	1	11349300	11349400	1	11549100	11549200	1	30142600
1	1379300	1379400	1	1132100	1132200	1	1830400	1830500	1	3095400	3095500	1	4553500	4553600	1	2497300	2497400	1	11509900	11510000	1	1616200	1616300	1	7791000	7791100	1	2557800	2557900	1	33988500	33988600	1	8142700	8142800	1	30467500	30467600	1	33153100	33153200	1	11549100	11549200	1	11549200	11549300	1	30735200
1	1382400	1382500	1	1133700	1133800	1	1843600	1843700	1	3134000	3134100	1	4554200	4554300	1	2497400	2497500	1	11510200	11510300	1	1629800	1629900	1	7791600	7791700	1	2557900	2558000	1	33988600	33988700	1	8161600	8161700	1	30467600	30467700	1	33153200	33153300	1	11549200	11549300	1	11549300	11549400	1	30907300
1	1391400	1391500	1	1135000	1135100	1	1884700	1884800	1	3189100	3189200	1	4554300	4554400	1	2497500	2497600	1	11510300	11510400	1	1635500	1635600	1	7868000	7868100	1	2558000	2558100	1	33988700	33988800	1	8381700	8381800	1	30687300	30687400	1	33253200	33253300	1	11549300	11549400	1	11549400	11549500	1	30907400
1	1395600	1395700	1	1135100	1135200	1	1896300	1896400	1	3239600	3239700	1	4554400	4554500	1	2522100	2522200	1	11557700	11557800	1	1668800	1668900	1	7868100	7868200	1	2558100	2558200	1	33988800	33988900	1	8438800	8438900	1	30735200	30735300	1	33336800	33336900	1	11549400	11549500	1	11549500	11549600	1	31523600
1	1395700	1395800	1	1142800	1142900	1	1992800	1992900	1	3267600	3267700	1	4558800	4558900	1	2546100	2546200	1	11557800	11557900	1	1678000	1678100	1	7990400	7990500	1	2558200	2558300	1	34818500	34818600	1	8438900	8439000	1	30815600	30815700	1	33497800	33497900	1	11549500	11549600	1	11652500	11652600	1	31523700
1	1495700	1495800	1	1143200	1143300	1	1999900	2000000	1	3269200	3269300	1	4558900	4559000	1	2546200	2546300	1	11639000	11639100	1	1690200	1690300	1	8046200	8046300	1	2558300	2558400	1	35243100	35243200	1	8463000	8463100	1	31930800	31930900	1	33497900	33498000	1	11623300	11623400	1	11817200	11817300	1	31930800
1	1503800	1503900	1	1143300	1143400	1	2023500	2023600	1	3429900	3430000	1	4585500	4585600	1	2546300	2546400	1	11640500	11640600	1	1690300	1690400	1	8138700	8138800	1	2558400	2558500	1	35428300	35428400	1	8463100	8463200	1	32071300	32071400	1	33499200	33499300	1	12047200	12047300	1	11817300	11817400	1	31983000
1	1591100	1591200	1	1149900	1150000	1	2023600	2023700	1	3532000	3532100	1	4776300	4776400	1	2650500	2650600	1	11640600	11640700	1	1715300	1715400	1	8506300	8506400	1	2558500	2558600	1	36049900	36050000	1	8474900	8475000	1	32071400	32071500	1	33499300	33499400	1	12111000	12111100	1	11828100	11828200	1	32052900
1	1627000	1627100	1	1150000	1150100	1	2054800	2054900	1	3596300	3596400	1	4776500	4776600	1	2774800	2774900	1	11674200	11674300	1	1721300	1721400	1	8553200	8553300	1	2558600	2558700	1	36198000	36198100	1	8475000	8475100	1	32117500	32117600	1	33499400	33499500	1	12133900	12134000	1	12010600	12010700	1	32053000
1	1627100	1627200	1	1159600	1159700	1	2110300	2110400	1	3616900	3617000	1	4776600	4776700	1	2861900	2862000	1	12029800	12029900	1	1763900	1764000	1	8637300	8637400	1	2558700	2558800	1	36492700	36492800	1	8548000	8548100	1	32557900	32558000	1	33500100	33500200	1	12134000	12134100	1	12010900	12011000	1	32053600
1	1647800	1647900	1	1196200	1196300	1	2110400	2110500	1	3617000	3617100	1	4776800	4776900	1	2862000	2862100	1	12170900	12171000	1	1764000	1764100	1	8727400	8727500	1	2558800	2558900	1	37248500	37248600	1	8673700	8673800	1	32751300	32751400	1	33500200	33500300	1	12301800	12301900	1	12011200	12011300	1	32053700
1	1690200	1690300	1	1204700	1204800	1	2119300	2119400	1	3763600	3763700	1	4777000	4777100	1	2902300	2902400	1	12171000	12171100	1	1774200	1774300	1	8785500	8785600	1	2558900	2559000	1	37321700	37321800	1	8727400	8727500	1	32751400	32751500	1	33500300	33500400	1	12364800	12364900	1	12047200	12047300	1	32054200
1	1690300	1690400	1	1204800	1204900	1	2143000	2143100	1	3791900	3792000	1	4777100	4777200	1	2906100	2906200	1	12577900	12578000	1	1780400	1780500	1	8814100	8814200	1	2559000	2559100	1	38861900	38862000	1	8818600	8818700	1	32752000	32752100	1	33500400	33500500	1	12498000	12498100	1	12111000	12111100	1	32077200
1	1692000	1692100	1	1207800	1207900	1	2183600	2183700	1	3792000	3792100	1	4777200	4777300	1	2934800	2934900	1	12717900	12718000	1	1788700	1788800	1	8886200	8886300	1	2559100	2559200	1	40004200	40004300	1	8835200	8835300	1	33033000	33033100	1	33500700	33500800	1	12922800	12922900	1	12214800	12214900	1	32077500
1	1692200	1692300	1	1209600	1209700	1	2186000	2186100	1	3799200	3799300	1	4777300	4777400	1	2934900	2935000	1	12718000	12718100	1	1789200	1789300	1	8930400	8930500	1	2559200	2559300	1	40462400	40462500	1	8877300	8877400	1	33033100	33033200	1	33504800	33504900	1	12922900	12923000	1	12301800	12301900	1	32077700
1	1696500	1696600	1	1222700	1222800	1	2191100	2191200	1	3924100	3924200	1	4777400	4777500	1	2935100	2935200	1	13122400	13122500	1	1789300	1789400	1	9038200	9038300	1	2623900	2624000	1	40638100	40638200	1	8877400	8877500	1	33153100	33153200	1	33504900	33505000	1	13472500	13472600	1	12435500	12435600	1	32078100
1	1703900	1704000	1	1222800	1222900	1	2191900	2192000	1	3972400	3972500	1	4777500	4777600	1	2940500	2940600	1	13160800	13160900	1	1794100	1794200	1	9040200	9040300	1	2678600	2678700	1	41296700	41296800	1	8886200	8886300	1	33499200	33499300	1	33505300	33505400	1	13645700	13645800	1	12454600	12454700	1	32078600
1	1708800	1708900	1	1242900	1243000	1	2192000	2192100	1	4047300	4047400	1	4777700	4777800	1	2997200	2997300	1	13409100	13409200	1	1794200	1794300	1	9040300	9040400	1	2757100	2757200	1	41682100	41682200	1	9002300	9002400	1	33499400	33499500	1	33505800	33505900	1	13668300	13668400	1	12454700	12454800	1	32339200
1	1709900	1710000	1	1243000	1243100	1	2232200	2232300	1	4184300	4184400	1	4777900	4778000	1	2997500	2997600	1	13435500	13435600	1	1842100	1842200	1	9040900	9041000	1	2764900	2765000	1	41774600	41774700	1	9267700	9267800	1	33500400	33500500	1	33505900	33506000	1	13896700	13896800	1	12458500	12458600	1	32339800
1	1720100	1720200	1	1249300	1249400	1	2237800	2237900	1	4262700	4262800	1	4778000	4778100	1	3001700	3001800	1	13478000	13478100	1	1843600	1843700	1	9041000	9041100	1	2774800	2774900	1	42160200	42160300	1	9292700	9292800	1	33500500	33500600	1	33506200	33506300	1	13903500	13903600	1	12458600	12458700	1	32339900
1	1721900	1722000	1	1249400	1249500	1	2309200	2309300	1	4262800	4262900	1	4778100	4778200	1	3007400	3007500	1	13598100	13598200	1	1871500	1871600	1	9041100	9041200	1	2861900	2862000	1	42161600	42161700	1	9313900	9314000	1	33500700	33500800	1	33506300	33506400	1	14454600	14454700	1	12466900	12467000	1	32457100
1	1724100	1724200	1	1257000	1257100	1	2338900	2339000	1	4305400	4305500	1	4778200	4778300	1	3007700	3007800	1	13853000	13853100	1	1871700	1871800	1	9041200	9041300	1	2862000	2862100	1	42551500	42551600	1	9339200	9339300	1	33504800	33504900	1	33506400	33506500	1	14797300	14797400	1	12536600	12536700	1	32457200
1	1727200	1727300	1	1257100	1257200	1	2339000	2339100	1	4439300	4439400	1	4778300	4778400	1	3074700	3074800	1	13989600	13989700	1	1880700	1880800	1	9041300	9041400	1	2882900	2883000	1	42551600	42551700	1	9557500	9557600	1	33505300	33505400	1	33506500	33506600	1	15247800	15247900	1	12696600	12696700	1	32457900
1	1744800	1744900	1	1266400	1266500	1	2341600	2341700	1	4439400	4439500	1	4778500	4778600	1	3230500	3230600	1	14194500	14194600	1	1950400	1950500	1	9041700	9041800	1	2896600	2896700	1	42551700	42551800	1	9592300	9592400	1	33505700	33505800	1	33506600	33506700	1	15717800	15717900	1	12796300	12796400	1	32458000
1	1763800	1763900	1	1266500	1266600	1	2383500	2383600	1	4453100	4453200	1	4778700	4778800	1	3230600	3230700	1	14347900	14348000	1	1965500	1965600	1	9041800	9041900	1	2906100	2906200	1	42553400	42553500	1	9653100	9653200	1	33505800	33505900	1	33506700	33506800	1	15717900	15718000	1	12922900	12923000	1	32458100
1	1763900	1764000	1	1274000	1274100	1	2410100	2410200	1	4469700	4469800	1	4779300	4779400	1	3232100	3232200	1	14350000	14350100	1	1965600	1965700	1	9041900	9042000	1	2940000	2940100	1	42794500	42794600	1	9692900	9693000	1	33505900	33506000	1	33506800	33506900	1	16218600	16218700	1	12966600	12966700	1	32725700
1	1772600	1772700	1	1284800	1284900	1	2410200	2410300	1	4469800	4469900	1	4780100	4780200	1	3233300	3233400	1	14455700	14455800	1	1990000	1990100	1	9042000	9042100	1	2940200	2940300	1	42905400	42905500	1	9731600	9731700	1	33506100	33506200	1	33506900	33507000	1	16257300	16257400	1	13022000	13022100	1	33153200
1	1786300	1786400	1	1284900	1285000	1	2410300	2410400	1	4554000	4554100	1	4780300	4780400	1	3233700	3233800	1	14455800	14455900	1	1990600	1990700	1	9042100	9042200	1	2940500	2940600	1	42917000	42917100	1	9778100	9778200	1	33506200	33506300	1	33507000	33507100	1	16353600	16353700	1	13404000	13404100	1	33500400
1	1789100	1789200	1	1285000	1285100	1	2494900	2495000	1	4585500	4585600	1	4780500	4780600	1	3234100	3234200	1	14479100	14479200	1	2007800	2007900	1	9042400	9042500	1	2940600	2940700	1	42917100	42917200	1	9792200	9792300	1	33506300	33506400	1	33509600	33509700	1	17681900	17682000	1	13498000	13498100	1	33500600
1	1794100	1794200	1	1285100	1285200	1	2496300	2496400	1	4603800	4603900	1	4780600	4780700	1	3234400	3234500	1	14516500	14516600	1	2008000	2008100	1	9043300	9043400	1	2940700	2940800	2	214400	214500	1	9873000	9873100	1	33506400	33506500	1	33511200	33511300	1	18014200	18014300	1	13498600	13498700	1	33500700
1	1832100	1832200	1	1285200	1285300	1	2497000	2497100	1	4605500	4605600	1	4780900	4781000	1	3234500	3234600	1	14516600	14516700	1	2014100	2014200	1	9109200	9109300	1	2941300	2941400	2	617900	618000	1	9873100	9873200	1	33506500	33506600	1	33511500	33511600	1	18598100	18598200	1	13498700	13498800	1	33506100
1	1842100	1842200	1	1285300	1285400	1	2497100	2497200	1	4605800	4605900	1	4781600	4781700	1	3239700	3239800	1	14798000	14798100	1	2014200	2014300	1	9436500	9436600	1	2941400	2941500	2	618000	618100	1	9899600	9899700	1	33506600	33506700	1	33511800	33511900	1	18598200	18598300	1	13498800	13498900	1	33506200
1	1843600	1843700	1	1287300	1287400	1	2497200	2497300	1	4605900	4606000	1	4781700	4781800	1	3245600	3245700	1	14894300	14894400	1	2014300	2014400	1	9436600	9436700	1	2941500	2941600	2	720900	721000	1	9908300	9908400	1	33506700	33506800	1	33512000	33512100	1	18684900	18685000	1	13499900	13500000	1	33506300
1	1871500	1871600	1	1288100	1288200	1	2509900	2510000	1	4606600	4606700	1	4813300	4813400	1	3267300	3267400	1	14995300	14995400	1	2020600	2020700	1	9436700	9436800	1	2948200	2948300	2	815700	815800	1	9908400	9908500	1	33506800	33506900	1	33512200	33512300	1	18685000	18685100	1	13500000	13500100	1	33506500
1	1880700	1880800	1	1298700	1298800	1	2522100	2522200	1	4608000	4608100	1	4932600	4932700	1	3267600	3267700	1	14995400	14995500	1	2023500	2023600	1	9437000	9437100	1	2948300	2948400	2	902900	903000	1	9979300	9979400	1	33506900	33507000	1	33512500	33512600	1	18685100	18685200	1	13500600	13500700	1	33506600
1	1884700	1884800	1	1300400	1300500	1	2522200	2522300	1	4608900	4609000	1	4932700	4932800	1	3267700	3267800	1	15017300	15017400	1	2039800	2039900	1	9437100	9437200	1	2948500	2948600	2	1054700	1054800	1	9979400	9979500	1	33507000	33507100	1	33512600	33512700	1	18775800	18775900	1	13628400	13628500	1	33506700
1	1896300	1896400	1	1305200	1305300	1	2543600	2543700	1	4609300	4609400	1	4932800	4932900	1	3267900	3268000	1	15049800	15049900	1	2104600	2104700	1	9437200	9437300	1	2961700	2961800	2	1230500	1230600	1	10051400	10051500	1	33509600	33509700	1	33517600	33517700	1	18775900	18776000	1	13630300	13630400	1	33506800
1	1937600	1937700	1	1305300	1305400	1	2546300	2546400	1	4610000	4610100	1	4933000	4933100	1	3268000	3268100	1	15071600	15071700	1	2104700	2104800	1	9437300	9437400	1	2989500	2989600	2	2711900	2712000	1	10187900	10188000	1	33512500	33512600	1	33520500	33520600	1	19140500	19140600	1	13724800	13724900	1	33506900
1	1988100	1988200	1	1312000	1312100	1	2553000	2553100	1	4857000	4857100	1	4933100	4933200	1	3268100	3268200	1	15777200	15777300	1	2105700	2105800	1	9437400	9437500	1	2989600	2989700	2	2712000	2712100	1	10606000	10606100	1	33512600	33512700	1	33522000	33522100	1	19140600	19140700	1	13740300	13740400	1	33507000
1	1988200	1988300	1	1312100	1312200	1	2579000	2579100	1	4860100	4860200	1	5005800	5005900	1	3311300	3311400	1	16320900	16321000	1	2110400	2110500	1	9437500	9437600	1	3007400	3007500	2	2720900	2721000	1	10916100	10916200	1	33516800	33516900	1	33523000	33523100	1	19140700	19140800	1	13740400	13740500	1	33512600
1	1988300	1988400	1	1312200	1312300	1	2656100	2656200	1	4860400	4860500	1	5051500	5051600	1	3384200	3384300	1	16970200	16970300	1	2110500	2110600	1	9437600	9437700	1	3007500	3007600	2	2861600	2861700	1	11041400	11041500	1	33517600	33517700	1	33523200	33523300	1	19145000	19145100	1	13742400	13742500	1	33532200
1	1990600	1990700	1	1312400	1312500	1	2877900	2878000	1	4861400	4861500	1	5080000	5080100	1	3384300	3384400	1	16970300	16970400	1	2112600	2112700	1	9437700	9437800	1	3008600	3008700	2	2884100	2884200	1	11048600	11048700	1	33519400	33519500	1	33523500	33523600	1	19145100	19145200	1	13825800	13825900	1	33532300
1	1992800	1992900	1	1312500	1312600	1	2882700	2882800	1	4861500	4861600	1	5080300	5080400	1	3384400	3384500	1	17431400	17431500	1	2118500	2118600	1	9437800	9437900	1	3074700	3074800	2	3033700	3033800	1	11048700	11048800	1	33520400	33520500	1	33524300	33524400	1	19145200	19145300	1	13896800	13896900	1	33532800
1	1999900	2000000	1	1313800	1313900	1	2902300	2902400	1	4861700	4861800	1	5081300	5081400	1	3384500	3384600	1	17431500	17431600	1	2118600	2118700	1	9437900	9438000	1	3074800	3074900	2	3035900	3036000	1	11056500	11056600	1	33521300	33521400	1	33524400	33524500	1	19419700	19419800	1	14130400	14130500	1	33544700
1	2006000	2006100	1	1313900	1314000	1	2906100	2906200	1	4863200	4863300	1	5085000	5085100	1	3393200	3393300	1	17501000	17501100	1	2129400	2129500	1	9438000	9438100	1	3194100	3194200	2	3113300	3113400	1	11056600	11056700	1	33521800	33521900	1	33524500	33524600	1	19810500	19810600	1	14130500	14130600	1	33544800
1	2008000	2008100	1	1314100	1314200	1	2915800	2915900	1	4863900	4864000	1	5085100	5085200	1	3525400	3525500	1	17513900	17514000	1	2129500	2129600	1	9438100	9438200	1	3221000	3221100	2	3319100	3319200	1	11070700	11070800	1	33522000	33522100	1	33524700	33524800	1	20398800	20398900	1	14454600	14454700	1	33544900
1	2014200	2014300	1	1314200	1314300	1	2916100	2916200	1	4864000	4864100	1	5254600	5254700	1	3617300	3617400	1	17514000	17514100	1	2129600	2129700	1	9438200	9438300	1	3241000	3241100	2	3623200	3623300	1	11082800	11082900	1	33522100	33522200	1	33525300	33525400	1	20398900	20399000	1	14520800	14520900	1	33545200
1	2014300	2014400	1	1314300	1314400	1	2941800	2941900	1	4867100	4867200	1	5254700	5254800	1	3617400	3617500	1	17514100	17514200	1	2143000	2143100	1	9438300	9438400	1	3245600	3245700	2	4730300	4730400	1	11082900	11083000	1	33524700	33524800	1	33525400	33525500	1	20403500	20403600	1	14797300	14797400	1	33545300
1	2020600	2020700	1	1323500	1323600	1	2941900	2942000	1	4947800	4947900	1	5274100	5274200	1	3700300	3700400	1	17514200	17514300	1	2143100	2143200	1	9438400	9438500	1	3269200	3269300	2	4730400	4730500	1	11353800	11353900	1	33532400	33532500	1	33526400	33526500	1	20404700	20404800	1	15247800	15247900	1	33545400
1	2023500	2023600	1	1342400	1342500	1	2942600	2942700	1	4947900	4948000	1	5451800	5451900	1	3700500	3700600	1	17716500	17716600	1	2143200	2143300	1	9438500	9438600	1	3400600	3400700	2	4734500	4734600	1	11469600	11469700	1	33532500	33532600	1	33527000	33527100	1	20404800	20404900	1	15248000	15248100	1	33545500
1	2023600	2023700	1	1344900	1345000	1	2961700	2961800	1	4948000	4948100	1	5463400	5463500	1	3700600	3700700	1	17716600	17716700	1	2145100	2145200	1	9438600	9438700	1	3411100	3411200	2	4830700	4830800	1	11509900	11510000	1	33532600	33532700	1	33527500	33527600	1	20418000	20418100	1	15684200	15684300	1	33550400
1	2033500	2033600	1	1361400	1361500	1	2990400	2990500	1	4975700	4975800	1	5473100	5473200	1	3700700	3700800	1	17959000	17959100	1	2166200	2166300	1	9438700	9438800	1	3438000	3438100	2	5732300	5732400	1	11510200	11510300	1	33532700	33532800	1	33528500	33528600	1	20418100	20418200	1	15684300	15684400	1	33554100
1	2054800	2054900	1	1361500	1361600	1	2997500	2997600	1	4988400	4988500	1	5473700	5473800	1	3700800	3700900	1	18072300	18072400	1	2180300	2180400	1	9438800	9438900	1	3439200	3439300	2	6495800	6495900	1	11594700	11594800	1	33532800	33532900	1	33528700	33528800	1	20418200	20418300	1	15717800	15717900	1	33555500
1	2068700	2068800	1	1370000	1370100	1	3001700	3001800	1	4988500	4988600	1	5485700	5485800	1	3701300	3701400	1	18133800	18133900	1	2200400	2200500	1	9438900	9439000	1	3487100	3487200	2	6548100	6548200	1	11599000	11599100	1	33532900	33533000	1	33532100	33532200	1	20418300	20418400	1	15717900	15718000	1	33555600
1	2110300	2110400	1	1370100	1370200	1	3007400	3007500	1	4998600	4998700	1	5485800	5485900	1	3701400	3701500	1	18242200	18242300	1	2232200	2232300	1	9439000	9439100	1	3494100	3494200	2	6662600	6662700	1	11666700	11666800	1	33533000	33533100	1	33532300	33532400	1	20421300	20421400	1	15868400	15868500	1	33563600
1	2110400	2110500	1	1377900	1378000	1	3074700	3074800	1	5051200	5051300	1	5486000	5486100	1	3701500	3701600	1	18242300	18242400	1	2258300	2258400	1	9439100	9439200	1	3497700	3497800	2	6663900	6664000	1	11666800	11666900	1	33533100	33533200	1	33532400	33532500	1	20452600	20452700	1	15869500	15869600	1	33570300
1	2110500	2110600	1	1382300	1382400	1	3143500	3143600	1	5074300	5074400	1	5486100	5486200	1	3701600	3701700	1	18242400	18242500	1	2258400	2258500	1	9439200	9439300	1	3616300	3616400	2	6994600	6994700	1	11667000	11667100	1	33533200	33533300	1	33532500	33532600	1	20452700	20452800	1	15869700	15869800	1	33586500
1	2119300	2119400	1	1382400	1382500	1	3219300	3219400	1	5126900	5127000	1	5579300	5579400	1	3701700	3701800	1	18775400	18775500	1	2274800	2274900	1	9439300	9439400	1	3617300	3617400	2	6994700	6994800	1	11667100	11667200	1	33533300	33533400	1	33532600	33532700	1	20452800	20452900	1	15884000	15884100	1	33586600
1	2125000	2125100	1	1391400	1391500	1	3219600	3219700	1	5127200	5127300	1	5579400	5579500	1	3701800	3701900	1	18898700	18898800	1	2274900	2275000	1	9439400	9439500	1	3723500	3723600	2	6995300	6995400	1	11668100	11668200	1	33533400	33533500	1	33532700	33532800	1	20452900	20453000	1	16148300	16148400	1	33586800
1	2129500	2129600	1	1395600	1395700	1	3239600	3239700	1	5127400	5127500	1	5579600	5579700	1	3701900	3702000	1	18898800	18898900	1	2275000	2275100	1	9439500	9439600	1	3729500	3729600	2	6995400	6995500	1	11669000	11669100	1	33533500	33533600	1	33532800	33532900	1	20453000	20453100	1	16148400	16148500	1	33586900
1	2130000	2130100	1	1395700	1395800	1	3240900	3241000	1	5127500	5127600	1	5579700	5579800	1	3702000	3702100	1	19040200	19040300	1	2315700	2315800	1	9439600	9439700	1	3729900	3730000	2	6995500	6995600	1	11674200	11674300	1	33533600	33533700	1	33532900	33533000	1	20453100	20453200	1	16213000	16213100	1	33587000
1	2130100	2130200	1	1495600	1495700	1	3245600	3245700	1	5251500	5251600	1	5579800	5579900	1	3702100	3702200	1	19055100	19055200	1	2315800	2315900	1	9439700	9439800	1	3763400	3763500	2	7130700	7130800	1	11767900	11768000	1	33534000	33534100	1	33533000	33533100	1	20455400	20455500	1	16216200	16216300	1	33587100
1	2143000	2143100	1	1495700	1495800	1	3245700	3245800	1	5274100	5274200	1	5581600	5581700	1	3702200	3702300	1	19134900	19135000	1	2325600	2325700	1	9439800	9439900	1	3774300	3774400	2	8038300	8038400	1	12218500	12218600	1	33534100	33534200	1	33533100	33533200	1	20455500	20455600	1	16218700	16218800	1	33587200
1	2145100	2145200	1	1524300	1524400	1	3268100	3268200	1	5345100	5345200	1	5581700	5581800	1	3702300	3702400	1	19407800	19407900	1	2332400	2332500	1	9439900	9440000	1	3778000	3778100	2	8129800	8129900	1	12219500	12219600	1	33534300	33534400	1	33533200	33533300	1	20455600	20455700	1	16222400	16222500	1	33587300
1	2145600	2145700	1	1530700	1530800	1	3269200	3269300	1	5484500	5484600	1	5581800	5581900	1	3702400	3702500	1	19407900	19408000	1	2353900	2354000	1	9440300	9440400	1	3791900	3792000	2	8393300	8393400	1	12318900	12319000	1	33535400	33535500	1	33533300	33533400	1	20462600	20462700	1	16273700	16273800	1	33587400
1	2145700	2145800	1	1580200	1580300	1	3271500	3271600	1	5502000	5502100	1	5581900	5582000	1	3702500	3702600	1	19862500	19862600	1	2383200	2383300	1	9440400	9440500	1	3884400	3884500	2	8393400	8393500	1	12428500	12428600	1	33539500	33539600	1	33533400	33533500	1	20462700	20462800	1	16274300	16274400	1	33587500
1	2145800	2145900	1	1585400	1585500	1	3380200	3380300	1	5557500	5557600	1	5582000	5582100	1	3702700	3702800	1	20046600	20046700	1	2383300	2383400	1	9440500	9440600	1	3902400	3902500	2	8887100	8887200	1	12891800	12891900	1	33544600	33544700	1	33533500	33533600	1	20462800	20462900	1	16274400	16274500	1	33587900
1	2232200	2232300	1	1585500	1585600	1	3400900	3401000	1	5572200	5572300	1	5582100	5582200	1	3702900	3703000	1	20651100	20651200	1	2383400	2383500	1	9440600	9440700	1	3916900	3917000	2	9597200	9597300	1	12933600	12933700	1	33544700	33544800	1	33533600	33533700	1	20462900	20463000	1	16274500	16274600	1	33588000
1	2237800	2237900	1	1590700	1590800	1	3411100	3411200	1	5632000	5632100	1	5582200	5582300	1	3703000	3703100	1	20914200	20914300	1	2383500	2383600	1	9459500	9459600	1	3917000	3917100	2	9823100	9823200	1	12939400	12939500	1	33544800	33544900	1	33533800	33533900	1	20917600	20917700	1	16352000	16352100	1	33588700
1	2238900	2239000	1	1591100	1591200	1	3492800	3492900	1	5637200	5637300	1	5582300	5582400	1	3703100	3703200	1	20960000	20960100	1	2410300	2410400	1	9459600	9459700	1	3917100	3917200	2	9902400	9902500	1	12939500	12939600	1	33544900	33545000	1	33533900	33534000	1	21302100	21302200	1	16353600	16353700	1	33663400
1	2239900	2240000	1	1607500	1607600	1	3596300	3596400	1	5667300	5667400	1	5582400	5582500	1	3703200	3703300	1	20985300	20985400	1	2413800	2413900	1	9547300	9547400	1	3964700	3964800	2	9944700	9944800	1	12939800	12939900	1	33545000	33545100	1	33534000	33534100	1	21312900	21313000	1	17004900	17005000	1	34203200
1	2244200	2244300	1	1607600	1607700	1	3636900	3637000	1	5667400	5667500	1	5582500	5582600	1	3703300	3703400	1	21504300	21504400	1	2429900	2430000	1	9547400	9547500	1	3972300	3972400	2	10289400	10289500	1	13122400	13122500	1	33545100	33545200	1	33534100	33534200	1	22149400	22149500	1	17018600	17018700	1	34372900
1	2244300	2244400	1	1608800	1608900	1	3637100	3637200	1	5752500	5752600	1	5582600	5582700	1	3748600	3748700	1	21504400	21504500	1	2440600	2440700	1	9983600	9983700	1	4055800	4055900	2	10622200	10622300	1	13125900	13126000	1	33545200	33545300	1	33534200	33534300	1	22222000	22222100	1	17018700	17018800	1	34942600
1	2258300	2258400	1	1608900	1609000	1	3637200	3637300	1	5752600	5752700	1	5582700	5582800	1	3759300	3759400	1	22305100	22305200	1	2445300	2445400	1	9989600	9989700	1	4055900	4056000	2	10622300	10622400	1	13127300	13127400	1	33545300	33545400	1	33534300	33534400	1	22222100	22222200	1	17036800	17036900	1	35108700
1	2258400	2258500	1	1610200	1610300	1	3778000	3778100	1	5755300	5755400	1	5582800	5582900	1	3763500	3763600	1	22335900	22336000	1	2447700	2447800	1	9999400	9999500	1	4056000	4056100	2	10627700	10627800	1	13409100	13409200	1	33545400	33545500	1	33534400	33534500	1	22222200	22222300	1	17095000	17095100	1	35264200
1	2274900	2275000	1	1616100	1616200	1	3944500	3944600	1	5755400	5755500	1	5582900	5583000	1	3763600	3763700	1	22336000	22336100	1	2458800	2458900	1	10000600	10000700	1	4184300	4184400	2	10932500	10932600	1	13432300	13432400	1	33545500	33545600	1	33534500	33534600	1	22222300	22222400	1	17095100	17095200	1	35485000
1	2289200	2289300	1	1616200	1616300	1	3967100	3967200	1	5780900	5781000	1	5583000	5583100	1	3764900	3765000	1	22421900	22422000	1	2476000	2476100	1	10000700	10000800	1	4185800	4185900	2	11601100	11601200	1	13435500	13435600	1	33545600	33545700	1	33535400	33535500	1	22222400	22222500	1	17095500	17095600	1	35798400
1	2313100	2313200	1	1617500	1617600	1	3967200	3967300	1	5875400	5875500	1	5583100	5583200	1	3772500	3772600	1	22445900	22446000	1	2476100	2476200	1	10031400	10031500	1	4185900	4186000	2	11601200	11601300	1	13569700	13569800	1	33550400	33550500	1	33540600	33540700	1	22222500	22222600	1	17095600	17095700	1	35801500
1	2316600	2316700	1	1619400	1619500	1	4022200	4022300	1	5875500	5875600	1	5583200	5583300	1	3772900	3773000	1	22487300	22487400	1	2486700	2486800	1	10031500	10031600	1	4193800	4193900	2	12008400	12008500	1	13636000	13636100	1	33552600	33552700	1	33542900	33543000	1	22222600	22222700	1	17283800	17283900	1	36061500
1	2317100	2317200	1	1627600	1627700	1	4055700	4055800	1	5917500	5917600	1	5583400	5583500	1	3773200	3773300	1	22501700	22501800	1	2492300	2492400	1	10031800	10031900	1	4208000	4208100	2	12238100	12238200	1	13920500	13920600	1	33552700	33552800	1	33544600	33544700	1	22233800	22233900	1	17283900	17284000	1	36501200
1	2319300	2319400	1	1629800	1629900	1	4097100	4097200	1	5917700	5917800	1	5583600	5583700	1	3773300	3773400	1	22521700	22521800	1	2492400	2492500	1	10031900	10032000	1	4251900	4252000	2	13162300	13162400	1	13989600	13989700	1	33552800	33552900	1	33544700	33544800	1	22233900	22234000	1	17289400	17289500	1	37314700
1	2320100	2320200	1	1630600	1630700	1	4097200	4097300	1	6002300	6002400	1	5583700	5583800	1	3773400	3773500	1	22561700	22561800	1	2495000	2495100	1	10032200	10032300	1	4261700	4261800	2	13849000	13849100	1	13990100	13990200	1	33552900	33553000	1	33544800	33544900	1	22234000	22234100	1	17473500	17473600	1	37314800
1	2325600	2325700	1	1690200	1690300	1	4164700	4164800	1	6043200	6043300	1	5583900	5584000	1	3773500	3773600	1	22696800	22696900	1	2496300	2496400	1	10032600	10032700	1	4262700	4262800	2	18167100	18167200	1	14057300	14057400	1	33553000	33553100	1	33544900	33545000	1	22234100	22234200	1	17475200	17475300	1	37415200
1	2329200	2329300	1	1690300	1690400	1	4184300	4184400	1	6061000	6061100	1	5584300	5584400	1	3773700	3773800	1	22697000	22697100	1	2496400	2496500	1	10033400	10033500	1	4262800	4262900	2	18470100	18470200	1	14110800	14110900	1	33554500	33554600	1	33545000	33545100	1	22234200	22234300	1	17553400	17553500	1	37415300
1	2329400	2329500	1	1704800	1704900	1	4185900	4186000	1	6064700	6064800	1	5584500	5584600	1	3773800	3773900	1	23143200	23143300	1	2496500	2496600	1	10344800	10344900	1	4279400	4279500	2	18470200	18470300	1	14165700	14165800	1	33559100	33559200	1	33545100	33545200	1	22234300	22234400	1	17553500	17553600	1	37693500
1	2329500	2329600	1	1709900	1710000	1	4190900	4191000	1	6064900	6065000	1	5584800	5584900	1	3774200	3774300	1	23276100	23276200	1	2499500	2499600	1	10427700	10427800	1	4285100	4285200	2	18470400	18470500	1	14165800	14165900	1	33559200	33559300	1	33545200	33545300	1	22234400	22234500	1	17640000	17640100	1	38167300
1	2332400	2332500	1	1721900	1722000	1	4200000	4200100	1	6098800	6098900	1	5584900	5585000	1	3774300	3774400	1	23309400	23309500	1	2517300	2517400	1	10427800	10427900	1	4285200	4285300	2	18471400	18471500	1	14347900	14348000	1	33561600	33561700	1	33545300	33545400	1	22234500	22234600	1	18456700	18456800	1	38167400
1	2333100	2333200	1	1726000	1726100	1	4200400	4200500	1	6098900	6099000	1	5585200	5585300	1	3777500	3777600	1	23310800	23310900	1	2522000	2522100	1	10432700	10432800	1	4305900	4306000	2	18520100	18520200	1	14350000	14350100	1	33561800	33561900	1	33545400	33545500	1	22444200	22444300	1	18684900	18685000	1	38430300
1	2334800	2334900	1	1727200	1727300	1	4261700	4261800	1	6099700	6099800	1	5585600	5585700	1	3778000	3778100	1	23311000	23311100	1	2522100	2522200	1	10569000	10569100	1	4411600	4411700	2	18534800	18534900	1	14358500	14358600	1	33561900	33562000	1	33545500	33545600	1	22502200	22502300	1	18685000	18685100	1	38430400
1	2342200	2342300	1	1762600	1762700	1	4279400	4279500	1	6099800	6099900	1	5586000	5586100	1	3902500	3902600	1	23332500	23332600	1	2539700	2539800	1	10596300	10596400	1	4411700	4411800	2	19181600	19181700	1	14391700	14391800	1	33562200	33562300	1	33545600	33545700	1	22796700	22796800	1	18685100	18685200	1	38495500
1	2342300	2342400	1	1762700	1762800	1	4351900	4352000	1	6163700	6163800	1	5586100	5586200	1	3902600	3902700	1	23332600	23332700	1	2539800	2539900	1	10852800	10852900	1	4549600	4549700	2	19348800	19348900	1	14455700	14455800	1	33562700	33562800	1	33550400	33550500	1	22815600	22815700	1	19120100	19120200	1	38495600
1	2343100	2343200	1	1780200	1780300	1	4410200	4410300	1	6213300	6213400	1	5586400	5586500	1	3906700	3906800	1	23332700	23332800	1	2539900	2540000	1	10862600	10862700	1	4559600	4559700	2	20074200	20074300	1	14455800	14455900	1	33562800	33562900	1	33552700	33552800	1	22815700	22815800	1	19419700	19419800	1	39095100
1	2343200	2343300	1	1788900	1789000	1	4448400	4448500	1	6228700	6228800	1	5586800	5586900	1	3966100	3966200	1	23332800	23332900	1	2544500	2544600	1	10863300	10863400	1	4576300	4576400	2	20079400	20079500	1	14479100	14479200	1	33563600	33563700	1	33552900	33553000	1	23084300	23084400	1	19584500	19584600	1	39117400
1	2345800	2345900	1	1789100	1789200	1	4553700	4553800	1	6302000	6302100	1	5586900	5587000	1	3970100	3970200	1	23355300	23355400	1	2551500	2551600	1	10863700	10863800	1	4580800	4580900	2	20079500	20079600	1	14633000	14633100	1	33564700	33564800	1	33554100	33554200	1	23311200	23311300	1	19584600	19584700	1	39123300
1	2345900	2346000	1	1789200	1789300	1	4568800	4568900	1	6302900	6303000	1	5587000	5587100	1	3971800	3971900	1	23590600	23590700	1	2623900	2624000	1	10863800	10863900	1	4580900	4581000	2	20687800	20687900	1	14677800	14677900	1	33567600	33567700	1	33554200	33554300	1	23436800	23436900	1	19584700	19584800	1	39247300
1	2349100	2349200	1	1789300	1789400	1	4578500	4578600	1	6381100	6381200	1	5587100	5587200	1	3972200	3972300	1	23590800	23590900	1	2630100	2630200	1	10864400	10864500	1	4594200	4594300	2	21395600	21395700	1	14681100	14681200	1	33567700	33567800	1	33554300	33554400	1	23522700	23522800	1	19598800	19598900	1	39433600
1	2349200	2349300	1	1794000	1794100	1	4585500	4585600	1	6441200	6441300	1	5587200	5587300	1	3972300	3972400	1	23926600	23926700	1	2630300	2630400	1	10916100	10916200	1	4635700	4635800	2	21395700	21395800	1	14882400	14882500	1	33567900	33568000	1	33554400	33554500	1	24424700	24424800	1	19598900	19599000	1	39433700
1	2349300	2349400	1	1794100	1794200	1	4599200	4599300	1	6489700	6489800	1	5587500	5587600	1	4022200	4022300	1	23926700	23926800	1	2630900	2631000	1	10923300	10923400	1	4635800	4635900	2	22549100	22549200	1	14894400	14894500	1	33568200	33568300	1	33554500	33554600	1	24615900	24616000	1	19615000	19615100	1	39434200
1	2353900	2354000	1	1794300	1794400	1	4599700	4599800	1	6539700	6539800	1	5587600	5587700	1	4061500	4061600	1	24031500	24031600	1	2647200	2647300	1	10923400	10923500	1	4652400	4652500	2	22554800	22554900	1	14917400	14917500	1	33569300	33569400	1	33554600	33554700	1	25326200	25326300	1	19617600	19617700	1	39591800
1	2354000	2354100	1	1830400	1830500	1	4600000	4600100	1	6579300	6579400	1	5587700	5587800	1	4061600	4061700	1	24031700	24031800	1	2678600	2678700	1	10923500	10923600	1	4701900	4702000	2	23224000	23224100	1	15017300	15017400	1	33570200	33570300	1	33559100	33559200	1	25326300	25326400	1	19643500	19643600	1	39637100
1	2383300	2383400	1	1832100	1832200	1	4605500	4605600	1	6579400	6579500	1	5587800	5587900	1	4157800	4157900	1	24162800	24162900	1	2711900	2712000	1	10923600	10923700	1	4702000	4702100	2	23503100	23503200	1	15155600	15155700	1	33570300	33570400	1	33559200	33559300	1	25326400	25326500	1	19651800	19651900	1	40389700
1	2383500	2383600	1	1832300	1832400	1	4606400	4606500	1	6722000	6722100	1	5587900	5588000	1	4157900	4158000	1	24372400	24372500	1	2735400	2735500	1	10923700	10923800	1	4784100	4784200	2	23510200	23510300	1	15234000	15234100	1	33571600	33571700	1	33559400	33559500	1	25326700	25326800	1	19654600	19654700	1	40624900
1	2410100	2410200	1	1840600	1840700	1	4609300	4609400	1	6747000	6747100	1	5588200	5588300	1	4184300	4184400	1	24779800	24779900	1	2749500	2749600	1	10923800	10923900	1	4805400	4805500	2	23769900	23770000	1	16175500	16175600	1	33571700	33571800	1	33559600	33559700	1	25326800	25326900	1	19656400	19656500	1	40735100
1	2410200	2410300	1	1842100	1842200	1	4652400	4652500	1	6750800	6750900	1	5588300	5588400	1	4185900	4186000	1	24779900	24780000	1	2757100	2757200	1	10923900	10924000	1	4813300	4813400	2	23770000	23770100	1	16324600	16324700	1	33582000	33582100	1	33561600	33561700	1	25329400	25329500	1	19656600	19656700	1	40735200
1	2410300	2410400	1	1843600	1843700	1	4803900	4804000	1	6752700	6752800	1	5588400	5588500	1	4208200	4208300	1	24780000	24780100	1	2757400	2757500	1	10924000	10924100	1	4832100	4832200	2	24022000	24022100	1	16324700	16324800	1	33582100	33582200	1	33561900	33562000	1	25329800	25329900	1	19656800	19656900	1	40793700
1	2413800	2413900	1	1861700	1861800	1	4813300	4813400	1	6754300	6754400	1	5588500	5588600	1	4261700	4261800	1	24780100	24780200	1	2764900	2765000	1	10924300	10924400	1	4928900	4929000	2	24022100	24022200	1	16596200	16596300	1	33586500	33586600	1	33562200	33562300	1	25624200	25624300	1	19656900	19657000	1	40793800
1	2429900	2430000	1	1871500	1871600	1	4860600	4860700	1	6821800	6821900	1	5594200	5594300	1	4262400	4262500	1	24789500	24789600	1	2774700	2774800	1	10924400	10924500	1	4960200	4960300	2	24076000	24076100	1	17324200	17324300	1	33586600	33586700	1	33562700	33562800	1	26307300	26307400	1	19669800	19669900	1	40798800
1	2430500	2430600	1	1872600	1872700	1	4861300	4861400	1	6929000	6929100	1	5594600	5594700	1	4262500	4262600	1	24876100	24876200	1	2774800	2774900	1	10924600	10924700	1	4995700	4995800	2	24132300	24132400	1	17374500	17374600	1	33586700	33586800	1	33562800	33562900	1	26743100	26743200	1	19759600	19759700	1	40798900
1	2447200	2447300	1	1872700	1872800	1	4861400	4861500	1	6931300	6931400	1	5594700	5594800	1	4262700	4262800	1	25261100	25261200	1	2846300	2846400	1	10924900	10925000	1	4998600	4998700	2	25284700	25284800	1	17512700	17512800	1	33586800	33586900	1	33563500	33563600	1	26823200	26823300	1	19760200	19760300	1	41010700
1	2458800	2458900	1	1872800	1872900	1	4861500	4861600	1	6933100	6933200	1	5595200	5595300	1	4262800	4262900	1	25261200	25261300	1	2858400	2858500	1	10925200	10925300	1	5068200	5068300	2	25284900	25285000	1	17514100	17514200	1	33586900	33587000	1	33563600	33563700	1	26823300	26823400	1	19761500	19761600	1	41010800
1	2458900	2459000	1	1874500	1874600	1	4861700	4861800	1	6933600	6933700	1	5595300	5595400	1	4263300	4263400	1	25261300	25261400	1	2861900	2862000	1	10925300	10925400	1	5109600	5109700	2	25285900	25286000	1	17514200	17514300	1	33587000	33587100	1	33564400	33564500	1	26867600	26867700	1	19772700	19772800	1	41135900
1	2471700	2471800	1	1880700	1880800	1	4864000	4864100	1	6988200	6988300	1	5596100	5596200	1	4264900	4265000	1	25286800	25286900	1	2862000	2862100	1	10925400	10925500	1	5126900	5127000	2	25502000	25502100	1	17656900	17657000	1	33587100	33587200	1	33564700	33564800	1	26867700	26867800	1	19774000	19774100	1	41136500
1	2476000	2476100	1	1883400	1883500	1	4866800	4866900	1	7070700	7070800	1	5596200	5596300	1	4265300	4265400	1	25390300	25390400	1	2882900	2883000	1	10925600	10925700	1	5127200	5127300	2	25502100	25502200	1	17716500	17716600	1	33587200	33587300	1	33567500	33567600	1	27236100	27236200	1	19863300	19863400	1	41136600
1	2476100	2476200	1	1896300	1896400	1	4867100	4867200	1	7078700	7078800	1	5596300	5596400	1	4266500	4266600	1	25533400	25533500	1	2896500	2896600	1	10925700	10925800	1	5159500	5159600	2	26130000	26130100	1	17716600	17716700	1	33587300	33587400	1	33567600	33567700	1	27236200	27236300	1	20004400	20004500	1	41605700
1	2491700	2491800	1	1947000	1947100	1	4912100	4912200	1	7110200	7110300	1	5596400	5596500	1	4279800	4279900	1	25533600	25533700	1	2896600	2896700	1	10925900	10926000	1	5159700	5159800	2	26130100	26130200	1	17766200	17766300	1	33587400	33587500	1	33567700	33567800	1	27274300	27274400	1	20768100	20768200	1	41608500
1	2491800	2491900	1	1950400	1950500	1	4928700	4928800	1	7187800	7187900	1	5596500	5596600	1	4279900	4280000	1	25544200	25544300	1	2900800	2900900	1	10926000	10926100	1	5254600	5254700	2	26259000	26259100	1	17766300	17766400	1	33587500	33587600	1	33568000	33568100	1	27282400	27282500	1	20768200	20768300	1	41609300
1	2491900	2492000	1	1950500	1950600	1	4932000	4932100	1	7257600	7257700	1	5596600	5596700	1	4350800	4350900	1	25600100	25600200	1	2902300	2902400	1	10926100	10926200	1	5254700	5254800	2	26793300	26793400	1	17911200	17911300	1	33587600	33587700	1	33568200	33568300	1	27286400	27286500	1	21003500	21003600	1	41609600
1	2492300	2492400	1	1971500	1971600	1	4941300	4941400	1	7274100	7274200	1	5597000	5597100	1	4367100	4367200	1	25701900	25702000	1	2906000	2906100	1	10926200	10926300	1	5274100	5274200	2	26793400	26793500	1	17911300	17911400	1	33587700	33587800	1	33568500	33568600	1	27647400	27647500	1	21004100	21004200	1	41729900
1	2494900	2495000	1	1974200	1974300	1	4942800	4942900	1	7299800	7299900	1	5597300	5597400	1	4442400	4442500	1	25719400	25719500	1	2906100	2906200	1	10926300	10926400	1	5303200	5303300	2	27728600	27728700	1	17919700	17919800	1	33587800	33587900	1	33568800	33568900	1	27749200	27749300	1	21004200	21004300	1	42024100
1	2495000	2495100	1	1987500	1987600	1	4942900	4943000	1	7299900	7300000	1	5597400	5597500	1	4482600	4482700	1	25817600	25817700	1	2906500	2906600	1	10926400	10926500	1	5375700	5375800	2	27728700	27728800	1	18049200	18049300	1	33587900	33588000	1	33569000	33569100	1	28130400	28130500	1	21004300	21004400	1	42318200
1	2496300	2496400	1	1987900	1988000	1	4947800	4947900	1	7306000	7306100	1	5597500	5597600	1	4482700	4482800	1	25817700	25817800	1	2961700	2961800	1	10926500	10926600	1	5441600	5441700	2	27731300	27731400	1	18049300	18049400	1	33588000	33588100	1	33569300	33569400	1	28144500	28144600	1	21050100	21050200	1	42625400
1	2496400	2496500	1	1988200	1988300	1	4947900	4948000	1	7307500	7307600	1	5598600	5598700	1	4482800	4482900	1	25822900	25823000	1	2989500	2989600	1	10926600	10926700	1	5463300	5463400	2	27862500	27862600	1	18064400	18064500	1	33588100	33588200	1	33569400	33569500	1	28144600	28144700	1	21050200	21050300	1	42634400
1	2496500	2496600	1	1988300	1988400	1	4948000	4948100	1	7500600	7500700	1	5598700	5598800	1	4482900	4483000	1	26051500	26051600	1	2989600	2989700	1	10926700	10926800	1	5485600	5485700	2	27865000	27865100	1	18064500	18064600	1	33588200	33588300	1	33569600	33569700	1	28381700	28381800	1	21218900	21219000	1	42634500
1	2496900	2497000	1	1990600	1990700	1	4975700	4975800	1	7525100	7525200	1	5601900	5602000	1	4483000	4483100	1	26094200	26094300	1	2989700	2989800	1	10926800	10926900	1	5485800	5485900	2	28008700	28008800	1	18132900	18133000	1	33588400	33588500	1	33569700	33569800	1	28381800	28381900	1	21219300	21219400	1	42734100
1	2497000	2497100	1	1991700	1991800	1	4998600	4998700	1	7570800	7570900	1	5602000	5602100	1	4483100	4483200	1	26131000	26131100	1	2990100	2990200	1	10926900	10927000	1	5489900	5490000	2	28046600	28046700	1	18133700	18133800	1	33588700	33588800	1	33569800	33569900	1	28381900	28382000	1	21219400	21219500	1	42734200
1	2499500	2499600	1	1998700	1998800	1	5051500	5051600	1	7589200	7589300	1	5602100	5602200	1	4483300	4483400	1	26131100	26131200	1	2997200	2997300	1	10927000	10927100	1	5521800	5521900	2	28716600	28716700	1	18133800	18133900	1	33588800	33588900	1	33570000	33570100	1	28382000	28382100	1	21219600	21219700	1	43019800
1	2511800	2511900	1	1999800	1999900	1	5060900	5061000	1	7613100	7613200	1	5602200	5602300	1	4550800	4550900	1	26303500	26303600	1	2997700	2997800	1	10927100	10927200	1	5551700	5551800	2	28741800	28741900	1	18158000	18158100	1	33589100	33589200	1	33570200	33570300	1	28382100	28382200	1	21294600	21294700	2	634000
1	2511900	2512000	1	1999900	2000000	1	5086600	5086700	1	7621200	7621300	1	5602500	5602600	1	4551600	4551700	1	26426400	26426500	1	2997800	2997900	1	10927200	10927300	1	5572000	5572100	2	28865700	28865800	1	18202800	18202900	1	33589400	33589500	1	33570300	33570400	1	28382200	28382300	1	21295000	21295100	2	634100
1	2522000	2522100	1	2005900	2006000	1	5124900	5125000	1	7788000	7788100	1	5602600	5602700	1	4552300	4552400	1	26437900	26438000	1	2999800	2999900	1	10927300	10927400	1	5580100	5580200	2	28872100	28872200	1	18337800	18337900	1	34130200	34130300	1	33571000	33571100	1	28505100	28505200	1	21295700	21295800	2	634600
1	2522100	2522200	1	2008000	2008100	1	5126900	5127000	1	7788100	7788200	1	5602800	5602900	1	4552700	4552800	1	26581000	26581100	1	3007400	3007500	1	10927400	10927500	1	5580600	5580700	2	29244300	29244400	1	18337900	18338000	1	34131600	34131700	1	33571100	33571200	1	28785200	28785300	1	21296400	21296500	2	782600
1	2522200	2522300	1	2014200	2014300	1	5127200	5127300	1	7789000	7789100	1	5602900	5603000	1	4553500	4553600	1	26679100	26679200	1	3007500	3007600	1	10927500	10927600	1	5580900	5581000	2	29254600	29254700	1	18525600	18525700	1	34372000	34372100	1	33571600	33571700	1	29102400	29102500	1	21552500	21552600	2	783600
1	2539900	2540000	1	2014300	2014400	1	5172000	5172100	1	7815800	7815900	1	5603000	5603100	1	4553900	4554000	1	26679200	26679300	1	3028200	3028300	1	10927800	10927900	1	5581000	5581100	2	30411600	30411700	1	18946300	18946400	1	34372900	34373000	1	33571700	33571800	1	29176500	29176600	1	21607300	21607400	2	783800
1	2543600	2543700	1	2020600	2020700	1	5181700	5181800	1	7823800	7823900	1	5604900	5605000	1	4554000	4554100	1	26695700	26695800	1	3074700	3074800	1	11041400	11041500	1	5581100	5581200	2	30510200	30510300	1	19040200	19040300	1	34373900	34374000	1	33578500	33578600	1	29213400	29213500	1	21607400	21607500	2	783900
1	2546300	2546400	1	2023400	2023500	1	5184400	5184500	1	7827700	7827800	1	5605100	5605200	1	4554200	4554300	1	26695800	26695900	1	3074800	3074900	1	11132600	11132700	1	5581200	5581300	2	30822500	30822600	1	19050800	19050900	1	34374600	34374700	1	33582000	33582100	1	29213500	29213600	1	22054900	22055000	2	784300
1	2551500	2551600	1	2023500	2023600	1	5186200	5186300	1	7827800	7827900	1	5605400	5605500	1	4554300	4554400	1	26695900	26696000	1	3085400	3085500	1	11189200	11189300	1	5581300	5581400	2	30822600	30822700	1	19067900	19068000	1	34578400	34578500	1	33582100	33582200	1	29213600	29213700	1	22055200	22055300	2	784400
1	2553000	2553100	1	2023600	2023700	1	5254600	5254700	1	7827900	7828000	1	5605500	5605600	1	4554400	4554500	1	26704000	26704100	1	3154800	3154900	1	11189300	11189400	1	5581600	5581700	2	31701500	31701600	1	19134900	19135000	1	35189000	35189100	1	33582300	33582400	1	29213700	29213800	1	22222200	22222300	2	808200
1	2557300	2557400	1	2025100	2025200	1	5254700	5254800	1	7828000	7828100	1	5605700	5605800	1	4554600	4554700	1	26743100	26743200	1	3194000	3194100	1	11189400	11189500	1	5581700	5581800	2	32435100	32435200	1	19194100	19194200	1	35189100	35189200	1	33586500	33586600	1	29213800	29213900	1	22222300	22222400	2	811700
1	2558700	2558800	1	2033300	2033400	1	5303200	5303300	1	7828100	7828200	1	5606100	5606200	1	4558900	4559000	1	26743200	26743300	1	3194100	3194200	1	11190000	11190100	1	5582300	5582400	2	32435200	32435300	1	19333400	19333500	1	35485000	35485100	1	33586600	33586700	1	29213900	29214000	1	22222500	22222600	2	811900
1	2579000	2579100	1	2048200	2048300	1	5308800	5308900	1	7830300	7830400	1	5606200	5606300	1	4559000	4559100	1	26759900	26760000	1	3220900	3221000	1	11190100	11190200	1	5582900	5583000	2	32533800	32533900	1	19410200	19410300	1	35798400	35798500	1	33586700	33586800	1	29214100	29214200	1	22233900	22234000	2	814700
1	2579100	2579200	1	2098000	2098100	1	5308900	5309000	1	7830400	7830500	1	5606300	5606400	1	4559100	4559200	1	26848300	26848400	1	3221000	3221100	1	11190300	11190400	1	5583100	5583200	2	32533900	32534000	1	19480300	19480400	1	35798500	35798600	1	33586800	33586900	1	29837500	29837600	1	22234000	22234100	2	814900
1	2624500	2624600	1	2104500	2104600	1	5358100	5358200	1	7830900	7831000	1	5622000	5622100	1	4559300	4559400	1	26974200	26974300	1	3239600	3239700	1	11190800	11190900	1	5587500	5587600	2	32683700	32683800	1	19862500	19862600	1	36016400	36016500	1	33586900	33587000	1	29885500	29885600	1	22234100	22234200	2	815200
1	2630300	2630400	1	2110500	2110600	1	5373300	5373400	1	7837700	7837800	1	5786300	5786400	1	4639700	4639800	1	27017200	27017300	1	3240900	3241000	1	11195600	11195700	1	5595500	5595600	2	32841700	32841800	1	19902300	19902400	1	36199000	36199100	1	33587000	33587100	1	29885600	29885700	1	22234200	22234300	2	815300
1	2656100	2656200	1	2118500	2118600	1	5451800	5451900	1	7868000	7868100	1	5786400	5786500	1	4776600	4776700	1	27435900	27436000	1	3241000	3241100	1	11195700	11195800	1	5595700	5595800	2	32879800	32879900	1	20231900	20232000	1	36199100	36199200	1	33587100	33587200	1	30142600	30142700	1	22234300	22234400	2	815400
1	2659200	2659300	1	2119300	2119400	1	5463100	5463200	1	7872900	7873000	1	5903600	5903700	1	4777200	4777300	1	27478100	27478200	1	3245600	3245700	1	11196000	11196100	1	5595800	5595900	2	32879900	32880000	1	20294700	20294800	1	36501200	36501300	1	33587200	33587300	1	30142700	30142800	1	22248600	22248700	2	816000
1	2718600	2718700	1	2129200	2129300	1	5484500	5484600	1	7977100	7977200	1	5903700	5903800	1	4777500	4777600	1	27529100	27529200	1	3245700	3245800	1	11196100	11196200	1	5595900	5596000	2	34280300	34280400	1	20453900	20454000	1	36574100	36574200	1	33587300	33587400	1	30223200	30223300	1	22248700	22248800	2	839100
1	2745000	2745100	1	2129500	2129600	1	5501500	5501600	1	7977200	7977300	1	5903900	5904000	1	4777700	4777800	1	27539300	27539400	1	3269200	3269300	1	11196200	11196300	1	5596200	5596300	2	34280400	34280500	1	20914200	20914300	1	36583400	36583500	1	33587400	33587500	1	30244000	30244100	1	22248800	22248900	2	839200
1	2774700	2774800	1	2129600	2129700	1	5557600	5557700	1	7977500	7977600	1	5906500	5906600	1	4778100	4778200	1	27662200	27662300	1	3390900	3391000	1	11196300	11196400	1	5596300	5596400	2	34720700	34720800	1	20914300	20914400	1	36583500	36583600	1	33587500	33587600	1	30735200	30735300	1	22249000	22249100	2	839400
1	2798200	2798300	1	2143000	2143100	1	5557800	5557900	1	7991200	7991300	1	5975700	5975800	1	4778300	4778400	1	27819400	27819500	1	3391300	3391400	1	11196400	11196500	1	5602600	5602700	2	34976100	34976200	1	20949700	20949800	1	36651700	36651800	1	33587600	33587700	1	30909400	30909500	1	22249100	22249200	2	839600
1	2862000	2862100	1	2145000	2145100	1	5558000	5558100	1	8165300	8165400	1	6043100	6043200	1	4778400	4778500	1	27819500	27819600	1	3403400	3403500	1	11196500	11196600	1	5607300	5607400	3	268200	268300	1	20960000	20960100	1	37231300	37231400	1	33587700	33587800	1	30909500	30909600	1	22249200	22249300	2	840500
1	2882700	2882800	1	2145100	2145200	1	5607300	5607400	1	8219800	8219900	1	6048700	6048800	1	4778500	4778600	1	27907300	27907400	1	3403500	3403600	1	11197200	11197300	1	5620700	5620800	3	915900	916000	1	20985300	20985400	1	37415300	37415400	1	33587800	33587900	1	30909600	30909700	1	22249300	22249400	2	841200
1	2882800	2882900	1	2145600	2145700	1	5620400	5620500	1	8244300	8244400	1	6050300	6050400	1	4778600	4778700	1	28010900	28011000	1	3403600	3403700	1	11197300	11197400	1	5632000	5632100	3	916000	916100	1	21077600	21077700	1	37439600	37439700	1	33587900	33588000	1	30909700	30909800	1	22249400	22249500	2	1480500
1	2902300	2902400	1	2145700	2145800	1	5622000	5622100	1	8340100	8340200	1	6050400	6050500	1	4778700	4778800	1	28144600	28144700	1	3411100	3411200	1	11197400	11197500	1	5637600	5637700	3	916100	916200	1	21101600	21101700	1	38133300	38133400	1	33588000	33588100	1	30909800	30909900	1	22249500	22249600	2	1797400
1	2906100	2906200	1	2145800	2145900	1	5637600	5637700	1	8340200	8340300	1	6050500	6050600	1	4779400	4779500	1	28161200	28161300	1	3420200	3420300	1	11197600	11197700	1	5638500	5638600	3	921400	921500	1	21258700	21258800	1	38269800	38269900	1	33588100	33588200	1	30909900	30910000	1	22269400	22269500	2	1798000
1	2906500	2906600	1	2173500	2173600	1	5638600	5638700	1	8341300	8341400	1	6050800	6050900	1	4779500	4779600	1	28344900	28345000	1	3436800	3436900	1	11197700	11197800	1	5638600	5638700	3	1106700	1106800	1	21260900	21261000	1	38270400	38270500	1	33588200	33588300	1	31132800	31132900	1	22444200	22444300	2	2861500
1	2908200	2908300	1	2186000	2186100	1	5660200	5660300	1	8360100	8360200	1	6050900	6051000	1	4779700	4779800	1	28345000	28345100	1	3438000	3438100	1	11197800	11197900	1	5656100	5656200	3	1464300	1464400	1	21429100	21429200	1	38270500	38270600	1	33588300	33588400	1	31132900	31133000	1	22736100	22736200	2	2861600
1	2940500	2940600	1	2223700	2223800	1	5709900	5710000	1	8457800	8457900	1	6051100	6051200	1	4780000	4780100	1	28810800	28810900	1	3438500	3438600	1	11197900	11198000	1	5657100	5657200	3	2527400	2527500	1	21443700	21443800	1	38430400	38430500	1	33588400	33588500	1	31868900	31869000	1	22796700	22796800	2	3196100
1	2941800	2941900	1	2232200	2232300	1	5772800	5772900	1	8458000	8458100	1	6051200	6051300	1	4780100	4780200	1	28814900	28815000	1	3438600	3438700	1	11198000	11198100	1	5688000	5688100	3	2955200	2955300	1	21504300	21504400	1	38495600	38495700	1	33588700	33588800	1	31956900	31957000	1	22807500	22807600	2	3196200
1	2941900	2942000	1	2232300	2232400	1	5772900	5773000	1	8458600	8458700	1	6051300	6051400	1	4780800	4780900	1	28815000	28815100	1	3439200	3439300	1	11198100	11198200	1	5747300	5747400	3	3086600	3086700	1	21574100	21574200	1	38735400	38735500	1	33588800	33588900	1	32339200	32339300	1	22815600	22815700	2	3196300
1	2942600	2942700	1	2237300	2237400	1	5917600	5917700	1	8459900	8460000	1	6064600	6064700	1	4813300	4813400	1	29062600	29062700	1	3456600	3456700	1	11198200	11198300	1	5752600	5752700	3	3329200	3329300	1	21636100	21636200	1	38735500	38735600	1	33589000	33589100	1	32339800	32339900	1	22815700	22815800	2	3233700
1	2945800	2945900	1	2258300	2258400	1	5928300	5928400	1	8460000	8460100	1	6064700	6064800	1	4932500	4932600	1	29139700	29139800	1	3482000	3482100	1	11198300	11198400	1	5752700	5752800	3	3337000	3337100	1	21690200	21690300	1	38966600	38966700	1	33589100	33589200	1	32457200	32457300	1	22942100	22942200	2	3233800
1	2955700	2955800	1	2258400	2258500	1	5999700	5999800	1	8460100	8460200	1	6064800	6064900	1	4932600	4932700	1	29165600	29165700	1	3485500	3485600	1	11198800	11198900	1	5753200	5753300	3	3487700	3487800	1	21692100	21692200	1	39117200	39117300	1	33589400	33589500	1	32458000	32458100	1	22942200	22942300	2	3233900
1	2961700	2961800	1	2274900	2275000	1	6014400	6014500	1	8460700	8460800	1	6065000	6065100	1	4932700	4932800	1	29199300	29199400	1	3487100	3487200	1	11198900	11199000	1	5753300	5753400	3	4467400	4467500	1	22091300	22091400	1	39122000	39122100	1	34372000	34372100	1	32458100	32458200	1	22942300	22942400	2	3322100
1	2962000	2962100	1	2289800	2289900	1	6043100	6043200	1	8473300	8473400	1	6065200	6065300	1	4932800	4932900	1	29212300	29212400	1	3494100	3494200	1	11199000	11199100	1	5772800	5772900	3	4495500	4495600	1	22269900	22270000	1	39123300	39123400	1	34372900	34373000	1	32686000	32686100	1	22942400	22942500	2	3340700
1	2962100	2962200	1	2291500	2291600	1	6043500	6043600	1	8637300	8637400	1	6645900	6646000	1	4932900	4933000	1	29212400	29212500	1	3494200	3494300	1	11199100	11199200	1	5875500	5875600	3	4766400	4766500	1	22303400	22303500	1	39306600	39306700	1	34578400	34578500	1	33153100	33153200	1	22942500	22942600	2	3410900
1	2972500	2972600	1	2315800	2315900	1	6048700	6048800	1	8669900	8670000	1	6726700	6726800	1	4933000	4933100	1	29212500	29212600	1	3494300	3494400	1	11199400	11199500	1	5917300	5917400	3	5504300	5504400	1	22378800	22378900	1	39637100	39637200	1	34942500	34942600	1	33153200	33153300	1	23132400	23132500	2	3623200
1	2972600	2972700	1	2319300	2319400	1	6062500	6062600	1	8670000	8670100	1	6851400	6851500	1	4933100	4933200	1	29222400	29222500	1	3497700	3497800	1	11361300	11361400	1	5917600	5917700	3	6084900	6085000	1	22426300	22426400	1	39847800	39847900	1	35485000	35485100	1	33342600	33342700	1	23132500	23132600	2	4195700
1	3007400	3007500	1	2353900	2354000	1	6062600	6062700	1	8673700	8673800	1	6865200	6865300	1	4933200	4933300	1	29222500	29222600	1	3541100	3541200	1	11361400	11361500	1	5917700	5917800	3	6207000	6207100	1	22426400	22426500	1	41010700	41010800	1	35798400	35798500	1	33505900	33506000	1	23133100	23133200	2	4371800
1	3019300	3019400	1	2354000	2354100	1	6097400	6097500	1	8674700	8674800	1	6865300	6865400	1	4933400	4933500	1	29598400	29598500	1	3541300	3541400	1	11361600	11361700	1	5923300	5923400	3	6212400	6212500	1	22445900	22446000	1	41594000	41594100	1	35798500	35798600	1	33506200	33506300	1	23141900	23142000	2	4371900
1	3074000	3074100	1	2383200	2383300	1	6165900	6166000	1	8678000	8678100	1	6994200	6994300	1	4948000	4948100	1	29598600	29598700	1	3541400	3541500	1	11361700	11361800	1	5958300	5958400	3	6466100	6466200	1	22487300	22487400	1	41827500	41827600	1	35801500	35801600	1	33506300	33506400	1	23150800	23150900	2	4372000
1	3074700	3074800	1	2383300	2383400	1	6323300	6323400	1	8814100	8814200	1	7051500	7051600	1	5051200	5051300	1	29636200	29636300	1	3567600	3567700	1	11361800	11361900	1	5958400	5958500	3	6513600	6513700	1	22561700	22561800	1	42284500	42284600	1	35875900	35876000	1	33506400	33506500	1	23150900	23151000	2	4523800
1	3074800	3074900	1	2383400	2383500	1	6420800	6420900	1	8869100	8869200	1	7051600	7051700	1	5051300	5051400	1	29636300	29636400	1	3580300	3580400	1	11361900	11362000	1	6014400	6014500	3	8136600	8136700	1	22588500	22588600	1	42357100	42357200	1	36016400	36016500	1	33506500	33506600	1	23151000	23151100	2	4523900
1	3077500	3077600	1	2383500	2383600	1	6441200	6441300	1	8870900	8871000	1	7089900	7090000	1	5051500	5051600	1	29712200	29712300	1	3586600	3586700	1	11362000	11362100	1	6043100	6043200	3	9165100	9165200	1	22690700	22690800	1	43020700	43020800	1	36115200	36115300	1	33506600	33506700	1	23151100	23151200	2	4554800
1	3078000	3078100	1	2410100	2410200	1	6539700	6539800	1	8873300	8873400	1	7153400	7153500	1	5056800	5056900	1	29931600	29931700	1	3594000	3594100	1	11362100	11362200	1	6044800	6044900	3	9240100	9240200	1	22710500	22710600	2	634000	634100	1	37072200	37072300	1	33506700	33506800	1	24373500	24373600	2	4554900
1	3095400	3095500	1	2410200	2410300	1	6579300	6579400	1	8874500	8874600	1	7153500	7153600	1	5080300	5080400	1	29931700	29931800	1	3596300	3596400	1	11362200	11362300	1	6044900	6045000	3	9427100	9427200	1	22710600	22710700	2	780000	780100	1	37221800	37221900	1	33506800	33506900	1	24615700	24615800	2	5215200
1	3141200	3141300	1	2410300	2410400	1	6579400	6579500	1	9030200	9030300	1	7153700	7153800	1	5104600	5104700	1	29931800	29931900	1	3597700	3597800	1	11362300	11362400	1	6064700	6064800	3	9444200	9444300	1	22765500	22765600	2	807600	807700	1	37415200	37415300	1	33506900	33507000	1	24615800	24615900	2	5232100
1	3141300	3141400	1	2429900	2430000	1	6722000	6722100	1	9030300	9030400	1	7153900	7154000	1	5127400	5127500	1	29931900	29932000	1	3606800	3606900	1	11362400	11362500	1	6065200	6065300	3	9569000	9569100	1	22875400	22875500	2	807700	807800	1	37415300	37415400	1	33507000	33507100	1	25326300	25326400	2	5232200
1	3143400	3143500	1	2432400	2432500	1	6731800	6731900	1	9030400	9030500	1	7154000	7154100	1	5182300	5182400	1	30385300	30385400	1	3606900	3607000	1	11362500	11362600	1	6067300	6067400	3	10015800	10015900	1	23220700	23220800	2	807800	807900	1	37693600	37693700	1	33512400	33512500	1	25329400	25329500	2	5232300
1	3143500	3143600	1	2445300	2445400	1	6754300	6754400	1	9030500	9030600	1	7154200	7154300	1	5182500	5182600	1	30445800	30445900	1	3616300	3616400	1	11362600	11362700	1	6068900	6069000	3	10015900	10016000	1	23220800	23220900	2	807900	808000	1	38133300	38133400	1	33532200	33532300	1	25329800	25329900	2	5250000
1	3194100	3194200	1	2446700	2446800	1	6819600	6819700	1	9030600	9030700	1	7154800	7154900	1	5194200	5194300	1	30644400	30644500	1	3617000	3617100	1	11362700	11362800	1	6074500	6074600	3	11065100	11065200	1	23328200	23328300	2	808000	808100	1	38256200	38256300	1	33532300	33532400	1	25556600	25556700	2	5250100
1	3220800	3220900	1	2447200	2447300	1	6833800	6833900	1	9030700	9030800	1	7160200	7160300	1	5232900	5233000	1	30644500	30644600	1	3617300	3617400	1	11362800	11362900	1	6074600	6074700	3	11157800	11157900	1	23332500	23332600	2	808100	808200	1	38269800	38269900	1	33532400	33532500	1	25568900	25569000	2	5301400
1	3228500	3228600	1	2458800	2458900	1	6851400	6851500	1	9030800	9030900	1	7160300	7160400	1	5234100	5234200	1	30683000	30683100	1	3617400	3617500	1	11362900	11363000	1	6097500	6097600	3	11276200	11276300	1	23332600	23332700	2	808200	808300	1	38270000	38270100	1	33533100	33533200	1	25678200	25678300	2	5508500
1	3234400	3234500	1	2458900	2459000	1	6929000	6929100	1	9030900	9031000	1	7160400	7160500	1	5234200	5234300	1	30702400	30702500	1	3625600	3625700	1	11363000	11363100	1	6098300	6098400	3	11276300	11276400	1	23355300	23355400	2	811400	811500	1	38270200	38270300	1	33544700	33544800	1	25731600	25731700	2	5508600
1	3234500	3234600	1	2471700	2471800	1	6929200	6929300	1	9031000	9031100	1	7160500	7160600	1	5254600	5254700	1	30787100	30787200	1	3723400	3723500	1	11363200	11363300	1	6098800	6098900	3	11276400	11276500	1	23363600	23363700	2	811600	811700	1	38270400	38270500	1	33544800	33544900	1	25732500	25732600	2	5509200
1	3240900	3241000	1	2476000	2476100	1	6929800	6929900	1	9031100	9031200	1	7160600	7160700	1	5254700	5254800	1	30977600	30977700	1	3723500	3723600	1	11363300	11363400	1	6099700	6099800	3	12409200	12409300	1	23383600	23383700	2	811700	811800	1	38270500	38270600	1	33544900	33545000	1	25811700	25811800	2	5569800
1	3245600	3245700	1	2476100	2476200	1	6930300	6930400	1	9031500	9031600	1	7160700	7160800	1	5274100	5274200	1	31039200	31039300	1	3729500	3729600	1	11363400	11363500	1	6206700	6206800	3	12521300	12521400	1	23521700	23521800	2	811800	811900	1	38272500	38272600	1	33545000	33545100	1	25812500	25812600	2	5569900
1	3245700	3245800	1	2492400	2492500	1	6932700	6932800	1	9031700	9031800	1	7160800	7160900	1	5363600	5363700	1	31258100	31258200	1	3729700	3729800	1	11363500	11363600	1	6238500	6238600	3	12584600	12584700	1	23643500	23643600	2	811900	812000	1	38430400	38430500	1	33545100	33545200	1	25812700	25812800	2	5736800
1	3269200	3269300	1	2494900	2495000	1	6933600	6933700	1	9031800	9031900	1	7160900	7161000	1	5451800	5451900	1	31429600	31429700	1	3729800	3729900	1	11363600	11363700	1	6246700	6246800	3	12735800	12735900	1	23707900	23708000	2	812000	812100	1	38495600	38495700	1	33545200	33545300	1	25997400	25997500	2	5736900
1	3271500	3271600	1	2495000	2495100	1	6934500	6934600	1	9032800	9032900	1	7161000	7161100	1	5463100	5463200	1	31631700	31631800	1	3729900	3730000	1	11469600	11469700	1	6246800	6246900	3	13132600	13132700	1	23843800	23843900	2	812100	812200	1	38565500	38565600	1	33545300	33545400	1	26041100	26041200	2	5737100
1	3337000	3337100	1	2496300	2496400	1	6949200	6949300	1	9032900	9033000	1	7161100	7161200	1	5463400	5463500	1	31692900	31693000	1	3744700	3744800	1	11469700	11469800	1	6263500	6263600	3	13938400	13938500	1	23894600	23894700	2	814400	814500	1	38735400	38735500	1	33545400	33545500	1	26192300	26192400	2	5737200
1	3361600	3361700	1	2496400	2496500	1	6977000	6977100	1	9033000	9033100	1	7161200	7161300	1	5473100	5473200	1	31848100	31848200	1	3748500	3748600	1	11470400	11470500	1	6302900	6303000	3	14034600	14034700	1	23926700	23926800	2	814500	814600	1	38859200	38859300	1	33545500	33545600	1	26552800	26552900	2	5737300
1	3380200	3380300	1	2496500	2496600	1	6978700	6978800	1	9033100	9033200	1	7161300	7161400	1	5481300	5481400	1	32090700	32090800	1	3760500	3760600	1	11470900	11471000	1	6308200	6308300	3	14034700	14034800	1	24031700	24031800	2	814600	814700	1	39122000	39122100	1	33545600	33545700	1	26572900	26573000	2	5737500
1	3380300	3380400	1	2496900	2497000	1	6992300	6992400	1	9033200	9033300	1	7161400	7161500	1	5485200	5485300	1	32090800	32090900	1	3763400	3763500	1	11471100	11471200	1	6356000	6356100	3	14273900	14274000	1	24096700	24096800	2	814700	814800	1	39122100	39122200	1	33553000	33553100	1	26661900	26662000	2	5738000
1	3400900	3401000	1	2497000	2497100	1	6992400	6992500	1	9033300	9033400	1	7161500	7161600	1	5485700	5485800	1	32263400	32263500	1	3774200	3774300	1	11471200	11471300	1	6356100	6356200	3	14416800	14416900	1	24097000	24097100	2	814800	814900	1	39123300	39123400	1	33554100	33554200	1	26823200	26823300	2	5738100
1	3401000	3401100	1	2499500	2499600	1	6993400	6993500	1	9033400	9033500	1	7161600	7161700	1	5485800	5485900	1	32263500	32263600	1	3774300	3774400	1	11471300	11471400	1	6416000	6416100	3	14416900	14417000	1	24115900	24116000	2	814900	815000	1	39247200	39247300	1	33563600	33563700	1	26823300	26823400	2	6155700
1	3411100	3411200	1	2503900	2504000	1	7078800	7078900	1	9033500	9033600	1	7161700	7161800	1	5486000	5486100	1	32421000	32421100	1	3777900	3778000	1	11471400	11471500	1	6417200	6417300	3	14738600	14738700	1	24372400	24372500	2	815000	815100	1	39847800	39847900	1	33586500	33586600	1	26946400	26946500	2	6155800
1	3420200	3420300	1	2504900	2505000	1	7114700	7114800	1	9033600	9033700	1	7161800	7161900	1	5486100	5486200	1	32421100	32421200	1	3778000	3778100	1	11471500	11471600	1	6434000	6434100	3	15294800	15294900	1	24388400	24388500	2	815100	815200	1	40086100	40086200	1	33586600	33586700	1	26946600	26946700	2	6404100
1	3441800	3441900	1	2511800	2511900	1	7114800	7114900	1	9033700	9033800	1	7161900	7162000	1	5578400	5578500	1	32496200	32496300	1	3798600	3798700	1	11471600	11471700	1	6434100	6434200	3	15294900	15295000	1	24469300	24469400	2	815200	815300	1	40648500	40648600	1	33586700	33586800	1	26947400	26947500	2	6405300
1	3481900	3482000	1	2511900	2512000	1	7138200	7138300	1	9033800	9033900	1	7162000	7162100	1	5578700	5578800	1	32500800	32500900	1	3798700	3798800	1	11471700	11471800	1	6441000	6441100	3	16398400	16398500	1	24469400	24469500	2	815300	815400	1	41010700	41010800	1	33586800	33586900	1	27236100	27236200	2	6696200
1	3482000	3482100	1	2519300	2519400	1	7246100	7246200	1	9033900	9034000	1	7162100	7162200	1	5578800	5578900	1	32576600	32576700	1	3884400	3884500	1	11471800	11471900	1	6441100	6441200	3	16509200	16509300	1	24607600	24607700	2	815400	815500	1	41135900	41136000	1	33586900	33587000	1	27236200	27236300	2	6696300
1	3492800	3492900	1	2522000	2522100	1	7274100	7274200	1	9034000	9034100	1	7162200	7162300	1	5579000	5579100	1	32603300	32603400	1	3892600	3892700	1	11471900	11472000	1	6441200	6441300	3	16532200	16532300	1	24701500	24701600	2	815500	815600	1	41136500	41136600	1	33587000	33587100	1	27467400	27467500	2	7622300
1	3494100	3494200	1	2522100	2522200	1	7305800	7305900	1	9034100	9034200	1	7162700	7162800	1	5579100	5579200	1	32802600	32802700	1	3902400	3902500	1	11472000	11472100	1	6477500	6477600	3	16532300	16532400	1	24780100	24780200	2	815600	815700	1	41136600	41136700	1	33587100	33587200	1	27749200	27749300	2	7622400
1	3494300	3494400	1	2522200	2522300	1	7305900	7306000	1	9034200	9034300	1	7163200	7163300	1	5579300	5579400	1	32802700	32802800	1	3902500	3902600	1	11472100	11472200	1	6559700	6559800	3	16548400	16548500	1	24789500	24789600	2	815800	815900	1	41209300	41209400	1	33587200	33587300	1	27820300	27820400	2	7947600
1	3532000	3532100	1	2526300	2526400	1	7306000	7306100	1	9034400	9034500	1	7163300	7163400	1	5579400	5579500	1	33015300	33015400	1	3909000	3909100	1	11472200	11472300	1	6559800	6559900	3	17204600	17204700	1	25182000	25182100	2	816000	816100	1	42300400	42300500	1	33587300	33587400	1	28130300	28130400	2	8057800
1	3540400	3540500	1	2531700	2531800	1	7314700	7314800	1	9034500	9034600	1	7164000	7164100	1	5579600	5579700	1	33202800	33202900	1	3916900	3917000	1	11472300	11472400	1	6559900	6560000	3	17576000	17576100	1	25242100	25242200	2	816100	816200	1	42357100	42357200	1	33587400	33587500	1	28130400	28130500	2	8057900
1	3543100	3543200	1	2531800	2531900	1	7428500	7428600	1	9040100	9040200	1	7164100	7164200	1	5579700	5579800	1	33447300	33447400	1	3917000	3917100	1	11472600	11472700	1	6602600	6602700	3	17761700	17761800	1	25242900	25243000	2	816400	816500	1	42734100	42734200	1	33587500	33587600	1	28144500	28144600	2	8058200
1	3547200	3547300	1	2539800	2539900	1	7515900	7516000	1	9040200	9040300	1	7164700	7164800	1	5579800	5579900	1	33447400	33447500	1	3917100	3917200	1	11472700	11472800	1	6619500	6619600	3	17761900	17762000	1	25261100	25261200	2	862200	862300	1	42734200	42734300	1	33587800	33587900	1	28144600	28144700	2	8058300
1	3567600	3567700	1	2539900	2540000	1	7563500	7563600	1	9040300	9040400	1	7165000	7165100	1	5579900	5580000	1	33952700	33952800	1	3924100	3924200	1	11472800	11472900	1	6731800	6731900	3	17767400	17767500	1	25286800	25286900	2	862300	862400	1	42793100	42793200	1	33587900	33588000	1	28381700	28381800	2	8058500
1	3577200	3577300	1	2543700	2543800	1	7589200	7589300	1	9040600	9040700	1	7165100	7165200	1	5580000	5580100	1	34066500	34066600	1	3946400	3946500	1	11472900	11473000	1	6731900	6732000	3	17985000	17985100	1	25286900	25287000	2	1025200	1025300	1	43020700	43020800	1	33588000	33588100	1	28381800	28381900	2	8058600
1	3596300	3596400	1	2543800	2543900	1	7613100	7613200	1	9040700	9040800	1	7165200	7165300	1	5580100	5580200	1	34160700	34160800	1	3950400	3950500	1	11473200	11473300	1	6883000	6883100	3	18308800	18308900	1	25287000	25287100	2	1116600	1116700	1	43025600	43025700	1	33588100	33588200	1	28381900	28382000	2	8058700
1	3606900	3607000	1	2546100	2546200	1	7621200	7621300	1	9040900	9041000	1	7165300	7165400	1	5580200	5580300	1	34288800	34288900	1	3964700	3964800	1	11473300	11473400	1	6905700	6905800	3	18308900	18309000	1	25287100	25287200	2	1116700	1116800	1	43025700	43025800	1	33588300	33588400	1	28382000	28382100	2	8058800
1	3617000	3617100	1	2546200	2546300	1	7715400	7715500	1	9041000	9041100	1	7165400	7165500	1	5580300	5580400	1	34288900	34289000	1	3967100	3967200	1	11473600	11473700	1	6949200	6949300	3	19888000	19888100	1	25350100	25350200	2	1116800	1116900	1	43143500	43143600	1	33588400	33588500	1	28382100	28382200	2	8058900
1	3636900	3637000	1	2546300	2546400	1	7726200	7726300	1	9041100	9041200	1	7165500	7165600	1	5580400	5580500	1	34289800	34289900	1	3972200	3972300	1	11473700	11473800	1	6954600	6954700	3	19888100	19888200	1	25382500	25382600	2	1685500	1685600	1	43149000	43149100	1	33588700	33588800	1	28382200	28382300	2	8059100
1	3637000	3637100	1	2549400	2549500	1	7727700	7727800	1	9041200	9041300	1	7165600	7165700	1	5580500	5580600	1	34289900	34290000	1	3972300	3972400	1	11473800	11473900	1	6954700	6954800	3	21026600	21026700	1	25533600	25533700	2	1685600	1685700	1	43149100	43149200	1	34053900	34054000	1	28784000	28784100	2	8059200
1	3637100	3637200	1	2553000	2553100	1	7746200	7746300	1	9041500	9041600	1	7165700	7165800	1	5580600	5580700	1	34427600	34427700	1	4011600	4011700	1	11473900	11474000	1	6954900	6955000	3	21360400	21360500	1	25547700	25547800	2	1797400	1797500	1	43199600	43199700	1	34219500	34219600	1	28784100	28784200	2	8059300
1	3637200	3637300	1	2553100	2553200	1	7760900	7761000	1	9041600	9041700	1	7165800	7165900	1	5580700	5580800	1	34507600	34507700	1	4022200	4022300	1	11474000	11474100	1	6955000	6955100	3	21360500	21360600	1	25578400	25578500	2	2604700	2604800	2	780000	780100	1	34222400	34222500	1	28784500	28784600	2	8401700
1	3640300	3640400	1	2556000	2556100	1	7761000	7761100	1	9041700	9041800	1	7165900	7166000	1	5580800	5580900	1	34547800	34547900	1	4022600	4022700	1	11474100	11474200	1	6977000	6977100	3	21772500	21772600	1	25591500	25591600	2	3196100	3196200	2	782600	782700	1	34222500	34222600	1	29213500	29213600	2	8402200
1	3723500	3723600	1	2558700	2558800	1	7787200	7787300	1	9041900	9042000	1	7166000	7166100	1	5580900	5581000	1	34619000	34619100	1	4033000	4033100	1	11474300	11474400	1	6977100	6977200	3	22096400	22096500	1	25678100	25678200	2	3196200	3196300	2	783000	783100	1	34227300	34227400	1	29213600	29213700	2	8402300
1	3729900	3730000	1	2579000	2579100	1	7823900	7824000	1	9042000	9042100	1	7168500	7168600	1	5581000	5581100	1	34729000	34729100	1	4055600	4055700	1	11474500	11474600	1	7070700	7070800	3	22380300	22380400	1	25783300	25783400	2	3196300	3196400	2	783600	783700	1	34227400	34227500	1	29213800	29213900	2	8402500
1	3733100	3733200	1	2579100	2579200	1	7827700	7827800	1	9042300	9042400	1	7168600	7168700	1	5581100	5581200	1	34779200	34779300	1	4055700	4055800	1	11474600	11474700	1	7162500	7162600	3	22443100	22443200	1	25783800	25783900	2	3233700	3233800	2	783800	783900	1	34227500	34227600	1	29213900	29214000	2	8402600
1	3747800	3747900	1	2593100	2593200	1	7827900	7828000	1	9042400	9042500	1	7169200	7169300	1	5581200	5581300	1	34786800	34786900	1	4055800	4055900	1	11474900	11475000	1	7187400	7187500	3	24642500	24642600	1	25817600	25817700	2	3233800	3233900	2	783900	784000	1	34229000	34229100	1	29947700	29947800	2	8402900
1	3777900	3778000	1	2623900	2624000	1	7922000	7922100	1	9042500	9042600	1	7171500	7171600	1	5581300	5581400	1	35075600	35075700	1	4055900	4056000	1	11475100	11475200	1	7196600	7196700	3	25324500	25324600	1	25822900	25823000	2	3233900	3234000	2	784300	784400	1	34229100	34229200	1	30223200	30223300	2	8403000
1	3778000	3778100	1	2647200	2647300	1	7922100	7922200	1	9042600	9042700	1	7171600	7171700	1	5581400	5581500	1	35425300	35425400	1	4056000	4056100	1	11509900	11510000	1	7219500	7219600	3	25816700	25816800	1	26028800	26028900	2	3681400	3681500	2	784400	784500	1	34229200	34229300	1	30238600	30238700	2	8406800
1	3813800	3813900	1	2658800	2658900	1	7922200	7922300	1	9043300	9043400	1	7171700	7171800	1	5581500	5581600	1	35425500	35425600	1	4185800	4185900	1	11510200	11510300	1	7257600	7257700	3	26680800	26680900	1	26051500	26051600	2	3985600	3985700	2	807600	807700	1	34229300	34229400	1	30238700	30238800	2	8406900
1	3837800	3837900	1	2663300	2663400	1	7976100	7976200	1	9072000	9072100	1	7171800	7171900	1	5581600	5581700	1	35579600	35579700	1	4185900	4186000	1	11524900	11525000	1	7257700	7257800	3	27176100	27176200	1	26094200	26094300	2	4065300	4065400	2	807700	807800	1	34256900	34257000	1	30735200	30735300	2	8407000
1	3893700	3893800	1	2757100	2757200	1	7990800	7990900	1	9084100	9084200	1	7172200	7172300	1	5581700	5581800	1	35702400	35702500	1	4193700	4193800	1	11557700	11557800	1	7257800	7257900	3	27485600	27485700	1	26180400	26180500	2	4072300	4072400	2	807800	807900	1	34257100	34257200	1	30909400	30909500	2	8407100
1	3912500	3912600	1	2757300	2757400	1	7992200	7992300	1	9087600	9087700	1	7172300	7172400	1	5581800	5581900	1	35702600	35702700	1	4193800	4193900	1	11557800	11557900	1	7300500	7300600	3	28218600	28218700	1	26382600	26382700	2	4415400	4415500	2	807900	808000	1	34285600	34285700	1	30909500	30909600	2	8407400
1	3917100	3917200	1	2774800	2774900	1	8014400	8014500	1	9087700	9087800	1	7172400	7172500	1	5581900	5582000	1	35779000	35779100	1	4205200	4205300	1	11640500	11640600	1	7396600	7396700	3	28322100	28322200	1	26414400	26414500	2	4415500	4415600	2	808000	808100	1	34287400	34287500	1	30909600	30909700	2	8407500
1	3917200	3917300	1	2775000	2775100	1	8046200	8046300	1	9108900	9109000	1	7172700	7172800	1	5582100	5582200	1	35798900	35799000	1	4205300	4205400	1	11640600	11640700	1	7503300	7503400	3	29408100	29408200	1	26437900	26438000	2	4512900	4513000	2	808100	808200	1	34287500	34287600	1	30909700	30909800	2	8407600
1	3917300	3917400	1	2775600	2775700	1	8087600	8087700	1	9127700	9127800	1	7172800	7172900	1	5582300	5582400	1	35799100	35799200	1	4208000	4208100	1	11661700	11661800	1	7545900	7546000	3	30368200	30368300	1	26483700	26483800	2	4554900	4555000	2	808200	808300	1	34289600	34289700	1	30909800	30909900	2	8407700
1	3943400	3943500	1	2775700	2775800	1	8138900	8139000	1	9131200	9131300	1	7173000	7173100	1	5582400	5582500	1	35996100	35996200	1	4225500	4225600	1	11674200	11674300	1	7546300	7546400	3	30446900	30447000	1	26487700	26487800	2	5232100	5232200	2	811400	811500	1	34289700	34289800	1	30909900	30910000	2	8407800
1	3946400	3946500	1	2784000	2784100	1	8164900	8165000	1	9132600	9132700	1	7173100	7173200	1	5582600	5582700	1	36027900	36028000	1	4251900	4252000	1	11674300	11674400	1	7546400	7546500	3	30492500	30492600	1	26492400	26492500	2	5232200	5232300	2	811500	811600	1	34291000	34291100	1	31132800	31132900	2	8408100
1	3964700	3964800	1	2787900	2788000	1	8166400	8166500	1	9212900	9213000	1	7173200	7173300	1	5582700	5582800	1	36181000	36181100	1	4253100	4253200	1	11764400	11764500	1	7563400	7563500	3	30492600	30492700	1	26492500	26492600	2	5232300	5232400	2	811600	811700	1	34291100	34291200	1	31132900	31133000	2	8408200
1	3967100	3967200	1	2809300	2809400	1	8325000	8325100	1	9216500	9216600	1	7173300	7173400	1	5582800	5582900	1	36262800	36262900	1	4261700	4261800	1	11882800	11882900	1	7662000	7662100	3	30547000	30547100	1	26680800	26680900	2	5250000	5250100	2	811700	811800	1	34291300	34291400	1	31309000	31309100	2	8408300
1	3967200	3967300	1	2809800	2809900	1	8325100	8325200	1	9335600	9335700	1	7173400	7173500	1	5582900	5583000	1	36291800	36291900	1	4276600	4276700	1	11928700	11928800	1	7715400	7715500	3	30667800	30667900	1	26680900	26681000	2	5250100	5250200	2	811800	811900	1	34578400	34578500	1	31613000	31613100	2	8408400
1	3970100	3970200	1	2846300	2846400	1	8340200	8340300	1	9351500	9351600	1	7173500	7173600	1	5583000	5583100	1	36321500	36321600	1	4279400	4279500	1	11929200	11929300	1	7768100	7768200	3	30889500	30889600	1	26694600	26694700	2	5508500	5508600	2	811900	812000	1	34766400	34766500	1	32282700	32282800	2	8408500
1	3992700	3992800	1	2858400	2858500	1	8419400	8419500	1	9351600	9351700	1	7199800	7199900	1	5583100	5583200	1	36367100	36367200	1	4285000	4285100	1	11929300	11929400	1	7768200	7768300	3	30985300	30985400	1	26695800	26695900	2	5508600	5508700	2	812000	812100	1	35264200	35264300	1	32339800	32339900	2	8408600
1	3998400	3998500	1	2858500	2858600	1	8457500	8457600	1	9351700	9351800	1	7218700	7218800	1	5583200	5583300	1	36455300	36455400	1	4285100	4285200	1	11933300	11933400	1	7781600	7781700	3	31200500	31200600	1	26818500	26818600	2	5509200	5509300	2	812100	812200	1	35485000	35485100	1	32457200	32457300	2	8433000
1	4022200	4022300	1	2862000	2862100	1	8458700	8458800	1	9359600	9359700	1	7218800	7218900	1	5583300	5583400	1	37022700	37022800	1	4285200	4285300	1	12141800	12141900	1	7781700	7781800	3	31715700	31715800	1	26818600	26818700	2	5585500	5585600	2	812200	812300	1	35536300	35536400	1	32458000	32458100	2	8446700
1	4032800	4032900	1	2887400	2887500	1	8459900	8460000	1	9359800	9359900	1	7218900	7219000	1	5583500	5583600	1	37355100	37355200	1	4295000	4295100	1	12142600	12142700	1	7781800	7781900	3	31716700	31716800	1	26820900	26821000	2	5867100	5867200	2	814400	814500	1	35563100	35563200	1	32458100	32458200	2	8446800
1	4033000	4033100	1	2887600	2887700	1	8460000	8460100	1	9366200	9366300	1	7219100	7219200	1	5583600	5583700	1	37355200	37355300	1	4295400	4295500	1	12142700	12142800	1	7790200	7790300	3	31763900	31764000	1	26848200	26848300	2	6112400	6112500	2	814500	814600	1	35798400	35798500	1	32686000	32686100	2	8447100
1	4044700	4044800	1	2896600	2896700	1	8460500	8460600	1	9369000	9369100	1	7219200	7219300	1	5583700	5583800	1	37607500	37607600	1	4305900	4306000	1	12142800	12142900	1	7790700	7790800	3	31814700	31814800	1	27022300	27022400	2	6696200	6696300	2	814600	814700	1	35798500	35798600	1	32686100	32686200	2	8447200
1	4047600	4047700	1	2902300	2902400	1	8460700	8460800	1	9370300	9370400	1	7219300	7219400	1	5583900	5584000	1	37607600	37607700	1	4311700	4311800	1	12142900	12143000	1	7790800	7790900	3	31815900	31816000	1	27025600	27025700	2	7607700	7607800	2	814700	814800	1	35801500	35801600	1	33016600	33016700	2	8447500
1	4055600	4055700	1	2906100	2906200	1	8462600	8462700	1	9392500	9392600	1	7542400	7542500	1	5584000	5584100	1	37610800	37610900	1	4350800	4350900	1	12143000	12143100	1	7790900	7791000	3	32111800	32111900	1	27150400	27150500	2	8847200	8847300	2	814800	814900	1	36115200	36115300	1	33153100	33153200	2	8447600
1	4055700	4055800	1	2934300	2934400	1	8473300	8473400	1	9392800	9392900	1	7542500	7542600	1	5584500	5584600	1	37610900	37611000	1	4354800	4354900	1	12143100	12143200	1	7791000	7791100	3	32211300	32211400	1	27170500	27170600	2	9095300	9095400	2	814900	815000	1	36477600	36477700	1	33153200	33153300	2	8447700
1	4055900	4056000	1	2940200	2940300	1	8508600	8508700	1	9392900	9393000	1	7542600	7542700	1	5584600	5584700	1	37640400	37640500	1	4370800	4370900	1	12143200	12143300	1	7791600	7791700	3	32262000	32262100	1	27170600	27170700	2	9095500	9095600	2	815000	815100	1	36501200	36501300	1	33162400	33162500	2	8447800
1	4097100	4097200	1	2946100	2946200	1	8519400	8519500	1	9423100	9423200	1	7544800	7544900	1	5584700	5584800	1	37705900	37706000	1	4371900	4372000	1	12143400	12143500	1	7791700	7791800	3	32718900	32719000	1	27184600	27184700	2	9096400	9096500	2	815100	815200	1	36552100	36552200	1	33162500	33162600	2	8448000
1	4097200	4097300	1	2946200	2946300	1	8519500	8519600	1	9436200	9436300	1	7544900	7545000	1	5584800	5584900	1	37872400	37872500	1	4442400	4442500	1	12143500	12143600	1	7802800	7802900	3	33125300	33125400	1	27187000	27187100	2	9426000	9426100	2	815200	815300	1	37211000	37211100	1	33162700	33162800	2	8448100
1	4098000	4098100	1	2948400	2948500	1	8534000	8534100	1	9436300	9436400	1	7545300	7545400	1	5584900	5585000	1	37934400	37934500	1	4448400	4448500	1	12277100	12277200	1	7834200	7834300	3	33130600	33130700	1	27201900	27202000	2	9426100	9426200	2	815300	815400	1	37221200	37221300	1	33500700	33500800	2	8448200
1	4164700	4164800	1	2948500	2948600	1	8534100	8534200	1	9436500	9436600	1	7545500	7545600	1	5585200	5585300	1	38100400	38100500	1	4448600	4448700	1	12301600	12301700	1	7868000	7868100	3	33398200	33398300	1	27202000	27202100	2	9441400	9441500	2	815400	815500	1	37249000	37249100	1	33505900	33506000	2	8448300
1	4184300	4184400	1	2954100	2954200	1	8535000	8535100	1	9436600	9436700	1	7545600	7545700	1	5585300	5585400	1	38131900	38132000	1	4525100	4525200	1	12301700	12301800	1	7868100	7868200	3	33545000	33545100	1	27329500	27329600	2	9598000	9598100	2	815500	815600	1	37314700	37314800	1	33506200	33506300	2	8448400
1	4185800	4185900	1	2955700	2955800	1	8535100	8535200	1	9436700	9436800	1	7545700	7545800	1	5585500	5585600	1	38244100	38244200	1	4525300	4525400	1	12309500	12309600	1	7868200	7868300	3	33545100	33545200	1	27467700	27467800	2	9613900	9614000	2	815600	815700	1	37314800	37314900	1	33506300	33506400	2	8458600
1	4185900	4186000	1	2961700	2961800	1	8553200	8553300	1	9436800	9436900	1	7545800	7545900	1	5585600	5585700	1	38497100	38497200	1	4550400	4550500	1	12309600	12309700	1	7926700	7926800	3	33681400	33681500	1	27579400	27579500	2	9635800	9635900	2	815700	815800	1	37415300	37415400	1	33506400	33506500	2	8458700
1	4205200	4205300	1	2972500	2972600	1	8654900	8655000	1	9437000	9437100	1	7545900	7546000	1	5585700	5585800	1	38576600	38576700	1	4560300	4560400	1	12311700	12311800	1	7939600	7939700	3	33803100	33803200	1	27649600	27649700	2	9726300	9726400	2	815800	815900	1	37693600	37693700	1	33506500	33506600	2	8458800
1	4205300	4205400	1	2972600	2972700	1	8655100	8655200	1	9437100	9437200	1	7546000	7546100	1	5585800	5585900	1	38669900	38670000	1	4570600	4570700	1	12714400	12714500	1	7939700	7939800	3	33925500	33925600	1	27980400	27980500	2	10270800	10270900	2	816000	816100	1	38133300	38133400	1	33506600	33506700	2	8458900
1	4231300	4231400	1	2997000	2997100	1	8677400	8677500	1	9437300	9437400	1	7546100	7546200	1	5585900	5586000	1	38670000	38670100	1	4575900	4576000	1	12885100	12885200	1	7990800	7990900	3	34351700	34351800	1	28010700	28010800	2	10335200	10335300	2	816100	816200	1	38401300	38401400	1	33506700	33506800	2	8459000
1	4261700	4261800	1	2997500	2997600	1	8677500	8677600	1	9438400	9438500	1	7546200	7546300	1	5586000	5586100	1	38701900	38702000	1	4579300	4579400	1	13105900	13106000	1	7990900	7991000	3	34351800	34351900	1	28012400	28012500	2	10335300	10335400	2	816400	816500	1	38470600	38470700	1	33506800	33506900	2	8459100
1	4279400	4279500	1	2999900	3000000	1	8688000	8688100	1	9438500	9438600	1	7546300	7546400	1	5586100	5586200	1	38791100	38791200	1	4580800	4580900	1	13122400	13122500	1	7992400	7992500	3	34352600	34352700	1	28115300	28115400	2	11135800	11135900	2	895800	895900	1	38470700	38470800	1	33506900	33507000	2	8459200
1	4279500	4279600	1	3007400	3007500	1	8717300	8717400	1	9438600	9438700	1	7546400	7546500	1	5586400	5586500	1	38799100	38799200	1	4580900	4581000	1	13179200	13179300	1	8080700	8080800	3	34422200	34422300	1	28115400	28115500	2	11195300	11195400	2	895900	896000	1	38528300	38528400	1	33507000	33507100	2	8459300
1	4285100	4285200	1	3007500	3007600	1	8814100	8814200	1	9438800	9438900	1	7546500	7546600	1	5586800	5586900	1	38799200	38799300	1	4594200	4594300	1	13283700	13283800	1	8130000	8130100	3	34479400	34479500	1	28115500	28115600	2	11195900	11196000	2	975100	975200	1	38528400	38528500	1	33512400	33512500	2	8459400
1	4285200	4285300	1	3028100	3028200	1	8846400	8846500	1	9439000	9439100	1	7621200	7621300	1	5586900	5587000	1	38858100	38858200	1	4617600	4617700	1	13283800	13283900	1	8138700	8138800	3	34592900	34593000	1	28150900	28151000	2	12183300	12183400	2	975200	975300	1	38528500	38528600	1	33520500	33520600	2	8459500
1	4351900	4352000	1	3028200	3028300	1	8863200	8863300	1	9439100	9439200	1	7637800	7637900	1	5587000	5587100	1	38868100	38868200	1	4635700	4635800	1	13284200	13284300	1	8139200	8139300	3	34691900	34692000	1	28161200	28161300	2	12675200	12675300	2	1025200	1025300	1	38735500	38735600	1	33527500	33527600	2	8459600
1	4354600	4354700	1	3045300	3045400	1	8863300	8863400	1	9439200	9439300	1	7638000	7638100	1	5587100	5587200	1	38868200	38868300	1	4635800	4635900	1	13389800	13389900	1	8189300	8189400	3	36320100	36320200	1	28330100	28330200	2	12739700	12739800	2	1032200	1032300	1	38929500	38929600	1	33532200	33532300	2	8459700
1	4403600	4403700	1	3045400	3045500	1	8865000	8865100	1	9439300	9439400	1	7881900	7882000	1	5587200	5587300	1	39003900	39004000	1	4652400	4652500	1	13389900	13390000	1	8231300	8231400	4	245400	245500	1	28345000	28345100	2	12739800	12739900	2	1079700	1079800	1	38929600	38929700	1	33532300	33532400	2	8459900
1	4410200	4410300	1	3057900	3058000	1	8869600	8869700	1	9439400	9439500	1	7990900	7991000	1	5587300	5587400	1	39151200	39151300	1	4653700	4653800	1	13390000	13390100	1	8231400	8231500	4	251500	251600	1	28356300	28356400	2	13016300	13016400	2	1480600	1480700	1	39306600	39306700	1	33532400	33532500	2	8460000
1	4420500	4420600	1	3071500	3071600	1	8872000	8872100	1	9439500	9439600	1	8015700	8015800	1	5587400	5587500	1	39151400	39151500	1	4653800	4653900	1	13390800	13390900	1	8273900	8274000	4	409500	409600	1	28400300	28400400	2	13900100	13900200	2	1553100	1553200	1	40793700	40793800	1	33532700	33532800	2	8460100
1	4420600	4420700	1	3071600	3071700	1	8873300	8873400	1	9439600	9439700	1	8021800	8021900	1	5587500	5587600	1	39172700	39172800	1	4653900	4654000	1	13390900	13391000	1	8312000	8312100	4	1071600	1071700	1	28416100	28416200	2	13969100	13969200	2	1685500	1685600	1	40798000	40798100	1	33532800	33532900	2	8460200
1	4448400	4448500	1	3073800	3073900	1	8875100	8875200	1	9439700	9439800	1	8111700	8111800	1	5587600	5587700	1	39228500	39228600	1	4667700	4667800	1	13391400	13391500	1	8341700	8341800	4	1977800	1977900	1	28439500	28439600	2	14242000	14242100	2	1685600	1685700	1	40798100	40798200	1	33532900	33533000	2	8460300
1	4453100	4453200	1	3074000	3074100	1	9001900	9002000	1	9439800	9439900	1	8267600	8267700	1	5587700	5587800	1	39306100	39306200	1	4672300	4672400	1	13391500	13391600	1	8443500	8443600	4	1977900	1978000	1	28474800	28474900	2	14245700	14245800	2	1797400	1797500	1	40798800	40798900	1	33533000	33533100	2	8460400
1	4457400	4457500	1	3074700	3074800	1	9002000	9002100	1	9439900	9440000	1	8325100	8325200	1	5587800	5587900	1	39325800	39325900	1	4693800	4693900	1	13392100	13392200	1	8462600	8462700	4	3235900	3236000	1	28491400	28491500	2	14245800	14245900	2	1797900	1798000	1	40798900	40799000	1	33533200	33533300	2	8460500
1	4493800	4493900	1	3074800	3074900	1	9030200	9030300	1	9440300	9440400	1	8600200	8600300	1	5587900	5588000	1	39326700	39326800	1	4698600	4698700	1	13392200	13392300	1	8463000	8463100	4	4314000	4314100	1	28491500	28491600	2	14245900	14246000	2	2583000	2583100	1	41010700	41010800	1	33533300	33533400	2	8465100
1	4493900	4494000	1	3075200	3075300	1	9030300	9030400	1	9440400	9440500	1	8600300	8600400	1	5588100	5588200	1	39419500	39419600	1	4704400	4704500	1	13392300	13392400	1	8463100	8463200	4	4588000	4588100	1	28534800	28534900	2	14246000	14246100	2	2615800	2615900	1	41135900	41136000	1	33544700	33544800	2	8465200
1	4523800	4523900	1	3075300	3075400	1	9030400	9030500	1	9440500	9440600	1	8600400	8600500	1	5588200	5588300	1	39419700	39419800	1	4709000	4709100	1	13435500	13435600	1	8474900	8475000	4	4834900	4835000	1	28534900	28535000	2	14246100	14246200	2	3196200	3196300	1	41136500	41136600	1	33544800	33544900	2	8465300
1	4523900	4524000	1	3077500	3077600	1	9030500	9030600	1	9440600	9440700	1	8600500	8600600	1	5588300	5588400	1	39419900	39420000	1	4709100	4709200	1	13733000	13733100	1	8506300	8506400	4	4853100	4853200	1	28590500	28590600	2	14246200	14246300	2	3196300	3196400	1	41136600	41136700	1	33544900	33545000	2	8465400
1	4568800	4568900	1	3085500	3085600	1	9030600	9030700	1	9463900	9464000	1	8600600	8600700	1	5588400	5588500	1	39420000	39420100	1	4723300	4723400	1	13758700	13758800	1	8506400	8506500	4	5920200	5920300	1	28617600	28617700	2	14246400	14246500	2	3233700	3233800	1	41296700	41296800	1	33545000	33545100	2	8465500
1	4578500	4578600	1	3095400	3095500	1	9030700	9030800	1	9536600	9536700	1	8600700	8600800	1	5588500	5588600	1	39420200	39420300	1	4725500	4725600	1	13759100	13759200	1	8528700	8528800	4	6267800	6267900	1	28668600	28668700	2	14246500	14246600	2	3233800	3233900	1	41455700	41455800	1	33545100	33545200	2	8465600
1	4580800	4580900	1	3095500	3095600	1	9030800	9030900	1	9537600	9537700	1	8600800	8600900	1	5588700	5588800	1	39511400	39511500	1	4753300	4753400	1	13786700	13786800	1	8530000	8530100	4	7298800	7298900	1	28708800	28708900	2	14246600	14246700	2	3233900	3234000	1	41455800	41455900	1	33545200	33545300	2	8465700
1	4585500	4585600	1	3130800	3130900	1	9031000	9031100	1	9538000	9538100	1	8600900	8601000	1	5588800	5588900	1	39521900	39522000	1	4758200	4758300	1	13786800	13786900	1	8548000	8548100	4	7300100	7300200	1	28761600	28761700	2	14246700	14246800	2	3557200	3557300	1	41455900	41456000	1	33545300	33545400	2	8465900
1	4637700	4637800	1	3139100	3139200	1	9031500	9031600	1	9548200	9548300	1	8601000	8601100	1	5594200	5594300	1	39522000	39522100	1	4789100	4789200	1	13788400	13788500	1	8601000	8601100	4	7477900	7478000	1	28761700	28761800	2	14246800	14246900	2	3623200	3623300	1	41486600	41486700	1	33545400	33545500	2	8466000
1	4652400	4652500	1	3141300	3141400	1	9032900	9033000	1	9548300	9548400	1	8601100	8601200	1	5594300	5594400	1	39772800	39772900	1	4789200	4789300	1	13788500	13788600	1	8601100	8601200	4	8172500	8172600	1	28810700	28810800	2	14246900	14247000	2	4149100	4149200	1	41486700	41486800	1	33545500	33545600	2	8466100
1	4665200	4665300	1	3143500	3143600	1	9033100	9033200	1	9578500	9578600	1	8601200	8601300	1	5594400	5594500	1	39901000	39901100	1	4805400	4805500	1	13788600	13788700	1	8601400	8601500	4	8213800	8213900	1	28824800	28824900	2	14247000	14247100	2	4371900	4372000	1	41486800	41486900	1	33545600	33545700	2	8466200
1	4667700	4667800	1	3155000	3155100	1	9033400	9033500	1	9586000	9586100	1	8601300	8601400	1	5594500	5594600	1	39917900	39918000	1	4813300	4813400	1	13788700	13788800	1	8601500	8601600	4	8213900	8214000	1	28824900	28825000	2	14247100	14247200	2	4512900	4513000	1	41594000	41594100	1	33554100	33554200	2	8466300
1	4667800	4667900	1	3155100	3155200	1	9033500	9033600	1	9594100	9594200	1	8601400	8601500	1	5594600	5594700	1	39996100	39996200	1	4815700	4815800	1	13788800	13788900	1	8601600	8601700	4	8303600	8303700	1	28907600	28907700	2	14257300	14257400	2	4554900	4555000	1	41672000	41672100	1	33564700	33564800	2	8466400
1	4672300	4672400	1	3170800	3170900	1	9033600	9033700	1	9594200	9594300	1	8601500	8601600	1	5594800	5594900	1	40061200	40061300	1	4816000	4816100	1	13788900	13789000	1	8601700	8601800	4	8726500	8726600	1	29025300	29025400	2	14257400	14257500	2	5215200	5215300	1	41672100	41672200	1	33571000	33571100	2	8466500
1	4701900	4702000	1	3170900	3171000	1	9033700	9033800	1	9624700	9624800	1	8601600	8601700	1	5594900	5595000	1	40086800	40086900	1	4816400	4816500	1	13789100	13789200	1	8601800	8601900	4	8726600	8726700	1	29060000	29060100	2	14257500	14257600	2	5232100	5232200	1	42284500	42284600	1	33571100	33571200	2	8466600
1	4704400	4704500	1	3175900	3176000	1	9033800	9033900	1	9713100	9713200	1	8601700	8601800	1	5595000	5595100	1	40086900	40087000	1	4816500	4816600	1	13853000	13853100	1	8601900	8602000	4	9101100	9101200	1	29165300	29165400	2	14261100	14261200	2	5232200	5232300	1	42300400	42300500	1	33582000	33582100	2	8466700
1	4776400	4776500	1	3189100	3189200	1	9033900	9034000	1	9778200	9778300	1	8601800	8601900	1	5595100	5595200	1	40329500	40329600	1	4831800	4831900	1	13915000	13915100	1	8602100	8602200	4	9115400	9115500	1	29195300	29195400	2	14261200	14261300	2	5232300	5232400	1	42357100	42357200	1	33582100	33582200	2	8466800
1	4781800	4781900	1	3194000	3194100	1	9034100	9034200	1	9778300	9778400	1	8601900	8602000	1	5595200	5595300	1	40469600	40469700	1	4832100	4832200	1	13973400	13973500	1	8602200	8602300	4	9174100	9174200	1	29212500	29212600	2	14279200	14279300	2	5250000	5250100	1	42625400	42625500	1	33586500	33586600	2	8466900
1	4793300	4793400	1	3194100	3194200	1	9034200	9034300	1	9833900	9834000	1	8602000	8602100	1	5595300	5595400	1	40508100	40508200	1	4886200	4886300	1	13989600	13989700	1	8602300	8602400	4	9174200	9174300	1	29473500	29473600	2	14280200	14280300	2	5250100	5250200	1	43020700	43020800	1	33586600	33586700	2	8467000
1	4803900	4804000	1	3194400	3194500	1	9034400	9034500	1	9834000	9834100	1	8602100	8602200	1	5595400	5595500	1	40572200	40572300	1	4928900	4929000	1	14333600	14333700	1	8602400	8602500	4	9209400	9209500	1	29497900	29498000	2	14280300	14280400	2	5508500	5508600	1	43199600	43199700	1	33586700	33586800	2	8524200
1	4805400	4805500	1	3219600	3219700	1	9034500	9034600	1	9983600	9983700	1	8602200	8602300	1	5595500	5595600	1	40796200	40796300	1	4944000	4944100	1	14333700	14333800	1	8602500	8602600	4	12066100	12066200	1	29556900	29557000	2	14280700	14280800	2	5508600	5508700	2	608800	608900	1	33586800	33586900	2	8526000
1	4805500	4805600	1	3234400	3234500	1	9035000	9035100	1	9984300	9984400	1	8602300	8602400	1	5595600	5595700	1	40914200	40914300	1	4948000	4948100	1	14333800	14333900	1	8602700	8602800	4	13668500	13668600	1	29573300	29573400	2	14280800	14280900	2	5509200	5509300	2	608900	609000	1	33586900	33587000	2	8527100
1	4813300	4813400	1	3239600	3239700	1	9040100	9040200	1	9989500	9989600	1	8602400	8602500	1	5595700	5595800	1	41046700	41046800	1	4948200	4948300	1	14333900	14334000	1	8603000	8603100	4	13952500	13952600	1	29760200	29760300	2	14281400	14281500	2	6155800	6155900	2	634000	634100	1	33587000	33587100	2	8530200
1	4835100	4835200	1	3239700	3239800	1	9040300	9040400	1	9993500	9993600	1	8602500	8602600	1	5595800	5595900	1	41108300	41108400	1	4975700	4975800	1	14334400	14334500	1	8603400	8603500	4	13952600	13952700	1	29780600	29780700	2	14283500	14283600	2	6696200	6696300	2	634600	634700	1	33587100	33587200	2	8590900
1	4863800	4863900	1	3240900	3241000	1	9040900	9041000	1	9996600	9996700	1	8602600	8602700	1	5595900	5596000	1	41148700	41148800	1	4988400	4988500	1	14334500	14334600	1	8603600	8603700	4	13952700	13952800	1	29825200	29825300	2	14283600	14283700	2	6776600	6776700	2	782600	782700	1	33587200	33587300	2	8591000
1	4864000	4864100	1	3241000	3241100	1	9041000	9041100	1	9996700	9996800	1	8602700	8602800	1	5596000	5596100	1	41179000	41179100	1	4995700	4995800	1	14334600	14334700	1	8604000	8604100	4	13957800	13957900	1	29931800	29931900	2	14284900	14285000	2	6776700	6776800	2	783100	783200	1	33587300	33587400	2	9580500
1	4868900	4869000	1	3245600	3245700	1	9041100	9041200	1	9999400	9999500	1	8602800	8602900	1	5596100	5596200	1	41188900	41189000	1	4998600	4998700	1	14334700	14334800	1	8637300	8637400	4	13957900	13958000	1	29931900	29932000	2	14285000	14285100	2	6777700	6777800	2	783600	783700	1	33587400	33587500	2	9580600
1	4912100	4912200	1	3245700	3245800	1	9041700	9041800	1	10001100	10001200	1	8602900	8603000	1	5596200	5596300	1	41327000	41327100	1	5012900	5013000	1	14334800	14334900	1	8671600	8671700	4	13958000	13958100	1	30030500	30030600	2	14285900	14286000	2	7622400	7622500	2	783800	783900	1	33587500	33587600	2	9580700
1	4917200	4917300	1	3250200	3250300	1	9041800	9041900	1	10031500	10031600	1	8603000	8603100	1	5596300	5596400	1	41339200	41339300	1	5051200	5051300	1	14334900	14335000	1	8673400	8673500	4	15167400	15167500	1	30073600	30073700	2	14287000	14287100	2	8519900	8520000	2	783900	784000	1	33587600	33587700	2	9580800
1	4927300	4927400	1	3267600	3267700	1	9042500	9042600	1	10032600	10032700	1	8603200	8603300	1	5596400	5596500	1	41354800	41354900	1	5058800	5058900	1	14335000	14335100	1	8673700	8673800	4	15895800	15895900	1	30107500	30107600	2	14287300	14287400	2	8524100	8524200	2	784300	784400	1	33587700	33587800	2	9580900
1	4928700	4928800	1	3271500	3271600	1	9042600	9042700	1	10032700	10032800	1	8603300	8603400	1	5596500	5596600	1	41354900	41355000	1	5068000	5068100	1	14335100	14335200	1	8709400	8709500	4	15895900	15896000	1	30229000	30229100	2	14287500	14287600	2	8526100	8526200	2	784400	784500	1	33587800	33587900	2	9581000
1	4929300	4929400	1	3305400	3305500	1	9049300	9049400	1	10150800	10150900	1	8603400	8603500	1	5596900	5597000	1	41636100	41636200	1	5068200	5068300	1	14335200	14335300	1	8712400	8712500	4	16494700	16494800	1	30358800	30358900	2	14287600	14287700	2	8527200	8527300	2	807700	807800	1	33587900	33588000	2	9581100
1	4932000	4932100	1	3370100	3370200	1	9084100	9084200	1	10234400	10234500	1	8603500	8603600	1	5597000	5597100	1	41939800	41939900	1	5090200	5090300	1	14335300	14335400	1	8814100	8814200	4	17423800	17423900	1	30358900	30359000	2	14288600	14288700	2	8528600	8528700	2	811500	811600	1	33588000	33588100	2	9581300
1	4942800	4942900	1	3380200	3380300	1	9127400	9127500	1	10260900	10261000	1	8603600	8603700	1	5597300	5597400	1	41943700	41943800	1	5090300	5090400	1	14335400	14335500	1	8886100	8886200	4	17564100	17564200	1	30445800	30445900	2	14288700	14288800	2	8530100	8530200	2	811600	811700	1	33588100	33588200	2	9581400
1	4942900	4943000	1	3380300	3380400	1	9131200	9131300	1	10303300	10303400	1	8603700	8603800	1	5597400	5597500	1	42015200	42015300	1	5104600	5104700	1	14335600	14335700	1	8886200	8886300	4	18031700	18031800	1	30469600	30469700	2	14414400	14414500	2	8532300	8532400	2	811700	811800	1	33588400	33588500	2	9581500
1	4947800	4947900	1	3384100	3384200	1	9187600	9187700	1	10359600	10359700	1	8603800	8603900	1	5597500	5597600	1	42045200	42045300	1	5109600	5109700	1	14335700	14335800	1	8930200	8930300	4	18036100	18036200	1	30702400	30702500	2	15466100	15466200	2	8534100	8534200	2	811800	811900	1	33588700	33588800	2	9581600
1	4947900	4948000	1	3384500	3384600	1	9215800	9215900	1	10451500	10451600	1	8603900	8604000	1	5597600	5597700	1	42122000	42122100	1	5109700	5109800	1	14335800	14335900	1	8930300	8930400	4	18143900	18144000	1	30720500	30720600	2	15466200	15466300	2	8534200	8534300	2	811900	812000	1	33712200	33712300	2	9581700
1	4948000	4948100	1	3384600	3384700	1	9217000	9217100	1	10463000	10463100	1	8604000	8604100	1	5598600	5598700	1	42214100	42214200	1	5109800	5109900	1	14336200	14336300	1	8930400	8930500	4	18993200	18993300	1	30720600	30720700	2	15510200	15510300	2	8804400	8804500	2	814400	814500	1	34052800	34052900	2	9581900
1	4951900	4952000	1	3384700	3384800	1	9217600	9217700	1	10463100	10463200	1	8604100	8604200	1	5598700	5598800	1	42214400	42214500	1	5126400	5126500	1	14336400	14336500	1	8993700	8993800	4	19021400	19021500	1	30801900	30802000	2	15956700	15956800	2	9400400	9400500	2	814700	814800	1	34053400	34053500	2	9582000
1	4952000	4952100	1	3393200	3393300	1	9250000	9250100	1	10475300	10475400	1	8604400	8604500	1	5601900	5602000	1	42214500	42214600	1	5126900	5127000	1	14336500	14336600	1	9008300	9008400	4	19350900	19351000	1	30823500	30823600	2	16227700	16227800	2	9451800	9451900	2	814900	815000	1	34055300	34055400	2	9582100
1	4960200	4960300	1	3403500	3403600	1	9255700	9255800	1	10475400	10475500	1	8604500	8604600	1	5602000	5602100	1	42285000	42285100	1	5127200	5127300	1	14336600	14336700	1	9008400	9008500	4	19515500	19515600	1	30887600	30887700	2	16236400	16236500	2	9478700	9478800	2	815000	815100	1	34203200	34203300	2	9582200
1	4962200	4962300	1	3403600	3403700	1	9267700	9267800	1	10834500	10834600	1	8604700	8604800	1	5602100	5602200	1	42345100	42345200	1	5134500	5134600	1	14336700	14336800	1	9017700	9017800	4	19991100	19991200	1	30890100	30890200	2	16541600	16541700	2	9598000	9598100	2	815300	815400	1	34426300	34426400	2	9582300
1	4975700	4975800	1	3417900	3418000	1	9295700	9295800	1	10858800	10858900	1	8604800	8604900	1	5602200	5602300	1	42460000	42460100	1	5157900	5158000	1	14336800	14336900	1	9035300	9035400	4	19991200	19991300	1	30905300	30905400	2	17576700	17576800	2	9613900	9614000	2	815400	815500	1	34538900	34539000	2	9586100
1	4988400	4988500	1	3420200	3420300	1	9300700	9300800	1	10859700	10859800	1	8612100	8612200	1	5602300	5602400	1	42462100	42462200	1	5158000	5158100	1	14336900	14337000	1	9038200	9038300	4	20000900	20001000	1	30907500	30907600	2	18051300	18051400	2	9625100	9625200	2	815500	815600	1	34539000	34539100	2	9586200
1	4998600	4998700	1	3429800	3429900	1	9329500	9329600	1	10859800	10859900	1	8863200	8863300	1	5602500	5602600	1	42469000	42469100	1	5159500	5159600	1	14337000	14337100	1	9039600	9039700	4	20120400	20120500	1	30916400	30916500	2	18051400	18051500	2	10270800	10270900	2	815700	815800	1	34578400	34578500	2	9586300
1	5011000	5011100	1	3429900	3430000	1	9329700	9329800	1	10863700	10863800	1	8863300	8863400	1	5602600	5602700	1	42678700	42678800	1	5159600	5159700	1	14337100	14337200	1	9040100	9040200	4	20432100	20432200	1	31039200	31039300	2	18368600	18368700	2	10270900	10271000	2	815800	815900	1	34683100	34683200	2	9586400
1	5012900	5013000	1	3431300	3431400	1	9329800	9329900	1	10894500	10894600	1	8875100	8875200	1	5602700	5602800	1	42800700	42800800	1	5159700	5159800	1	14337200	14337300	1	9040200	9040300	4	20609400	20609500	1	31042200	31042300	2	19345000	19345100	2	10335200	10335300	2	816000	816100	1	34924100	34924200	2	9586500
1	5042900	5043000	1	3438000	3438100	1	9336500	9336600	1	10916000	10916100	1	8981800	8981900	1	5602800	5602900	1	42825800	42825900	1	5176200	5176300	1	14337300	14337400	1	9040300	9040400	4	21217500	21217600	1	31042300	31042400	2	19414500	19414600	2	10335300	10335400	2	816100	816200	1	34925000	34925100	2	9586700
1	5046400	5046500	1	3438500	3438600	1	9351500	9351600	1	10923200	10923300	1	8982300	8982400	1	5602900	5603000	1	42913400	42913500	1	5176300	5176400	1	14337400	14337500	1	9040400	9040500	4	21536400	21536500	1	31043100	31043200	2	19414600	19414700	2	10873100	10873200	2	938100	938200	1	34933100	34933200	2	9586800
1	5051200	5051300	1	3438600	3438700	1	9359600	9359700	1	10923300	10923400	1	8982400	8982500	1	5603000	5603100	1	42913600	42913700	1	5185200	5185300	1	14337500	14337600	1	9040500	9040600	4	21645300	21645400	1	31043600	31043700	2	19415500	19415600	2	10904700	10904800	2	1487000	1487100	1	34934000	34934100	2	9586900
1	5051300	5051400	1	3439200	3439300	1	9369000	9369100	1	10923400	10923500	1	8982800	8982900	1	5603100	5603200	1	43055000	43055100	1	5217000	5217100	1	14337600	14337700	1	9040600	9040700	4	21661500	21661600	1	31043700	31043800	2	19548900	19549000	2	11195300	11195400	2	1487600	1487700	1	34942500	34942600	2	9587000
1	5051500	5051600	1	3441800	3441900	1	9392500	9392600	1	10923500	10923600	1	8983300	8983400	1	5604700	5604800	1	43055100	43055200	1	5234100	5234200	1	14337700	14337800	1	9040700	9040800	4	21948300	21948400	1	31044000	31044100	2	19666800	19666900	2	11195900	11196000	2	1487700	1487800	1	35264200	35264300	2	9587100
1	5085000	5085100	1	3465200	3465300	1	9392800	9392900	1	10923600	10923700	1	9124400	9124500	1	5604800	5604900	1	43055200	43055300	1	5254600	5254700	1	14337800	14337900	1	9040800	9040900	4	21948400	21948500	1	31044100	31044200	2	19666900	19667000	2	11196000	11196100	2	1488300	1488400	1	35279900	35280000	2	9587300
1	5086600	5086700	1	3481800	3481900	1	9392900	9393000	1	10923700	10923800	1	9124500	9124600	1	5604900	5605000	1	43188600	43188700	1	5254700	5254800	1	14337900	14338000	1	9040900	9041000	4	22407600	22407700	1	31169900	31170000	2	20115100	20115200	2	11727700	11727800	2	1490100	1490200	1	35280000	35280100	2	9587400
1	5090200	5090300	1	3481900	3482000	1	9418100	9418200	1	10923800	10923900	1	9132300	9132400	1	5605100	5605200	2	214400	214500	1	5272700	5272800	1	14338000	14338100	1	9041000	9041100	4	22484500	22484600	1	31268700	31268800	2	20286400	20286500	2	12183300	12183400	2	1494800	1494900	1	35288900	35289000	2	9587500
1	5090300	5090400	1	3482000	3482100	1	9436600	9436700	1	10923900	10924000	1	9132700	9132800	1	5605200	5605300	2	214500	214600	1	5277800	5277900	1	14338100	14338200	1	9041100	9041200	4	22650300	22650400	1	31339800	31339900	2	20286500	20286600	2	12385800	12385900	2	1494900	1495000	1	35449400	35449500	2	9587600
1	5124900	5125000	1	3482100	3482200	1	9436700	9436800	1	10924300	10924400	1	9214300	9214400	1	5605300	5605400	2	214600	214700	1	5303200	5303300	1	14338200	14338300	1	9041200	9041300	4	22650400	22650500	1	31429300	31429400	2	20655600	20655700	2	12675200	12675300	2	1495200	1495300	1	35450600	35450700	2	9587700
1	5126900	5127000	1	3492100	3492200	1	9436800	9436900	1	10924400	10924500	1	9215100	9215200	1	5605400	5605500	2	214700	214800	1	5358200	5358300	1	14338500	14338600	1	9041300	9041400	4	22651000	22651100	1	31429600	31429700	2	20770200	20770300	2	13190000	13190100	2	1498700	1498800	1	35450700	35450800	2	9587800
1	5127200	5127300	1	3492800	3492900	1	9437000	9437100	1	10924600	10924700	1	9216100	9216200	1	5605500	5605600	2	409900	410000	1	5363700	5363800	1	14338700	14338800	1	9041400	9041500	4	22651100	22651200	1	31631700	31631800	2	21024200	21024300	2	13969100	13969200	2	1514800	1514900	1	35450800	35450900	2	9587900
1	5127400	5127500	1	3494100	3494200	1	9437100	9437200	1	10924700	10924800	1	9216300	9216400	1	5606200	5606300	2	505600	505700	1	5373500	5373600	1	14338800	14338900	1	9041500	9041600	4	23053600	23053700	1	31631800	31631900	2	21037700	21037800	2	14242000	14242100	2	1518000	1518100	1	35451300	35451400	2	10091400
1	5142200	5142300	1	3494200	3494300	1	9437400	9437500	1	10924800	10924900	1	9217000	9217100	1	5606300	5606400	2	617900	618000	1	5375600	5375700	1	14338900	14339000	1	9041600	9041700	4	23197800	23197900	1	31642100	31642200	2	21164800	21164900	2	14242800	14242900	2	1520100	1520200	1	35485000	35485100	2	10335100
1	5143400	5143500	1	3494300	3494400	1	9437500	9437600	1	10924900	10925000	1	9220500	9220600	1	5606600	5606700	2	618000	618100	1	5375700	5375800	1	14339000	14339100	1	9041700	9041800	4	24833000	24833100	1	31765900	31766000	2	21164900	21165000	2	14245700	14245800	2	1520200	1520300	1	35798400	35798500	2	10335200
1	5159500	5159600	1	3497700	3497800	1	9437700	9437800	1	10925200	10925300	1	9619900	9620000	1	5607300	5607400	2	618100	618200	1	5395900	5396000	1	14339100	14339200	1	9041800	9041900	4	25766200	25766300	1	31779700	31779800	2	21447500	21447600	2	14245800	14245900	2	1520300	1520400	1	35798500	35798600	2	10335300
1	5159700	5159800	1	3508800	3508900	1	9438000	9438100	1	10925300	10925400	1	9620000	9620100	1	5615600	5615700	2	618200	618300	1	5399100	5399200	1	14339200	14339300	1	9041900	9042000	4	26018900	26019000	1	31975300	31975400	2	21502300	21502400	2	14245900	14246000	2	1523600	1523700	1	35801500	35801600	2	11111900
1	5168500	5168600	1	3531900	3532000	1	9438100	9438200	1	10925400	10925500	1	9620100	9620200	1	5620400	5620500	2	681800	681900	1	5421300	5421400	1	14339300	14339400	1	9042000	9042100	4	26148100	26148200	1	32090700	32090800	2	21660700	21660800	2	14246000	14246100	2	1523700	1523800	1	36115200	36115300	2	11113400
1	5172000	5172100	1	3532000	3532100	1	9438200	9438300	1	10925500	10925600	1	9620200	9620300	1	5622000	5622100	2	684800	684900	1	5441600	5441700	1	14339400	14339500	1	9042100	9042200	4	26149300	26149400	1	32241000	32241100	2	22051400	22051500	2	14246100	14246200	2	1523800	1523900	1	36205600	36205700	2	11114100
1	5180900	5181000	1	3540400	3540500	1	9438400	9438500	1	10925600	10925700	1	9620300	9620400	1	5637600	5637700	2	720900	721000	1	5463100	5463200	1	14339600	14339700	1	9042300	9042400	4	26708800	26708900	1	32292000	32292100	2	22076700	22076800	2	14246200	14246300	2	1527300	1527400	1	36552100	36552200	2	11114600
1	5181000	5181100	1	3541200	3541300	1	9438500	9438600	1	10925700	10925800	1	9620400	9620500	1	5752600	5752700	2	806800	806900	1	5463300	5463400	1	14350000	14350100	1	9042400	9042500	4	26708900	26709000	1	32421100	32421200	2	22162700	22162800	2	14246300	14246400	2	1527400	1527500	1	36588300	36588400	2	11195300
1	5194100	5194200	1	3541300	3541400	1	9438600	9438700	1	10925900	10926000	1	9620500	9620600	1	5753000	5753100	2	956000	956100	1	5463400	5463500	1	14455700	14455800	1	9042500	9042600	4	26753500	26753600	1	32479300	32479400	2	22263900	22264000	2	14246400	14246500	2	1527500	1527600	1	36590200	36590300	2	11195800
1	5194200	5194300	1	3541400	3541500	1	9438700	9438800	1	10926000	10926100	1	9620600	9620700	1	5772800	5772900	2	1027800	1027900	1	5501500	5501600	1	14479100	14479200	1	9042600	9042700	4	27385100	27385200	1	32482400	32482500	2	22898300	22898400	2	14246500	14246600	2	1527600	1527700	1	36848900	36849000	2	12681200
1	5198400	5198500	1	3543000	3543100	1	9438800	9438900	1	10926100	10926200	1	9620700	9620800	1	5903600	5903700	2	1105400	1105500	1	5521800	5521900	1	14516500	14516600	1	9042800	9042900	4	27532800	27532900	1	32486700	32486800	2	23236300	23236400	2	14246600	14246700	2	1528500	1528600	1	36849000	36849100	2	13565100
1	5199700	5199800	1	3543100	3543200	1	9439200	9439300	1	10926200	10926300	1	9620800	9620900	1	5903700	5903800	2	1138400	1138500	1	5534400	5534500	1	14516600	14516700	1	9042900	9043000	4	27556600	27556700	1	32517200	32517300	2	23236400	23236500	2	14246700	14246800	2	1528600	1528700	1	36850800	36850900	2	13952400
1	5199800	5199900	1	3547200	3547300	1	9439300	9439400	1	10927600	10927700	1	9620900	9621000	1	5903900	5904000	2	1161800	1161900	1	5534500	5534600	1	14695600	14695700	1	9043300	9043400	4	27952500	27952600	1	32536900	32537000	2	23520900	23521000	2	14246800	14246900	2	1528700	1528800	1	37221800	37221900	2	14245700
1	5206600	5206700	1	3547300	3547400	1	9439500	9439600	1	10927700	10927800	1	9623100	9623200	1	5906200	5906300	2	1189200	1189300	1	5551700	5551800	1	14894300	14894400	1	9043800	9043900	4	28201300	28201400	1	32682400	32682500	2	23716200	23716300	2	14246900	14247000	2	1530400	1530500	1	37222200	37222300	2	14245900
1	5217100	5217200	1	3572000	3572100	1	9439600	9439700	1	10927800	10927900	1	9623300	9623400	1	5906500	5906600	2	1301800	1301900	1	5557400	5557500	1	14960400	14960500	1	9072100	9072200	4	28366500	28366600	1	32682500	32682600	2	24120000	24120100	2	14247000	14247100	2	1530500	1530600	1	37415300	37415400	2	14246000
1	5254600	5254700	1	3574500	3574600	1	9439700	9439800	1	10927900	10928000	1	9623400	9623500	1	5906600	5906700	2	1359800	1359900	1	5572000	5572100	1	14960500	14960600	1	9086700	9086800	4	28366600	28366700	1	32796000	32796100	2	24678900	24679000	2	14247100	14247200	2	1530600	1530700	1	37440100	37440200	2	14257300
1	5254700	5254800	1	3582600	3582700	1	9439800	9439900	1	10928000	10928100	1	9623800	9623900	1	5906700	5906800	2	1442100	1442200	1	5572100	5572200	1	14961200	14961300	1	9086800	9086900	4	28449300	28449400	1	32796100	32796200	2	25135000	25135100	2	14247500	14247600	2	1530700	1530800	1	37693600	37693700	2	14257400
1	5274100	5274200	1	3594000	3594100	1	9440300	9440400	1	10929100	10929200	1	9778300	9778400	1	6014400	6014500	2	1558100	1558200	1	5602900	5603000	1	14961300	14961400	1	9122400	9122500	4	30320100	30320200	1	32851100	32851200	2	25342700	25342800	2	14247600	14247700	2	1531500	1531600	1	38133300	38133400	2	14269900
1	5303200	5303300	1	3596300	3596400	1	9440400	9440500	1	10929200	10929300	1	9833800	9833900	1	6043100	6043200	2	1589200	1589300	1	5603000	5603100	1	14961400	14961500	1	9122500	9122600	4	30320200	30320300	1	32853400	32853500	2	25707500	25707600	2	14247900	14248000	2	1531600	1531700	1	38562300	38562400	2	14270000
1	5308700	5308800	1	3606800	3606900	1	9440500	9440600	1	10929300	10929400	1	9834000	9834100	1	6043200	6043300	2	1589300	1589400	1	5606300	5606400	1	14977600	14977700	1	9132600	9132700	4	31917800	31917900	1	32963900	32964000	2	25716900	25717000	2	14248000	14248100	2	1531700	1531800	1	38562400	38562500	2	14279100
1	5308800	5308900	1	3606900	3607000	1	9458400	9458500	1	10929400	10929500	1	9834200	9834300	1	6048700	6048800	2	1672500	1672600	1	5606400	5606500	1	14978300	14978400	1	9132700	9132800	4	32328300	32328400	1	33153600	33153700	2	25800700	25800800	2	14248200	14248300	2	1553100	1553200	1	38562500	38562600	2	14280800
1	5308900	5309000	1	3607500	3607600	1	9536600	9536700	1	10929500	10929600	1	9834900	9835000	1	6050300	6050400	2	1677800	1677900	1	5607300	5607400	1	15037900	15038000	1	9215100	9215200	4	32328400	32328500	1	33167700	33167800	2	25800800	25800900	2	14248500	14248600	2	1570000	1570100	1	38657900	38658000	2	14284900
1	5345100	5345200	1	3616900	3617000	1	9537600	9537700	1	10929600	10929700	1	9835300	9835400	1	6050400	6050500	2	1678000	1678100	1	5607400	5607500	1	15038000	15038100	1	9250000	9250100	4	32413500	32413600	1	33167900	33168000	2	26171300	26171400	2	14248600	14248700	2	1570100	1570200	1	38658200	38658300	2	14745100
1	5345200	5345300	1	3617000	3617100	1	9538500	9538600	1	10951800	10951900	1	9977800	9977900	1	6050500	6050600	2	2016400	2016500	1	5620700	5620800	1	15038100	15038200	1	9250100	9250200	4	32611600	32611700	1	33198000	33198100	2	26264100	26264200	2	14248700	14248800	2	1589200	1589300	1	38658300	38658400	2	14745200
1	5345300	5345400	1	3617400	3617500	1	9540900	9541000	1	10956300	10956400	1	10064600	10064700	1	6050600	6050700	2	2187500	2187600	1	5637300	5637400	1	15038200	15038300	1	9295800	9295900	4	32611700	32611800	1	33247200	33247300	2	26264800	26264900	2	14248800	14248900	2	1798000	1798100	1	38658400	38658500	2	14991700
1	5358100	5358200	1	3625600	3625700	1	9541300	9541400	1	10957300	10957400	1	10064700	10064800	1	6050800	6050900	2	2265100	2265200	1	5637600	5637700	1	15038400	15038500	1	9310500	9310600	4	32611800	32611900	1	33247300	33247400	2	26265000	26265100	2	14249000	14249100	2	2430500	2430600	1	38840600	38840700	2	14991800
1	5358200	5358300	1	3625800	3625900	1	9541900	9542000	1	10959000	10959100	1	10064800	10064900	1	6050900	6051000	2	2375700	2375800	1	5638500	5638600	1	15039800	15039900	1	9323400	9323500	4	32611900	32612000	1	33455200	33455300	2	26579700	26579800	2	14249100	14249200	2	2578800	2578900	1	38840700	38840800	2	14991900
1	5363700	5363800	1	3636400	3636500	1	9542200	9542300	1	11041400	11041500	1	10064900	10065000	1	6051100	6051200	2	2444100	2444200	1	5638600	5638700	1	15089500	15089600	1	9332700	9332800	4	33022200	33022300	1	33588400	33588500	2	26582400	26582500	2	14249300	14249400	2	2604700	2604800	1	38985900	38986000	2	14992000
1	5366000	5366100	1	3637100	3637200	1	9548300	9548400	1	11048600	11048700	1	10065000	10065100	1	6051200	6051300	2	2444200	2444300	1	5651000	5651100	1	15089600	15089700	1	9436200	9436300	4	33690100	33690200	1	33605700	33605800	2	26582500	26582600	2	14249400	14249500	2	3196100	3196200	1	39247200	39247300	2	14992100
1	5373300	5373400	1	3637200	3637300	1	9560100	9560200	1	11057300	11057400	1	10065200	10065300	1	6051300	6051400	2	2605200	2605300	1	5656100	5656200	1	15176200	15176300	1	9436300	9436400	4	34226100	34226200	1	33615100	33615200	2	26676800	26676900	2	14256300	14256400	2	3196200	3196300	1	39752600	39752700	2	14992300
1	5377700	5377800	1	3640200	3640300	1	9575700	9575800	1	11124700	11124800	1	10150800	10150900	1	6051400	6051500	2	2717000	2717100	1	5680500	5680600	1	15367000	15367100	1	9436500	9436600	4	34266800	34266900	1	33615200	33615300	2	27004100	27004200	2	14256400	14256500	2	3196300	3196400	1	39753200	39753300	2	14992400
1	5382400	5382500	1	3640300	3640400	1	9592000	9592100	1	11125300	11125400	1	10167100	10167200	1	6052000	6052100	2	2771200	2771300	1	5688000	5688100	1	15526900	15527000	1	9436600	9436700	4	34302800	34302900	1	33771700	33771800	2	27004200	27004300	2	14257300	14257400	2	3233800	3233900	1	39753300	39753400	2	14992500
1	5451800	5451900	1	3652100	3652200	1	9592200	9592300	1	11127700	11127800	1	10167200	10167300	1	6052100	6052200	2	2869300	2869400	1	5710100	5710200	1	15527600	15527700	1	9436700	9436800	4	34302900	34303000	1	33952700	33952800	2	27134000	27134100	2	14257400	14257500	2	3280700	3280800	1	39753400	39753500	2	14992600
1	5456100	5456200	1	3723400	3723500	1	9592300	9592400	1	11132600	11132700	1	10173700	10173800	1	6062500	6062600	2	2884100	2884200	1	5710300	5710400	1	15527700	15527800	1	9436800	9436900	4	34503100	34503200	1	33988600	33988700	2	27219800	27219900	2	14257500	14257600	2	3280800	3280900	1	39754500	39754600	2	14992700
1	5459100	5459200	1	3723500	3723600	1	9594100	9594200	1	11134800	11134900	1	10177000	10177100	1	6062600	6062700	2	2932700	2932800	1	5716200	5716300	1	15528000	15528100	1	9437000	9437100	4	34503200	34503300	1	34016900	34017000	2	27242800	27242900	2	14260700	14260800	2	3340700	3340800	1	39754600	39754700	2	14992900
1	5463100	5463200	1	3729500	3729600	1	9594200	9594300	1	11138900	11139000	1	10177100	10177200	1	6064100	6064200	2	2964200	2964300	1	5747300	5747400	1	15629300	15629400	1	9437100	9437200	4	34612200	34612300	1	34066400	34066500	2	28238000	28238100	2	14260900	14261000	2	3435800	3435900	1	39755200	39755300	2	14993000
1	5483000	5483100	1	3729700	3729800	1	9596700	9596800	1	11188400	11188500	1	10186100	10186200	1	6064300	6064400	2	2964300	2964400	1	5752600	5752700	1	16174200	16174300	1	9437200	9437300	4	34688300	34688400	1	34175200	34175300	2	28715300	28715400	2	14261200	14261300	2	3623200	3623300	1	39771400	39771500	2	14993100
1	5484500	5484600	1	3729800	3729900	1	9713200	9713300	1	11188800	11188900	1	10186300	10186400	1	6064500	6064600	2	2987000	2987100	1	5772800	5772900	1	16174600	16174700	1	9437300	9437400	4	35339200	35339300	1	34288800	34288900	2	28715400	28715500	2	14263200	14263300	2	3742200	3742300	1	39771500	39771600	2	14993300
1	5501500	5501600	1	3747800	3747900	1	9713300	9713400	1	11189000	11189100	1	10186400	10186500	1	6064600	6064700	2	3033900	3034000	1	5832200	5832300	1	16174700	16174800	1	9437400	9437500	4	35421800	35421900	1	34288900	34289000	2	28715500	28715600	2	14263300	14263400	2	3985600	3985700	1	40053100	40053200	2	14993400
1	5502000	5502100	1	3748500	3748600	1	9716900	9717000	1	11189200	11189300	1	10186500	10186600	1	6064700	6064800	2	3113300	3113400	1	5834600	5834700	1	16235500	16235600	1	9437500	9437600	5	375700	375800	1	34391300	34391400	2	28715600	28715700	2	14264700	14264800	2	4233900	4234000	1	40053200	40053300	2	14993500
1	5521800	5521900	1	3774300	3774400	1	9731300	9731400	1	11189300	11189400	1	10186700	10186800	1	6064800	6064900	2	3280800	3280900	1	5834700	5834800	1	16320900	16321000	1	9437600	9437700	5	777600	777700	1	34505300	34505400	2	28715700	28715800	2	14280200	14280300	2	4244900	4245000	1	40053300	40053400	2	14993600
1	5528800	5528900	1	3777900	3778000	1	9767700	9767800	1	11189400	11189500	1	10186800	10186900	1	6064900	6065000	2	3319700	3319800	1	5849400	5849500	1	16359200	16359300	1	9437700	9437800	5	782400	782500	1	34505400	34505500	2	28715800	28715900	2	14280300	14280400	2	4351700	4351800	1	40053500	40053600	2	15333500
1	5534200	5534300	1	3778000	3778100	1	9853000	9853100	1	11189800	11189900	1	10186900	10187000	1	6065000	6065100	2	3423800	3423900	1	5875500	5875600	1	16359300	16359400	1	9437800	9437900	5	782500	782600	1	34601700	34601800	2	28715900	28716000	2	14280700	14280800	2	4351800	4351900	1	40053600	40053700	2	15510200
1	5534400	5534500	1	3792000	3792100	1	9921700	9921800	1	11189900	11190000	1	10187200	10187300	1	6065100	6065200	2	3519600	3519700	1	5903500	5903600	1	16574600	16574700	1	9437900	9438000	5	994700	994800	1	34619000	34619100	2	28716000	28716100	2	14280800	14280900	2	4351900	4352000	1	40086100	40086200	2	15510300
1	5539400	5539500	1	3798600	3798700	1	9921800	9921900	1	11190000	11190100	1	10187300	10187400	1	6065200	6065300	2	3543400	3543500	1	5906600	5906700	1	16575200	16575300	1	9438000	9438100	5	1166000	1166100	1	34619200	34619300	2	28716100	28716200	2	14281400	14281500	2	4371900	4372000	1	40307400	40307500	2	15663300
1	5539500	5539600	1	3799200	3799300	1	9989600	9989700	1	11190100	11190200	1	10187400	10187500	1	6065300	6065400	2	3556400	3556500	1	5906700	5906800	1	16575300	16575400	1	9438100	9438200	5	1795000	1795100	1	34647000	34647100	2	28716200	28716300	2	14283500	14283600	2	5232200	5232300	1	40793700	40793800	2	15663400
1	5551700	5551800	1	3802900	3803000	1	9996700	9996800	1	11190200	11190300	1	10197500	10197600	1	6065400	6065500	2	3602200	3602300	1	5917300	5917400	1	16575400	16575500	1	9438200	9438300	5	2015400	2015500	1	34655900	34656000	2	28716300	28716400	2	14283600	14283700	2	5250100	5250200	1	40798000	40798100	2	16541600
1	5555400	5555500	1	3813800	3813900	1	9998400	9998500	1	11190400	11190500	1	10278300	10278400	1	6065500	6065600	2	3700000	3700100	1	5917500	5917600	1	16575700	16575800	1	9438300	9438400	5	2016800	2016900	1	34673200	34673300	2	28716400	28716500	2	14284100	14284200	2	5508500	5508600	1	40798100	40798200	2	16923100
1	5556200	5556300	1	3813900	3814000	1	9998500	9998600	1	11190500	11190600	1	10278400	10278500	1	6065600	6065700	2	3962300	3962400	1	5917600	5917700	1	16576000	16576100	1	9438400	9438500	5	2775800	2775900	1	34782400	34782500	2	28716500	28716600	2	14284200	14284300	2	5508600	5508700	1	40798800	40798900	2	18382200
1	5557600	5557700	1	3833600	3833700	1	9998600	9998700	1	11190600	11190700	1	10278600	10278700	1	6066400	6066500	2	3986100	3986200	1	5917700	5917800	1	16576300	16576400	1	9438500	9438600	5	2775900	2776000	1	34797500	34797600	2	28716600	28716700	2	14284900	14285000	2	5508900	5509000	1	40798900	40799000	2	18471200
1	5557800	5557900	1	3833700	3833800	1	9999400	9999500	1	11190700	11190800	1	10278700	10278800	1	6099700	6099800	2	4073000	4073100	1	5923300	5923400	1	16586000	16586100	1	9438600	9438700	5	3624200	3624300	1	34798300	34798400	2	28716700	28716800	2	14285000	14285100	2	5509000	5509100	1	40950700	40950800	2	18472400
1	5557900	5558000	1	3884300	3884400	1	10001300	10001400	1	11190800	11190900	1	10278800	10278900	1	6099800	6099900	2	4094200	4094300	1	5931300	5931400	1	16705200	16705300	1	9438700	9438800	5	3791300	3791400	1	34815100	34815200	2	28716800	28716900	2	14285100	14285200	2	5509200	5509300	1	41010700	41010800	2	18879200
1	5558000	5558100	1	3884400	3884500	1	10032600	10032700	1	11195500	11195600	1	10278900	10279000	1	6206600	6206700	2	4240700	4240800	1	5931400	5931500	1	17111700	17111800	1	9438800	9438900	5	3791400	3791500	1	34887000	34887100	2	28718800	28718900	2	14285200	14285300	2	5824000	5824100	1	41135900	41136000	2	18956200
1	5607300	5607400	1	3888800	3888900	1	10032700	10032800	1	11195600	11195700	1	10279000	10279100	1	6207600	6207700	2	4242900	4243000	1	5931500	5931600	1	17143600	17143700	1	9438900	9439000	5	3791500	3791600	1	35028700	35028800	2	28719300	28719400	2	14285400	14285500	2	5937500	5937600	1	41136500	41136600	2	19344900
1	5615300	5615400	1	3892600	3892700	1	10033300	10033400	1	11195800	11195900	1	10279200	10279300	1	6228700	6228800	2	4314100	4314200	1	5931600	5931700	1	17171200	17171300	1	9439000	9439100	5	3796700	3796800	1	35075600	35075700	2	28719400	28719500	2	14285600	14285700	2	6001400	6001500	1	41136600	41136700	2	19345000
1	5615600	5615700	1	3902500	3902600	1	10033400	10033500	1	11195900	11196000	1	10279300	10279400	1	6282000	6282100	2	4314200	4314300	1	5958300	5958400	1	17328500	17328600	1	9439100	9439200	5	3796800	3796900	1	35198800	35198900	2	28719500	28719600	2	14286200	14286300	2	6001500	6001600	1	41455800	41455900	2	19356100
1	5620400	5620500	1	3907700	3907800	1	10033500	10033600	1	11196000	11196100	1	10279400	10279500	1	6294700	6294800	2	4348600	4348700	1	5958400	5958500	1	17328600	17328700	1	9439200	9439300	5	3796900	3797000	1	35328000	35328100	2	28719600	28719700	2	14286400	14286500	2	6001600	6001700	1	41486700	41486800	2	19363500
1	5620700	5620800	1	3912000	3912100	1	10140900	10141000	1	11196100	11196200	1	10279500	10279600	1	6408100	6408200	2	4360300	4360400	1	5967600	5967700	1	17328700	17328800	1	9439300	9439400	5	3859700	3859800	1	35425300	35425400	2	28719700	28719800	2	14286600	14286700	2	6001700	6001800	1	41486800	41486900	2	19363600
1	5622000	5622100	1	3912500	3912600	1	10150800	10150900	1	11196200	11196300	1	10279600	10279700	1	6477000	6477100	2	4591000	4591100	1	5985900	5986000	1	17329000	17329100	1	9439400	9439500	5	3859800	3859900	1	35551600	35551700	2	28719800	28719900	2	14286700	14286800	2	6004000	6004100	1	42286700	42286800	2	19366000
1	5622200	5622300	1	3912600	3912700	1	10154000	10154100	1	11196300	11196400	1	10279700	10279800	1	6558600	6558700	2	4706600	4706700	1	5986700	5986800	1	17329100	17329200	1	9439500	9439600	5	5134400	5134500	1	35716300	35716400	2	28719900	28720000	2	14287200	14287300	2	6010800	6010900	1	42287000	42287100	2	19415400
1	5629700	5629800	1	3917000	3917100	1	10187900	10188000	1	11196500	11196600	1	10320500	10320600	1	6611900	6612000	2	4727100	4727200	1	5986800	5986900	1	17329700	17329800	1	9439600	9439700	5	5595800	5595900	1	35798800	35798900	2	28720000	28720100	2	14287500	14287600	2	6010900	6011000	1	42287100	42287200	2	19415500
1	5637500	5637600	1	3917100	3917200	1	10191000	10191100	1	11196800	11196900	1	10320600	10320700	1	6619500	6619600	2	4727200	4727300	1	6014400	6014500	1	17329800	17329900	1	9439700	9439800	5	5596700	5596800	1	35957800	35957900	2	28720100	28720200	2	14287600	14287700	2	6011000	6011100	1	42287200	42287300	2	19610900
1	5637600	5637700	1	3917200	3917300	1	10234400	10234500	1	11196900	11197000	1	10356500	10356600	1	6683500	6683600	2	4734700	4734800	1	6014500	6014600	1	17498800	17498900	1	9439800	9439900	5	5988100	5988200	1	36049900	36050000	2	28720200	28720300	2	14287700	14287800	2	6034100	6034200	1	42287300	42287400	2	19640000
1	5638600	5638700	1	3917300	3917400	1	10320500	10320600	1	11197200	11197300	1	10356800	10356900	1	6731800	6731900	2	4772300	4772400	1	6043100	6043200	1	17498900	17499000	1	9439900	9440000	5	6347300	6347400	1	36061300	36061400	2	28720300	28720400	2	14288600	14288700	2	6034200	6034300	1	42287400	42287500	2	19712600
1	5639000	5639100	1	3924100	3924200	1	10382300	10382400	1	11197300	11197400	1	10451500	10451600	1	6777200	6777300	2	4830700	4830800	1	6062500	6062600	1	17716600	17716700	1	9440300	9440400	5	6467900	6468000	1	36061400	36061500	2	28720400	28720500	2	14288700	14288800	2	6301100	6301200	1	42300400	42300500	2	20043700
1	5639100	5639200	1	3943400	3943500	1	10451500	10451600	1	11197400	11197500	1	10577200	10577300	1	6851400	6851500	2	5235000	5235100	1	6062600	6062700	1	17820000	17820100	1	9440400	9440500	5	7378000	7378100	1	36119100	36119200	2	28720500	28720600	2	15510200	15510300	2	6696200	6696300	1	42444800	42444900	2	20655600
1	5651100	5651200	1	3944200	3944300	1	10461700	10461800	1	11197500	11197600	1	10592200	10592300	1	6865200	6865300	2	5442400	5442500	1	6074500	6074600	1	17823900	17824000	1	9440500	9440600	5	7444300	7444400	1	36129100	36129200	2	28720600	28720700	2	15510300	15510400	2	6696300	6696400	1	42444900	42445000	2	20770200
1	5657100	5657200	1	3944300	3944400	1	10592200	10592300	1	11197600	11197700	1	10592300	10592400	1	6865300	6865400	2	5521700	5521800	1	6074600	6074700	1	18072300	18072400	1	9440600	9440700	5	7829800	7829900	1	36197400	36197500	2	28720700	28720800	2	15663400	15663500	2	7520700	7520800	1	42476300	42476400	2	21024200
1	5658100	5658200	1	3944600	3944700	1	10592300	10592400	1	11197700	11197800	1	10798300	10798400	1	6949200	6949300	2	5636400	5636500	1	6088100	6088200	1	18197100	18197200	1	9458400	9458500	5	7853800	7853900	1	36262800	36262900	2	28720800	28720900	2	15769200	15769300	2	7520800	7520900	1	42492600	42492700	2	21024300
1	5660100	5660200	1	3946300	3946400	1	10656900	10657000	1	11197800	11197900	1	10798400	10798500	1	6955000	6955100	2	5813600	5813700	1	6088200	6088300	1	18599800	18599900	1	9459500	9459600	5	8234600	8234700	1	36378900	36379000	2	28720900	28721000	2	15842100	15842200	2	7622400	7622500	1	42492700	42492800	2	21024500
1	5660200	5660300	1	3946400	3946500	1	10858500	10858600	1	11197900	11198000	1	10798900	10799000	1	6955600	6955700	2	5824000	5824100	1	6097200	6097300	1	18600200	18600300	1	9459600	9459700	5	8366500	8366600	1	36379000	36379100	2	28721000	28721100	2	15956700	15956800	2	8055800	8055900	1	42492800	42492900	2	21042900
1	5661200	5661300	1	3950400	3950500	1	10859800	10859900	1	11198100	11198200	1	10799000	10799100	1	6977000	6977100	2	5824100	5824200	1	6097500	6097600	1	18898700	18898800	1	9547300	9547400	5	8922000	8922100	1	36410400	36410500	2	28721400	28721500	2	16043300	16043400	2	8519900	8520000	1	42492900	42493000	2	21164800
1	5661300	5661400	1	3964700	3964800	1	10861700	10861800	1	11198300	11198400	1	11047900	11048000	1	7153400	7153500	2	5886000	5886100	1	6097600	6097700	1	19040200	19040300	1	9547400	9547500	5	8922100	8922200	1	36492700	36492800	2	28721500	28721600	2	16556100	16556200	2	8524100	8524200	1	42493000	42493100	2	21164900
1	5682600	5682700	1	3967100	3967200	1	10861800	10861900	1	11198600	11198700	1	11048000	11048100	1	7153500	7153600	2	6022100	6022200	1	6097700	6097800	1	19224700	19224800	1	9547500	9547600	5	8922200	8922300	1	36523800	36523900	2	28721600	28721700	2	16589500	16589600	2	8526100	8526200	1	42493200	42493300	2	21502400
1	5735100	5735200	1	3967200	3967300	1	10862600	10862700	1	11198700	11198800	1	11099100	11099200	1	7153700	7153800	2	6215700	6215800	1	6098300	6098400	1	19634300	19634400	1	9586000	9586100	5	8927400	8927500	1	36792200	36792300	2	28721700	28721800	2	17050300	17050400	2	8527200	8527300	1	42500200	42500300	2	21517900
1	5752200	5752300	1	3970100	3970200	1	10863300	10863400	1	11198800	11198900	1	11099200	11099300	1	7153900	7154000	2	6465200	6465300	1	6098800	6098900	1	19706100	19706200	1	9595800	9595900	5	8927500	8927600	1	36974500	36974600	2	28721800	28721900	2	17457900	17458000	2	8528600	8528700	1	42513100	42513200	2	22076600
1	5752300	5752400	1	3972300	3972400	1	10916100	10916200	1	11198900	11199000	1	11099500	11099600	1	7154000	7154100	2	6509700	6509800	1	6098900	6099000	1	19801000	19801100	1	9702000	9702100	5	8927600	8927700	1	37054100	37054200	2	28721900	28722000	2	17458000	17458100	2	8530100	8530200	1	42525100	42525200	2	22076700
1	5755300	5755400	1	3972400	3972500	1	10924600	10924700	1	11199000	11199100	1	11099600	11099700	1	7154400	7154500	2	6770000	6770100	1	6099700	6099800	1	19862500	19862600	1	9713300	9713400	5	9429600	9429700	1	37331800	37331900	2	29074100	29074200	2	17636600	17636700	2	8532300	8532400	1	42793100	42793200	2	22162700
1	5755400	5755500	1	3998400	3998500	1	10925200	10925300	1	11199100	11199200	1	11099700	11099800	1	7154500	7154600	2	6770100	6770200	1	6099800	6099900	1	19892200	19892300	1	9764600	9764700	5	9541500	9541600	1	37599200	37599300	2	29074200	29074300	2	18051300	18051400	2	8534100	8534200	1	42830800	42830900	2	22168600
1	5772800	5772900	1	3998500	3998600	1	10926000	10926100	1	11199200	11199300	1	11100200	11100300	1	7154700	7154800	2	6852600	6852700	1	6109000	6109100	1	20294700	20294800	1	9774000	9774100	5	13414600	13414700	1	37605000	37605100	2	29154500	29154600	2	18051400	18051500	2	8534200	8534300	1	42855200	42855300	2	22263900
1	5772900	5773000	1	4013800	4013900	1	10926100	10926200	1	11199400	11199500	1	11100300	11100400	1	7154800	7154900	2	7048800	7048900	1	6206600	6206700	1	20651100	20651200	1	9774100	9774200	5	14739300	14739400	1	37607500	37607600	2	29154600	29154700	2	18562800	18562900	2	8792400	8792500	1	43020700	43020800	2	22888400
1	5780900	5781000	1	4020000	4020100	1	10926200	10926300	1	11199700	11199800	1	11100500	11100600	1	7154900	7155000	2	7136600	7136700	1	6228600	6228700	1	20810500	20810600	1	9778200	9778300	5	15002100	15002200	1	37607600	37607700	2	29164200	29164300	2	19344900	19345000	2	8792500	8792600	1	43025600	43025700	2	22888500
1	5786600	5786700	1	4022200	4022300	1	10927800	10927900	1	11205000	11205100	1	11101100	11101200	1	7155200	7155300	2	7227200	7227300	1	6229000	6229100	1	20810900	20811000	1	9778300	9778400	5	15896200	15896300	1	37615600	37615700	2	29448700	29448800	2	19345000	19345100	2	8792600	8792700	1	43025700	43025800	2	22898200
1	5846100	5846200	1	4032800	4032900	1	10927900	10928000	1	11272000	11272100	1	11105800	11105900	1	7155700	7155800	2	7234700	7234800	1	6238500	6238600	1	20811000	20811100	1	9908300	9908400	5	16172200	16172300	1	37615700	37615800	2	29448800	29448900	2	19414500	19414600	2	8792700	8792800	1	43182500	43182600	2	22898400
1	5846200	5846300	1	4044700	4044800	1	10929600	10929700	1	11316100	11316200	1	11109100	11109200	1	7160300	7160400	2	7261400	7261500	1	6246700	6246800	1	20811200	20811300	1	9908400	9908500	5	16177600	16177700	1	37617800	37617900	2	29669600	29669700	2	19414600	19414700	2	8792800	8792900	1	43182700	43182800	2	22898600
1	5846300	5846400	1	4047300	4047400	1	10959000	10959100	1	11341800	11341900	1	11121100	11121200	1	7160400	7160500	2	7448900	7449000	1	6246800	6246900	1	20811300	20811400	1	9948000	9948100	5	16177800	16177900	1	37934400	37934500	2	30290900	30291000	2	19414800	19414900	2	8792900	8793000	1	43183200	43183300	2	22898700
1	5847800	5847900	1	4047600	4047700	1	11041400	11041500	1	11362100	11362200	1	11121200	11121300	1	7160500	7160600	2	7538600	7538700	1	6272200	6272300	1	20813700	20813800	1	9956700	9956800	5	17127600	17127700	1	37940500	37940600	2	30291000	30291100	2	19414900	19415000	2	8942900	8943000	1	43199600	43199700	2	22898800
1	5875500	5875600	1	4047700	4047800	1	11048700	11048800	1	11362200	11362300	1	11194900	11195000	1	7160600	7160700	2	7588300	7588400	1	6282000	6282100	1	20914200	20914300	1	9960300	9960400	5	17327400	17327500	1	37941000	37941100	2	30313300	30313400	2	19415500	19415600	2	9088600	9088700	2	591300	591400	2	22898900
1	5884900	5885000	1	4048200	4048300	1	11124700	11124800	1	11362300	11362400	1	11327000	11327100	1	7160700	7160800	2	7628600	7628700	1	6288000	6288100	1	20960000	20960100	1	9979100	9979200	5	17772700	17772800	1	37941100	37941200	2	31316200	31316300	2	19416100	19416200	2	9093100	9093200	2	612900	613000	2	23145500
1	5903600	5903700	1	4055600	4055700	1	11125300	11125400	1	11362400	11362500	1	11332700	11332800	1	7160800	7160900	2	7845300	7845400	1	6294300	6294400	1	20982400	20982500	1	9983600	9983700	5	18404300	18404400	1	37979500	37979600	2	31529300	31529400	2	19416200	19416300	2	9093200	9093300	2	613100	613200	2	23171300
1	5906700	5906800	1	4055800	4055900	1	11125500	11125600	1	11362500	11362600	1	11333000	11333100	1	7160900	7161000	2	8803600	8803700	1	6294400	6294500	1	20985200	20985300	1	9984300	9984400	5	18747800	18747900	1	38042700	38042800	2	31529400	31529500	2	19674200	19674300	2	9093300	9093400	2	613200	613300	2	23518600
1	5917000	5917100	1	4055900	4056000	1	11126800	11126900	1	11362600	11362700	1	11333300	11333400	1	7161000	7161100	2	8997400	8997500	1	6302800	6302900	1	20985300	20985400	1	9989500	9989600	5	18749300	18749400	1	38057900	38058000	2	31575100	31575200	2	20770300	20770400	2	9093400	9093500	2	613400	613500	2	23647100
1	5917100	5917200	1	4056000	4056100	1	11127700	11127800	1	11362700	11362800	1	11333600	11333700	1	7161100	7161200	2	9057600	9057700	1	6302900	6303000	1	21008600	21008700	1	9989600	9989700	5	19328900	19329000	1	38058000	38058100	2	31813000	31813100	2	21024200	21024300	2	9093500	9093600	2	613500	613600	2	23647200
1	5917600	5917700	1	4056100	4056200	1	11127800	11127900	1	11362800	11362900	1	11333800	11333900	1	7161200	7161300	2	9114100	9114200	1	6308200	6308300	1	21009400	21009500	1	9998700	9998800	5	20173000	20173100	1	38244100	38244200	2	32252500	32252600	2	21024300	21024400	2	9093600	9093700	2	634000	634100	2	23716100
1	5917700	5917800	1	4078700	4078800	1	11132600	11132700	1	11362900	11363000	1	11333900	11334000	1	7161300	7161400	2	9440100	9440200	1	6308300	6308400	1	21009500	21009600	1	9999400	9999500	5	20205900	20206000	1	38364200	38364300	2	32655000	32655100	2	21043000	21043100	2	9096900	9097000	2	634500	634600	2	23716200
1	5931600	5931700	1	4126600	4126700	1	11135100	11135200	1	11363000	11363100	1	11334200	11334300	1	7161400	7161500	2	9454000	9454100	1	6354700	6354800	1	21009600	21009700	1	10000600	10000700	5	20253100	20253200	1	38393300	38393400	2	32694300	32694400	2	21164900	21165000	2	9097000	9097100	2	634600	634700	2	23768800
1	5999700	5999800	1	4151100	4151200	1	11169600	11169700	1	11363200	11363300	1	11334300	11334400	1	7161500	7161600	2	9470300	9470400	1	6356000	6356100	1	21010100	21010200	1	10001200	10001300	5	20253200	20253300	1	38393400	38393500	2	32694400	32694500	2	21447500	21447600	2	9602300	9602400	2	782600	782700	2	24121300
1	6014400	6014500	1	4154900	4155000	1	11189200	11189300	1	11363300	11363400	1	11334500	11334600	1	7161600	7161700	2	9470400	9470500	1	6356100	6356200	1	21504300	21504400	1	10001300	10001400	5	20977100	20977200	1	38408600	38408700	2	33428900	33429000	2	21502300	21502400	2	9602400	9602500	2	783600	783700	2	24380100
1	6031000	6031100	1	4166100	4166200	1	11190800	11190900	1	11363400	11363500	1	11334600	11334700	1	7161700	7161800	2	9635800	9635900	1	6382100	6382200	1	21504400	21504500	1	10031400	10031500	5	21014500	21014600	1	38500700	38500800	2	34280500	34280600	2	22051400	22051500	2	10231200	10231300	2	783800	783900	2	24564100
1	6040200	6040300	1	4167100	4167200	1	11196100	11196200	1	11363500	11363600	1	11385700	11385800	1	7161800	7161900	2	9848000	9848100	1	6382200	6382300	1	21670400	21670500	1	10031500	10031600	5	22133000	22133100	1	38558600	38558700	2	34561700	34561800	2	22076700	22076800	2	10270800	10270900	2	783900	784000	2	24564200
1	6043100	6043200	1	4176100	4176200	1	11196200	11196300	1	11363600	11363700	1	11397300	11397400	1	7161900	7162000	2	9925200	9925300	1	6408000	6408100	1	21759600	21759700	1	10031800	10031900	5	22234000	22234100	1	38665900	38666000	2	34561800	34561900	2	22162700	22162800	2	10335100	10335200	2	784300	784400	2	24564300
1	6043400	6043500	1	4184100	4184200	1	11196300	11196400	1	11363800	11363900	1	11397400	11397500	1	7162000	7162100	2	9925300	9925400	1	6408100	6408200	1	21866500	21866600	1	10032200	10032300	5	22235900	22236000	1	38724700	38724800	2	34561900	34562000	2	22263900	22264000	2	10335200	10335300	2	784400	784500	2	24564400
1	6043500	6043600	1	4184200	4184300	1	11197200	11197300	1	11364000	11364100	1	11397700	11397800	1	7162400	7162500	2	10010500	10010600	1	6408200	6408300	1	21866600	21866700	1	10032300	10032400	5	22263000	22263100	1	38728200	38728300	2	34745300	34745400	2	22300400	22300500	2	10335300	10335400	2	807700	807800	2	24564500
1	6062500	6062600	1	4184300	4184400	1	11197300	11197400	1	11364100	11364200	1	11397800	11397900	1	7162600	7162700	2	10157200	10157300	1	6408300	6408400	1	21866700	21866800	1	10032400	10032500	5	23343900	23344000	1	38863800	38863900	2	34745400	34745500	2	22521000	22521100	2	10565500	10565600	2	811500	811600	2	24564600
1	6062600	6062700	1	4185800	4185900	1	11197700	11197800	1	11367700	11367800	1	11398100	11398200	1	7162700	7162800	2	10207000	10207100	1	6416000	6416100	1	22005100	22005200	1	10032500	10032600	5	23362900	23363000	1	39003900	39004000	2	34745500	34745600	2	22564100	22564200	2	10612000	10612100	2	811700	811800	2	24564700
1	6074800	6074900	1	4185900	4186000	1	11197900	11198000	1	11421800	11421900	1	11398200	11398300	1	7162800	7162900	2	10237800	10237900	1	6417200	6417300	1	22005200	22005300	1	10032600	10032700	5	24723800	24723900	1	39012600	39012700	2	34760000	34760100	2	22564200	22564300	2	10612100	10612200	2	814700	814800	2	24574000
1	6088100	6088200	1	4193800	4193900	1	11198000	11198100	1	11421900	11422000	1	11398300	11398400	1	7162900	7163000	2	10533400	10533500	1	6423100	6423200	1	22370900	22371000	1	10033300	10033400	5	24727400	24727500	1	39012700	39012800	2	34760100	34760200	2	22888500	22888600	2	10612200	10612300	2	814900	815000	2	24574100
1	6097400	6097500	1	4194200	4194300	1	11198100	11198200	1	11469700	11469800	1	11404800	11404900	1	7163000	7163100	2	10533500	10533600	1	6441000	6441100	1	22475900	22476000	1	10033400	10033500	5	24728800	24728900	1	39099400	39099500	2	35256800	35256900	2	22898200	22898300	2	10616800	10616900	2	815000	815100	2	24678800
1	6097500	6097600	1	4205100	4205200	1	11348700	11348800	1	11470900	11471000	1	11441700	11441800	1	7163100	7163200	2	10533600	10533700	1	6441100	6441200	1	22476000	22476100	1	10056700	10056800	5	25319000	25319100	1	39151400	39151500	2	35636500	35636600	2	22898300	22898400	2	10616900	10617000	2	815100	815200	2	24678900
1	6098800	6098900	1	4205200	4205300	1	11362200	11362300	1	11471200	11471300	1	11450300	11450400	1	7163200	7163300	2	10719500	10719600	1	6441200	6441300	1	22476100	22476200	1	10056800	10056900	5	25321000	25321100	1	39330100	39330200	2	35800200	35800300	2	22898400	22898500	2	10617000	10617100	2	815500	815600	2	24717700
1	6099800	6099900	1	4205300	4205400	1	11362400	11362500	1	11471300	11471400	1	11450400	11450500	1	7163300	7163400	2	10770600	10770700	1	6468600	6468700	1	22639500	22639600	1	10065000	10065100	5	25430100	25430200	1	39380600	39380700	3	248300	248400	2	22898500	22898600	2	10619800	10619900	2	815800	815900	2	24954300
1	6109000	6109100	1	4207900	4208000	1	11362600	11362700	1	11471400	11471500	1	11480200	11480300	1	7163400	7163500	2	10775800	10775900	1	6477500	6477600	1	23143200	23143300	1	10140600	10140700	5	25445300	25445400	1	39419500	39419600	3	249400	249500	2	22898600	22898700	2	10630300	10630400	2	816000	816100	2	24954400
1	6119200	6119300	1	4208000	4208100	1	11362700	11362800	1	11471500	11471600	1	11480300	11480400	1	7163500	7163600	2	10873300	10873400	1	6494300	6494400	1	23252700	23252800	1	10187900	10188000	5	25554400	25554500	1	39537900	39538000	3	744100	744200	2	22898700	22898800	2	10630400	10630500	2	816100	816200	2	25583100
1	6154900	6155000	1	4221700	4221800	1	11362800	11362900	1	11471600	11471700	1	11480900	11481000	1	7163600	7163700	2	10905600	10905700	1	6538600	6538700	1	23252800	23252900	1	10237200	10237300	5	26275300	26275400	1	39574200	39574300	3	1444200	1444300	2	22898800	22898900	2	10631000	10631100	2	847100	847200	2	26263400
1	6204500	6204600	1	4244700	4244800	1	11363000	11363100	1	11471700	11471800	1	11490300	11490400	1	7163700	7163800	2	11020000	11020100	1	6558600	6558700	1	23252900	23253000	1	10260900	10261000	5	26840500	26840600	1	39606400	39606500	3	1691700	1691800	2	22898900	22899000	2	10631100	10631200	2	847600	847700	2	26263500
1	6216300	6216400	1	4244800	4244900	1	11363300	11363400	1	11471800	11471900	1	11521800	11521900	1	7163800	7163900	2	11179300	11179400	1	6559700	6559800	1	23253400	23253500	1	10320500	10320600	5	27081900	27082000	1	39976200	39976300	3	1715800	1715900	2	23716200	23716300	2	10631300	10631400	2	847800	847900	2	26263900
1	6220200	6220300	1	4261700	4261800	1	11363400	11363500	1	11471900	11472000	1	11522100	11522200	1	7163900	7164000	2	11179400	11179500	1	6559800	6559900	1	23253500	23253600	1	10320600	10320700	5	27082000	27082100	1	40005400	40005500	3	1824600	1824700	2	24564400	24564500	2	10642700	10642800	2	847900	848000	2	26264000
1	6225300	6225400	1	4262700	4262800	1	11363500	11363600	1	11472000	11472100	1	11524700	11524800	1	7164000	7164100	2	11348800	11348900	1	6596200	6596300	1	23253600	23253700	1	10344800	10344900	5	27185400	27185500	1	40033600	40033700	3	1889500	1889600	2	24564700	24564800	2	10642800	10642900	2	848000	848100	2	26264300
1	6228700	6228800	1	4279300	4279400	1	11397300	11397400	1	11472300	11472400	1	11524800	11524900	1	7164300	7164400	2	11383300	11383400	1	6596300	6596400	1	23253800	23253900	1	10367700	10367800	5	27433000	27433100	1	40061200	40061300	3	1889600	1889700	2	24717600	24717700	2	10644900	10645000	2	848100	848200	2	26264600
1	6229000	6229100	1	4279400	4279500	1	11450300	11450400	1	11472700	11472800	1	11557700	11557800	1	7164600	7164700	2	11957500	11957600	1	6599000	6599100	1	23253900	23254000	1	10385700	10385800	5	27583800	27583900	1	40164500	40164600	3	1892300	1892400	2	24717700	24717800	2	10654800	10654900	2	848200	848300	2	26264700
1	6232800	6232900	1	4279800	4279900	1	11450400	11450500	1	11472800	11472900	1	11557800	11557900	1	7164700	7164800	2	11984200	11984300	1	6602600	6602700	1	23254600	23254700	1	10427600	10427700	5	27583900	27584000	1	40279800	40279900	3	2606600	2606700	2	25538500	25538600	2	10676200	10676300	2	848300	848400	2	26264800
1	6281900	6282000	1	4285000	4285100	1	11471200	11471300	1	11472900	11473000	1	11645300	11645400	1	7164900	7165000	2	12058200	12058300	1	6608600	6608700	1	23332600	23332700	1	10427700	10427800	5	27842400	27842500	1	40469300	40469400	3	2947400	2947500	2	25800700	25800800	2	10837600	10837700	2	848400	848500	2	26264900
1	6282000	6282100	1	4285100	4285200	1	11471400	11471500	1	11473000	11473100	1	11653300	11653400	1	7165000	7165100	2	12133600	12133700	1	6611900	6612000	1	23355300	23355400	1	10427800	10427900	5	28489400	28489500	1	40469500	40469600	3	2948200	2948300	2	25800800	25800900	2	10837700	10837800	2	957300	957400	2	26265000
1	6294300	6294400	1	4285200	4285300	1	11471500	11471600	1	11473100	11473200	1	11786400	11786500	1	7165100	7165200	2	12477300	12477400	1	6619500	6619600	1	23590600	23590700	1	10428600	10428700	5	28489500	28489600	1	40469600	40469700	3	2957400	2957500	2	26130100	26130200	2	10897300	10897400	2	1006100	1006200	2	26404300
1	6294400	6294500	1	4295100	4295200	1	11471600	11471700	1	11473200	11473300	1	11786500	11786600	1	7165200	7165300	2	12599900	12600000	1	6645500	6645600	1	23926600	23926700	1	10461700	10461800	6	530700	530800	1	40689500	40689600	3	3525800	3525900	2	26264100	26264200	2	10897400	10897500	2	1006200	1006300	2	26579700
1	6302000	6302100	1	4296500	4296600	1	11471700	11471800	1	11473300	11473400	1	11886300	11886400	1	7165300	7165400	2	12607800	12607900	1	6646600	6646700	1	23926700	23926800	1	10569000	10569100	6	601100	601200	1	40779300	40779400	3	4336300	4336400	2	26478300	26478400	2	10897500	10897600	2	1006700	1006800	2	26582400
1	6302300	6302400	1	4305400	4305500	1	11471800	11471900	1	11473500	11473600	1	11928700	11928800	1	7165400	7165500	2	12712700	12712800	1	6646700	6646800	1	24201700	24201800	1	10605800	10605900	6	601200	601300	1	41041700	41041800	3	4766400	4766500	2	26579700	26579800	2	10897600	10897700	2	1079700	1079800	2	26582500
1	6302900	6303000	1	4305900	4306000	1	11471900	11472000	1	11473600	11473700	1	11928800	11928900	1	7165500	7165600	2	12740200	12740300	1	6687300	6687400	1	24202100	24202200	1	10606000	10606100	6	687800	687900	1	41042400	41042500	3	5012100	5012200	2	26582400	26582500	2	10897700	10897800	2	1480600	1480700	2	27134000
1	6315100	6315200	1	4319100	4319200	1	11472000	11472100	1	11473700	11473800	1	11929000	11929100	1	7165600	7165700	2	12740300	12740400	1	6731800	6731900	1	24202300	24202400	1	10606100	10606200	6	702300	702400	1	41108300	41108400	3	5159400	5159500	2	26582500	26582600	2	10897800	10897900	2	1487700	1487800	2	27134100
1	6323300	6323400	1	4350800	4350900	1	11472100	11472200	1	11473800	11473900	1	11929300	11929400	1	7165700	7165800	2	12891700	12891800	1	6731900	6732000	1	24204300	24204400	1	10834500	10834600	6	818700	818800	1	41148700	41148800	3	5159500	5159600	2	26676800	26676900	2	10931600	10931700	2	1553100	1553200	2	28715300
1	6356000	6356100	1	4350900	4351000	1	11472200	11472300	1	11473900	11474000	1	11929600	11929700	1	7165800	7165900	2	13021600	13021700	1	6802900	6803000	1	24372400	24372500	1	10852800	10852900	6	895200	895300	1	41179000	41179100	3	5490700	5490800	2	26935100	26935200	2	10931700	10931800	2	1925900	1926000	2	28715500
1	6408000	6408100	1	4351900	4352000	1	11472300	11472400	1	11474000	11474100	1	11937900	11938000	1	7165900	7166000	2	13162000	13162100	1	6819200	6819300	1	24743100	24743200	1	10862600	10862700	6	895300	895400	1	41188900	41189000	3	5828200	5828300	2	27134000	27134100	2	10931800	10931900	2	1926000	1926100	2	28715600
1	6408100	6408200	1	4371800	4371900	1	11472600	11472700	1	11474100	11474200	1	11938300	11938400	1	7166000	7166100	2	13162100	13162200	1	6819600	6819700	1	24746600	24746700	1	10862700	10862800	6	1276100	1276200	1	41260800	41260900	3	6532900	6533000	2	27134100	27134200	2	10931900	10932000	2	1931400	1931500	2	28715900
1	6408300	6408400	1	4373400	4373500	1	11472700	11472800	1	11474200	11474300	1	11938500	11938600	1	7168000	7168100	2	13162200	13162300	1	6824000	6824100	1	24746700	24746800	1	10862800	10862900	6	1276200	1276300	1	41260900	41261000	3	6673200	6673300	2	27198600	27198700	2	10932000	10932100	2	2195700	2195800	2	28716100
1	6423100	6423200	1	4403200	4403300	1	11472800	11472900	1	11474300	11474400	1	11938900	11939000	1	7168100	7168200	2	13162300	13162400	1	6851400	6851500	1	24746800	24746900	1	10863600	10863700	6	1287400	1287500	1	41307400	41307500	3	6673300	6673400	2	27242800	27242900	2	10932100	10932200	2	2196100	2196200	2	28716300
1	6441000	6441100	1	4403600	4403700	1	11472900	11473000	1	11474400	11474500	1	11948300	11948400	1	7168500	7168600	2	13316400	13316500	1	6862900	6863000	1	24746900	24747000	1	10863700	10863800	6	1287500	1287600	1	41315300	41315400	3	6684000	6684100	2	28238000	28238100	2	10932200	10932300	2	2196200	2196300	2	28716800
1	6441200	6441300	1	4409700	4409800	1	11473100	11473200	1	11474500	11474600	1	11966700	11966800	1	7168600	7168700	2	13476100	13476200	1	6882900	6883000	1	24747400	24747500	1	10863800	10863900	6	1287600	1287700	1	41327000	41327100	3	7016800	7016900	2	28309100	28309200	2	10932300	10932400	2	2266400	2266500	2	28719300
1	6477500	6477600	1	4410200	4410300	1	11473200	11473300	1	11474600	11474700	1	11966800	11966900	1	7168900	7169000	2	13949000	13949100	1	6883000	6883100	1	24789500	24789600	1	10864400	10864500	6	2722900	2723000	1	41354900	41355000	3	7102900	7103000	2	28715300	28715400	2	10932400	10932500	2	2297600	2297700	2	28719500
1	6489600	6489700	1	4412200	4412300	1	11473300	11473400	1	11474800	11474900	1	12005900	12006000	1	7169000	7169100	2	14362300	14362400	1	6883100	6883200	1	25100200	25100300	1	10916000	10916100	6	2743300	2743400	1	41561300	41561400	3	7103100	7103200	2	28715400	28715500	2	10932500	10932600	2	2298300	2298400	2	28719600
1	6489700	6489800	1	4442400	4442500	1	11473900	11474000	1	11474900	11475000	1	12006000	12006100	1	7169100	7169200	2	14414400	14414500	1	6927500	6927600	1	25110400	25110500	1	10916100	10916200	6	3426700	3426800	1	41779400	41779500	3	7103400	7103500	2	28715500	28715600	2	11135800	11135900	2	2298600	2298700	2	28719700
1	6539700	6539800	1	4448400	4448500	1	11474000	11474100	1	11475000	11475100	1	12006100	12006200	1	7169200	7169300	2	14687400	14687500	1	6939200	6939300	1	25110500	25110600	1	10916200	10916300	6	3669600	3669700	1	41844700	41844800	3	7103800	7103900	2	28715600	28715700	2	11195900	11196000	2	2299100	2299200	2	28719800
1	6558600	6558700	1	4453100	4453200	1	11491300	11491400	1	11475100	11475200	1	12006500	12006600	1	7169300	7169400	2	15214200	15214300	1	6949200	6949300	1	25110700	25110800	1	10923200	10923300	6	4195700	4195800	1	41854900	41855000	3	7956200	7956300	2	28715700	28715800	2	11196000	11196100	2	2577900	2578000	2	28720000
1	6579300	6579400	1	4469400	4469500	1	11509800	11509900	1	11503300	11503400	1	12006800	12006900	1	7169500	7169600	2	15214300	15214400	1	6965900	6966000	1	25110800	25110900	1	10923400	10923500	6	4406800	4406900	1	41943700	41943800	3	7956300	7956400	2	28715800	28715900	2	11897200	11897300	2	2585900	2586000	2	28720100
1	6579400	6579500	1	4469700	4469800	1	11509900	11510000	1	11509900	11510000	1	12006900	12007000	1	7170500	7170600	2	15368600	15368700	1	6977000	6977100	1	25111200	25111300	1	10923500	10923600	6	4406900	4407000	1	42100600	42100700	3	7956600	7956700	2	28715900	28716000	2	11897300	11897400	2	2588200	2588300	2	28720300
1	6586200	6586300	1	4469800	4469900	1	11510200	11510300	1	11510200	11510300	1	12029800	12029900	1	7170700	7170800	2	15466600	15466700	1	6977100	6977200	1	25111300	25111400	1	10923600	10923700	6	4555600	4555700	1	42122000	42122100	3	8825400	8825500	2	28716000	28716100	2	11897400	11897500	2	2614900	2615000	2	28720500
1	6586300	6586400	1	4483800	4483900	1	11557700	11557800	1	11660700	11660800	1	12170900	12171000	1	7170800	7170900	2	15486400	15486500	1	6978700	6978800	1	25111900	25112000	1	10923900	10924000	6	4622000	4622100	1	42122100	42122200	3	8825500	8825600	2	28716100	28716200	2	11901200	11901300	2	2716300	2716400	2	28720700
1	6596200	6596300	1	4493900	4494000	1	11557800	11557900	1	11666700	11666800	1	12171000	12171100	1	7171000	7171100	2	15694600	15694700	1	6981900	6982000	1	25252800	25252900	1	10924000	10924100	6	4622100	4622200	1	42250100	42250200	3	10086300	10086400	2	28716200	28716300	2	11901500	11901600	2	2988300	2988400	2	28720800
1	6596300	6596400	1	4525100	4525200	1	11628900	11629000	1	11674000	11674100	1	12214700	12214800	1	7171200	7171300	2	15956100	15956200	1	7036700	7036800	1	25253500	25253600	1	10924200	10924300	6	5162600	5162700	1	42301500	42301600	3	10134100	10134200	2	28716300	28716400	2	11902500	11902600	2	3196100	3196200	2	28721100
1	6598900	6599000	1	4550500	4550600	1	11668200	11668300	1	11674200	11674300	1	12214800	12214900	1	7171400	7171500	2	16204800	16204900	1	7036800	7036900	1	25254300	25254400	1	10924300	10924400	6	5268600	5268700	1	42301600	42301700	3	10134200	10134300	2	28716400	28716500	2	11902600	11902700	2	3196200	3196300	2	28721200
1	6599000	6599100	1	4554600	4554700	1	11720000	11720100	1	11720000	11720100	1	12214900	12215000	1	7171500	7171600	2	16238300	16238400	1	7070700	7070800	1	25312300	25312400	1	10924400	10924500	6	5300600	5300700	1	42411200	42411300	3	10134400	10134500	2	28716500	28716600	2	12092900	12093000	2	3196300	3196400	2	28721400
1	6599100	6599200	1	4560400	4560500	1	11723900	11724000	1	11720200	11720300	1	12215000	12215100	1	7171600	7171700	2	16297200	16297300	1	7079500	7079600	1	25312400	25312500	1	10924500	10924600	6	5352300	5352400	1	42460000	42460100	3	10210300	10210400	2	28716600	28716700	2	12251000	12251100	2	3233700	3233800	2	28721500
1	6601500	6601600	1	4561900	4562000	1	11724000	11724100	1	11720400	11720500	1	12215100	12215200	1	7171800	7171900	2	16386200	16386300	1	7110200	7110300	1	25312500	25312600	1	10924600	10924700	6	5455100	5455200	1	42462100	42462200	3	10366000	10366100	2	28716700	28716800	2	12251100	12251200	2	3233800	3233900	2	28721600
1	6619400	6619500	1	4568700	4568800	1	11724100	11724200	1	11722100	11722200	1	12215200	12215300	1	7171900	7172000	2	16386300	16386400	1	7114500	7114600	1	25312600	25312700	1	10924700	10924800	6	6030200	6030300	1	42468900	42469000	3	10421200	10421300	2	28716800	28716900	2	12251200	12251300	2	3233900	3234000	2	28721700
1	6619500	6619600	1	4568800	4568900	1	11737200	11737300	1	11722200	11722300	1	12215300	12215400	1	7172000	7172100	2	16431600	16431700	1	7187400	7187500	1	25312700	25312800	1	10924800	10924900	6	6030300	6030400	1	42469000	42469100	3	11235400	11235500	2	28716900	28717000	2	12251300	12251400	2	3434800	3434900	2	29669600
1	6681500	6681600	1	4576300	4576400	1	11770400	11770500	1	11723700	11723800	1	12367900	12368000	1	7172100	7172200	2	16439900	16440000	1	7187500	7187600	1	25312800	25312900	1	10924900	10925000	6	6310300	6310400	1	42551500	42551600	3	11235500	11235600	2	28719300	28719400	2	12273000	12273100	2	3435200	3435300	2	29736100
1	6681800	6681900	1	4578500	4578600	1	11798700	11798800	1	11723800	11723900	1	12443400	12443500	1	7172200	7172300	2	16907600	16907700	1	7190400	7190500	1	25313100	25313200	1	10925200	10925300	6	7308800	7308900	1	42551600	42551700	3	11539800	11539900	2	28719400	28719500	2	12273100	12273200	2	3437200	3437300	2	30313300
1	6722000	6722100	1	4579200	4579300	1	11863700	11863800	1	11723900	11724000	1	12485500	12485600	1	7172300	7172400	2	17123600	17123700	1	7191800	7191900	1	25313200	25313300	1	10925300	10925400	6	7957400	7957500	1	42551700	42551800	3	11539900	11540000	2	28719500	28719600	2	12273200	12273300	2	3437700	3437800	2	30643300
1	6723300	6723400	1	4579300	4579400	1	11863800	11863900	1	11724000	11724100	1	12563000	12563100	1	7172400	7172500	2	17123700	17123800	1	7196600	7196700	1	25533600	25533700	1	10925400	10925500	6	8272200	8272300	1	42551900	42552000	3	11540000	11540100	2	28719600	28719700	2	12291000	12291100	2	3563400	3563500	2	31170600
1	6731800	6731900	1	4580800	4580900	1	11882800	11882900	1	11724100	11724200	1	12709900	12710000	1	7172500	7172600	2	17144700	17144800	1	7219500	7219600	1	25600100	25600200	1	10925500	10925600	6	8369600	8369700	1	42553400	42553500	3	11540100	11540200	2	28719700	28719800	2	12291200	12291300	2	3623200	3623300	2	31529300
1	6805600	6805700	1	4585500	4585600	1	11905200	11905300	1	11724700	11724800	1	12754700	12754800	1	7172700	7172800	2	17144800	17144900	1	7237400	7237500	1	25701900	25702000	1	10925600	10925700	6	8369700	8369800	1	42553600	42553700	3	13003000	13003100	2	28719800	28719900	2	12292000	12292100	2	4371900	4372000	2	31529400
1	6807200	6807300	1	4594200	4594300	1	11916000	11916100	1	11736700	11736800	1	12757500	12757600	1	7172800	7172900	2	17229000	17229100	1	7237500	7237600	1	25817600	25817700	1	10925700	10925800	6	8370300	8370400	1	42607900	42608000	3	13415600	13415700	2	28719900	28720000	2	12296500	12296600	2	4512900	4513000	2	31679000
1	6819200	6819300	1	4605800	4605900	1	11935800	11935900	1	11763100	11763200	1	12887200	12887300	1	7172900	7173000	2	17306100	17306200	1	7244900	7245000	1	26303500	26303600	1	10925800	10925900	6	9750700	9750800	1	42678700	42678800	3	13641300	13641400	2	28720000	28720100	2	12298400	12298500	2	4814200	4814300	2	31813000
1	6819600	6819700	1	4605900	4606000	1	11936900	11937000	1	11764500	11764600	1	12909900	12910000	1	7173000	7173100	2	17336800	17336900	1	7246100	7246200	1	26382600	26382700	1	10925900	10926000	6	10054200	10054300	1	42678800	42678900	3	13641400	13641500	2	28720100	28720200	2	12311400	12311500	2	4814300	4814400	2	31813100
1	6833800	6833900	1	4635700	4635800	1	11937000	11937100	1	11797300	11797400	1	13126400	13126500	1	7173100	7173200	2	17365800	17365900	1	7257500	7257600	1	26437900	26438000	1	10926000	10926100	6	10826200	10826300	1	42763700	42763800	3	13641800	13641900	2	28720200	28720300	2	12335200	12335300	2	5215200	5215300	2	33104000
1	6845500	6845600	1	4635800	4635900	1	11997900	11998000	1	11830200	11830300	1	13181000	13181100	1	7173200	7173300	2	17574500	17574600	1	7257600	7257700	1	26562500	26562600	1	10926100	10926200	6	10831600	10831700	1	42794500	42794600	3	13644900	13645000	2	28720300	28720400	2	12335300	12335400	2	5232100	5232200	2	33410000
1	6845600	6845700	1	4637500	4637600	1	11998000	11998100	1	11873000	11873100	1	13191800	13191900	1	7173300	7173400	2	17810800	17810900	1	7257700	7257800	1	26581000	26581100	1	10926200	10926300	6	10831700	10831800	1	42800700	42800800	3	13645000	13645100	2	28720400	28720500	2	12739700	12739800	2	5232200	5232300	2	33622900
1	6851400	6851500	1	4652400	4652500	1	12063900	12064000	1	11873100	11873200	1	13191900	13192000	1	7173400	7173500	2	17811100	17811200	1	7257800	7257900	1	26581400	26581500	1	10926300	10926400	6	12194300	12194400	1	42934400	42934500	3	13645500	13645600	2	28720500	28720600	2	12739800	12739900	2	5232300	5232400	2	33623000
1	6861800	6861900	1	4653700	4653800	1	12064000	12064100	1	11884400	11884500	1	13201300	13201400	1	7187500	7187600	2	17851300	17851400	1	7260600	7260700	1	26581500	26581600	1	10926400	10926500	6	12269300	12269400	1	42941500	42941600	3	14033700	14033800	2	28720600	28720700	2	13258300	13258400	2	5250000	5250100	2	34561700
1	6865300	6865400	1	4655800	4655900	1	12096500	12096600	1	11928700	11928800	1	13435500	13435600	1	7187600	7187700	2	17851400	17851500	1	7261400	7261500	1	26679100	26679200	1	10926500	10926600	6	12342400	12342500	1	43014000	43014100	3	14034000	14034100	2	28720700	28720800	2	14245700	14245800	2	5250100	5250200	2	34561800
1	6881000	6881100	1	4657800	4657900	1	12100700	12100800	1	11933500	11933600	1	13605200	13605300	1	7218700	7218800	2	17921100	17921200	1	7274100	7274200	1	26679200	26679300	1	10926600	10926700	6	12342500	12342600	1	43171700	43171800	3	14034300	14034400	2	28720800	28720900	2	14245900	14246000	2	5508500	5508600	2	34561900
1	6882700	6882800	1	4657900	4658000	1	12101600	12101700	1	11936500	11936600	1	13605300	13605400	1	7218800	7218900	2	18032400	18032500	1	7286900	7287000	1	26695700	26695800	1	10926700	10926800	6	12921000	12921100	1	43215900	43216000	3	14034400	14034500	2	28720900	28721000	2	14246100	14246200	2	5508600	5508700	2	34745300
1	6949200	6949300	1	4662900	4663000	1	12101700	12101800	1	11936600	11936700	1	13637800	13637900	1	7218900	7219000	2	18032500	18032600	1	7287000	7287100	1	26704000	26704100	1	10926800	10926900	6	13326800	13326900	1	43239900	43240000	3	14034600	14034700	2	28721000	28721100	2	14246200	14246300	2	5508900	5509000	2	34745400
1	6949700	6949800	1	4667700	4667800	1	12143300	12143400	1	11937500	11937600	1	13645000	13645100	1	7219100	7219200	2	18038800	18038900	1	7300500	7300600	1	26743200	26743300	1	10926900	10927000	6	13737900	13738000	2	56500	56600	3	14034700	14034800	2	28721100	28721200	2	14246300	14246400	2	5509000	5509100	2	34745500
1	6955600	6955700	1	4667800	4667900	1	12143400	12143500	1	11993700	11993800	1	13690200	13690300	1	7219200	7219300	2	18065100	18065200	1	7307400	7307500	1	26925000	26925100	1	10927000	10927100	6	13937900	13938000	2	208900	209000	3	14476700	14476800	2	28721300	28721400	2	14246700	14246800	2	5509200	5509300	2	34760000
1	6977000	6977100	1	4672300	4672400	1	12148700	12148800	1	11996400	11996500	1	13690300	13690400	1	7219300	7219400	2	18342900	18343000	1	7307500	7307600	1	26925800	26925900	1	10927100	10927200	6	13938000	13938100	2	214400	214500	3	14738500	14738600	2	28721400	28721500	2	14246800	14246900	2	5887500	5887600	2	34760100
1	6978700	6978800	1	4687500	4687600	1	12190500	12190600	1	11996500	11996600	1	13699900	13700000	1	7274100	7274200	2	18534800	18534900	1	7315000	7315100	1	26925900	26926000	1	10927200	10927300	6	13943300	13943400	2	214500	214600	3	14738600	14738700	2	28721500	28721600	2	14247000	14247100	2	5888000	5888100	2	35413300
1	6994200	6994300	1	4693800	4693900	1	12190600	12190700	1	11996600	11996700	1	13700000	13700100	1	7282100	7282200	2	18534900	18535000	1	7316500	7316600	1	26927300	26927400	1	10927300	10927400	6	13943400	13943500	2	427100	427200	3	14942400	14942500	2	28721600	28721700	2	14247200	14247300	2	5888100	5888200	3	1118900
1	6996600	6996700	1	4701900	4702000	1	12196700	12196800	1	11996700	11996800	1	13732800	13732900	1	7305800	7305900	2	18535000	18535100	1	7396300	7396400	1	26928100	26928200	1	10927400	10927500	6	14597400	14597500	2	427200	427300	3	15007400	15007500	2	28721700	28721800	2	14257400	14257500	2	5937300	5937400	3	1444200
1	6999400	6999500	1	4704400	4704500	1	12196800	12196900	1	11996800	11996900	1	13733000	13733100	1	7305900	7306000	2	18535100	18535200	1	7396400	7396500	1	26928600	26928700	1	11041400	11041500	6	15310700	15310800	2	615300	615400	3	15144300	15144400	2	28721800	28721900	2	14257500	14257600	2	5937400	5937500	3	1444300
1	7005300	7005400	1	4709500	4709600	1	12197000	12197100	1	11997200	11997300	1	13733200	13733300	1	7306000	7306100	2	18637400	18637500	1	7396600	7396700	1	26928800	26928900	1	11082800	11082900	6	18136400	18136500	2	615400	615500	3	15201500	15201600	2	28721900	28722000	2	14280800	14280900	2	5937500	5937600	3	1657400
1	7070700	7070800	1	4709600	4709700	1	12197300	12197400	1	11997300	11997400	1	13733400	13733500	1	7396600	7396700	2	18788600	18788700	1	7396700	7396800	1	26930000	26930100	1	11082900	11083000	6	18201400	18201500	2	617900	618000	3	16183100	16183200	2	29074100	29074200	2	14288600	14288700	2	6001400	6001500	3	1691700
1	7078800	7078900	1	4757500	4757600	1	12197400	12197500	1	11997900	11998000	1	13758600	13758700	1	7537200	7537300	2	18915300	18915400	1	7503300	7503400	1	26974200	26974300	1	11088100	11088200	6	19107800	19107900	2	618000	618100	3	16309500	16309600	2	29074200	29074300	2	14745100	14745200	2	6001500	6001600	3	1714800
1	7095800	7095900	1	4776200	4776300	1	12316400	12316500	1	11998000	11998100	1	13758700	13758800	1	7537300	7537400	2	18928000	18928100	1	7537300	7537400	1	27029900	27030000	1	11132600	11132700	6	19405700	19405800	2	677800	677900	3	16309600	16309700	2	29154700	29154800	2	14745200	14745300	2	6001600	6001700	3	1715800
1	7114700	7114800	1	4776400	4776500	1	12318900	12319000	1	11998100	11998200	1	13759100	13759200	1	7541900	7542000	2	19292300	19292400	1	7555400	7555500	1	27077700	27077800	1	11134800	11134900	6	19844300	19844400	2	726400	726500	3	16788400	16788500	2	29164200	29164300	2	14769300	14769400	2	6001700	6001800	3	1892300
1	7114800	7114900	1	4776500	4776600	1	12359800	12359900	1	11998600	11998700	1	13793100	13793200	1	7542000	7542100	2	19292400	19292500	1	7563400	7563500	1	27529100	27529200	1	11135900	11136000	6	19849700	19849800	2	800900	801000	3	17204600	17204700	2	29669500	29669600	2	14814500	14814600	2	6004000	6004100	3	2113500
1	7138200	7138300	1	4781600	4781700	1	12457800	12457900	1	12063900	12064000	1	13862600	13862700	1	7542400	7542500	2	19484600	19484700	1	7567400	7567500	1	27529200	27529300	1	11138900	11139000	6	21005600	21005700	2	815700	815800	3	17236100	17236200	2	29669600	29669700	2	15328500	15328600	2	6004100	6004200	3	2139300
1	7138400	7138500	1	4781700	4781800	1	12466700	12466800	1	12064000	12064100	1	13875200	13875300	1	7542500	7542600	2	19501100	19501200	1	7614700	7614800	1	27532600	27532700	1	11189100	11189200	6	21180400	21180500	2	830800	830900	3	17283900	17284000	2	30290900	30291000	2	15328600	15328700	2	6004200	6004300	3	2139400
1	7144400	7144500	1	4781800	4781900	1	12531000	12531100	1	12100700	12100800	1	13883800	13883900	1	7542600	7542700	2	19548400	19548500	1	7619600	7619700	1	27662200	27662300	1	11189200	11189300	6	21184600	21184700	2	1117800	1117900	3	17993500	17993600	2	30291000	30291100	2	15328900	15329000	2	6004300	6004400	3	2144700
1	7187700	7187800	1	4789300	4789400	1	12531100	12531200	1	12100800	12100900	1	13932500	13932600	1	7542800	7542900	2	19673000	19673100	1	7628300	7628400	1	27894800	27894900	1	11189300	11189400	6	21251100	21251200	2	1300500	1300600	3	18344700	18344800	2	30313300	30313400	2	15333500	15333600	2	6004400	6004500	3	2144800
1	7187800	7187900	1	4789400	4789500	1	12599600	12599700	1	12101200	12101300	1	13932600	13932700	1	7544500	7544600	2	19964300	19964400	1	7662000	7662100	1	27894900	27895000	1	11189400	11189500	6	21326700	21326800	2	1301800	1301900	3	18601500	18601600	2	31316200	31316300	2	15466100	15466200	2	6010800	6010900	3	2456100
1	7199800	7199900	1	4793300	4793400	1	12600500	12600600	1	12101600	12101700	1	13932700	13932800	1	7544800	7544900	2	20063600	20063700	1	7700900	7701000	1	27907300	27907400	1	11189500	11189600	6	21326800	21326900	2	1371200	1371300	3	18601600	18601700	2	31449100	31449200	2	15466200	15466300	2	6010900	6011000	3	2456200
1	7218800	7218900	1	4799800	4799900	1	12605100	12605200	1	12101700	12101800	1	13932800	13932900	1	7544900	7545000	2	20114600	20114700	1	7715400	7715500	1	28010700	28010800	1	11190000	11190100	6	21646600	21646700	2	1428200	1428300	3	19955100	19955200	2	31449200	31449300	2	15474900	15475000	2	6011000	6011100	3	2607600
1	7219500	7219600	1	4799900	4800000	1	12605300	12605400	1	12102200	12102300	1	13989600	13989700	1	7545000	7545100	2	20168000	20168100	1	7715600	7715700	1	28010900	28011000	1	11190100	11190200	6	21759600	21759700	2	1428300	1428400	3	19978400	19978500	2	31529300	31529400	2	15486300	15486400	2	6011100	6011200	3	4095200
1	7234000	7234100	1	4803900	4804000	1	12606300	12606400	1	12112300	12112400	1	14026100	14026200	1	7545300	7545400	2	20168200	20168300	1	7727700	7727800	1	28200600	28200700	1	11190200	11190300	6	21759700	21759800	2	1442100	1442200	3	19987800	19987900	2	31529400	31529500	2	15510200	15510300	2	6011400	6011500	3	4101900
1	7243500	7243600	1	4804600	4804700	1	12608900	12609000	1	12113800	12113900	1	14066800	14066900	1	7545400	7545500	2	20299500	20299600	1	7729200	7729300	1	28200700	28200800	1	11190300	11190400	6	21760600	21760700	2	1451400	1451500	3	19987900	19988000	2	31813000	31813100	2	15510300	15510400	2	6011700	6011800	3	4102200
1	7246100	7246200	1	4805400	4805500	1	12682000	12682100	1	12142700	12142800	1	14288000	14288100	1	7545500	7545600	2	20309400	20309500	1	7766700	7766800	1	28200800	28200900	1	11190400	11190500	6	21760700	21760800	2	1480900	1481000	3	20167700	20167800	2	31853000	31853100	2	15692900	15693000	2	6029400	6029500	3	4117600
1	7257600	7257700	1	4805500	4805600	1	12682100	12682200	1	12143000	12143100	1	14364400	14364500	1	7545600	7545700	2	20309500	20309600	1	7768100	7768200	1	28200900	28201000	1	11190600	11190700	6	21760800	21760900	2	1496500	1496600	3	20388700	20388800	2	32252500	32252600	2	15776800	15776900	2	6029500	6029600	3	4213300
1	7257700	7257800	1	4807800	4807900	1	12696700	12696800	1	12143100	12143200	1	14373800	14373900	1	7545700	7545800	2	20480000	20480100	1	7768200	7768300	1	28201000	28201100	1	11190700	11190800	6	21760900	21761000	2	1496600	1496700	3	20388800	20388900	2	32537300	32537400	2	15792600	15792700	2	6033900	6034000	3	4370400
1	7261700	7261800	1	4813300	4813400	1	12696800	12696900	1	12143200	12143300	1	14374100	14374200	1	7545800	7545900	2	20480400	20480500	1	7778700	7778800	1	28201100	28201200	1	11190800	11190900	6	23336200	23336300	2	1496700	1496800	3	20443900	20444000	2	32537500	32537600	2	15795800	15795900	2	6034000	6034100	3	4701700
1	7274100	7274200	1	4815700	4815800	1	12714500	12714600	1	12143400	12143500	1	14374200	14374300	1	7545900	7546000	2	20559700	20559800	1	7802800	7802900	1	28201200	28201300	1	11191300	11191400	6	23521600	23521700	2	1589200	1589300	3	20483100	20483200	2	32694300	32694400	2	15795900	15796000	2	6034100	6034200	3	4766400
1	7286900	7287000	1	4816400	4816500	1	12761000	12761100	1	12146100	12146200	1	14374300	14374400	1	7546000	7546100	2	20561400	20561500	1	7839200	7839300	1	28201300	28201400	1	11195500	11195600	6	23521700	23521800	2	1589500	1589600	3	22080400	22080500	2	32694400	32694500	2	15808300	15808400	2	6034200	6034300	3	4767400
1	7305800	7305900	1	4824300	4824400	1	12762000	12762100	1	12167700	12167800	1	14374700	14374800	1	7546100	7546200	2	20561500	20561600	1	7867900	7868000	1	28201400	28201500	1	11195600	11195700	6	23880200	23880300	2	1638700	1638800	3	22080500	22080600	2	33622900	33623000	2	15808400	15808500	2	6034300	6034400	3	5159400
1	7305900	7306000	1	4832100	4832200	1	12780300	12780400	1	12196700	12196800	1	14376900	14377000	1	7546200	7546300	2	20587100	20587200	1	7868000	7868100	1	28201500	28201600	1	11195700	11195800	6	23908100	23908200	2	1638800	1638900	3	22169800	22169900	2	33623000	33623100	2	15808500	15808600	2	6034800	6034900	3	5159500
1	7306000	7306100	1	4927800	4927900	1	12781600	12781700	1	12196800	12196900	1	14406100	14406200	1	7546300	7546400	2	20587200	20587300	1	7868100	7868200	1	28201600	28201700	1	11195800	11195900	6	24984800	24984900	2	1672500	1672600	3	22631600	22631700	2	33684700	33684800	2	16236400	16236500	2	6107600	6107700	3	5159800
1	7307500	7307600	1	4928700	4928800	1	12781900	12782000	1	12197000	12197100	1	14437500	14437600	1	7546400	7546500	2	20692700	20692800	1	7868200	7868300	1	28201900	28202000	1	11195900	11196000	6	25217400	25217500	2	1678000	1678100	3	22822000	22822100	2	34561700	34561800	2	16541600	16541700	2	6107700	6107800	3	5160000
1	7314700	7314800	1	4928800	4928900	1	12782400	12782500	1	12197300	12197400	1	14443300	14443400	1	7546500	7546600	2	20715900	20716000	1	7872900	7873000	1	28202000	28202100	1	11196000	11196100	6	25874400	25874500	2	1694800	1694900	3	22927400	22927500	2	34561800	34561900	2	16559300	16559400	2	6107800	6107900	3	5521300
1	7316400	7316500	1	4929200	4929300	1	12786400	12786500	1	12197400	12197500	1	14596300	14596400	1	7621200	7621300	2	20875900	20876000	1	7873500	7873600	1	28202100	28202200	1	11196100	11196200	6	26640200	26640300	2	1978200	1978300	3	23658400	23658500	2	34561900	34562000	2	16566200	16566300	2	6108000	6108100	3	5828200
1	7316500	7316600	1	4929300	4929400	1	12787000	12787100	1	12197500	12197600	1	14877000	14877100	1	7633200	7633300	2	20876800	20876900	1	7874400	7874500	1	28202400	28202500	1	11196200	11196300	6	27328100	27328200	2	2066600	2066700	3	23658500	23658600	2	34745300	34745400	2	16566300	16566400	2	6108100	6108200	3	6510800
1	7393900	7394000	1	4932000	4932100	1	12787200	12787300	1	12197700	12197800	1	14877400	14877500	1	7637800	7637900	2	20893400	20893500	1	7881900	7882000	1	28202500	28202600	1	11196300	11196400	6	27340700	27340800	2	2181700	2181800	3	23658600	23658700	2	34745400	34745500	2	16566400	16566500	2	6155800	6155900	3	6510900
1	7396400	7396500	1	4941400	4941500	1	12787300	12787400	1	12198200	12198300	1	14894300	14894400	1	7638000	7638100	2	20893500	20893600	1	7882000	7882100	1	28202600	28202700	1	11196400	11196500	6	27456300	27456400	2	2181800	2181900	3	23658700	23658800	2	34745500	34745600	2	16567100	16567200	2	6299700	6299800	3	6541600
1	7396600	7396700	1	4942800	4942900	1	12802600	12802700	1	12198600	12198700	1	14960700	14960800	1	7638300	7638400	2	20951000	20951100	1	7884500	7884600	1	28202700	28202800	1	11196500	11196600	6	27702400	27702500	2	2186600	2186700	3	23658800	23658900	2	34760000	34760100	2	16568800	16568900	2	6300100	6300200	3	6541700
1	7401100	7401200	1	4942900	4943000	1	12802700	12802800	1	12198800	12198900	1	14960800	14960900	1	7761700	7761800	2	20951700	20951800	1	7896600	7896700	1	28202800	28202900	1	11196600	11196700	6	27955300	27955400	2	2561600	2561700	3	23658900	23659000	2	34760100	34760200	2	16573400	16573500	2	6300600	6300700	3	6684000
1	7402800	7402900	1	4947800	4947900	1	12887200	12887300	1	12198900	12199000	1	14960900	14961000	1	7781100	7781200	2	21019600	21019700	1	7896700	7896800	1	28202900	28203000	1	11196700	11196800	6	28029200	28029300	2	2571900	2572000	3	23659000	23659100	2	35256700	35256800	2	16578400	16578500	2	6302600	6302700	3	6885200
1	7428500	7428600	1	4947900	4948000	1	12891800	12891900	1	12276900	12277000	1	14961000	14961100	1	7781200	7781300	2	21166200	21166300	1	7909600	7909700	1	28203000	28203100	1	11196800	11196900	6	28029400	28029500	2	2598800	2598900	3	23659100	23659200	2	35256800	35256900	2	16578600	16578700	2	6386400	6386500	3	6885300
1	7428600	7428700	1	4948000	4948100	1	13004600	13004700	1	12277000	12277100	1	14961100	14961200	1	7791100	7791200	2	21386500	21386600	1	7916600	7916700	1	28203100	28203200	1	11196900	11197000	6	28128500	28128600	2	2598900	2599000	3	23659200	23659300	2	35271300	35271400	2	16596600	16596700	2	6696200	6696300	3	7103700
1	7449100	7449200	1	4975700	4975800	1	13051800	13051900	1	12277100	12277200	1	15111300	15111400	1	7791200	7791300	2	21502400	21502500	1	7926100	7926200	1	28203600	28203700	1	11197200	11197300	6	28128600	28128700	2	2884100	2884200	3	23659300	23659400	2	35273000	35273100	2	16596900	16597000	2	6696300	6696400	3	7646200
1	7450300	7450400	1	4988300	4988400	1	13065400	13065500	1	12483400	12483500	1	15172900	15173000	1	7873500	7873600	2	21517900	21518000	1	7977100	7977200	1	28203700	28203800	1	11197300	11197400	6	28544300	28544400	2	2885300	2885400	3	23659500	23659600	2	35613200	35613300	2	16917300	16917400	2	6828100	6828200	3	7870700
1	7450400	7450500	1	4988400	4988500	1	13085900	13086000	1	12513800	12513900	1	15248000	15248100	1	7990700	7990800	2	21595300	21595400	1	7990300	7990400	1	28203900	28204000	1	11197400	11197500	6	28958700	28958800	2	2885400	2885500	3	23659600	23659700	3	269200	269300	2	16917400	16917500	2	6828200	6828300	3	7956200
1	7450500	7450600	1	4988500	4988600	1	13123800	13123900	1	12528200	12528300	1	15364800	15364900	1	7990800	7990900	2	21614800	21614900	1	7990800	7990900	1	28204000	28204100	1	11197500	11197600	6	29181900	29182000	2	2898100	2898200	3	23659700	23659800	3	269300	269400	2	16953300	16953400	2	6828300	6828400	3	8410100
1	7471500	7471600	1	4995700	4995800	1	13127300	13127400	1	12531000	12531100	1	15365300	15365400	1	7990900	7991000	2	21648400	21648500	1	7990900	7991000	1	28204100	28204200	1	11197600	11197700	6	29856600	29856700	2	2926800	2926900	3	23659800	23659900	3	269400	269500	2	17181800	17181900	2	6828400	6828500	3	9162200
1	7494700	7494800	1	4998600	4998700	1	13128600	13128700	1	12543200	12543300	1	15365400	15365500	1	7992200	7992300	2	21719300	21719400	1	7992400	7992500	1	28204200	28204300	1	11197700	11197800	6	29856700	29856800	2	2964300	2964400	3	23659900	23660000	3	269500	269600	2	17182100	17182200	2	6828600	6828700	3	9162300
1	7515900	7516000	1	5011000	5011100	1	13179200	13179300	1	12577500	12577600	1	15367600	15367700	1	7992400	7992500	2	21740200	21740300	1	8007900	8008000	1	28204300	28204400	1	11197800	11197900	6	29856800	29856900	2	3113300	3113400	3	23660400	23660500	3	269600	269700	2	17626300	17626400	2	6840200	6840300	3	10134100
1	7555400	7555500	1	5012900	5013000	1	13181500	13181600	1	12577900	12578000	1	15369600	15369700	1	8015700	8015800	2	21870400	21870500	1	8025700	8025800	1	28204400	28204500	1	11197900	11198000	6	29869300	29869400	2	3319100	3319200	3	23660500	23660600	3	270500	270600	2	17693200	17693300	2	6840300	6840400	3	10134200
1	7566600	7566700	1	5051200	5051300	1	13196200	13196300	1	12599600	12599700	1	15370000	15370100	1	8046200	8046300	2	22004000	22004100	1	8025800	8025900	1	28204500	28204600	1	11198000	11198100	6	29869400	29869500	2	3407800	3407900	3	23660600	23660700	3	270600	270700	2	18065300	18065400	2	6840400	6840500	3	10210300
1	7568800	7568900	1	5051300	5051400	1	13196300	13196400	1	12603600	12603700	1	15370400	15370500	1	8070200	8070300	2	22021100	22021200	1	8046200	8046300	1	28204800	28204900	1	11198100	11198200	6	29869500	29869600	2	3535300	3535400	3	23660800	23660900	3	270700	270800	2	18789000	18789100	2	6851300	6851400	3	10391300
1	7589200	7589300	1	5051500	5051600	1	13201600	13201700	1	12605100	12605200	1	15370500	15370600	1	8138700	8138800	2	22042700	22042800	1	8080500	8080600	1	28205000	28205100	1	11198200	11198300	6	29889500	29889600	2	3543400	3543500	3	23661100	23661200	3	270900	271000	2	18956200	18956300	2	6851400	6851500	3	10391400
1	7590300	7590400	1	5058800	5058900	1	13220300	13220400	1	12606400	12606500	1	15370600	15370700	1	8201500	8201600	2	22050900	22051000	1	8080700	8080800	1	28205100	28205200	1	11198300	11198400	6	30099500	30099600	2	3556400	3556500	3	23661200	23661300	3	271100	271200	2	19344900	19345000	2	6854700	6854800	3	10466900
1	7607300	7607400	1	5068200	5068300	1	13220400	13220500	1	12607800	12607900	1	15371100	15371200	1	8237400	8237500	2	22205200	22205300	1	8108800	8108900	1	28205200	28205300	1	11198400	11198500	6	30099600	30099700	2	3558200	3558300	3	24377000	24377100	3	287800	287900	2	19345000	19345100	2	6858700	6858800	3	10467000
1	7613100	7613200	1	5074300	5074400	1	13220700	13220800	1	12609100	12609200	1	15492500	15492600	1	8240000	8240100	2	22205300	22205400	1	8130000	8130100	1	28205300	28205400	1	11198600	11198700	6	30327100	30327200	2	3579400	3579500	3	24957300	24957400	3	525300	525400	2	19415500	19415600	2	6858800	6858900	3	11086200
1	7613900	7614000	1	5086600	5086700	1	13226800	13226900	1	12681600	12681700	1	15543500	15543600	1	8240700	8240800	2	22327000	22327100	1	8138600	8138700	1	28205400	28205500	1	11198800	11198900	6	30842600	30842700	2	3579500	3579600	3	24957400	24957500	3	1444300	1444400	2	19416100	19416200	2	6858900	6859000	3	11086400
1	7614100	7614200	1	5087600	5087700	1	13226900	13227000	1	12714400	12714500	1	15588900	15589000	1	8241000	8241100	2	22549100	22549200	1	8138700	8138800	1	28205500	28205600	1	11198900	11199000	7	366600	366700	2	3702100	3702200	3	25247400	25247500	3	1691700	1691800	2	19416200	19416300	2	6859000	6859100	3	11235400
1	7621200	7621300	1	5090200	5090300	1	13227200	13227300	1	12782500	12782600	1	15604200	15604300	1	8325100	8325200	2	22549200	22549300	1	8139200	8139300	1	28205600	28205700	1	11199000	11199100	7	487800	487900	2	3710400	3710500	3	25294900	25295000	3	1715800	1715900	2	19548900	19549000	2	6859100	6859200	3	11235500
1	7700900	7701000	1	5090300	5090400	1	13227400	13227500	1	12785500	12785600	1	15698400	15698500	1	8457200	8457300	2	22549300	22549400	1	8159300	8159400	1	28205700	28205800	1	11199100	11199200	7	487900	488000	2	3929200	3929300	3	25801200	25801300	3	1715900	1716000	2	20020500	20020600	2	6862400	6862500	3	11265600
1	7715400	7715500	1	5104600	5104700	1	13228900	13229000	1	12787000	12787100	1	15698500	15698600	1	8460900	8461000	2	22646000	22646100	1	8161600	8161700	1	28205800	28205900	1	11199200	11199300	7	502600	502700	2	3962300	3962400	3	26007700	26007800	3	1889500	1889600	2	20052200	20052300	2	6866900	6867000	3	11432900
1	7726200	7726300	1	5109700	5109800	1	13234900	13235000	1	12787200	12787300	1	15708000	15708100	1	8553200	8553300	2	22646100	22646200	1	8189300	8189400	1	28206100	28206200	1	11199400	11199500	7	589500	589600	2	3967900	3968000	3	26008000	26008100	3	1889600	1889700	2	20115100	20115200	2	6867100	6867200	3	11549600
1	7727700	7727800	1	5109800	5109900	1	13272000	13272100	1	12787300	12787400	1	15712300	15712400	1	8599900	8600000	2	22674900	22675000	1	8210500	8210600	1	28206300	28206400	1	11199700	11199800	7	589600	589700	2	3971100	3971200	3	26008500	26008600	3	1892300	1892400	2	20200400	20200500	2	6867200	6867300	3	11549700
1	7732200	7732300	1	5126800	5126900	1	13389800	13389900	1	12788300	12788400	1	15712500	15712600	1	8600000	8600100	2	23076100	23076200	1	8210600	8210700	1	28206700	28206800	1	11199800	11199900	7	619900	620000	2	3971200	3971300	3	26009100	26009200	3	1892400	1892500	2	20200500	20200600	2	6867300	6867400	3	11688400
1	7732300	7732400	1	5126900	5127000	1	13389900	13390000	1	12791600	12791700	1	15712900	15713000	1	8600200	8600300	2	23076200	23076300	1	8227400	8227500	1	28208500	28208600	1	11223900	11224000	7	1491600	1491700	2	3975200	3975300	3	26013700	26013800	3	2139300	2139400	2	20200700	20200800	2	6867400	6867500	3	12039800
1	7748400	7748500	1	5127200	5127300	1	13390000	13390100	1	12802700	12802800	1	15713100	15713200	1	8600300	8600400	2	23503400	23503500	1	8229900	8230000	1	28210200	28210300	1	11252300	11252400	7	1697000	1697100	2	3976600	3976700	3	26013800	26013900	3	2139400	2139500	2	20200800	20200900	2	7167700	7167800	3	12039900
1	7760900	7761000	1	5127400	5127500	1	13390100	13390200	1	12851600	12851700	1	15713200	15713300	1	8600400	8600500	2	23513700	23513800	1	8231300	8231400	1	28210500	28210600	1	11280700	11280800	7	2346000	2346100	2	4314100	4314200	3	26412400	26412500	3	2607600	2607700	2	20200900	20201000	2	7195700	7195800	3	12126300
1	7761000	7761100	1	5127500	5127600	1	13390200	13390300	1	12858600	12858700	1	15765600	15765700	1	8600500	8600600	2	23520400	23520500	1	8231400	8231500	1	28210700	28210800	1	11349200	11349300	7	3895200	3895300	2	4314200	4314300	3	26456700	26456800	3	3124600	3124700	2	20201000	20201100	2	7445600	7445700	3	12319700
1	7766700	7766800	1	5134500	5134600	1	13390300	13390400	1	12861500	12861600	1	15855200	15855300	1	8600600	8600700	2	23811600	23811700	1	8235800	8235900	1	28210800	28210900	1	11349600	11349700	7	4515000	4515100	2	4320000	4320100	3	26460100	26460200	3	3525800	3525900	2	20246800	20246900	2	7445700	7445800	3	12319800
1	7768100	7768200	1	5142200	5142300	1	13390400	13390500	1	12867000	12867100	1	15869500	15869600	1	8600800	8600900	2	23947800	23947900	1	8235900	8236000	1	28211100	28211200	1	11361000	11361100	7	4561000	4561100	2	4360300	4360400	3	26959600	26959700	3	4143800	4143900	2	20250100	20250200	2	7622400	7622500	3	12393000
1	7768200	7768300	1	5152400	5152500	1	13390500	13390600	1	12877300	12877400	1	15888900	15889000	1	8600900	8601000	2	24076000	24076100	1	8242300	8242400	1	28211400	28211500	1	11361100	11361200	7	5329000	5329100	2	4368000	4368100	3	27611000	27611100	3	4701600	4701700	2	20251600	20251700	2	7638900	7639000	3	12397400
1	7778700	7778800	1	5157900	5158000	1	13390600	13390700	1	12891800	12891900	1	15889000	15889100	1	8601000	8601100	2	24258800	24258900	1	8244300	8244400	1	28211500	28211600	1	11361200	11361300	7	5904500	5904600	2	4369400	4369500	3	27611100	27611200	3	4766400	4766500	2	20252700	20252800	2	7639200	7639300	3	12397500
1	7787800	7787900	1	5158000	5158100	1	13390700	13390800	1	13110600	13110700	1	15889100	15889200	1	8601300	8601400	2	24371300	24371400	1	8273900	8274000	1	28211600	28211700	1	11361300	11361400	7	6964600	6964700	2	4588600	4588700	3	27611200	27611300	3	5012000	5012100	2	20252800	20252900	2	7639500	7639600	3	12437300
1	7791000	7791100	1	5159500	5159600	1	13390800	13390900	1	13127100	13127200	1	15889400	15889500	1	8602400	8602500	2	24382000	24382100	1	8307600	8307700	1	28211700	28211800	1	11361400	11361500	7	8385900	8386000	2	4588900	4589000	3	27611300	27611400	3	5490700	5490800	2	20252900	20253000	2	7639600	7639700	3	12565100
1	7819900	7820000	1	5159600	5159700	1	13390900	13391000	1	13179200	13179300	1	15889600	15889700	1	8603800	8603900	2	24386800	24386900	1	8312000	8312100	1	28212200	28212300	1	11361500	11361600	7	8423500	8423600	2	4615700	4615800	3	27611400	27611500	3	5828200	5828300	2	20253000	20253100	2	7639700	7639800	3	12676000
1	7846900	7847000	1	5159700	5159800	1	13391000	13391100	1	13191000	13191100	1	15889800	15889900	1	8603900	8604000	2	24386900	24387000	1	8318500	8318600	1	28212300	28212400	1	11361600	11361700	7	8540900	8541000	2	4656900	4657000	3	27611500	27611600	3	6404200	6404300	2	20253800	20253900	2	7639800	7639900	3	12717200
1	7868000	7868100	1	5168500	5168600	1	13391100	13391200	1	13201200	13201300	1	15898500	15898600	1	8604000	8604100	2	24868200	24868300	1	8340200	8340300	1	28212400	28212500	1	11361700	11361800	7	9426900	9427000	2	4657000	4657100	3	27611600	27611700	3	6684000	6684100	2	20259400	20259500	2	7870700	7870800	3	12717300
1	7868100	7868200	1	5198400	5198500	1	13391200	13391300	1	13201300	13201400	1	15898600	15898700	1	8604100	8604200	2	24996400	24996500	1	8341300	8341400	1	28212500	28212600	1	11361800	11361900	7	10030200	10030300	2	4657800	4657900	3	27611700	27611800	3	7102900	7103000	2	20259500	20259600	2	7871000	7871100	3	13641300
1	7917900	7918000	1	5217100	5217200	1	13391300	13391400	1	13209900	13210000	1	15913900	15914000	1	8604400	8604500	2	24996500	24996600	1	8341700	8341800	1	28212700	28212800	1	11361900	11362000	7	12909500	12909600	2	4706700	4706800	3	27611800	27611900	3	7103100	7103200	2	20259700	20259800	2	7871200	7871300	3	13641400
1	7922000	7922100	1	5232900	5233000	1	13391400	13391500	1	13220700	13220800	1	15933100	15933200	1	8604500	8604600	2	25042700	25042800	1	8381700	8381800	1	28212800	28212900	1	11362000	11362100	7	13057600	13057700	2	4706800	4706900	3	27611900	27612000	3	7103200	7103300	2	20259800	20259900	2	7871300	7871400	3	13645500
1	7922100	7922200	1	5234100	5234200	1	13391500	13391600	1	13223500	13223600	1	15933200	15933300	1	8604700	8604800	2	25042800	25042900	1	8412200	8412300	1	28212900	28213000	1	11362100	11362200	7	13310500	13310600	2	4772300	4772400	3	27612900	27613000	3	7103400	7103500	2	20262200	20262300	2	7915500	7915600	3	14034400
1	7922200	7922300	1	5234200	5234300	1	13391600	13391700	1	13223800	13223900	1	15941900	15942000	1	8604800	8604900	2	25317000	25317100	1	8419700	8419800	1	28213000	28213100	1	11362200	11362300	7	13691400	13691500	2	4830700	4830800	3	27661700	27661800	3	7492100	7492200	2	20262300	20262400	2	8391100	8391200	3	14137600
1	7926600	7926700	1	5243100	5243200	1	13391700	13391800	1	13224400	13224500	1	15942000	15942100	1	8605000	8605100	2	25343200	25343300	1	8432900	8433000	1	28213100	28213200	1	11362300	11362400	7	13691500	13691600	2	4890800	4890900	3	28877100	28877200	3	7956000	7956100	2	20263300	20263400	2	8391200	8391300	3	14864600
1	7927900	7928000	1	5243200	5243300	1	13391800	13391900	1	13224700	13224800	1	15942200	15942300	1	8605100	8605200	2	25360400	25360500	1	8433000	8433100	1	28213200	28213300	1	11362400	11362500	7	13850800	13850900	2	5019500	5019600	3	28877200	28877300	3	7956200	7956300	2	20267000	20267100	2	8391300	8391400	3	14942400
1	7952300	7952400	1	5251500	5251600	1	13391900	13392000	1	13224800	13224900	1	15942300	15942400	1	8605200	8605300	2	25360500	25360600	1	8433100	8433200	1	28213300	28213400	1	11362500	11362600	7	14493900	14494000	2	5108500	5108600	3	28877300	28877400	3	7956300	7956400	2	20267100	20267200	2	8391400	8391500	3	15007400
1	7952600	7952700	1	5253600	5253700	1	13392000	13392100	1	13226900	13227000	1	15942800	15942900	1	8605400	8605500	2	25502000	25502100	1	8443500	8443600	1	28213400	28213500	1	11362600	11362700	7	14494000	14494100	2	5400700	5400800	3	28878600	28878700	3	7956600	7956700	2	20267200	20267300	2	8460700	8460800	3	15201500
1	7976100	7976200	1	5254600	5254700	1	13392100	13392200	1	13227200	13227300	1	15942900	15943000	1	8605600	8605700	2	25502100	25502200	1	8456600	8456700	1	28213600	28213700	1	11362700	11362800	7	15375100	15375200	2	5442400	5442500	3	29382400	29382500	3	9057300	9057400	2	20270800	20270900	2	8461100	8461200	3	15201600
1	7976200	7976300	1	5254700	5254800	1	13392200	13392300	1	13227300	13227400	1	15943100	15943200	1	8610500	8610600	2	25549700	25549800	1	8457400	8457500	1	28213700	28213800	1	11362800	11362900	7	15511600	15511700	2	5496700	5496800	3	29382500	29382600	3	9589500	9589600	2	20270900	20271000	2	8461200	8461300	3	15587900
1	7977100	7977200	1	5272700	5272800	1	13392300	13392400	1	13227400	13227500	1	16021000	16021100	1	8610600	8610700	2	25764500	25764600	1	8457500	8457600	1	28213800	28213900	1	11362900	11363000	7	15998300	15998400	2	5521700	5521800	3	29382600	29382700	3	9603700	9603800	2	20271000	20271100	2	8464000	8464100	3	15727600
1	7977200	7977300	1	5274100	5274200	1	13410400	13410500	1	13228900	13229000	1	16021100	16021200	1	8610700	8610800	2	25854100	25854200	1	8457800	8457900	1	28213900	28214000	1	11363000	11363100	7	16394900	16395000	2	5638100	5638200	3	29441000	29441100	3	10134100	10134200	2	20271200	20271300	2	8464400	8464500	3	16120300
1	7977500	7977600	1	5277800	5277900	1	13410700	13410800	1	13234400	13234500	1	16110900	16111000	1	8610800	8610900	2	25967300	25967400	1	8461100	8461200	1	28214000	28214100	1	11363100	11363200	7	16395000	16395100	2	5732300	5732400	3	30494100	30494200	3	10134200	10134300	2	20272900	20273000	2	8464500	8464600	3	16179400
1	7990800	7990900	1	5295800	5295900	1	13435500	13435600	1	13234900	13235000	1	16111000	16111100	1	8612100	8612200	2	25967400	25967500	1	8462600	8462700	1	28214100	28214200	1	11363200	11363300	7	17137600	17137700	2	5809500	5809600	3	31179700	31179800	3	10134300	10134400	2	20273000	20273100	2	8519900	8520000	3	16179500
1	7990900	7991000	1	5303000	5303100	1	13473800	13473900	1	13271900	13272000	1	16123800	16123900	1	8668100	8668200	2	26153200	26153300	1	8474900	8475000	1	28214200	28214300	1	11363300	11363400	7	17143100	17143200	2	5810000	5810100	3	31179800	31179900	3	10134400	10134500	2	20275000	20275100	2	8524100	8524200	3	16789200
1	7992100	7992200	1	5303200	5303300	1	13618800	13618900	1	13272000	13272100	1	16132600	16132700	1	8678000	8678100	2	26701700	26701800	1	8475000	8475100	1	28214300	28214400	1	11363400	11363500	7	17385200	17385300	2	5824000	5824100	3	31179900	31180000	3	10210300	10210400	2	20275100	20275200	2	8524200	8524300	3	16789300
1	7992200	7992300	1	5308900	5309000	1	13619200	13619300	1	13283800	13283900	1	16160000	16160100	1	8799000	8799100	2	26701800	26701900	1	8494700	8494800	1	28214400	28214500	1	11363500	11363600	7	17385300	17385400	2	5887800	5887900	3	31180000	31180100	3	10366000	10366100	2	20276300	20276400	2	8526100	8526200	3	17204600
1	7992400	7992500	1	5324900	5325000	1	13619800	13619900	1	13284200	13284300	1	16160100	16160200	1	8863200	8863300	2	26973900	26974000	1	8528700	8528800	1	28214500	28214600	1	11363600	11363700	7	18516900	18517000	2	5943300	5943400	3	31180100	31180200	3	10391300	10391400	2	20276600	20276700	2	8527200	8527300	3	17864300
1	8016900	8017000	1	5325000	5325100	1	13620500	13620600	1	13284300	13284400	1	16171700	16171800	1	8863300	8863400	2	26974000	26974100	1	8528800	8528900	1	28214600	28214700	1	11363700	11363800	7	18797400	18797500	2	6022000	6022100	3	31180700	31180800	3	10752200	10752300	2	20276700	20276800	2	8528600	8528700	3	17864400
1	8025800	8025900	1	5345100	5345200	1	13654300	13654400	1	13378200	13378300	1	16201000	16201100	1	8863600	8863700	2	27039100	27039200	1	8530000	8530100	1	28215600	28215700	1	11363800	11363900	7	18983800	18983900	2	6022100	6022200	3	31181600	31181700	3	10752300	10752400	2	20276800	20276900	2	8530100	8530200	3	17864500
1	8046200	8046300	1	5347000	5347100	1	13708500	13708600	1	13378300	13378400	1	16279100	16279200	1	8875100	8875200	2	27146300	27146400	1	8535100	8535200	1	28216300	28216400	1	11363900	11364000	7	19056600	19056700	2	6035200	6035300	3	31181800	31181900	3	11086400	11086500	2	20277800	20277900	2	8532300	8532400	3	17864700
1	8076200	8076300	1	5347100	5347200	1	13732000	13732100	1	13389900	13390000	1	16282200	16282300	1	8875500	8875600	2	27151900	27152000	1	8548000	8548100	1	28477100	28477200	1	11364100	11364200	7	19791700	19791800	2	6142900	6143000	3	31181900	31182000	3	11182500	11182600	2	20281800	20281900	2	8534100	8534200	3	17864800
1	8076300	8076400	1	5350700	5350800	1	13732100	13732200	1	13390000	13390100	1	16284400	16284500	1	8980600	8980700	2	27193300	27193400	1	8553200	8553300	1	28713900	28714000	1	11438000	11438100	7	20156400	20156500	2	6143000	6143100	3	31182000	31182100	3	11182600	11182700	2	20281900	20282000	2	8534200	8534300	3	17864900
1	8080400	8080500	1	5358100	5358200	1	13732200	13732300	1	13391000	13391100	1	16284600	16284700	1	8981800	8981900	2	27570100	27570200	1	8554100	8554200	1	28714000	28714100	1	11450400	11450500	7	20493300	20493400	2	6151200	6151300	3	31182100	31182200	3	11235400	11235500	2	20282000	20282100	2	8708400	8708500	3	17865100
1	8080500	8080600	1	5363600	5363700	1	13757400	13757500	1	13392000	13392100	1	16355200	16355300	1	8982300	8982400	2	27593900	27594000	1	8612100	8612200	1	28714200	28714300	1	11469600	11469700	7	22123500	22123600	2	6206900	6207000	3	31182200	31182300	3	11235500	11235600	2	20285000	20285100	2	8708500	8708600	3	17865200
1	8087600	8087700	1	5373400	5373500	1	13758100	13758200	1	13392200	13392300	1	16355400	16355500	1	8982400	8982500	2	27628500	27628600	1	8671600	8671700	1	28714300	28714400	1	11469700	11469800	7	22269900	22270000	2	6207000	6207100	3	31182800	31182900	3	11481600	11481700	2	20285200	20285300	2	8708900	8709000	3	17865300
1	8142700	8142800	1	5373500	5373600	1	13852000	13852100	1	13392300	13392400	1	16355500	16355600	1	8982700	8982800	2	27628600	27628700	1	8673400	8673500	1	28714500	28714600	1	11469900	11470000	7	22401300	22401400	2	6330500	6330600	3	31183500	31183600	3	11481700	11481800	2	20298400	20298500	2	8709000	8709100	3	17865400
1	8161600	8161700	1	5375600	5375700	1	13854100	13854200	1	13410400	13410500	1	16363500	16363600	1	8982800	8982900	2	27730900	27731000	1	8673700	8673800	1	28714600	28714700	1	11470500	11470600	7	22616400	22616500	2	6376200	6376300	3	31184000	31184100	3	11539800	11539900	2	20302000	20302100	2	8709100	8709200	3	17865500
1	8188100	8188200	1	5375700	5375800	1	13864500	13864600	1	13410700	13410800	1	16633900	16634000	1	8983300	8983400	2	27914000	27914100	1	8678000	8678100	1	28714900	28715000	1	11470900	11471000	7	23015600	23015700	2	6376300	6376400	3	31184100	31184200	3	11539900	11540000	2	20302100	20302200	2	8709300	8709400	3	17865700
1	8244300	8244400	1	5382100	5382200	1	13865300	13865400	1	13433200	13433300	1	16737100	16737200	1	9045500	9045600	2	27914100	27914200	1	8678200	8678300	1	28761700	28761800	1	11471000	11471100	7	23044400	23044500	2	6377700	6377800	3	31184200	31184300	3	11540000	11540100	2	20309200	20309300	2	8709400	8709500	3	17865800
1	8265700	8265800	1	5382400	5382500	1	13865400	13865500	1	13484100	13484200	1	16737200	16737300	1	9086800	9086900	2	27914500	27914600	1	8678300	8678400	1	28813800	28813900	1	11471100	11471200	7	23044500	23044600	2	6465200	6465300	3	31184300	31184400	3	11540100	11540200	2	20310100	20310200	2	8792400	8792500	3	17865900
1	8289700	8289800	1	5385400	5385500	1	13869200	13869300	1	13545000	13545100	1	16738100	16738200	1	9124200	9124300	2	27916000	27916100	1	8688000	8688100	1	28907600	28907700	1	11471200	11471300	7	23066800	23066900	2	6521700	6521800	3	31185600	31185700	3	11549600	11549700	2	20310200	20310300	2	8792500	8792600	3	17866000
1	8290800	8290900	1	5388300	5388400	1	13870100	13870200	1	13589800	13589900	1	16738500	16738600	1	9124300	9124400	2	27916100	27916200	1	8709400	8709500	1	29053800	29053900	1	11471300	11471400	7	23102000	23102100	2	6521800	6521900	3	31185800	31185900	3	11549700	11549800	2	20310300	20310400	2	8792600	8792700	3	17866100
1	8315600	8315700	1	5422000	5422100	1	13871600	13871700	1	13589900	13590000	1	16747000	16747100	1	9124400	9124500	2	27923000	27923100	1	8712400	8712500	1	29054000	29054100	1	11471400	11471500	7	23590500	23590600	2	6544300	6544400	3	31186100	31186200	3	12565100	12565200	2	20310400	20310500	2	8792700	8792800	3	17993500
1	8315700	8315800	1	5422100	5422200	1	13873800	13873900	1	13618800	13618900	1	16747100	16747200	1	9124900	9125000	2	27968900	27969000	1	8712500	8712600	1	29054200	29054300	1	11471500	11471600	7	23590600	23590700	2	6560200	6560300	3	31186200	31186300	3	12822200	12822300	2	20322800	20322900	2	8792800	8792900	3	18159700
1	8316900	8317000	1	5441400	5441500	1	13874600	13874700	1	13619200	13619300	1	16747300	16747400	1	9125100	9125200	2	27979100	27979200	1	8712600	8712700	1	29054300	29054400	1	11471600	11471700	7	23590700	23590800	2	6578500	6578600	3	31186300	31186400	3	12866200	12866300	2	20322900	20323000	2	8792900	8793000	3	18159800
1	8317000	8317100	1	5441600	5441700	1	13875200	13875300	1	13619300	13619400	1	16747400	16747500	1	9132100	9132200	2	28008400	28008500	1	8721900	8722000	1	29054400	29054500	1	11471700	11471800	7	23595900	23596000	2	6650300	6650400	3	31186400	31186500	3	12866300	12866400	2	20327400	20327500	2	8857400	8857500	3	18377000
1	8320200	8320300	1	5448700	5448800	1	13919200	13919300	1	13619800	13619900	1	16747500	16747600	1	9132300	9132400	2	28008500	28008600	1	8727400	8727500	1	29054500	29054600	1	11471800	11471900	7	23596000	23596100	2	6663900	6664000	3	31186900	31187000	3	13003000	13003100	2	20327500	20327600	2	8857500	8857600	3	19009500
1	8325000	8325100	1	5448800	5448900	1	13919300	13919400	1	13619900	13620000	1	16747700	16747800	1	9132600	9132700	2	28008600	28008700	1	8744500	8744600	1	29054600	29054700	1	11471900	11472000	7	23596100	23596200	2	6995300	6995400	3	31187000	31187100	3	13041200	13041300	2	20327600	20327700	2	8858100	8858200	3	19009600
1	8325100	8325200	1	5451100	5451200	1	13928800	13928900	1	13620500	13620600	1	16747800	16747900	1	9132700	9132800	2	28008700	28008800	1	8749100	8749200	1	29054700	29054800	1	11472000	11472100	7	23730900	23731000	2	6995400	6995500	3	31187700	31187800	3	13185000	13185100	2	20327700	20327800	2	8858200	8858300	3	19009700
1	8340200	8340300	1	5451800	5451900	1	13932100	13932200	1	13621000	13621100	1	16747900	16748000	1	9133000	9133100	2	28082400	28082500	1	8785500	8785600	1	29054800	29054900	1	11472100	11472200	7	23749500	23749600	2	7012000	7012100	3	31188100	31188200	3	13403000	13403100	2	20332600	20332700	2	9088600	9088700	3	21098700
1	8342900	8343000	1	5451900	5452000	1	13977500	13977600	1	13621300	13621400	1	16748200	16748300	1	9133100	9133200	2	28283500	28283600	1	8785600	8785700	1	29054900	29055000	1	11472200	11472300	7	24060000	24060100	2	7012200	7012300	3	31188200	31188300	3	13415600	13415700	2	20332700	20332800	2	9093100	9093200	3	21099100
1	8344000	8344100	1	5456100	5456200	1	13989600	13989700	1	13621400	13621500	1	16748800	16748900	1	9133300	9133400	2	28872900	28873000	1	8803600	8803700	1	29055500	29055600	1	11472500	11472600	7	24463800	24463900	2	7089700	7089800	3	31188300	31188400	3	13641300	13641400	2	20332800	20332900	2	9093200	9093300	3	22169800
1	8344100	8344200	1	5463100	5463200	1	13990100	13990200	1	13621800	13621900	1	16749100	16749200	1	9187600	9187700	2	29140500	29140600	1	8814000	8814100	1	29055600	29055700	1	11472600	11472700	7	24463900	24464000	2	7375500	7375600	3	31188500	31188600	3	13641400	13641500	2	20334100	20334200	2	9093300	9093400	3	22380300
1	8359800	8359900	1	5463200	5463300	1	14057200	14057300	1	13704600	13704700	1	16751600	16751700	1	9214300	9214400	2	29244300	29244400	1	8814100	8814200	1	29055700	29055800	1	11472700	11472800	7	24464000	24464100	2	7539300	7539400	3	31189100	31189200	3	13641800	13641900	2	20334200	20334300	2	9093400	9093500	3	22608700
1	8381700	8381800	1	5463300	5463400	1	14057300	14057400	1	13708500	13708600	1	16751700	16751800	1	9214900	9215000	2	29244400	29244500	1	8818600	8818700	1	29055800	29055900	1	11472800	11472900	7	24777000	24777100	2	7547700	7547800	3	31189400	31189500	3	13644900	13645000	2	20334300	20334400	2	9093500	9093600	3	22927400
1	8419400	8419500	1	5480800	5480900	1	14278400	14278500	1	13715600	13715700	1	16751800	16751900	1	9215000	9215100	2	29244500	29244600	1	8828600	8828700	1	29084100	29084200	1	11472900	11473000	7	24937900	24938000	2	7628600	7628700	3	31204600	31204700	3	13645000	13645100	2	20334400	20334500	2	9096900	9097000	3	22927500
1	8419700	8419800	1	5484500	5484600	1	14286200	14286300	1	13715700	13715800	1	16751900	16752000	1	9215100	9215200	2	29256500	29256600	1	8835200	8835300	1	29084300	29084400	1	11473000	11473100	7	24950700	24950800	2	7853400	7853500	3	31352100	31352200	3	13645500	13645600	2	20335700	20335800	2	9097000	9097100	3	23076800
1	8443500	8443600	1	5502000	5502100	1	14289800	14289900	1	13732900	13733000	1	16752100	16752200	1	9215200	9215300	2	29316500	29316600	1	8854600	8854700	1	29093300	29093400	1	11473100	11473200	7	25770100	25770200	2	7947500	7947600	3	31811700	31811800	3	14033700	14033800	2	20335800	20335900	2	9104500	9104600	3	23552600
1	8456400	8456500	1	5521800	5521900	1	14334400	14334500	1	13755800	13755900	1	16752200	16752300	1	9215700	9215800	2	29412200	29412300	1	8877400	8877500	1	29094400	29094500	1	11473200	11473300	7	25770200	25770300	2	8078800	8078900	3	31811800	31811900	3	14034000	14034100	2	20336900	20337000	2	9129400	9129500	3	23552700
1	8456600	8456700	1	5534400	5534500	1	14334700	14334800	1	13756600	13756700	1	16752300	16752400	1	9215800	9215900	2	29580900	29581000	1	8886000	8886100	1	29094700	29094800	1	11473300	11473400	7	25894700	25894800	2	8128600	8128700	3	31811900	31812000	3	14034300	14034400	2	20347300	20347400	2	9129500	9129600	3	23658400
1	8462600	8462700	1	5546200	5546300	1	14334800	14334900	1	13757400	13757500	1	16752400	16752500	1	9215900	9216000	2	29581000	29581100	1	8886100	8886200	1	29094900	29095000	1	11473400	11473500	7	26069100	26069200	2	8189700	8189800	3	31812000	31812100	3	14034400	14034500	2	20347600	20347700	2	9200100	9200200	3	23658500
1	8463000	8463100	1	5551700	5551800	1	14334900	14335000	1	13758700	13758800	1	16752900	16753000	1	9216000	9216100	2	29846000	29846100	1	8886200	8886300	1	29095000	29095100	1	11473500	11473600	7	26690200	26690300	2	8194700	8194800	3	31812100	31812200	3	14034600	14034700	2	20350200	20350300	2	9200300	9200400	3	23658600
1	8470500	8470600	1	5557400	5557500	1	14335100	14335200	1	13759000	13759100	1	16757400	16757500	1	9216100	9216200	2	30109100	30109200	1	8886300	8886400	1	29095600	29095700	1	11473600	11473700	7	27000700	27000800	2	8206500	8206600	3	31812200	31812300	3	14034700	14034800	2	20351500	20351600	2	9200600	9200700	3	23658700
1	8472700	8472800	1	5557500	5557600	1	14335200	14335300	1	13863000	13863100	1	16759600	16759700	1	9216200	9216300	2	30719000	30719100	1	8930100	8930200	1	29095700	29095800	1	11473700	11473800	7	27689200	27689300	2	8232900	8233000	3	31812300	31812400	3	14034800	14034900	2	20352600	20352700	2	9315900	9316000	3	23658800
1	8474100	8474200	1	5557600	5557700	1	14336200	14336300	1	13864500	13864600	1	16769400	16769500	1	9216300	9216400	2	30727500	30727600	1	8930200	8930300	1	29095800	29095900	1	11473800	11473900	7	28523400	28523500	2	8485000	8485100	3	31812400	31812500	3	14336900	14337000	2	20356700	20356800	2	9316100	9316200	3	23658900
1	8474900	8475000	1	5558000	5558100	1	14336400	14336500	1	13865400	13865500	1	16769500	16769600	1	9216500	9216600	2	30782700	30782800	1	8930300	8930400	1	29095900	29096000	1	11473900	11474000	8	217300	217400	2	8533500	8533600	3	31812500	31812600	3	14337000	14337100	2	20356900	20357000	2	9321600	9321700	3	23659000
1	8475000	8475100	1	5572200	5572300	1	14336500	14336600	1	13868500	13868600	1	16769800	16769900	1	9216600	9216700	2	30953100	30953200	1	8930400	8930500	1	29096000	29096100	1	11474000	11474100	8	217700	217800	2	8598300	8598400	3	31812600	31812700	3	14738500	14738600	2	20357000	20357100	2	9324000	9324100	3	23659100
1	8503800	8503900	1	5574100	5574200	1	14336600	14336700	1	13870100	13870200	1	16769900	16770000	1	9217000	9217100	2	30969100	30969200	1	8974000	8974100	1	29199300	29199400	1	11474100	11474200	8	1020000	1020100	2	8707100	8707200	3	31812700	31812800	3	14871900	14872000	2	20357100	20357200	2	9324100	9324200	3	23659200
1	8508600	8508700	1	5607300	5607400	1	14337100	14337200	1	13871200	13871300	1	16770000	16770100	1	9217600	9217700	2	31037400	31037500	1	8974100	8974200	1	29199400	29199500	1	11474200	11474300	8	1309400	1309500	2	8707200	8707300	3	31812800	31812900	3	14942400	14942500	2	20358200	20358300	2	9324900	9325000	3	23659300
1	8519400	8519500	1	5607400	5607500	1	14338500	14338600	1	13871600	13871700	1	16770200	16770300	1	9217800	9217900	2	31257900	31258000	1	8974200	8974300	1	29212500	29212600	1	11474300	11474400	8	1313500	1313600	2	8879900	8880000	3	31812900	31813000	3	15007400	15007500	2	20358300	20358400	2	9325400	9325500	3	23659500
1	8519500	8519600	1	5614400	5614500	1	14338700	14338800	1	13872600	13872700	1	16770300	16770400	1	9218200	9218300	2	31767100	31767200	1	8977600	8977700	1	29222400	29222500	1	11474400	11474500	8	1313600	1313700	2	8997400	8997500	3	31813000	31813100	3	15007500	15007600	2	20360600	20360700	2	9329100	9329200	3	23659600
1	8534000	8534100	1	5615300	5615400	1	14338800	14338900	1	13874600	13874700	1	16770400	16770500	1	9219200	9219300	2	31847100	31847200	1	8977700	8977800	1	29222500	29222600	1	11474500	11474600	8	1522800	1522900	2	9057500	9057600	3	31813100	31813200	3	15051200	15051300	2	20360700	20360800	2	9358700	9358800	3	23659700
1	8534100	8534200	1	5615500	5615600	1	14358500	14358600	1	13874800	13874900	1	16770500	16770600	1	9219700	9219800	2	31900300	31900400	1	8977800	8977900	1	29440800	29440900	1	11474600	11474700	8	1816900	1817000	2	9057600	9057700	3	31813200	31813300	3	15201500	15201600	2	20363500	20363600	2	9403100	9403200	3	23659800
1	8535000	8535100	1	5615600	5615700	1	14358600	14358700	1	13875200	13875300	1	16770700	16770800	1	9220300	9220400	2	31900400	31900500	1	8982300	8982400	1	29598600	29598700	1	11474800	11474900	8	1822300	1822400	2	9454000	9454100	3	31813300	31813400	3	15290800	15290900	2	20363600	20363700	2	9403500	9403600	3	23659900
1	8535100	8535200	1	5620400	5620500	1	14358700	14358800	1	13905800	13905900	1	16770900	16771000	1	9220500	9220600	2	31900700	31900800	1	8993400	8993500	1	29838100	29838200	1	11474900	11475000	8	1847200	1847300	2	9454500	9454600	3	31813400	31813500	3	15290900	15291000	2	20363700	20363800	2	9403800	9403900	3	24167700
1	8548000	8548100	1	5622000	5622100	1	14364400	14364500	1	13973400	13973500	1	16771000	16771100	1	9220600	9220700	2	31900800	31900900	1	8993500	8993600	1	29931800	29931900	1	11475000	11475100	8	3430500	3430600	2	9470300	9470400	3	31813500	31813600	3	15639400	15639500	2	20397000	20397100	2	9406800	9406900	3	24203200
1	8590100	8590200	1	5632000	5632100	1	14433200	14433300	1	14066800	14066900	1	16771400	16771500	1	9224300	9224400	2	32027800	32027900	1	8994400	8994500	1	29931900	29932000	1	11475100	11475200	8	3430900	3431000	2	9786700	9786800	3	31813600	31813700	3	15914000	15914100	2	20398000	20398100	2	9684100	9684200	3	25216200
1	8654900	8655000	1	5634800	5634900	1	14437500	14437600	1	14075400	14075500	1	16771800	16771900	1	9250000	9250100	2	32097900	32098000	1	9002300	9002400	1	30238900	30239000	1	11475300	11475400	8	3876200	3876300	2	9894000	9894100	3	31813700	31813800	3	16120200	16120300	2	20403800	20403900	2	9684300	9684400	3	25286600
1	8655100	8655200	1	5637200	5637300	1	14455400	14455500	1	14208600	14208700	1	16771900	16772000	1	9250100	9250200	2	32098000	32098100	1	9008300	9008400	1	30445800	30445900	1	11475500	11475600	8	3876300	3876400	2	9902400	9902500	3	31813800	31813900	3	16120300	16120400	2	20419300	20419400	2	9754900	9755000	3	26279800
1	8655400	8655500	1	5637600	5637700	1	14455500	14455600	1	14208700	14208800	1	16772000	16772100	1	9335600	9335700	2	32127500	32127600	1	9008400	9008500	1	30469600	30469700	1	11475600	11475700	8	4713000	4713100	2	9902500	9902600	3	31813900	31814000	3	16183100	16183200	2	20419400	20419500	2	10177500	10177600	3	26279900
1	8655500	8655600	1	5637700	5637800	1	14455700	14455800	1	14275700	14275800	1	16772300	16772400	1	9351500	9351600	2	32309000	32309100	1	9017700	9017800	1	30478700	30478800	1	11475700	11475800	8	5474900	5475000	2	10084300	10084400	3	31814000	31814100	3	16224300	16224400	2	20419600	20419700	2	10177600	10177700	3	26459000
1	8674700	8674800	1	5638600	5638700	1	14479100	14479200	1	14282500	14282600	1	16772400	16772500	1	9369000	9369100	2	32352800	32352900	1	9017800	9017900	1	30644400	30644500	1	11475900	11476000	8	5604400	5604500	2	10084400	10084500	3	31814100	31814200	3	16224400	16224500	2	20655500	20655600	2	10177700	10177800	3	26459100
1	8677400	8677500	1	5649300	5649400	1	14479200	14479300	1	14287900	14288000	1	16772500	16772600	1	9458400	9458500	2	32429500	32429600	1	9029200	9029300	1	30686400	30686500	1	11476000	11476100	8	5835900	5836000	2	10088100	10088200	3	31814200	31814300	3	16224500	16224600	2	20770300	20770400	2	10231900	10232000	3	26460100
1	8677500	8677600	1	5649600	5649700	1	14491900	14492000	1	14333100	14333200	1	16772800	16772900	1	9548200	9548300	2	32429600	32429700	1	9029300	9029400	1	30724100	30724200	1	11490400	11490500	8	5997700	5997800	2	10157000	10157100	3	31814300	31814400	3	16788400	16788500	2	21024300	21024400	2	10232300	10232400	3	27345100
1	8688000	8688100	1	5651100	5651200	1	14492500	14492600	1	14333200	14333300	1	16773100	16773200	1	9548300	9548400	2	32452300	32452400	1	9035200	9035300	1	30724300	30724400	1	11509800	11509900	8	7589600	7589700	2	10370200	10370300	3	31814400	31814500	3	16788900	16789000	2	21043000	21043100	2	10232400	10232500	3	27345300
1	8717300	8717400	1	5658100	5658200	1	14497700	14497800	1	14333500	14333600	1	16773200	16773300	1	9594100	9594200	2	32641900	32642000	1	9035300	9035400	1	30724500	30724600	1	11509900	11510000	8	7591000	7591100	2	10370300	10370400	3	31814500	31814600	3	16878900	16879000	2	21447500	21447600	2	10233500	10233600	3	27665600
1	8724400	8724500	1	5658200	5658300	1	14516500	14516600	1	14333600	14333700	1	16773300	16773400	1	9597600	9597700	2	32842900	32843000	1	9072100	9072200	1	30762000	30762100	1	11510200	11510300	8	7616600	7616700	2	10533400	10533500	3	31814700	31814800	3	16879000	16879100	2	21447600	21447700	2	10234400	10234500	3	27665700
1	8724500	8724600	1	5660100	5660200	1	14516600	14516700	1	14333700	14333800	1	16773700	16773800	1	9620000	9620100	2	32843000	32843100	1	9086700	9086800	1	30762400	30762500	1	11510300	11510400	8	7616700	7616800	2	10622200	10622300	3	31815000	31815100	3	17204600	17204700	2	21517900	21518000	2	10234600	10234700	3	28422700
1	8727100	8727200	1	5680500	5680600	1	14609700	14609800	1	14333800	14333900	1	16774300	16774400	1	9620100	9620200	2	32858400	32858500	1	9086800	9086900	1	30787100	30787200	1	11522000	11522100	8	7979500	7979600	2	10804100	10804200	3	31815100	31815200	3	17993500	17993600	2	22051400	22051500	2	10234800	10234900	3	29071700
1	8750300	8750400	1	5681400	5681500	1	14609800	14609900	1	14333900	14334000	1	16775700	16775800	1	9620200	9620300	2	32920000	32920100	1	9103900	9104000	1	30809400	30809500	1	11524900	11525000	8	8295800	8295900	2	11020000	11020100	3	31815200	31815300	3	18130600	18130700	2	22162600	22162700	2	10270800	10270900	3	29382300
1	8814100	8814200	1	5688000	5688100	1	14646700	14646800	1	14334200	14334300	1	16776100	16776200	1	9621100	9621200	2	33037500	33037600	1	9122400	9122500	1	30809500	30809600	1	11535900	11536000	8	8423800	8423900	2	11057500	11057600	3	31815300	31815400	3	18192900	18193000	2	22162700	22162800	2	10335100	10335200	3	29642300
1	8846800	8846900	1	5698100	5698200	1	14677800	14677900	1	14334400	14334500	1	16777000	16777100	1	9621200	9621300	2	33435600	33435700	1	9122500	9122600	1	30809600	30809700	1	11557700	11557800	8	8458700	8458800	2	11098800	11098900	3	31815400	31815500	3	18510100	18510200	2	22502100	22502200	2	10335200	10335300	3	31179000
1	8861200	8861300	1	5698300	5698400	1	14677900	14678000	1	14334600	14334700	1	16778000	16778100	1	9621400	9621500	2	33435800	33435900	1	9124400	9124500	1	30809800	30809900	1	11557800	11557900	8	8458800	8458900	2	11174000	11174100	3	31815500	31815600	3	18510200	18510300	2	22829500	22829600	2	10335300	10335400	3	31179500
1	8861300	8861400	1	5698400	5698500	1	14678000	14678100	1	14334700	14334800	1	16778700	16778800	1	9621500	9621600	2	33550500	33550600	1	9132300	9132400	1	30811500	30811600	1	11569800	11569900	8	8464000	8464100	2	11300900	11301000	3	31815600	31815700	3	19955000	19955100	2	22834000	22834100	2	10587600	10587700	3	31179600
1	8886100	8886200	1	5716300	5716400	1	14693000	14693100	1	14334800	14334900	1	16778900	16779000	1	9621700	9621800	2	33916300	33916400	1	9132600	9132700	1	31429300	31429400	1	11638800	11638900	8	8464100	8464200	2	11372900	11373000	3	31815700	31815800	3	20162100	20162200	2	22834300	22834400	2	10631200	10631300	3	31179700
1	8886200	8886300	1	5716400	5716500	1	14809100	14809200	1	14334900	14335000	1	16779200	16779300	1	9622300	9622400	2	33916600	33916700	1	9132700	9132800	1	31429600	31429700	1	11638900	11639000	8	9245300	9245400	2	11383300	11383400	3	31815900	31816000	3	20162200	20162300	2	22839900	22840000	2	10631300	10631400	3	31179800
1	8908900	8909000	1	5735100	5735200	1	14860400	14860500	1	14335000	14335100	1	16779300	16779400	1	9622500	9622600	2	33916800	33916900	1	9170400	9170500	1	31462000	31462100	1	11639000	11639100	8	9245400	9245500	2	11521400	11521500	3	31816100	31816200	3	20388700	20388800	2	22840000	22840100	2	10658100	10658200	3	31179900
1	8930200	8930300	1	5747300	5747400	1	14877400	14877500	1	14335100	14335200	1	16779400	16779500	1	9622600	9622700	2	34024200	34024300	1	9187600	9187700	1	31462300	31462400	1	11640500	11640600	8	9483500	9483600	2	11660600	11660700	3	31816200	31816300	3	20388800	20388900	2	22840100	22840200	2	10931600	10931700	3	31180000
1	8930400	8930500	1	5752300	5752400	1	14894300	14894400	1	14335600	14335700	1	16779600	16779700	1	9622800	9622900	2	34059300	34059400	1	9187700	9187800	1	32157000	32157100	1	11640600	11640700	8	9483600	9483700	2	11660700	11660800	3	31816500	31816600	3	21900200	21900300	2	22845700	22845800	2	10931700	10931800	3	31180100
1	8987000	8987100	1	5752600	5752700	1	14894400	14894500	1	14336100	14336200	1	16779700	16779800	1	9622900	9623000	2	34284200	34284300	1	9215100	9215200	1	32205600	32205700	1	11668100	11668200	8	10537900	10538000	2	11712300	11712400	3	31818100	31818200	3	21900300	21900400	2	22845800	22845900	2	10931800	10931900	3	31180300
1	8987100	8987200	1	5753300	5753400	1	14912400	14912500	1	14336200	14336300	1	16779800	16779900	1	9623100	9623200	2	34284400	34284500	1	9215200	9215300	1	32214200	32214300	1	11674200	11674300	8	10749800	10749900	2	11942100	11942200	3	31819200	31819300	3	22169800	22169900	2	22845900	22846000	2	10932400	10932500	3	31180600
1	8987200	8987300	1	5754400	5754500	1	14912500	14912600	1	14336400	14336500	1	16780100	16780200	1	9713200	9713300	2	34520800	34520900	1	9220500	9220600	1	32214400	32214500	1	11674300	11674400	8	10885000	10885100	2	11942200	11942300	3	31819300	31819400	3	22380300	22380400	2	22849400	22849500	2	10956200	10956300	3	31180700
1	8994400	8994500	1	5772800	5772900	1	14971200	14971300	1	14336800	14336900	1	16780700	16780800	1	9774100	9774200	2	34529400	34529500	1	9220600	9220700	1	32214800	32214900	1	11764400	11764500	8	11764100	11764200	2	12005600	12005700	3	32134100	32134200	3	22631600	22631700	2	22852300	22852400	2	10956400	10956500	3	31180800
1	9001900	9002000	1	5772900	5773000	1	14999900	15000000	1	14336900	14337000	1	16780900	16781000	1	9778200	9778300	2	34529500	34529600	1	9250000	9250100	1	32215100	32215200	1	11841100	11841200	8	14086600	14086700	2	12010500	12010600	3	32398800	32398900	3	22741600	22741700	2	22853300	22853400	2	11195900	11196000	3	31180900
1	9002000	9002100	1	5780900	5781000	1	15039100	15039200	1	14337000	14337100	1	16781000	16781100	1	9778300	9778400	2	34536800	34536900	1	9250100	9250200	1	32215200	32215300	1	11928600	11928700	8	14470200	14470300	2	12058200	12058300	3	32399000	32399100	3	22822000	22822100	2	22855200	22855300	2	11196000	11196100	3	31181600
1	9024300	9024400	1	5786600	5786700	1	15039800	15039900	1	14337900	14338000	1	16781300	16781400	1	9832800	9832900	2	34538000	34538100	1	9267700	9267800	1	32215400	32215500	1	11928700	11928800	8	14470300	14470400	2	12064800	12064900	3	32438400	32438500	3	22927400	22927500	2	22856700	22856800	2	11248300	11248400	3	31181800
1	9040100	9040200	1	5823900	5824000	1	15071000	15071100	1	14338000	14338100	1	16781500	16781600	1	9832900	9833000	2	34538100	34538200	1	9293000	9293100	1	32215500	32215600	1	11928900	11929000	8	14470400	14470500	2	12092400	12092500	3	32438500	32438600	3	22927500	22927600	2	22859700	22859800	2	11248500	11248600	3	31181900
1	9040200	9040300	1	5834600	5834700	1	15071400	15071500	1	14338200	14338300	1	16781700	16781800	1	9833700	9833800	2	34580500	34580600	1	9293100	9293200	1	32215600	32215700	1	11929200	11929300	8	16683900	16684000	2	12092700	12092800	3	32439400	32439500	3	22973900	22974000	2	22859800	22859900	2	11311100	11311200	3	31182000
1	9040300	9040400	1	5847800	5847900	1	15071500	15071600	1	14338500	14338600	1	16781800	16781900	1	9833800	9833900	2	34836600	34836700	1	9295800	9295900	1	32216200	32216300	1	11929300	11929400	8	18189000	18189100	2	12092800	12092900	3	32440300	32440400	3	23383000	23383100	2	22859900	22860000	2	11346600	11346700	3	31182100
1	9040400	9040500	1	5871900	5872000	1	15071600	15071700	1	14338700	14338800	1	16781900	16782000	1	9834000	9834100	2	34895800	34895900	1	9310500	9310600	1	32576600	32576700	1	11933300	11933400	8	18189100	18189200	2	12642700	12642800	3	32440400	32440500	3	23383100	23383200	2	22860800	22860900	2	11346700	11346800	3	31182200
1	9040600	9040700	1	5872000	5872100	1	15111300	15111400	1	14338800	14338900	1	16782000	16782100	1	9834100	9834200	2	34897700	34897800	1	9323400	9323500	1	32602500	32602600	1	11936900	11937000	8	18299400	18299500	2	12738800	12738900	3	32589100	32589200	3	23552600	23552700	2	22860900	22861000	2	11346800	11346900	3	31182300
1	9040700	9040800	1	5875400	5875500	1	15155600	15155700	1	14338900	14339000	1	16782100	16782200	1	9834800	9834900	2	35129700	35129800	1	9332700	9332800	1	32602600	32602700	1	11937700	11937800	8	18507400	18507500	2	12738900	12739000	3	34333200	34333300	3	23658400	23658500	2	22861000	22861100	2	11346900	11347000	3	31182400
1	9040900	9041000	1	5875500	5875600	1	15161100	15161200	1	14339000	14339100	1	16784400	16784500	1	9834900	9835000	2	35260700	35260800	1	9334300	9334400	1	32802600	32802700	1	11938200	11938300	8	18992100	18992200	2	12857900	12858000	3	34333300	34333400	3	23658500	23658600	2	22861100	22861200	2	11347000	11347100	3	31182700
1	9041000	9041100	1	5903600	5903700	1	15172900	15173000	1	14339100	14339200	1	16784500	16784600	1	9835000	9835100	2	35266000	35266100	1	9335600	9335700	1	33014400	33014500	1	11938500	11938600	8	19033500	19033600	2	13021800	13021900	3	34333400	34333500	3	23658600	23658700	2	22861200	22861300	2	11347100	11347200	3	31182800
1	9041100	9041200	1	5903900	5904000	1	15173000	15173100	1	14339200	14339300	1	16785200	16785300	1	9835200	9835300	2	35269000	35269100	1	9336400	9336500	1	33214100	33214200	1	11939300	11939400	8	19773500	19773600	2	13021900	13022000	3	34489100	34489200	3	23658700	23658800	2	22861300	22861400	2	11347200	11347300	3	31182900
1	9041200	9041300	1	5904500	5904600	1	15183500	15183600	1	14339300	14339400	1	16785400	16785500	1	9835300	9835400	2	35323500	35323600	1	9339100	9339200	1	33447300	33447400	1	11984400	11984500	8	19773600	19773700	2	13160600	13160700	3	34489200	34489300	3	23658800	23658900	2	22864200	22864300	2	11347300	11347400	3	31183000
1	9041300	9041400	1	5906700	5906800	1	15269000	15269100	1	14339400	14339500	1	16785600	16785700	1	9850800	9850900	2	35377200	35377300	1	9339200	9339300	1	33846200	33846300	1	12006800	12006900	8	19837000	19837100	2	13160700	13160800	3	34560700	34560800	3	23658900	23659000	2	22864300	22864400	2	11565100	11565200	3	31183500
1	9041500	9041600	1	5917000	5917100	1	15269800	15269900	1	14339500	14339600	1	16786100	16786200	1	9873000	9873100	2	35405400	35405500	1	9361100	9361200	1	33952700	33952800	1	12017700	12017800	8	20096400	20096500	2	13162200	13162300	3	34562300	34562400	3	23659000	23659100	2	22864400	22864500	2	11824800	11824900	3	31183700
1	9041700	9041800	1	5917100	5917200	1	15303000	15303100	1	14358500	14358600	1	16786400	16786500	1	9873100	9873200	2	35405500	35405600	1	9362800	9362900	1	34066500	34066600	1	12017800	12017900	8	20116800	20116900	2	13162300	13162400	3	34562400	34562500	3	23659100	23659200	2	22888400	22888500	2	11897600	11897700	3	31183900
1	9041800	9041900	1	5917200	5917300	1	15371600	15371700	1	14358700	14358800	1	16786700	16786800	1	9921700	9921800	2	35594900	35595000	1	9400400	9400500	1	34106100	34106200	1	12141700	12141800	8	20116900	20117000	2	13177900	13178000	3	35059200	35059300	3	23659200	23659300	2	22888500	22888600	2	11897900	11898000	3	31184000
1	9042000	9042100	1	5917300	5917400	1	15371700	15371800	1	14399300	14399400	1	16786800	16786900	1	9944600	9944700	2	35820500	35820600	1	9452800	9452900	1	34106200	34106300	1	12141800	12141900	8	20442400	20442500	2	13316400	13316500	3	35059300	35059400	3	23659300	23659400	2	22898200	22898300	2	11898000	11898100	3	31184100
1	9042300	9042400	1	5917500	5917600	1	15374500	15374600	1	14495800	14495900	1	16787300	16787400	1	9977800	9977900	3	191600	191700	1	9458400	9458500	1	34218700	34218800	1	12141900	12142000	8	20674200	20674300	2	13372400	13372500	3	35123200	35123300	3	23659500	23659600	2	22898300	22898400	2	11898100	11898200	3	31184200
1	9042400	9042500	1	5917600	5917700	1	15374800	15374900	1	14496700	14496800	1	16787400	16787500	1	9984300	9984400	3	191700	191800	1	9463900	9464000	1	34351500	34351600	1	12142000	12142100	8	20688600	20688700	2	13420400	13420500	3	35334800	35334900	3	23659600	23659700	2	22898600	22898700	2	11898200	11898300	3	31184300
1	9042500	9042600	1	5917700	5917800	1	15392600	15392700	1	14497700	14497800	1	16787800	16787900	1	9989600	9989700	3	353500	353600	1	9531900	9532000	1	34351600	34351700	1	12142200	12142300	8	21106000	21106100	2	15214200	15214300	3	35360500	35360600	3	23659700	23659800	2	22898700	22898800	2	11898300	11898400	3	31184500
1	9042600	9042700	1	5924100	5924200	1	15399700	15399800	1	14501400	14501500	1	16788100	16788200	1	10001300	10001400	3	449000	449100	1	9543600	9543700	1	34351700	34351800	1	12142600	12142700	8	21106100	21106200	2	15214300	15214400	3	35360600	35360700	3	23659800	23659900	2	23236300	23236400	2	11898400	11898500	3	31184800
1	9043300	9043400	1	5931400	5931500	1	15399800	15399900	1	14516600	14516700	1	16790800	16790900	1	10061700	10061800	3	743900	744000	1	9543700	9543800	1	34351800	34351900	1	12142700	12142800	8	22316200	22316300	2	15308600	15308700	3	35428500	35428600	3	23659900	23660000	2	23236400	23236500	2	11899200	11899300	3	31185000
1	9049300	9049400	1	5931600	5931700	1	15404900	15405000	1	14534500	14534600	1	16796100	16796200	1	10061800	10061900	3	898900	899000	1	9548200	9548300	1	34351900	34352000	1	12142800	12142900	8	22318500	22318600	2	15486400	15486500	3	35480300	35480400	3	23660500	23660600	2	23520900	23521000	2	11899500	11899600	3	31185100
1	9072000	9072100	1	5967600	5967700	1	15405000	15405100	1	14681100	14681200	1	16801100	16801200	1	10064600	10064700	3	1048100	1048200	1	9548300	9548400	1	34547800	34547900	1	12142900	12143000	8	22376000	22376100	2	15590000	15590100	3	35603300	35603400	3	23660600	23660700	2	23768600	23768700	2	11900300	11900400	3	31185600
1	9072100	9072200	1	5968200	5968300	1	15432800	15432900	1	14692000	14692100	1	16803800	16803900	1	10064700	10064800	3	1136700	1136800	1	9548600	9548700	1	34787900	34788000	1	12143000	12143100	8	22555600	22555700	2	15662700	15662800	3	35603400	35603500	3	23660800	23660900	2	24021900	24022000	2	11900400	11900500	3	31185700
1	9084100	9084200	1	5988900	5989000	1	15432900	15433000	1	14693000	14693100	1	16804300	16804400	1	10064800	10064900	3	1136800	1136900	1	9557300	9557400	1	35037200	35037300	1	12143100	12143200	8	22824600	22824700	2	15828800	15828900	3	35617700	35617800	3	23661300	23661400	2	24022000	24022100	2	11900800	11900900	3	31185800
1	9086700	9086800	1	5999700	5999800	1	15434300	15434400	1	14696700	14696800	1	16804400	16804500	1	10064900	10065000	3	1159700	1159800	1	9562600	9562700	1	35037300	35037400	1	12143200	12143300	8	22825100	22825200	2	15956100	15956200	3	35617800	35617900	3	24160100	24160200	2	24307100	24307200	2	11917800	11917900	3	31186000
1	9086800	9086900	1	6000000	6000100	1	15434600	15434700	1	14730600	14730700	1	16804500	16804600	1	10065000	10065100	3	1209400	1209500	1	9586000	9586100	1	35037500	35037600	1	12143300	12143400	8	22825200	22825300	2	16120700	16120800	4	793400	793500	3	25247400	25247500	2	24313500	24313600	2	12070200	12070300	3	31186100
1	9103900	9104000	1	6002300	6002400	1	15434800	15434900	1	14769000	14769100	1	16804600	16804700	1	10065200	10065300	3	1231000	1231100	1	9592000	9592100	1	35037600	35037700	1	12143400	12143500	8	22825500	22825600	2	16204800	16204900	4	2085700	2085800	3	25619100	25619200	2	24313600	24313700	2	12078900	12079000	3	31186200
1	9109200	9109300	1	6014300	6014400	1	15434900	15435000	1	14798000	14798100	1	16804800	16804900	1	10071300	10071400	3	1356800	1356900	1	9592200	9592300	1	35037900	35038000	1	12143500	12143600	8	22826000	22826100	2	16317600	16317700	4	2085800	2085900	3	25801100	25801200	2	24564100	24564200	2	12098800	12098900	3	31186300
1	9131900	9132000	1	6014400	6014500	1	15435100	15435200	1	14798100	14798200	1	16804900	16805000	1	10071400	10071500	3	1380600	1380700	1	9593700	9593800	1	35048500	35048600	1	12143700	12143800	8	22875700	22875800	2	16317700	16317800	4	2085900	2086000	3	25801200	25801300	2	24564200	24564300	2	12099100	12099200	3	31186400
1	9149000	9149100	1	6016800	6016900	1	15498500	15498600	1	14809300	14809400	1	16805000	16805100	1	10071500	10071600	3	1474400	1474500	1	9593800	9593900	1	35188800	35188900	1	12144000	12144100	8	23093600	23093700	2	16353000	16353100	4	3200400	3200500	3	25801400	25801500	2	24564400	24564500	2	12099200	12099300	3	31186600
1	9159400	9159500	1	6033500	6033600	1	15526000	15526100	1	14809400	14809500	1	16805100	16805200	1	10071600	10071700	3	1576100	1576200	1	9594100	9594200	1	35190500	35190600	1	12144100	12144200	8	23095200	23095300	2	16386200	16386300	4	3781500	3781600	3	26007700	26007800	2	24564500	24564600	2	12099300	12099400	3	31186800
1	9170400	9170500	1	6040200	6040300	1	15611800	15611900	1	14860800	14860900	1	16807600	16807700	1	10107200	10107300	3	1603800	1603900	1	9594200	9594300	1	35198800	35198900	1	12221600	12221700	8	24028600	24028700	2	16386300	16386400	4	3987500	3987600	3	26009000	26009100	2	24564700	24564800	2	12099400	12099500	3	31186900
1	9187600	9187700	1	6040300	6040400	1	15683400	15683500	1	14870300	14870400	1	16807900	16808000	1	10150800	10150900	3	1711900	1712000	1	9594400	9594500	1	35425300	35425400	1	12311700	12311800	8	24028700	24028800	2	16564200	16564300	4	5288700	5288800	3	26009100	26009200	2	24678800	24678900	2	12338800	12338900	3	31187000
1	9212300	9212400	1	6043100	6043200	1	15758800	15758900	1	14870400	14870500	1	16808500	16808600	1	10173700	10173800	3	1840400	1840500	1	9595400	9595500	1	35425500	35425600	1	12318800	12318900	8	24396800	24396900	2	16603500	16603600	4	5827300	5827400	3	26268200	26268300	2	24678900	24679000	2	12338900	12339000	3	31187100
1	9214200	9214300	1	6043200	6043300	1	15759100	15759200	1	14872200	14872300	1	16808800	16808900	1	10175000	10175100	3	2002100	2002200	1	9595500	9595600	1	35567500	35567600	1	12318900	12319000	8	24396900	24397000	2	16709100	16709200	4	5870200	5870300	3	26455100	26455200	2	24816500	24816600	2	12385800	12385900	3	31187200
1	9215800	9215900	1	6043400	6043500	1	15769100	15769200	1	14875800	14875900	1	16808900	16809000	1	10176900	10177000	3	2034300	2034400	1	9595800	9595900	1	35567600	35567700	1	12401700	12401800	8	24965500	24965600	2	16809200	16809300	4	6100200	6100300	3	26456700	26456800	2	24975300	24975400	2	13190000	13190100	3	31187800
1	9250000	9250100	1	6061000	6061100	1	15808000	15808100	1	14875900	14876000	1	16810300	16810400	1	10177000	10177100	3	2130600	2130700	1	9612400	9612500	1	35577400	35577500	1	12420700	12420800	8	25567900	25568000	2	16839300	16839400	4	6524900	6525000	3	26456800	26456900	2	24975400	24975500	2	13254900	13255000	3	31187900
1	9250100	9250200	1	6062500	6062600	1	15808800	15808900	1	14934700	14934800	1	16810400	16810500	1	10177100	10177200	3	2875800	2875900	1	9653100	9653200	1	35577500	35577600	1	12429600	12429700	8	25568000	25568100	2	16884000	16884100	4	6525000	6525100	3	26459100	26459200	2	25342700	25342800	2	13272800	13272900	3	31188000
1	9255700	9255800	1	6062600	6062700	1	15933100	15933200	1	14971600	14971700	1	16810500	16810600	1	10182000	10182100	3	2882100	2882200	1	9669400	9669500	1	35577700	35577800	1	12483200	12483300	8	25569000	25569100	2	16884100	16884200	4	6856400	6856500	3	26460100	26460200	2	25410000	25410100	2	13440900	13441000	3	31188100
1	9292700	9292800	1	6064900	6065000	1	15933200	15933300	1	14978300	14978400	1	16811100	16811200	1	10182100	10182200	3	2903400	2903500	1	9701900	9702000	1	35669400	35669500	1	12550500	12550600	8	25569100	25569200	2	16965500	16965600	4	7833500	7833600	3	26461000	26461100	2	25410100	25410200	2	13784500	13784600	3	31188200
1	9295700	9295800	1	6066400	6066500	1	15941300	15941400	1	15017000	15017100	1	16811200	16811300	1	10185900	10186000	3	2957900	2958000	1	9702000	9702100	1	35669700	35669800	1	12563400	12563500	8	25591100	25591200	2	17144700	17144800	4	8213900	8214000	3	27340600	27340700	2	25510400	25510500	2	13785300	13785400	3	31188300
1	9295800	9295900	1	6071700	6071800	1	15956300	15956400	1	15038100	15038200	1	16811400	16811500	1	10186100	10186200	3	3086300	3086400	1	9713100	9713200	1	35670100	35670200	1	12577900	12578000	8	25908900	25909000	2	17144800	17144900	4	8249300	8249400	3	27340700	27340800	2	25510500	25510600	2	13800400	13800500	3	31188400
1	9300700	9300800	1	6074800	6074900	1	16021000	16021100	1	15039100	15039200	1	16811500	16811600	1	10186300	10186400	3	3396500	3396600	1	9713300	9713400	1	36027200	36027300	1	12678300	12678400	8	26107800	26107900	2	17154100	17154200	4	8340300	8340400	3	27340800	27340900	2	25538500	25538600	2	13800700	13800800	3	31188500
1	9313900	9314000	1	6081000	6081100	1	16044100	16044200	1	15064800	15064900	1	16811600	16811700	1	10186400	10186500	3	3413100	3413200	1	9747400	9747500	1	36038000	36038100	1	12714400	12714500	8	26160700	26160800	2	17229000	17229100	4	8340600	8340700	3	27610400	27610500	2	25583100	25583200	2	13801000	13801100	3	31188700
1	9324300	9324400	1	6081100	6081200	1	16057300	16057400	1	15073800	15073900	1	16811700	16811800	1	10186500	10186600	3	3447900	3448000	1	9764600	9764700	1	36178800	36178900	1	12718000	12718100	8	26161500	26161600	2	17568700	17568800	4	8340900	8341000	3	27610500	27610600	2	25800700	25800800	2	13892000	13892100	3	31188800
1	9329500	9329600	1	6090600	6090700	1	16090800	16090900	1	15116200	15116300	1	16811900	16812000	1	10186700	10186800	3	3569300	3569400	1	9774000	9774100	1	36197400	36197500	1	12909900	12910000	8	26355300	26355400	2	17626600	17626700	4	8341100	8341200	3	27611000	27611100	2	25800800	25800900	2	13892300	13892400	3	31188900
1	9329700	9329800	1	6090700	6090800	1	16110900	16111000	1	15172900	15173000	1	16812000	16812100	1	10186800	10186900	3	3569400	3569500	1	9774100	9774200	1	36321400	36321500	1	12989200	12989300	8	26355400	26355500	2	17987100	17987200	4	8562600	8562700	3	27611100	27611200	2	26222800	26222900	2	13932800	13932900	3	31189000
1	9329800	9329900	1	6090800	6090900	1	16111000	16111100	1	15174500	15174600	1	16812600	16812700	1	10186900	10187000	3	3688900	3689000	1	9778100	9778200	1	36321500	36321600	1	13029500	13029600	8	26471500	26471600	2	18032400	18032500	4	9090500	9090600	3	27611200	27611300	2	26263400	26263500	2	14196800	14196900	3	31189100
1	9336500	9336600	1	6097500	6097600	1	16123800	16123900	1	15176200	15176300	1	16813200	16813300	1	10187200	10187300	3	3813400	3813500	1	9778200	9778300	1	36492700	36492800	1	13039500	13039600	8	26471600	26471700	2	18038800	18038900	4	9090800	9090900	3	27611300	27611400	2	26263500	26263600	2	14242000	14242100	3	31189200
1	9351500	9351600	1	6097600	6097700	1	16159400	16159500	1	15176600	15176700	1	16813300	16813400	1	10187300	10187400	3	3832600	3832700	1	9778300	9778400	1	36585400	36585500	1	13122400	13122500	8	26530900	26531000	2	18065200	18065300	4	9094200	9094300	3	27611400	27611500	2	26264000	26264100	2	14245700	14245800	3	31189700
1	9369000	9369100	1	6098800	6098900	1	16160000	16160100	1	15176700	15176800	1	16813500	16813600	1	10187400	10187500	3	3832700	3832800	1	9904400	9904500	1	36585500	36585600	1	13147400	13147500	8	26588400	26588500	2	18307600	18307700	4	9094300	9094400	3	27611500	27611600	2	26264300	26264400	2	14245900	14246000	3	31206700
1	9370300	9370400	1	6098900	6099000	1	16160100	16160200	1	15183400	15183500	1	16813600	16813700	1	10187900	10188000	3	3942500	3942600	1	9904500	9904600	1	36585700	36585800	1	13179200	13179300	8	26647400	26647500	2	18307700	18307800	4	9094400	9094500	3	27611600	27611700	2	26264800	26264900	2	14246100	14246200	3	31206800
1	9392500	9392600	1	6099700	6099800	1	16161700	16161800	1	15183500	15183600	1	16813700	16813800	1	10258700	10258800	3	4001000	4001100	1	9908300	9908400	1	36585800	36585900	1	13209900	13210000	8	26648800	26648900	2	18409400	18409500	4	9094500	9094600	3	27611700	27611800	2	26264900	26265000	2	14246200	14246300	3	31335100
1	9418100	9418200	1	6099800	6099900	1	16164300	16164400	1	15272700	15272800	1	16813900	16814000	1	10278300	10278400	3	4034400	4034500	1	9908400	9908500	1	36586300	36586400	1	13283700	13283800	8	26803100	26803200	2	18534800	18534900	4	9094600	9094700	3	27611800	27611900	2	26265000	26265100	2	14246300	14246400	3	31335200
1	9423100	9423200	1	6107800	6107900	1	16165200	16165300	1	15275600	15275700	1	16814000	16814100	1	10278400	10278500	3	4055000	4055100	1	9910900	9911000	1	36586500	36586600	1	13283800	13283900	8	26895700	26895800	2	18637400	18637500	4	9094700	9094800	3	27611900	27612000	2	26579700	26579800	2	14246700	14246800	3	31352100
1	9423300	9423400	1	6109000	6109100	1	16165300	16165400	1	15289600	15289700	1	16814400	16814500	1	10278500	10278600	3	4055100	4055200	1	9921700	9921800	1	36586600	36586700	1	13284200	13284300	8	26935400	26935500	2	18788600	18788700	4	9094900	9095000	3	27612000	27612100	2	26676800	26676900	2	14246800	14246900	3	31729600
1	9423500	9423600	1	6110600	6110700	1	16171700	16171800	1	15305800	15305900	1	16814700	16814800	1	10278600	10278700	3	4057800	4057900	1	9955600	9955700	1	36587200	36587300	1	13284300	13284400	8	26935500	26935600	2	18875500	18875600	4	9095000	9095100	3	27612900	27613000	2	26721200	26721300	2	14247000	14247100	3	31729700
1	9423600	9423700	1	6173500	6173600	1	16227200	16227300	1	15334300	15334400	1	16814800	16814900	1	10278700	10278800	3	4098900	4099000	1	9979100	9979200	1	36587300	36587400	1	13291000	13291100	8	26935600	26935700	2	18875600	18875700	4	9095100	9095200	3	28592200	28592300	2	26750100	26750200	2	14247100	14247200	3	31729800
1	9436200	9436300	1	6190100	6190200	1	16230400	16230500	1	15370300	15370400	1	16814900	16815000	1	10278800	10278900	3	4099000	4099100	1	9979200	9979300	1	36871700	36871800	1	13359100	13359200	8	26936400	26936500	2	18911700	18911800	4	9095200	9095300	3	28679400	28679500	2	27134000	27134100	2	14247200	14247300	3	31729900
1	9436300	9436400	1	6196500	6196600	1	16323500	16323600	1	15370500	15370600	1	16815100	16815200	1	10278900	10279000	3	4135000	4135100	1	9979300	9979400	1	36871800	36871900	1	13359400	13359500	8	26936500	26936600	2	19082700	19082800	4	9095300	9095400	3	28877200	28877300	2	27134100	27134200	2	14247300	14247400	3	31730000
1	9436500	9436600	1	6213300	6213400	1	16324700	16324800	1	15370600	15370700	1	16815200	16815300	1	10279000	10279100	3	4135200	4135300	1	9979400	9979500	1	36909000	36909100	1	13391500	13391600	8	26936600	26936700	2	19154100	19154200	4	9095400	9095500	3	28877300	28877400	2	28309100	28309200	2	14257500	14257600	3	31730100
1	9436600	9436700	1	6216300	6216400	1	16329500	16329600	1	15374000	15374100	1	16815300	16815400	1	10279200	10279300	3	4171400	4171500	1	10046700	10046800	1	36909100	36909200	1	13409000	13409100	8	26936700	26936800	2	19449700	19449800	4	9095500	9095600	3	28878600	28878700	2	28715400	28715500	2	14280800	14280900	3	31811600
1	9436700	9436800	1	6228600	6228700	1	16399700	16399800	1	15374100	15374200	1	16815600	16815700	1	10279300	10279400	3	4242000	4242100	1	10046800	10046900	1	36909600	36909700	1	13409100	13409200	8	26937200	26937300	2	19460600	19460700	4	9095600	9095700	3	29006100	29006200	2	28715500	28715600	2	14284100	14284200	3	31812100
1	9436800	9436900	1	6228700	6228800	1	16403800	16403900	1	15432700	15432800	1	16815700	16815800	1	10279400	10279500	3	4250300	4250400	1	10051400	10051500	1	36909700	36909800	1	13409200	13409300	8	26937800	26937900	2	19477900	19478000	4	9098100	9098200	3	29382300	29382400	2	28715600	28715700	2	14284200	14284300	3	31812200
1	9438000	9438100	1	6237300	6237400	1	16403900	16404000	1	15432800	15432900	1	16815800	16815900	1	10279500	10279600	3	4250400	4250500	1	10078500	10078600	1	36909800	36909900	1	13417700	13417800	8	27242800	27242900	2	19558200	19558300	4	9098200	9098300	3	29382400	29382500	2	28715700	28715800	2	14288600	14288700	3	31813700
1	9438100	9438200	1	6246700	6246800	1	16404400	16404500	1	15432900	15433000	1	16816400	16816500	1	10279600	10279700	3	4529800	4529900	1	10098000	10098100	1	36910400	36910500	1	13431900	13432000	8	27244300	27244400	2	19558300	19558400	4	9098300	9098400	3	29382500	29382600	2	28715800	28715900	2	14292400	14292500	3	31813800
1	9438400	9438500	1	6290900	6291000	1	16407900	16408000	1	15433500	15433600	1	16816500	16816600	1	10279700	10279800	3	4737600	4737700	1	10140600	10140700	1	36910500	36910600	1	13433200	13433300	8	27244400	27244500	2	19586200	19586300	4	9098400	9098500	3	29382600	29382700	2	28715900	28716000	2	14586500	14586600	3	31814300
1	9438500	9438600	1	6291000	6291100	1	16413200	16413300	1	15433900	15434000	1	16816600	16816700	1	10279800	10279900	3	5017200	5017300	1	10187900	10188000	1	36910600	36910700	1	13435500	13435600	8	27481500	27481600	2	19600400	19600500	4	9098500	9098600	3	29935100	29935200	2	28716000	28716100	2	14658200	14658300	3	31815400
1	9438600	9438700	1	6294300	6294400	1	16413300	16413400	1	15434300	15434400	1	16816900	16817000	1	10283800	10283900	3	5027700	5027800	1	10188000	10188100	1	36910800	36910900	1	13477800	13477900	8	27883500	27883600	2	19697500	19697600	4	9098600	9098700	3	30392800	30392900	2	28716100	28716200	2	14668400	14668500	3	31815500
1	9438700	9438800	1	6302000	6302100	1	16413500	16413600	1	15434500	15434600	1	16817400	16817500	1	10303300	10303400	3	5301500	5301600	1	10188100	10188200	1	36911600	36911700	1	13478000	13478100	8	27883600	27883700	2	19813600	19813700	4	9098700	9098800	3	30515100	30515200	2	28716600	28716700	2	14745100	14745200	3	31816100
1	9438800	9438900	1	6302300	6302400	1	16445800	16445900	1	15434600	15434700	1	16817600	16817700	1	10304700	10304800	3	5360900	5361000	1	10190300	10190400	1	36917300	36917400	1	13550000	13550100	8	28186600	28186700	2	19964300	19964400	4	9098800	9098900	3	31179800	31179900	2	28717700	28717800	2	14745200	14745300	3	31818200
1	9439000	9439100	1	6302900	6303000	1	16454200	16454300	1	15434800	15434900	1	16817700	16817800	1	10320400	10320500	3	5504300	5504400	1	10219800	10219900	1	37171600	37171700	1	13567400	13567500	9	17100	17200	2	20027500	20027600	4	9098900	9099000	3	31179900	31180000	2	28718000	28718100	2	14805200	14805300	3	31850400
1	9439100	9439200	1	6304000	6304100	1	16577100	16577200	1	15435100	15435200	1	16818200	16818300	1	10320500	10320600	3	5504400	5504500	1	10226000	10226100	1	37481500	37481600	1	13567500	13567600	9	32800	32900	2	20160100	20160200	4	9099000	9099100	3	31180000	31180100	2	28718500	28718600	2	14814500	14814600	3	31850500
1	9439200	9439300	1	6310600	6310700	1	16577200	16577300	1	15526900	15527000	1	16818600	16818700	1	10320600	10320700	3	5504500	5504600	1	10260900	10261000	1	37600400	37600500	1	13636000	13636100	9	477500	477600	2	20162000	20162100	4	9099100	9099200	3	31180100	31180200	2	28718800	28718900	2	14814600	14814700	3	32043500
1	9439300	9439400	1	6318200	6318300	1	16577300	16577400	1	15590200	15590300	1	16818800	16818900	1	10381700	10381800	3	5504600	5504700	1	10261400	10261500	1	37607600	37607700	1	13678200	13678300	9	694800	694900	2	20309500	20309600	4	9099200	9099300	3	31180200	31180300	2	28718900	28719000	2	14913900	14914000	3	32043600
1	9439400	9439500	1	6356000	6356100	1	16579100	16579200	1	15590900	15591000	1	16818900	16819000	1	10452200	10452300	3	5508000	5508100	1	10290400	10290500	1	37640400	37640500	1	13684900	13685000	9	832000	832100	2	20378700	20378800	4	9099300	9099400	3	31180700	31180800	2	28719100	28719200	2	14914500	14914600	3	32092000
1	9439500	9439600	1	6381100	6381200	1	16580300	16580400	1	15611000	15611100	1	16819100	16819200	1	10452500	10452600	3	5508100	5508200	1	10303300	10303400	1	38100400	38100500	1	13732000	13732100	9	1767600	1767700	2	20482500	20482600	4	9099400	9099500	3	31181600	31181700	2	28719300	28719400	2	14914600	14914700	3	32092100
1	9439600	9439700	1	6408000	6408100	1	16596200	16596300	1	15614700	15614800	1	16819600	16819700	1	10457900	10458000	3	5715500	5715600	1	10320500	10320600	1	38244100	38244200	1	13758700	13758800	9	2095400	2095500	2	20530700	20530800	4	9099500	9099600	3	31181900	31182000	2	28719400	28719500	2	15008000	15008100	3	32126800
1	9439700	9439800	1	6408300	6408400	1	16714900	16715000	1	15614800	15614900	1	16819700	16819800	1	10458300	10458400	3	5715600	5715700	1	10320600	10320700	1	38344700	38344800	1	13759100	13759200	9	2095500	2095600	2	20561400	20561500	4	9099600	9099700	3	31182000	31182100	2	28719600	28719700	2	15008100	15008200	3	32398800
1	9439800	9439900	1	6417200	6417300	1	16715700	16715800	1	15629300	15629400	1	16819800	16819900	1	10482100	10482200	3	6325700	6325800	1	10355000	10355100	1	38452400	38452500	1	13853000	13853100	9	2383500	2383600	2	20561500	20561600	4	9099700	9099800	3	31182100	31182200	2	28719700	28719800	2	15098600	15098700	3	32399200
1	9439900	9440000	1	6420600	6420700	1	16724000	16724100	1	15670700	15670800	1	16820000	16820100	1	10530000	10530100	3	6471400	6471500	1	10358800	10358900	1	38452500	38452600	1	13915500	13915600	9	2383600	2383700	2	20628600	20628700	4	9099800	9099900	3	31182200	31182300	2	28719800	28719900	2	15099000	15099100	3	32399400
1	9440300	9440400	1	6423100	6423200	1	16747300	16747400	1	15916900	15917000	1	16820400	16820500	1	10530100	10530200	3	6471500	6471600	1	10359500	10359600	1	38576600	38576700	1	13920500	13920600	9	4104800	4104900	2	20687800	20687900	4	9099900	9100000	3	31182300	31182400	2	28719900	28720000	2	15099600	15099700	3	32438500
1	9440400	9440500	1	6424000	6424100	1	16747400	16747500	1	15988300	15988400	1	16820900	16821000	1	10544200	10544300	3	6504400	6504500	1	10359600	10359700	1	38669900	38670000	1	13928800	13928900	9	4104900	4105000	2	20875200	20875300	4	9100000	9100100	3	31182800	31182900	2	28720000	28720100	2	15099700	15099800	3	32440400
1	9440500	9440600	1	6432200	6432300	1	16747700	16747800	1	15988400	15988500	1	16821000	16821100	1	10544400	10544500	3	6513600	6513700	1	10367700	10367800	1	38670000	38670100	1	13937500	13937600	9	4219500	4219600	2	20911100	20911200	4	9100100	9100200	3	31184000	31184100	2	28720100	28720200	2	15116100	15116200	3	32789400
1	9440600	9440700	1	6441000	6441100	1	16747800	16747900	1	16041400	16041500	1	16821100	16821200	1	10544500	10544600	3	6513700	6513800	1	10395400	10395500	1	39043200	39043300	1	13951800	13951900	9	4443000	4443100	2	20911200	20911300	4	9100200	9100300	3	31184100	31184200	2	28720200	28720300	2	15127300	15127400	3	32969200
1	9444500	9444600	1	6441100	6441200	1	16747900	16748000	1	16041500	16041600	1	16821400	16821500	1	10544600	10544700	3	6513800	6513900	1	10427700	10427800	1	39043300	39043400	1	13951900	13952000	9	5589100	5589200	2	20929900	20930000	4	9100300	9100400	3	31184200	31184300	2	28720300	28720400	2	15162400	15162500	3	33043700
1	9458400	9458500	1	6441200	6441300	1	16751600	16751700	1	16042200	16042300	1	16821500	16821600	1	10569000	10569100	3	6513900	6514000	1	10428600	10428700	1	39172700	39172800	1	13952000	13952100	9	6078500	6078600	2	20930000	20930100	4	9100400	9100500	3	31184300	31184400	2	28720400	28720500	2	15165800	15165900	3	33043800
1	9548300	9548400	1	6457000	6457100	1	16751800	16751900	1	16043300	16043400	1	16821600	16821700	1	10570300	10570400	3	6532100	6532200	1	10461700	10461800	1	39325800	39325900	1	13952100	13952200	9	6078600	6078700	2	20951000	20951100	4	9100500	9100600	3	31184400	31184500	2	28720500	28720600	2	15260700	15260800	3	33916400
1	9557200	9557300	1	6468600	6468700	1	16752100	16752200	1	16043400	16043500	1	16821700	16821800	1	10570800	10570900	3	6532400	6532500	1	10464200	10464300	1	39326700	39326800	1	13952600	13952700	9	7696900	7697000	2	20951700	20951800	4	9100600	9100700	3	31185800	31185900	2	28720600	28720700	2	15471000	15471100	3	34028500
1	9557500	9557600	1	6477800	6477900	1	16752300	16752400	1	16043500	16043600	1	16822100	16822200	1	10577000	10577100	3	6617400	6617500	1	10487400	10487500	1	39419500	39419600	1	13952700	13952800	9	7855300	7855400	2	20954800	20954900	4	9100700	9100800	3	31186100	31186200	2	28720700	28720800	2	15471200	15471300	3	34176900
1	9560100	9560200	1	6489600	6489700	1	16767300	16767400	1	16043600	16043700	1	16822200	16822300	1	10577200	10577300	3	6617500	6617600	1	10505200	10505300	1	39419700	39419800	1	13953100	13953200	9	8099100	8099200	2	21109600	21109700	4	9100800	9100900	3	31186200	31186300	2	28720900	28721000	2	15510200	15510300	3	34285400
1	9586000	9586100	1	6489700	6489800	1	16772800	16772900	1	16043800	16043900	1	16822600	16822700	1	10579700	10579800	3	6669100	6669200	1	10505300	10505400	1	39419900	39420000	1	13953200	13953300	9	8103000	8103100	2	21330000	21330100	4	9100900	9101000	3	31186300	31186400	2	28721000	28721100	2	15510300	15510400	3	34333200
1	9592000	9592100	1	6500000	6500100	1	16778700	16778800	1	16044000	16044100	1	16822700	16822800	1	10637800	10637900	3	6788800	6788900	1	10528000	10528100	1	39420000	39420100	1	13953300	13953400	9	8174500	8174600	2	21386500	21386600	4	9101100	9101200	3	31186400	31186500	2	28721300	28721400	2	15663400	15663500	3	34333300
1	9592100	9592200	1	6539700	6539800	1	16778900	16779000	1	16044100	16044200	1	16824700	16824800	1	10751900	10752000	3	6788900	6789000	1	10530300	10530400	1	39479600	39479700	1	13953400	13953500	9	8174600	8174700	2	21392300	21392400	4	9101300	9101400	3	31186500	31186600	2	28721400	28721500	2	15757300	15757400	3	34333400
1	9592200	9592300	1	6557600	6557700	1	16779200	16779300	1	16044200	16044300	1	16826000	16826100	1	10798300	10798400	3	6824300	6824400	1	10553400	10553500	1	39511400	39511500	1	13953900	13954000	9	8706600	8706700	2	21422800	21422900	4	9101400	9101500	3	31186900	31187000	2	28721500	28721600	2	15757400	15757500	3	34382400
1	9592300	9592400	1	6557700	6557800	1	16779300	16779400	1	16134300	16134400	1	16826100	16826200	1	10798400	10798500	3	6840800	6840900	1	10568900	10569000	1	39521900	39522000	1	13954000	13954100	9	8706700	8706800	2	21431900	21432000	4	9101500	9101600	3	31187000	31187100	2	28721600	28721700	2	15757500	15757600	3	34489200
1	9593800	9593900	1	6558600	6558700	1	16779400	16779500	1	16159400	16159500	1	16826200	16826300	1	10799000	10799100	3	6923300	6923400	1	10569000	10569100	1	39522000	39522100	1	13954400	13954500	9	9278100	9278200	2	21581700	21581800	4	9101700	9101800	3	31187700	31187800	2	28721700	28721800	2	15757600	15757700	3	34560700
1	9593900	9594000	1	6559800	6559900	1	16779600	16779700	1	16161700	16161800	1	16826600	16826700	1	10882400	10882500	3	7001300	7001400	1	10579600	10579700	1	39772700	39772800	1	13954500	13954600	9	10062200	10062300	2	21584700	21584800	4	9101800	9101900	3	31188200	31188300	2	28721800	28721900	2	15795900	15796000	3	34560800
1	9594000	9594100	1	6561200	6561300	1	16779700	16779800	1	16164300	16164400	1	16826700	16826800	1	10882500	10882600	3	7016300	7016400	1	10602700	10602800	1	39996100	39996200	1	13954600	13954700	9	10344800	10344900	2	21644300	21644400	4	9106000	9106100	3	31188300	31188400	2	28721900	28722000	2	16039000	16039100	3	34562300
1	9594100	9594200	1	6579300	6579400	1	16786700	16786800	1	16165200	16165300	1	16827100	16827200	1	10882600	10882700	3	7123800	7123900	1	10602800	10602900	1	40061200	40061300	1	13954700	13954800	9	10350400	10350500	2	21648400	21648500	4	9109200	9109300	3	31188400	31188500	2	28992100	28992200	2	16295900	16296000	3	34562400
1	9596700	9596800	1	6579400	6579500	1	16786800	16786900	1	16165300	16165400	1	16827400	16827500	1	10916000	10916100	3	7124400	7124500	1	10605800	10605900	1	40092400	40092500	1	13955100	13955200	9	11159000	11159100	2	21719300	21719400	4	9109300	9109400	3	31188500	31188600	2	29074100	29074200	2	16302900	16303000	3	35059300
1	9607500	9607600	1	6596200	6596300	1	16804400	16804500	1	16166100	16166200	1	16827600	16827700	1	10951700	10951800	3	7144300	7144400	1	10605900	10606000	1	40092500	40092600	1	13955200	13955300	9	11769100	11769200	2	21740100	21740200	4	9109400	9109500	3	31188600	31188700	2	29581000	29581100	2	16303000	16303100	3	35284600
1	9631000	9631100	1	6596300	6596400	1	16804600	16804700	1	16166200	16166300	1	16827900	16828000	1	10951800	10951900	3	7144400	7144500	1	10606000	10606100	1	40369900	40370000	1	13955300	13955400	9	11945600	11945700	2	21939100	21939200	4	9109500	9109600	3	31189100	31189200	2	29582300	29582400	2	16305000	16305100	3	35334700
1	9713200	9713300	1	6598900	6599000	1	16804900	16805000	1	16167500	16167600	1	16828000	16828100	1	10952100	10952200	3	7357700	7357800	1	10606100	10606200	1	40382000	40382100	1	13955700	13955800	9	12078000	12078100	2	22042700	22042800	4	9109600	9109700	3	31189400	31189500	2	29669600	29669700	2	16438700	16438800	3	35334800
1	9716800	9716900	1	6599000	6599100	1	16805100	16805200	1	16264600	16264700	1	16828200	16828300	1	10956300	10956400	3	7491100	7491200	1	10606200	10606300	1	40382400	40382500	1	13955800	13955900	9	12579200	12579300	2	22214000	22214100	4	9109700	9109800	3	31204600	31204700	2	29671900	29672000	2	16541600	16541700	3	35428500
1	9716900	9717000	1	6599200	6599300	1	16808800	16808900	1	16267400	16267500	1	16828300	16828400	1	10957200	10957300	3	7491200	7491300	1	10621400	10621500	1	40382600	40382700	1	13955900	13956000	9	12771400	12771500	2	22220100	22220200	4	9109800	9109900	3	31352100	31352200	2	30224500	30224600	2	16589500	16589600	3	35480300
1	9717000	9717100	1	6602000	6602100	1	16810300	16810400	1	16267500	16267600	1	16828800	16828900	1	10957300	10957400	3	7617500	7617600	1	10621500	10621600	1	40796200	40796300	1	13956000	13956100	9	13170700	13170800	2	22220200	22220300	4	9109900	9110000	3	31811400	31811500	2	30313300	30313400	2	17050300	17050400	3	35603400
1	9718400	9718500	1	6602600	6602700	1	16810500	16810600	1	16267800	16267900	1	16829200	16829300	1	10957600	10957700	3	7974500	7974600	1	10707200	10707300	1	41046700	41046800	1	13956500	13956600	9	13633800	13633900	2	22240400	22240500	4	9110000	9110100	3	31811500	31811600	2	31488500	31488600	2	17055600	17055700	3	35774800
1	9722500	9722600	1	6604800	6604900	1	16813200	16813300	1	16341600	16341700	1	16829700	16829800	1	11041400	11041500	3	7974600	7974700	1	10811500	10811600	1	41141700	41141800	1	13956600	13956700	9	14156100	14156200	2	22458800	22458900	4	9113300	9113400	3	31811700	31811800	2	31488600	31488700	2	17178500	17178600	4	260800
1	9730000	9730100	1	6604900	6605000	1	16813300	16813400	1	16387700	16387800	1	16829900	16830000	1	11047900	11048000	3	7974700	7974800	1	10834500	10834600	1	41148700	41148800	1	13976200	13976300	9	14804900	14805000	2	22463000	22463100	4	9114500	9114600	3	31811800	31811900	2	31813000	31813100	2	17178600	17178700	4	1017000
1	9731300	9731400	1	6611900	6612000	1	16813500	16813600	1	16399700	16399800	1	16830000	16830100	1	11048000	11048100	3	8098400	8098500	1	10841400	10841500	1	41179000	41179100	1	13989600	13989700	9	14805000	14805100	2	22549100	22549200	4	9114600	9114700	3	31811900	31812000	2	32077800	32077900	2	17178700	17178800	4	1914200
1	9762000	9762100	1	6612000	6612100	1	16813600	16813700	1	16400200	16400300	1	16830100	16830200	1	11048100	11048200	3	8098600	8098700	1	10915900	10916000	1	41354800	41354900	1	13990000	13990100	9	15776700	15776800	2	22549800	22549900	4	9115400	9115500	3	31812000	31812100	2	32206500	32206600	2	17179800	17179900	4	2085800
1	9774000	9774100	1	6619500	6619600	1	16813700	16813800	1	16400300	16400400	1	16830500	16830600	1	11048700	11048800	3	8183800	8183900	1	10916000	10916100	1	41354900	41355000	1	13990100	13990200	9	15858100	15858200	2	22646300	22646400	4	9116000	9116100	3	31812100	31812200	2	32252400	32252500	2	17180900	17181000	4	2085900
1	9774100	9774200	1	6634300	6634400	1	16814800	16814900	1	16403800	16403900	1	16831900	16832000	1	11082800	11082900	3	8183900	8184000	1	10916100	10916200	1	41378900	41379000	1	14057300	14057400	9	16223100	16223200	2	22846700	22846800	4	9118600	9118700	3	31812200	31812300	2	32252500	32252600	2	17181000	17181100	4	4407000
1	9778300	9778400	1	6722000	6722100	1	16815100	16815200	1	16403900	16404000	1	16835700	16835800	1	11088100	11088200	3	8227400	8227500	1	10916200	10916300	1	41379000	41379100	1	14213900	14214000	9	16223200	16223300	2	22910600	22910700	4	9121200	9121300	3	31812300	31812400	2	32435000	32435100	2	17217600	17217700	4	4923400
1	9822700	9822800	1	6723200	6723300	1	16815300	16815400	1	16410800	16410900	1	16849800	16849900	1	11099100	11099200	3	8346300	8346400	1	10933700	10933800	1	41943700	41943800	1	14229100	14229200	9	16519600	16519700	2	22916200	22916300	4	9121300	9121400	3	31812400	31812500	2	32694300	32694400	2	17595600	17595700	4	4923500
1	9822800	9822900	1	6723300	6723400	1	16815600	16815700	1	16413200	16413300	1	16849900	16850000	1	11099200	11099300	3	8497000	8497100	1	10937400	10937500	1	41992200	41992300	1	14234800	14234900	9	16525100	16525200	2	22966600	22966700	4	9121800	9121900	3	31812500	31812600	2	32694400	32694500	2	17648700	17648800	4	5244000
1	9852800	9852900	1	6731800	6731900	1	16815700	16815800	1	16413300	16413400	1	16851600	16851700	1	11099500	11099600	3	8508700	8508800	1	10937500	10937600	1	41996600	41996700	1	14275700	14275800	9	16525200	16525300	2	23008500	23008600	4	9123500	9123600	3	31812600	31812700	2	33050300	33050400	2	17824800	17824900	4	5288600
1	9853000	9853100	1	6731900	6732000	1	16815800	16815900	1	16413500	16413600	1	16857700	16857800	1	11099600	11099700	3	8508800	8508900	1	10951300	10951400	1	42045200	42045300	1	14282500	14282600	9	16639600	16639700	2	23076100	23076200	4	9125200	9125300	3	31812700	31812800	2	33134800	33134900	2	18431700	18431800	4	5691500
1	9873000	9873100	1	6737800	6737900	1	16818800	16818900	1	16448500	16448600	1	16857800	16857900	1	11099700	11099800	3	8577900	8578000	1	10951400	10951500	1	42345100	42345200	1	14333600	14333700	9	16698100	16698200	2	23171400	23171500	4	9125300	9125400	3	31812800	31812900	2	33134900	33135000	2	18431800	18431900	4	8026200
1	9873100	9873200	1	6752700	6752800	1	16821000	16821100	1	16448600	16448700	1	16858700	16858800	1	11099800	11099900	3	8639000	8639100	1	10956800	10956900	1	42366500	42366600	1	14333800	14333900	9	16698200	16698300	2	23318600	23318700	4	9127100	9127200	3	31812900	31813000	2	33200000	33200100	2	18562800	18562900	4	8213800
1	9899500	9899600	1	6766000	6766100	1	16827600	16827700	1	16458500	16458600	1	16858800	16858900	1	11099900	11100000	3	8689900	8690000	1	10959000	10959100	1	42460000	42460100	1	14334100	14334200	9	17122000	17122100	2	23377100	23377200	4	9128300	9128400	3	31813000	31813100	2	33622900	33623000	2	18956200	18956300	4	8213900
1	9904500	9904600	1	6766200	6766300	1	16829200	16829300	1	16545200	16545300	1	16859700	16859800	1	11100200	11100300	3	8690100	8690200	1	10984600	10984700	1	43055100	43055200	1	14334200	14334300	9	17405000	17405100	2	23444800	23444900	4	9133800	9133900	3	31813100	31813200	2	34010300	34010400	2	19044900	19045000	4	8251300
1	9904700	9904800	1	6780400	6780500	1	16910500	16910600	1	16574800	16574900	1	16860400	16860500	1	11100300	11100400	3	8825000	8825100	1	10985600	10985700	1	43148000	43148100	1	14334300	14334400	9	17541800	17541900	2	23503100	23503200	4	9135000	9135100	3	31813200	31813300	2	34010400	34010500	2	19045100	19045200	4	9094400
1	9944400	9944500	1	6780500	6780600	1	16911100	16911200	1	16575300	16575400	1	16879400	16879500	1	11100500	11100600	3	8994400	8994500	1	10985700	10985800	2	109500	109600	1	14334400	14334500	9	17711700	17711800	2	23503400	23503500	4	9135100	9135200	3	31813300	31813400	2	34012000	34012100	2	19344900	19345000	4	9094500
1	9944600	9944700	1	6819200	6819300	1	16911200	16911300	1	16576500	16576600	1	16880000	16880100	1	11100700	11100800	3	8996500	8996600	1	11041400	11041500	2	409900	410000	1	14334500	14334600	9	18057500	18057600	2	23513700	23513800	4	9136100	9136200	3	31813400	31813500	2	34014500	34014600	2	19345000	19345100	4	9095000
1	9953500	9953600	1	6819600	6819700	1	16911900	16912000	1	16579100	16579200	1	16880100	16880200	1	11100800	11100900	3	8996600	8996700	1	11048600	11048700	2	618000	618100	1	14334600	14334700	9	18082100	18082200	2	23513800	23513900	4	9136200	9136300	3	31813500	31813600	2	34014600	34014700	2	19401400	19401500	4	9095300
1	9979100	9979200	1	6819700	6819800	1	16912400	16912500	1	16598600	16598700	1	16900600	16900700	1	11101100	11101200	3	9166400	9166500	1	11048700	11048800	2	657900	658000	1	14334700	14334800	9	18999200	18999300	2	23533500	23533600	4	9136300	9136400	3	31813600	31813700	2	34015600	34015700	2	19401500	19401600	4	9098000
1	9979300	9979400	1	6821800	6821900	1	16912700	16912800	1	16600900	16601000	1	16910400	16910500	1	11101200	11101300	3	9196400	9196500	1	11056500	11056600	2	662600	662700	1	14334800	14334900	9	19659200	19659300	2	23595200	23595300	4	9136400	9136500	3	31813700	31813800	2	34015700	34015800	2	19414500	19414600	4	9098500
1	9979400	9979500	1	6833800	6833900	1	16912900	16913000	1	16603400	16603500	1	16910500	16910600	1	11105500	11105600	3	9211400	9211500	1	11056600	11056700	2	662700	662800	1	14334900	14335000	9	20743200	20743300	2	23724000	23724100	4	9136500	9136600	3	31813800	31813900	2	34193400	34193500	2	19415500	19415600	4	9100000
1	9981800	9981900	1	6847600	6847700	1	16913200	16913300	1	16606300	16606400	1	16910600	16910700	1	11105800	11105900	3	9211600	9211700	1	11057300	11057400	2	779600	779700	1	14335000	14335100	9	20882400	20882500	2	23947800	23947900	4	9136600	9136700	3	31813900	31814000	2	34287800	34287900	2	19415600	19415700	4	9100100
1	9985800	9985900	1	6851400	6851500	1	16913300	16913400	1	16655300	16655400	1	16910700	16910800	1	11105900	11106000	3	9240000	9240100	1	11070700	11070800	2	902400	902500	1	14335100	14335200	9	21170100	21170200	2	24031100	24031200	4	9136800	9136900	3	31814000	31814100	2	34745400	34745500	2	19557900	19558000	4	9100200
1	9996700	9996800	1	6865300	6865400	1	16913400	16913500	1	16656300	16656400	1	16910900	16911000	1	11107800	11107900	3	9240100	9240200	1	11082800	11082900	2	902500	902600	1	14335200	14335300	9	21171400	21171500	2	24076000	24076100	4	9136900	9137000	3	31814100	31814200	2	34760000	34760100	2	19848900	19849000	4	9100600
1	9998500	9998600	1	6883000	6883100	1	16914000	16914100	1	16659300	16659400	1	16911100	16911200	1	11107900	11108000	3	9240200	9240300	1	11082900	11083000	2	956000	956100	1	14335300	14335400	9	21171500	21171600	2	24124800	24124900	4	9137000	9137100	3	31814200	31814300	2	34760100	34760200	2	19849000	19849100	4	9100700
1	9998600	9998700	1	6942000	6942100	1	16914100	16914200	1	16705000	16705100	1	16911200	16911300	1	11109000	11109100	3	9240300	9240400	1	11088100	11088200	2	1105400	1105500	1	14335400	14335500	9	21859700	21859800	2	24137100	24137200	4	9137100	9137200	3	31814300	31814400	2	35271300	35271400	2	19851300	19851400	4	9101300
1	9999400	9999500	1	6947600	6947700	1	16914200	16914300	1	16714900	16715000	1	16911300	16911400	1	11109100	11109200	3	9240400	9240500	1	11088200	11088300	2	1116500	1116600	1	14335500	14335600	9	22129000	22129100	2	24151500	24151600	4	9137700	9137800	3	31814400	31814500	2	35273000	35273100	2	19854900	19855000	4	9109200
1	10000700	10000800	1	6947800	6947900	1	16915100	16915200	1	16760300	16760400	1	16911900	16912000	1	11142300	11142400	3	9410600	9410700	1	11132600	11132700	2	1138400	1138500	1	14335600	14335700	9	22396300	22396400	2	24220700	24220800	4	9137800	9137900	3	31814500	31814600	2	35273600	35273700	2	20015400	20015500	4	9114500
1	10031500	10031600	1	6947900	6948000	1	16915200	16915300	1	16767100	16767200	1	16912000	16912100	1	11142500	11142600	3	9427100	9427200	1	11156300	11156400	2	1161800	1161900	1	14335800	14335900	9	22732200	22732300	2	24386900	24387000	4	9142900	9143000	3	31814600	31814700	3	1220000	1220100	2	20015500	20015600	4	9114600
1	10032600	10032700	1	6949200	6949300	1	16918300	16918400	1	16972000	16972100	1	16912400	16912500	1	11159100	11159200	3	9427200	9427300	1	11214000	11214100	2	1189200	1189300	1	14335900	14336000	10	433900	434000	2	24678500	24678600	4	9143100	9143200	3	31814700	31814800	3	1444300	1444400	2	20015700	20015800	4	9118500
1	10032700	10032800	1	6949500	6949600	1	16942600	16942700	1	16974200	16974300	1	16912600	16912700	1	11159300	11159400	3	9427300	9427400	1	11223900	11224000	2	1293900	1294000	1	14336000	14336100	10	1122600	1122700	2	24689000	24689100	4	9143200	9143300	3	31814800	31814900	3	1667300	1667400	2	20015800	20015900	4	9120100
1	10033300	10033400	1	6954900	6955000	1	16942900	16943000	1	17019200	17019300	1	16912700	16912800	1	11181200	11181300	3	9435700	9435800	1	11225200	11225300	2	1295200	1295300	1	14336100	14336200	10	1221700	1221800	2	24752700	24752800	4	9143300	9143400	3	31815000	31815100	3	1667400	1667500	2	20015900	20016000	4	9135000
1	10033400	10033500	1	6955600	6955700	1	16943000	16943100	1	17143600	17143700	1	16912800	16912900	1	11181300	11181400	3	9513600	9513700	1	11225300	11225400	2	1371700	1371800	1	14336200	14336300	10	1221800	1221900	2	24871500	24871600	4	9143400	9143500	3	31815100	31815200	3	1691700	1691800	2	20016600	20016700	4	9135100
1	10033500	10033600	1	6955700	6955800	1	16943600	16943700	1	17184900	17185000	1	16912900	16913000	1	11181400	11181500	3	9513700	9513800	1	11252300	11252400	2	1371900	1372000	1	14336400	14336500	10	1416800	1416900	2	24960900	24961000	4	9143500	9143600	3	31815200	31815300	3	1715800	1715900	2	20210200	20210300	4	9136100
1	10036600	10036700	1	6965900	6966000	1	16944000	16944100	1	17187700	17187800	1	16913100	16913200	1	11185500	11185600	3	9568700	9568800	1	11272000	11272100	2	1372000	1372100	1	14336500	14336600	10	1586900	1587000	2	25258300	25258400	4	9147100	9147200	3	31815300	31815400	3	1741700	1741800	2	20210300	20210400	4	9137200
1	10047700	10047800	1	6966000	6966100	1	16944100	16944200	1	17188300	17188400	1	16913200	16913300	1	11194900	11195000	3	9568800	9568900	1	11299600	11299700	2	1372100	1372200	1	14336600	14336700	10	1587000	1587100	2	25306700	25306800	4	9147200	9147300	3	31815400	31815500	3	1807100	1807200	2	20211500	20211600	4	9137600
1	10051200	10051300	1	6977000	6977100	1	16944500	16944600	1	17188800	17188900	1	16913300	16913400	1	11292200	11292300	3	9568900	9569000	1	11348700	11348800	2	1372200	1372300	1	14336700	14336800	10	2598200	2598300	2	25317100	25317200	4	9153700	9153800	3	31815500	31815600	3	1809700	1809800	2	20358400	20358500	4	9137700
1	10109900	10110000	1	6977100	6977200	1	16944800	16944900	1	17237400	17237500	1	16913400	16913500	1	11294200	11294300	3	9569000	9569100	1	11349600	11349700	2	1372300	1372400	1	14336800	14336900	10	2821100	2821200	2	25321600	25321700	4	9160600	9160700	3	31815600	31815700	3	1824700	1824800	2	20655500	20655600	4	9137800
1	10112300	10112400	1	6977200	6977300	1	16944900	16945000	1	17237500	17237600	1	16913500	16913600	1	11297100	11297200	3	9713900	9714000	1	11349800	11349900	2	1372400	1372500	1	14336900	14337000	10	4018400	4018500	2	25325500	25325600	4	9160800	9160900	3	31815700	31815800	3	1892300	1892400	2	20655600	20655700	4	9139700
1	10125300	10125400	1	6978500	6978600	1	16945200	16945300	1	17237700	17237800	1	16913700	16913800	1	11297300	11297400	3	9911400	9911500	1	11353800	11353900	2	1372500	1372600	1	14337000	14337100	10	4320700	4320800	2	25353000	25353100	4	9160900	9161000	3	31815800	31815900	3	1911000	1911100	2	20770300	20770400	4	9143200
1	10125400	10125500	1	6978700	6978800	1	16946100	16946200	1	17237900	17238000	1	16913800	16913900	1	11297400	11297500	3	9911500	9911600	1	11353900	11354000	2	1558100	1558200	1	14337200	14337300	10	4320800	4320900	2	25353100	25353200	4	9161900	9162000	3	31815900	31816000	3	1911100	1911200	2	21024200	21024300	4	9143400
1	10126300	10126400	1	6981900	6982000	1	16949400	16949500	1	17238200	17238300	1	16913900	16914000	1	11300800	11300900	3	10118200	10118300	1	11438000	11438100	2	1589300	1589400	1	14337300	14337400	10	4763700	4763800	2	25372400	25372500	4	9162100	9162200	3	31816100	31816200	3	1912700	1912800	2	21024300	21024400	4	9143500
1	10126400	10126500	1	6988200	6988300	1	17013600	17013700	1	17238300	17238400	1	16914000	16914100	1	11300900	11301000	3	10203200	10203300	1	11449300	11449400	2	1672500	1672600	1	14337400	14337500	10	4833900	4834000	2	25439500	25439600	4	9163600	9163700	3	31816200	31816300	3	1915300	1915400	2	21024500	21024600	4	9151800
1	10140900	10141000	1	6994300	6994400	1	17139400	17139500	1	17238400	17238500	1	16914100	16914200	1	11301000	11301100	3	10203300	10203400	1	11450300	11450400	2	1677800	1677900	1	14337500	14337600	10	5559200	5559300	2	25476300	25476400	4	9163700	9163800	3	31816500	31816600	3	1916300	1916400	2	21043000	21043100	4	9153700
1	10150800	10150900	1	7005300	7005400	1	17139500	17139600	1	17238500	17238600	1	16914200	16914300	1	11301900	11302000	3	10216300	10216400	1	11450400	11450500	2	1678000	1678100	1	14337600	14337700	10	8405000	8405100	2	25476400	25476500	4	9166900	9167000	3	31816800	31816900	3	1916400	1916500	2	21447500	21447600	4	9153800
1	10154000	10154100	1	7005400	7005500	1	17163200	17163300	1	17238700	17238800	1	16917100	16917200	1	11302100	11302200	3	10279600	10279700	1	11460800	11460900	2	1679400	1679500	1	14337700	14337800	10	9173000	9173100	2	25502000	25502100	4	9167200	9167300	3	31816900	31817000	3	2143500	2143600	2	21725200	21725300	4	9160600
1	10187900	10188000	1	7057300	7057400	1	17169100	17169200	1	17238800	17238900	1	16917200	16917300	1	11304800	11304900	3	10594700	10594800	1	11469500	11469600	2	1753800	1753900	1	14337800	14337900	10	9899200	9899300	2	25502100	25502200	4	9170600	9170700	3	31818100	31818200	3	2144700	2144800	2	21725800	21725900	4	9160700
1	10188000	10188100	1	7070700	7070800	1	17188700	17188800	1	17300000	17300100	1	16920400	16920500	1	11325000	11325100	3	10710800	10710900	1	11469600	11469700	2	1890500	1890600	1	14337900	14338000	10	10223800	10223900	2	25549700	25549800	4	9170700	9170800	3	31818500	31818600	3	2144800	2144900	2	21726700	21726800	4	9160900
1	10197500	10197600	1	7077300	7077400	1	17189100	17189200	1	17324200	17324300	1	16921400	16921500	1	11325100	11325200	3	10710900	10711000	1	11478900	11479000	2	1890600	1890700	1	14338000	14338100	10	10223900	10224000	2	25549800	25549900	4	9170800	9170900	3	31819200	31819300	3	2606600	2606700	2	22463200	22463300	4	9170800
1	10231800	10231900	1	7077400	7077500	1	17229900	17230000	1	17329800	17329900	1	16922400	16922500	1	11325200	11325300	3	10781900	10782000	1	11490300	11490400	2	1890700	1890800	1	14338100	14338200	10	10813800	10813900	2	25591400	25591500	4	9170900	9171000	3	31819300	31819400	3	2789900	2790000	2	22536400	22536500	4	9170900
1	10231900	10232000	1	7077500	7077600	1	17329800	17329900	1	17329900	17330000	1	16922800	16922900	1	11326800	11326900	3	10782000	10782100	1	11490400	11490500	2	1890900	1891000	1	14338200	14338300	10	10823400	10823500	2	25796100	25796200	4	9171000	9171100	3	31850400	31850500	3	2941400	2941500	2	22564100	22564200	4	9171400
1	10234400	10234500	1	7078700	7078800	1	17329900	17330000	1	17436200	17436300	1	16942000	16942100	1	11326900	11327000	3	10792200	10792300	1	11491300	11491400	2	1891100	1891200	1	14338400	14338500	10	10853600	10853700	2	25796200	25796300	4	9171100	9171200	3	31850500	31850600	3	2941500	2941600	2	22564200	22564300	4	9179000
1	10306600	10306700	1	7078800	7078900	1	17375200	17375300	1	17436300	17436400	1	16942100	16942200	1	11327000	11327100	3	10908600	10908700	1	11491400	11491500	2	1891400	1891500	1	14338500	14338600	10	10905300	10905400	2	25850800	25850900	4	9171300	9171400	3	32043500	32043600	3	2957400	2957500	2	22730200	22730300	4	9184800
1	10306700	10306800	1	7078900	7079000	1	17498900	17499000	1	17438100	17438200	1	16942400	16942500	1	11327200	11327300	3	11065000	11065100	1	11494300	11494400	2	1891700	1891800	1	14338700	14338800	10	11794800	11794900	2	25865800	25865900	4	9171400	9171500	3	32043600	32043700	3	3124600	3124700	2	22888500	22888600	4	9196900
1	10309400	10309500	1	7079400	7079500	1	17501000	17501100	1	17441700	17441800	1	16942600	16942700	1	11332600	11332700	3	11068000	11068100	1	11509800	11509900	2	1891800	1891900	1	14338800	14338900	10	12121400	12121500	2	26043500	26043600	4	9171500	9171600	3	32399000	32399100	3	3133800	3133900	2	22898200	22898300	4	9200300
1	10320400	10320500	1	7079500	7079600	1	17543700	17543800	1	17441800	17441900	1	16942700	16942800	1	11332700	11332800	3	11068100	11068200	1	11509900	11510000	2	1892500	1892600	1	14338900	14339000	10	12301300	12301400	2	26052600	26052700	4	9171600	9171700	3	32410400	32410500	3	3572300	3572400	2	22898300	22898400	4	9202700
1	10320500	10320600	1	7079600	7079700	1	17580500	17580600	1	17461100	17461200	1	16942900	16943000	1	11332800	11332900	3	11399800	11399900	1	11510200	11510300	2	1892800	1892900	1	14339000	14339100	10	13186800	13186900	2	26117200	26117300	4	9171700	9171800	3	32410500	32410600	3	3677200	3677300	2	22898400	22898500	4	9202900
1	10320700	10320800	1	7090200	7090300	1	17633900	17634000	1	17481800	17481900	1	16943000	16943100	1	11333000	11333100	3	11400300	11400400	1	11510300	11510400	2	1973600	1973700	1	14339100	14339200	10	13461200	13461300	2	26153200	26153300	4	9171800	9171900	3	32438400	32438500	3	4684000	4684100	2	22898500	22898600	4	9203300
1	10356500	10356600	1	7138200	7138300	1	17678500	17678600	1	17498900	17499000	1	16943100	16943200	1	11333100	11333200	3	11435700	11435800	1	11521900	11522000	2	2016400	2016500	1	14339200	14339300	10	13640400	13640500	2	26168100	26168200	4	9171900	9172000	3	32438500	32438600	3	4737100	4737200	2	22898600	22898700	4	9203400
1	10356800	10356900	1	7141100	7141200	1	17700500	17700600	1	17543000	17543100	1	16943500	16943600	1	11333300	11333400	3	11482600	11482700	1	11522000	11522100	2	2069700	2069800	1	14339300	14339400	10	13640500	13640600	2	26231900	26232000	4	9172000	9172100	3	32439400	32439500	3	4766400	4766500	2	22898700	22898800	4	9206200
1	10359600	10359700	1	7144400	7144500	1	17700600	17700700	1	17543100	17543200	1	16943600	16943700	1	11333500	11333600	3	11486100	11486200	1	11524900	11525000	2	2375700	2375800	1	14339400	14339500	10	14086100	14086200	2	26232000	26232100	4	9173100	9173200	3	32440300	32440400	3	5159400	5159500	2	22898800	22898900	4	9206300
1	10367700	10367800	1	7146500	7146600	1	17700900	17701000	1	17551100	17551200	1	16943700	16943800	1	11333600	11333700	3	11954500	11954600	1	11535900	11536000	2	2444100	2444200	1	14339500	14339600	10	14095500	14095600	2	26504200	26504300	4	9174100	9174200	3	32440400	32440500	3	5159500	5159600	2	23192700	23192800	4	9206800
1	10374700	10374800	1	7147200	7147300	1	17701000	17701100	1	17633900	17634000	1	16943900	16944000	1	11333700	11333800	3	11961300	11961400	1	11545900	11546000	2	2604100	2604200	1	14339600	14339700	10	14483300	14483400	2	26691100	26691200	4	9174200	9174300	3	32969200	32969300	3	5159800	5159900	2	23250100	23250200	4	9208300
1	10401500	10401600	1	7187500	7187600	1	17701100	17701200	1	17700500	17700600	1	16944000	16944100	1	11333800	11333900	3	12409100	12409200	1	11557300	11557400	2	2861900	2862000	1	14362900	14363000	10	14606200	14606300	2	26703400	26703500	4	9175300	9175400	3	33572200	33572300	3	5234000	5234100	2	23250800	23250900	4	9208500
1	10427700	10427800	1	7187600	7187700	1	17701300	17701400	1	17701700	17701800	1	16944100	16944200	1	11333900	11334000	3	12450400	12450500	1	11557700	11557800	2	2869300	2869400	1	14399300	14399400	10	14606300	14606400	2	26703500	26703600	4	9175400	9175500	3	34028500	34028600	3	5234100	5234200	2	23307800	23307900	4	9208900
1	10451500	10451600	1	7187700	7187800	1	17701500	17701600	1	17730000	17730100	1	16944400	16944500	1	11334000	11334100	3	12450500	12450600	1	11557800	11557900	2	2884100	2884200	1	14455700	14455800	10	14643500	14643600	2	26763900	26764000	4	9175900	9176000	3	34176800	34176900	3	5234200	5234300	2	23350300	23350400	4	9209000
1	10463000	10463100	1	7187800	7187900	1	17701700	17701800	1	17732600	17732700	1	16944500	16944600	1	11334100	11334200	3	12735700	12735800	1	11569700	11569800	2	2886700	2886800	1	14455800	14455900	10	14664000	14664100	2	26791400	26791500	4	9176300	9176400	3	34333200	34333300	3	5234300	5234400	2	23350600	23350700	4	9209600
1	10463100	10463200	1	7199900	7200000	1	17701900	17702000	1	17758200	17758300	1	16944600	16944700	1	11334200	11334300	3	12735800	12735900	1	11569800	11569900	2	2894400	2894500	1	14478900	14479000	10	14707700	14707800	2	26791800	26791900	4	9176400	9176500	3	34333300	34333400	3	5234400	5234500	2	23352200	23352300	4	9698200
1	10511700	10511800	1	7218700	7218800	1	17702300	17702400	1	17765100	17765200	1	16944800	16944900	1	11334300	11334400	3	12735900	12736000	1	11581000	11581100	2	2895200	2895300	1	14479000	14479100	10	15308600	15308700	2	26794400	26794500	4	9176600	9176700	3	34333400	34333500	3	5234500	5234600	2	23355200	23355300	4	11572000
1	10534800	10534900	1	7218800	7218900	1	17702400	17702500	1	17765200	17765300	1	16944900	16945000	1	11334500	11334600	3	12736000	12736100	1	11597700	11597800	2	2895400	2895500	1	14479100	14479200	10	16315700	16315800	2	26817200	26817300	4	9176900	9177000	3	34350000	34350100	3	5235300	5235400	2	23355300	23355400	4	11739000
1	10553400	10553500	1	7219500	7219600	1	17703500	17703600	1	17802300	17802400	1	16945200	16945300	1	11334600	11334700	3	12739000	12739100	1	11599100	11599200	2	2896000	2896100	1	14479200	14479300	10	16371600	16371700	2	26986100	26986200	4	9178000	9178100	3	34382400	34382500	3	5235400	5235500	2	23671700	23671800	4	11739100
1	10569000	10569100	1	7237400	7237500	1	17703600	17703700	1	17802400	17802500	1	16945500	16945600	1	11334700	11334800	3	12893500	12893600	1	11616900	11617000	2	2896200	2896300	1	14490100	14490200	10	16371700	16371800	2	27163900	27164000	4	9178900	9179000	3	34489100	34489200	3	5235500	5235600	2	23671800	23671900	4	12325800
1	10592300	10592400	1	7237500	7237600	1	17704000	17704100	1	17807900	17808000	1	16945600	16945700	1	11348700	11348800	3	13042400	13042500	1	11623700	11623800	2	2896300	2896400	1	14512200	14512300	10	16377000	16377100	2	27444300	27444400	4	9179000	9179100	3	34489200	34489300	3	5235600	5235700	2	23671900	23672000	4	12325900
1	10596300	10596400	1	7244900	7245000	1	17704100	17704200	1	17808000	17808100	1	16946100	16946200	1	11349700	11349800	3	13938600	13938700	1	11629800	11629900	2	2896400	2896500	1	14516500	14516600	10	16377100	16377200	2	27522700	27522800	4	9179800	9179900	3	34560700	34560800	3	5235700	5235800	2	23768600	23768700	4	13994400
1	10597400	10597500	1	7246100	7246200	1	17704200	17704300	1	17820300	17820400	1	16946200	16946300	1	11385200	11385300	3	13938800	13938900	1	11637600	11637700	2	2896900	2897000	1	14516600	14516700	10	17085900	17086000	2	27593900	27594000	4	9180300	9180400	3	34560800	34560900	3	5828100	5828200	2	23804100	23804200	4	14903200
1	10621400	10621500	1	7257600	7257700	1	17704300	17704400	1	17824400	17824500	1	16946300	16946400	1	11385700	11385800	3	13992500	13992600	1	11638800	11638900	2	2964300	2964400	1	14534500	14534600	10	17172800	17172900	2	27674800	27674900	4	9180400	9180500	3	34562300	34562400	3	5828200	5828300	2	24109500	24109600	4	15295900
1	10621500	10621600	1	7257700	7257800	1	17734100	17734200	1	17828300	17828400	1	16946500	16946600	1	11397300	11397400	3	13992600	13992700	1	11638900	11639000	2	3033900	3034000	1	14535400	14535500	10	17172900	17173000	2	27730900	27731000	4	9182500	9182600	3	34562400	34562500	3	6285500	6285600	2	24564200	24564300	4	15296000
1	10621600	10621700	1	7260600	7260700	1	17734200	17734300	1	17833000	17833100	1	16946600	16946700	1	11397400	11397500	3	14019000	14019100	1	11639000	11639100	2	3319700	3319800	1	14540600	14540700	10	17362800	17362900	2	27756400	27756500	4	9183100	9183200	3	35059200	35059300	3	6532900	6533000	2	24564400	24564500	4	15375700
1	10656900	10657000	1	7274100	7274200	1	17758600	17758700	1	17833300	17833400	1	16947000	16947100	1	11397700	11397800	3	14442300	14442400	1	11640500	11640600	2	3511600	3511700	1	14543600	14543700	10	17709400	17709500	2	27756500	27756600	4	9183600	9183700	3	35059300	35059400	3	6757000	6757100	2	24564700	24564800	4	16493800
1	10660500	10660600	1	7280800	7280900	1	17758700	17758800	1	17846800	17846900	1	16947300	16947400	1	11397800	11397900	3	14468800	14468900	1	11640600	11640700	2	3700000	3700100	1	14681100	14681200	10	17947800	17947900	2	27795500	27795600	4	9183700	9183800	3	35123200	35123300	3	6885200	6885300	2	24601500	24601600	4	17705700
1	10687900	10688000	1	7286900	7287000	1	17771500	17771600	1	17847800	17847900	1	16947400	16947500	1	11398000	11398100	3	14468900	14469000	1	11668100	11668200	2	4094200	4094300	1	14780600	14780700	10	19005400	19005500	2	27832000	27832100	4	9184600	9184700	3	35218700	35218800	3	6885300	6885400	2	24602100	24602200	4	17706100
1	10767200	10767300	1	7295400	7295500	1	17820300	17820400	1	17849400	17849500	1	16947700	16947800	1	11398100	11398200	3	14476800	14476900	1	11674000	11674100	2	4314100	4314200	1	14780700	14780800	10	19244600	19244700	2	27970100	27970200	4	9184700	9184800	3	35218800	35218900	3	7016800	7016900	2	24717600	24717700	4	17706300
1	10811500	10811600	1	7295600	7295700	1	17827700	17827800	1	17932100	17932200	1	16947800	16947900	1	11398200	11398300	3	14611300	14611400	1	11674200	11674300	2	4314200	4314300	1	14798000	14798100	10	19468400	19468500	2	28008600	28008700	4	9198700	9198800	3	35334800	35334900	3	7102900	7103000	2	24717700	24717800	4	18477800
1	10858500	10858600	1	7299800	7299900	1	17827800	17827900	1	17958500	17958600	1	16949100	16949200	1	11398300	11398400	3	14628500	14628600	1	11702400	11702500	2	4348600	4348700	1	14798100	14798200	10	19825700	19825800	2	28008700	28008800	4	9198800	9198900	3	35360500	35360600	3	7103400	7103500	2	24975400	24975500	4	18605000
1	10858600	10858700	1	7299900	7300000	1	17828300	17828400	1	18007500	18007600	1	16949200	16949300	1	11398500	11398600	3	14665000	14665100	1	11702500	11702600	2	4830700	4830800	1	14890000	14890100	10	19987200	19987300	2	28082400	28082500	4	9202500	9202600	3	35360600	35360700	3	7103600	7103700	2	25077800	25077900	4	18605100
1	10861700	10861800	1	7300500	7300600	1	17833300	17833400	1	18008100	18008200	1	16949400	16949500	1	11398700	11398800	3	15043800	15043900	1	11711300	11711400	2	4914600	4914700	1	14890100	14890200	10	20049700	20049800	2	28082500	28082600	4	9202600	9202700	3	35428500	35428600	3	7103700	7103800	2	25247900	25248000	4	18606100
1	10861800	10861900	1	7300600	7300700	1	17833400	17833500	1	18015900	18016000	1	16949500	16949600	1	11399000	11399100	3	15572500	15572600	1	11732200	11732300	2	4924500	4924600	1	14894300	14894400	10	20049800	20049900	2	28085600	28085700	4	9202700	9202800	3	35480300	35480400	3	7170000	7170100	2	25295000	25295100	4	18739700
1	10863700	10863800	1	7305800	7305900	1	17840100	17840200	1	18072300	18072400	1	16949800	16949900	1	11399100	11399200	3	15577600	15577700	1	11736700	11736800	2	4925500	4925600	1	14894400	14894500	10	20049900	20050000	2	28085700	28085800	4	9202800	9202900	3	36090200	36090300	3	7337800	7337900	2	25538500	25538600	4	19217300
1	10878200	10878300	1	7305900	7306000	1	17845600	17845700	1	18106800	18106900	1	16950100	16950200	1	11404600	11404700	3	15588000	15588100	1	11736800	11736900	2	4925600	4925700	1	14960100	14960200	10	20055100	20055200	2	28092800	28092900	4	9203000	9203100	4	575300	575400	3	7388700	7388800	2	25713500	25713600	4	19217400
1	10916100	10916200	1	7306000	7306100	1	17847800	17847900	1	18115900	18116000	1	16953200	16953300	1	11404800	11404900	3	15652500	15652600	1	11737200	11737300	2	4926200	4926300	1	14960200	14960300	10	20055300	20055400	2	28219900	28220000	4	9203200	9203300	4	714000	714100	3	7620900	7621000	2	25931800	25931900	4	19711700
1	10923300	10923400	1	7306400	7306500	1	17848200	17848300	1	18118200	18118300	1	16953300	16953400	1	11408200	11408300	3	15728700	15728800	1	11764400	11764500	2	4926300	4926400	1	14960400	14960500	10	20460300	20460400	2	28232900	28233000	4	9203300	9203400	4	2045800	2045900	3	7621000	7621100	2	25934800	25934900	4	20065200
1	10923400	10923500	1	7306500	7306600	1	17861200	17861300	1	18132900	18133000	1	16953400	16953500	1	11441300	11441400	3	15756400	15756500	1	11767900	11768000	2	4926400	4926500	1	14960500	14960600	10	20467200	20467300	2	28238600	28238700	4	9203400	9203500	4	2085700	2085800	3	7799500	7799600	2	26130100	26130200	4	20065300
1	10923800	10923900	1	7307500	7307600	1	17876800	17876900	1	18196900	18197000	1	16954600	16954700	1	11441400	11441500	3	15849700	15849800	1	11776400	11776500	2	5235100	5235200	1	14961000	14961100	10	20468800	20468900	2	28264600	28264700	4	9203500	9203600	4	2085800	2085900	3	7799600	7799700	2	26184400	26184500	4	20065900
1	10924400	10924500	1	7307600	7307700	1	17881200	17881300	1	18197000	18197100	1	16954700	16954800	1	11441700	11441800	3	15902400	15902500	1	11816000	11816100	2	5383200	5383300	1	14961200	14961300	10	21109500	21109600	2	28264700	28264800	4	9203600	9203700	4	2085900	2086000	3	7956200	7956300	2	26185600	26185700	4	20066000
1	10924600	10924700	1	7315000	7315100	1	17911200	17911300	1	18197100	18197200	1	16954800	16954900	1	11442400	11442500	3	16034700	16034800	1	11823600	11823700	2	5383800	5383900	1	14961300	14961400	10	21109600	21109700	2	28377500	28377600	4	9203700	9203800	4	3283100	3283200	3	7956300	7956400	2	26222300	26222400	4	20066300
1	10924700	10924800	1	7316400	7316500	1	17911300	17911400	1	18204200	18204300	1	16970200	16970300	1	11446800	11446900	3	16262600	16262700	1	11823700	11823800	2	5383900	5384000	1	14961400	14961500	10	21373800	21373900	2	28468300	28468400	4	9203800	9203900	4	5077400	5077500	3	8466400	8466500	2	26222400	26222500	4	20390300
1	10924800	10924900	1	7316500	7316600	1	18007400	18007500	1	18209700	18209800	1	16970300	16970400	1	11447500	11447600	3	16310100	16310200	1	11841600	11841700	2	5384000	5384100	1	14961500	14961600	10	21375400	21375500	2	28468400	28468500	4	9203900	9204000	4	5288700	5288800	3	8735900	8736000	2	26223600	26223700	4	20390400
1	10924900	10925000	1	7324800	7324900	1	18021800	18021900	1	18211400	18211500	1	17018200	17018300	1	11448100	11448200	3	16454400	16454500	1	11882800	11882900	2	5394200	5394300	1	14961600	14961700	10	21716400	21716500	2	28753200	28753300	4	9206400	9206500	4	5827300	5827400	3	8825400	8825500	2	26263400	26263500	4	20436900
1	10925200	10925300	1	7381800	7381900	1	18072300	18072400	1	18211500	18211600	1	17018800	17018900	1	11448300	11448400	3	16553700	16553800	1	11893600	11893700	2	5394400	5394500	1	14961700	14961800	10	22058700	22058800	2	28759000	28759100	4	9206500	9206600	4	6856200	6856300	3	8825500	8825600	2	26263900	26264000	4	20840000
1	10925800	10925900	1	7393900	7394000	1	18077300	18077400	1	18215200	18215300	1	17018900	17019000	1	11448700	11448800	3	17133000	17133100	1	11933300	11933400	2	5824000	5824100	1	14961900	14962000	10	22097500	22097600	2	28759400	28759500	4	9206600	9206700	4	7067700	7067800	3	8881800	8881900	2	26264000	26264100	4	21219700
1	10925900	10926000	1	7394100	7394200	1	18114100	18114200	1	18269200	18269300	1	17064500	17064600	1	11449100	11449200	3	17158500	17158600	1	11939300	11939400	2	5899300	5899400	1	14962000	14962100	10	22511900	22512000	2	28787900	28788000	4	9206700	9206800	4	7067800	7067900	3	9513500	9513600	2	26264100	26264200	4	21417700
1	10926000	10926100	1	7394200	7394300	1	18118700	18118800	1	18269300	18269400	1	17076300	17076400	1	11449200	11449300	3	17160900	17161000	1	11948100	11948200	2	5903400	5903500	1	14962100	14962200	10	22657300	22657400	2	28788000	28788100	4	9206800	9206900	4	7356400	7356500	3	9513600	9513700	2	26264700	26264800	4	21636400
1	10926100	10926200	1	7396400	7396500	1	18133800	18133900	1	18269400	18269500	1	17095500	17095600	1	11449300	11449400	3	17284400	17284500	1	11948200	11948300	2	5903500	5903600	1	14962200	14962300	10	23187900	23188000	2	28850900	28851000	4	9206900	9207000	4	8213800	8213900	3	9808300	9808400	2	26264800	26264900	4	22086300
1	10926200	10926300	1	7396500	7396600	1	18143200	18143300	1	18269500	18269600	1	17114400	17114500	1	11449500	11449600	3	17300300	17300400	1	11951600	11951700	2	5903800	5903900	1	14962300	14962400	11	62300	62400	2	28851000	28851100	4	9207000	9207100	4	8213900	8214000	3	9810800	9810900	2	26264900	26265000	4	22137400
1	10926300	10926400	1	7396600	7396700	1	18148000	18148100	1	18269800	18269900	1	17119600	17119700	1	11449800	11449900	3	17300500	17300600	1	11984400	11984500	2	5903900	5904000	1	14962400	14962500	11	62400	62500	2	28872100	28872200	4	9207100	9207200	4	9090500	9090600	3	10134100	10134200	2	26432000	26432100	4	22215900
1	10927600	10927700	1	7411900	7412000	1	18148100	18148200	1	18270000	18270100	1	17125300	17125400	1	11450200	11450300	3	17300600	17300700	1	12006900	12007000	2	5904000	5904100	1	14962500	14962600	11	211900	212000	2	29122900	29123000	4	9207200	9207300	4	9090700	9090800	3	10134200	10134300	2	26434000	26434100	4	22311400
1	10927700	10927800	1	7428600	7428700	1	18214300	18214400	1	18270500	18270600	1	17125900	17126000	1	11450300	11450400	3	17318300	17318400	1	12029600	12029700	2	5904100	5904200	1	14962600	14962700	11	378400	378500	2	29124900	29125000	4	9207300	9207400	4	9090800	9090900	3	10210300	10210400	2	26478300	26478400	4	22794900
1	10927800	10927900	1	7428900	7429000	1	18269000	18269100	1	18270600	18270700	1	17126000	17126100	1	11450400	11450500	3	17328500	17328600	1	12029700	12029800	2	5904200	5904300	1	14962800	14962900	11	383800	383900	2	29125000	29125100	4	9207400	9207500	4	9094100	9094200	3	10466900	10467000	2	26579700	26579800	4	23001700
1	10927900	10928000	1	7449100	7449200	1	18269100	18269200	1	18270700	18270800	1	17127000	17127100	1	11450500	11450600	3	17368100	17368200	1	12029800	12029900	2	5904300	5904400	1	14962900	14963000	11	383900	384000	2	29140500	29140600	4	9207500	9207600	4	9094200	9094300	3	10725700	10725800	2	26582400	26582500	4	23379400
1	10929300	10929400	1	7450400	7450500	1	18269200	18269300	1	18271000	18271100	1	17130600	17130700	1	11480900	11481000	3	17427900	17428000	1	12085800	12085900	2	5904400	5904500	1	14968000	14968100	11	393600	393700	2	29209800	29209900	4	9207600	9207700	4	9094300	9094400	3	10725800	10725900	2	26582500	26582600	4	23643900
1	10929600	10929700	1	7459200	7459300	1	18269300	18269400	1	18283500	18283600	1	17143500	17143600	1	11490200	11490300	3	17428000	17428100	1	12113800	12113900	2	5904500	5904600	1	14978300	14978400	11	512200	512300	2	29244300	29244400	4	9207700	9207800	4	9094400	9094500	3	10932000	10932100	2	26676800	26676900	4	23644000
1	10929700	10929800	1	7494700	7494800	1	18269400	18269500	1	18283600	18283700	1	17144000	17144100	1	11490300	11490400	3	17444000	17444100	1	12126000	12126100	2	5904600	5904700	1	15017100	15017200	11	513500	513600	2	29256400	29256500	4	9207800	9207900	4	9094500	9094600	3	10932100	10932200	2	26935100	26935200	4	23654000
1	11041400	11041500	1	7503300	7503400	1	18269500	18269600	1	18283800	18283900	1	17162300	17162400	1	11494100	11494200	3	17575800	17575900	1	12142200	12142300	2	5904700	5904800	1	15017300	15017400	11	513600	513700	2	29256500	29256600	4	9207900	9208000	4	9094600	9094700	3	10932200	10932300	2	27134000	27134100	4	23654400
1	11048700	11048800	1	7528100	7528200	1	18269800	18269900	1	18283900	18284000	1	17170900	17171000	1	11521800	11521900	3	17575900	17576000	1	12170900	12171000	2	5904900	5905000	1	15037900	15038000	11	693300	693400	2	29412200	29412300	4	9208000	9208100	4	9094700	9094800	3	10932300	10932400	2	27134100	27134200	4	23654500
1	11064000	11064100	1	7534000	7534100	1	18270800	18270900	1	18346500	18346600	1	17171000	17171100	1	11522100	11522200	3	17576000	17576100	1	12171000	12171100	2	5905000	5905100	1	15038000	15038100	11	959500	959600	2	29525200	29525300	4	9208100	9208200	4	9094800	9094900	3	10932400	10932500	2	27528600	27528700	4	23656400
1	11070700	11070800	1	7555400	7555500	1	18283100	18283200	1	18425800	18425900	1	17171300	17171400	1	11522200	11522300	3	17576100	17576200	1	12178900	12179000	2	5905100	5905200	1	15038100	15038200	11	1267900	1268000	2	29578200	29578300	4	9208200	9208300	4	9094900	9095000	3	10932800	10932900	2	27528700	27528800	4	23656500
1	11078100	11078200	1	7556800	7556900	1	18283800	18283900	1	18426000	18426100	1	17172200	17172300	1	11522300	11522400	3	17748800	17748900	1	12190800	12190900	2	5905200	5905300	1	15038200	15038300	11	1754800	1754900	2	29581000	29581100	4	9208300	9208400	4	9095000	9095100	3	10955300	10955400	2	27528800	27528900	4	23657500
1	11082700	11082800	1	7589200	7589300	1	18283900	18284000	1	18426300	18426400	1	17295900	17296000	1	11524700	11524800	3	18013900	18014000	1	12196300	12196400	2	5905300	5905400	1	15038800	15038900	11	1772300	1772400	2	29703900	29704000	4	9208400	9208500	4	9095100	9095200	3	11086200	11086300	2	27528900	27529000	4	23657700
1	11082800	11082900	1	7607300	7607400	1	18425800	18425900	1	18427400	18427500	1	17409600	17409700	1	11524800	11524900	3	18014000	18014100	1	12213800	12213900	2	5905400	5905500	1	15039600	15039700	11	1985700	1985800	2	29904600	29904700	4	9208500	9208600	4	9095200	9095300	3	11086400	11086500	2	27529000	27529100	4	24471200
1	11082900	11083000	1	7607400	7607500	1	18426000	18426100	1	18427500	18427600	1	17426500	17426600	1	11537800	11537900	3	18014200	18014300	1	12256800	12256900	2	5905500	5905600	1	15039800	15039900	11	1985800	1985900	2	30239200	30239300	4	9208600	9208700	4	9095300	9095400	3	11235400	11235500	2	27529200	27529300	4	24502900
1	11086900	11087000	1	7607500	7607600	1	18429400	18429500	1	18429400	18429500	1	17426600	17426700	1	11549200	11549300	3	18143600	18143700	1	12271300	12271400	2	5905600	5905700	1	15073500	15073600	11	2785400	2785500	2	30308300	30308400	4	9208700	9208800	4	9095400	9095500	3	11276300	11276400	2	27529400	27529500	4	24503000
1	11087000	11087100	1	7613100	7613200	1	18429800	18429900	1	18430600	18430700	1	17428300	17428400	1	11549500	11549600	3	18150900	18151000	1	12273700	12273800	2	5905700	5905800	1	15073600	15073700	11	2785500	2785600	2	30411600	30411700	4	9208800	9208900	4	9095500	9095600	3	11276400	11276500	2	27529500	27529600	4	24768300
1	11088100	11088200	1	7613600	7613700	1	18479300	18479400	1	18474600	18474700	1	17431400	17431500	1	11551700	11551800	3	18308800	18308900	1	12275300	12275400	2	5905800	5905900	1	15089500	15089600	11	2932200	2932300	2	30411900	30412000	4	9208900	9209000	4	9095600	9095700	3	11549600	11549700	2	27579100	27579200	4	24981000
1	11132600	11132700	1	7613900	7614000	1	18543500	18543600	1	18589600	18589700	1	17431500	17431600	1	11557700	11557800	3	18354800	18354900	1	12277100	12277200	2	5905900	5906000	1	15089600	15089700	11	3329900	3330000	2	30718400	30718500	4	9209000	9209100	4	9096100	9096200	3	11976100	11976200	2	27579700	27579800	4	25387100
1	11135100	11135200	1	7614700	7614800	1	18655300	18655400	1	18658800	18658900	1	17570100	17570200	1	11557800	11557900	3	18354900	18355000	1	12293400	12293500	2	5906000	5906100	1	15111300	15111400	11	4107900	4108000	2	30719000	30719100	4	9209100	9209200	4	9096400	9096500	3	12213200	12213300	2	27580200	27580300	4	25573000
1	11169600	11169700	1	7620100	7620200	1	18744000	18744100	1	18744200	18744300	1	17580300	17580400	1	11600100	11600200	3	18407400	18407500	1	12293500	12293600	2	5906100	5906200	1	15155600	15155700	11	4108000	4108100	2	30727500	30727600	4	9209200	9209300	4	9096700	9096800	3	12630400	12630500	2	27581100	27581200	4	25573100
1	11189200	11189300	1	7620200	7620300	1	18776500	18776600	1	18744300	18744400	1	17580400	17580500	1	11645300	11645400	3	18454000	18454100	1	12318100	12318200	2	5906200	5906300	1	15173000	15173100	11	4482800	4482900	2	30822500	30822600	4	9209400	9209500	4	9097000	9097100	3	12630500	12630600	2	27609200	27609300	4	26356500
1	11189400	11189500	1	7620300	7620400	1	18779900	18780000	1	18858800	18858900	1	17700000	17700100	1	11645400	11645500	3	18454200	18454300	1	12318800	12318900	2	5906300	5906400	1	15176200	15176300	11	4522800	4522900	2	30822600	30822700	4	9209600	9209700	4	9097100	9097200	3	12717200	12717300	2	27609300	27609400	4	27239300
1	11190000	11190100	1	7621200	7621300	1	18845500	18845600	1	18890000	18890100	1	17700100	17700200	1	11653300	11653400	3	18460000	18460100	1	12318900	12319000	2	5906400	5906500	1	15176300	15176400	11	5068000	5068100	2	30953000	30953100	4	9209700	9209800	4	9097200	9097300	3	12717300	12717400	2	27609400	27609500	4	27239400
1	11190100	11190200	1	7660600	7660700	1	18850600	18850700	1	18891200	18891300	1	17700900	17701000	1	11702400	11702500	3	18460100	18460200	1	12324300	12324400	2	5906500	5906600	1	15176600	15176700	11	5068100	5068200	2	30953100	30953200	4	9210000	9210100	4	9097400	9097500	3	12866200	12866300	2	27609500	27609600	4	27239600
1	11190300	11190400	1	7700300	7700400	1	18890000	18890100	1	18903400	18903500	1	17701100	17701200	1	11702600	11702700	3	18473000	18473100	1	12346000	12346100	2	6022100	6022200	1	15176700	15176800	11	5241100	5241200	2	30955900	30956000	4	9210400	9210500	4	9097500	9097600	3	12874900	12875000	2	27609600	27609700	4	27239700
1	11190400	11190500	1	7715400	7715500	1	18898700	18898800	1	18903500	18903600	1	17701200	17701300	1	11702700	11702800	3	18500400	18500500	1	12359800	12359900	2	6035200	6035300	1	15176800	15176900	11	5241200	5241300	2	30969100	30969200	4	9571800	9571900	4	9097800	9097900	3	13495200	13495300	2	27725000	27725100	4	27239900
1	11190600	11190700	1	7715600	7715700	1	18898800	18898900	1	18904100	18904200	1	17701300	17701400	1	11703200	11703300	3	18698300	18698400	1	12401500	12401600	2	6099500	6099600	1	15176900	15177000	11	5636300	5636400	2	31549100	31549200	4	9571900	9572000	4	9097900	9098000	3	13611300	13611400	2	27725100	27725200	4	27671700
1	11190700	11190800	1	7723600	7723700	1	18898900	18899000	1	18904700	18904800	1	17701700	17701800	1	11703300	11703400	3	18923600	18923700	1	12401700	12401800	2	6099600	6099700	1	15177400	15177500	11	6659200	6659300	2	31728300	31728400	4	9572000	9572100	4	9098000	9098100	3	13641400	13641500	2	27828100	27828200	4	27671800
1	11190800	11190900	1	7726200	7726300	1	18903100	18903200	1	18904800	18904900	1	17701800	17701900	1	11720000	11720100	3	19995300	19995400	1	12427700	12427800	2	6099700	6099800	1	15184500	15184600	11	6659300	6659400	2	31864100	31864200	4	9572200	9572300	4	9098100	9098200	3	13641500	13641600	2	27828200	27828300	4	27856500
1	11195400	11195500	1	7727700	7727800	1	18904100	18904200	1	18905700	18905800	1	17701900	17702000	1	11764500	11764600	3	20608200	20608300	1	12483200	12483300	2	6215700	6215800	1	15184600	15184700	11	7191700	7191800	2	31967100	31967200	4	9572300	9572400	4	9098200	9098300	3	13644900	13645000	2	27828400	27828500	4	28155000
1	11195500	11195600	1	7728400	7728500	1	18904500	18904600	1	19011900	19012000	1	17702000	17702100	1	11770300	11770400	3	20741500	20741600	1	12483400	12483500	2	6458300	6458400	1	15289600	15289700	11	7191800	7191900	2	32205700	32205800	4	9572400	9572500	4	9098300	9098400	3	14034300	14034400	2	27828500	27828600	4	28155100
1	11195600	11195700	1	7728500	7728600	1	18904700	18904800	1	19022900	19023000	1	17702600	17702700	1	11823700	11823800	3	21026500	21026600	1	12550500	12550600	2	6663900	6664000	1	15328800	15328900	11	7677100	7677200	2	32205800	32205900	4	9641100	9641200	4	9098400	9098500	3	14034400	14034500	2	27828700	27828800	4	28303200
1	11196100	11196200	1	7759300	7759400	1	18904800	18904900	1	19023000	19023100	1	17702700	17702800	1	11828100	11828200	3	21026600	21026700	1	12563400	12563500	2	6760100	6760200	1	15367000	15367100	11	8806200	8806300	2	32210600	32210700	4	10615700	10615800	4	9098500	9098600	3	14034600	14034700	2	28200300	28200400	4	29151800
1	11196200	11196300	1	7768100	7768200	1	18906700	18906800	1	19023100	19023200	1	17703200	17703300	1	11831000	11831100	3	21026700	21026800	1	12564900	12565000	2	6760200	6760300	1	15369600	15369700	11	8806300	8806400	2	32211600	32211700	4	11012200	11012300	4	9098600	9098700	3	14034700	14034800	2	28201600	28201700	4	29151900
1	11196300	11196400	1	7768200	7768300	1	18906900	18907000	1	19041700	19041800	1	17703600	17703700	1	11839300	11839400	3	21026800	21026900	1	12568200	12568300	2	6760500	6760600	1	15370000	15370100	11	8914300	8914400	2	32211700	32211800	4	11052100	11052200	4	9098700	9098800	3	14034800	14034900	2	28202200	28202300	4	29712500
1	11196500	11196600	1	7778600	7778700	1	18952700	18952800	1	19041800	19041900	1	17704100	17704200	1	11847300	11847400	3	21113700	21113800	1	12577600	12577700	2	6760800	6760900	1	15370200	15370300	11	10010300	10010400	2	32293400	32293500	4	11281700	11281800	4	9098800	9098900	3	14117000	14117100	2	28309100	28309200	4	29960300
1	11196700	11196800	1	7778700	7778800	1	18988800	18988900	1	19057300	19057400	1	17768900	17769000	1	11847400	11847500	3	21360200	21360300	1	12577900	12578000	2	6760900	6761000	1	15370400	15370500	11	10356900	10357000	2	32338700	32338800	4	11739000	11739100	4	9098900	9099000	3	14117100	14117200	2	28402200	28402300	4	30027600
1	11196800	11196900	1	7787400	7787500	1	18997500	18997600	1	19067900	19068000	1	17842600	17842700	1	11886200	11886300	3	21360300	21360400	1	12622100	12622200	2	6761100	6761200	1	15370500	15370600	11	11596300	11596400	2	32352800	32352900	4	11739100	11739200	4	9099000	9099100	3	14330900	14331000	2	28598100	28598200	4	30074900
1	11197200	11197300	1	7787500	7787600	1	19001700	19001800	1	19194200	19194300	1	17842900	17843000	1	11886300	11886400	3	21360400	21360500	1	12673100	12673200	2	6761200	6761300	1	15370600	15370700	11	12094000	12094100	2	32429500	32429600	4	12325800	12325900	4	9099100	9099200	3	14466400	14466500	2	28599500	28599600	4	30536300
1	11197300	11197400	1	7788000	7788100	1	19001800	19001900	1	19211300	19211400	1	17843000	17843100	1	11886500	11886600	3	21360500	21360600	1	12673200	12673300	2	6761300	6761400	1	15512100	15512200	11	12094100	12094200	2	32429600	32429700	4	12415200	12415300	4	9099200	9099300	3	14703500	14703600	2	28715300	28715400	4	30944100
1	11197400	11197500	1	7788100	7788200	1	19023100	19023200	1	19212500	19212600	1	17843200	17843300	1	11891300	11891400	3	21370800	21370900	1	12678300	12678400	2	6761400	6761500	1	15526900	15527000	11	12096400	12096500	2	32431100	32431200	4	12415300	12415400	4	9099300	9099400	3	14738500	14738600	2	28715400	28715500	4	30984400
1	11197700	11197800	1	7815800	7815900	1	19040200	19040300	1	19214500	19214600	1	17843500	17843600	1	11891400	11891500	3	21475000	21475100	1	12696700	12696800	2	6761700	6761800	1	15527100	15527200	11	12117000	12117100	2	32560000	32560100	4	12893800	12893900	4	9099400	9099500	3	14738600	14738700	2	28715500	28715600	4	31409800
1	11197800	11197900	1	7819900	7820000	1	19041700	19041800	1	19217800	19217900	1	17844200	17844300	1	11916000	11916100	3	21661400	21661500	1	12709900	12710000	2	6762000	6762100	1	15527200	15527300	11	12118100	12118200	2	32562600	32562700	4	13994400	13994500	4	9099500	9099600	3	14942400	14942500	2	28715600	28715700	4	31704100
1	11197900	11198000	1	7868000	7868100	1	19041800	19041900	1	19217900	19218000	1	17844300	17844400	1	11928300	11928400	3	21995100	21995200	1	12717900	12718000	2	6762400	6762500	1	15527400	15527500	11	12118200	12118300	2	32626600	32626700	4	14282100	14282200	4	9099600	9099700	3	15007400	15007500	2	28715700	28715800	4	31964300
1	11198000	11198100	1	7868100	7868200	1	19193900	19194000	1	19219600	19219700	1	17844400	17844500	1	11928700	11928800	3	22247700	22247800	1	12718000	12718100	2	6762500	6762600	1	15527700	15527800	11	12123300	12123400	2	32729600	32729700	4	15009400	15009500	4	9099700	9099800	3	15007500	15007600	2	28715800	28715900	4	31964500
1	11198100	11198200	1	7872900	7873000	1	19204700	19204800	1	19219700	19219800	1	17845500	17845600	1	11928800	11928900	3	22365900	22366000	1	12719000	12719100	2	6770000	6770100	1	15527900	15528000	11	12123400	12123500	2	32746100	32746200	4	15514300	15514400	4	9099800	9099900	3	15535500	15535600	2	28715900	28716000	4	32152700
1	11198300	11198400	1	7873500	7873600	1	19210700	19210800	1	19223800	19223900	1	17845600	17845700	1	11929000	11929100	3	22443100	22443200	1	12724700	12724800	2	6770100	6770200	1	15528000	15528100	11	12150900	12151000	2	32846300	32846400	4	15514400	15514500	4	9099900	9100000	3	16222300	16222400	2	28716000	28716100	4	32152800
1	11198600	11198700	1	7881900	7882000	1	19211600	19211700	1	19225000	19225100	1	17845700	17845800	1	11929300	11929400	3	22534600	22534700	1	12760400	12760500	2	6775800	6775900	1	15629300	15629400	11	12151000	12151100	2	32851100	32851200	4	15535900	15536000	4	9100000	9100100	3	16309500	16309600	2	28716100	28716200	4	32152900
1	11198800	11198900	1	7882000	7882100	1	19212100	19212200	1	19226100	19226200	1	17845800	17845900	1	11929600	11929700	3	22974800	22974900	1	12761000	12761100	2	6795700	6795800	1	15629400	15629500	11	12161500	12161600	2	32851200	32851300	4	15611400	15611500	4	9100100	9100200	3	16309600	16309700	2	28716200	28716300	4	32154200
1	11199000	11199100	1	7896600	7896700	1	19212500	19212600	1	19237600	19237700	1	17849400	17849500	1	11937500	11937600	3	23159700	23159800	1	12761100	12761200	2	6795800	6795900	1	15722500	15722600	11	12434200	12434300	2	32851400	32851500	4	15774000	15774100	4	9100200	9100300	3	16393900	16394000	2	28716300	28716400	4	32154300
1	11205000	11205100	1	7896700	7896800	1	19213000	19213100	1	19237700	19237800	1	17849500	17849600	1	11937600	11937700	3	23174800	23174900	1	12763900	12764000	2	6796100	6796200	1	15722600	15722700	11	12641700	12641800	2	32851600	32851700	4	16233100	16233200	4	9100300	9100400	3	16605800	16605900	2	28716400	28716500	4	32244400
1	11213700	11213800	1	7909300	7909400	1	19219600	19219700	1	19237900	19238000	1	17867500	17867600	1	11937900	11938000	3	23350100	23350200	1	12876300	12876400	2	6796200	6796300	1	15739600	15739700	11	13630400	13630500	2	32858400	32858500	4	16312300	16312400	4	9100400	9100500	3	16788300	16788400	2	28716500	28716600	4	32336700
1	11213900	11214000	1	7916500	7916600	1	19219700	19219800	1	19263800	19263900	1	17881300	17881400	1	11938000	11938100	3	23498300	23498400	1	12892400	12892500	2	6796300	6796400	1	15777100	15777200	11	14154400	14154500	2	32873100	32873200	4	17705700	17705800	4	9100500	9100600	3	16788400	16788500	2	28716600	28716700	4	32336800
1	11236400	11236500	1	7916600	7916700	1	19221000	19221100	1	19263900	19264000	1	18071900	18072000	1	11938200	11938300	3	23611900	23612000	1	12909900	12910000	2	6796400	6796500	1	15777200	15777300	11	14159800	14159900	2	32919300	32919400	4	17705800	17705900	4	9100600	9100700	3	16841300	16841400	2	28716700	28716800	4	32336900
1	11272000	11272100	1	7917800	7917900	1	19221100	19221200	1	19480800	19480900	1	18115000	18115100	1	11938300	11938400	3	23612100	23612200	1	12910300	12910400	2	6796500	6796600	1	15889000	15889100	11	14159900	14160000	2	32919400	32919500	4	17705900	17706000	4	9100700	9100800	3	16841400	16841500	2	28716800	28716900	4	32340900
1	11291300	11291400	1	7917900	7918000	1	19223800	19223900	1	19483700	19483800	1	18117800	18117900	1	11938500	11938600	3	23733700	23733800	1	12931000	12931100	2	6796600	6796700	1	15913900	15914000	11	15413600	15413700	2	32920000	32920100	4	17706100	17706200	4	9100800	9100900	3	16841600	16841700	2	28716900	28717000	4	32341100
1	11316000	11316100	1	7926600	7926700	1	19225500	19225600	1	19483800	19483900	1	18118000	18118100	1	11938900	11939000	3	23733800	23733900	1	12939800	12939900	2	6796700	6796800	1	15922600	15922700	11	15598200	15598300	2	33297800	33297900	4	17706200	17706300	4	9100900	9101000	3	16878900	16879000	2	28717700	28717800	4	32413500
1	11345600	11345700	1	7926700	7926800	1	19239200	19239300	1	19484200	19484300	1	18118600	18118700	1	11948100	11948200	3	23811700	23811800	1	12945500	12945600	2	6797300	6797400	1	16044900	16045000	11	16183700	16183800	2	33380800	33380900	4	17706300	17706400	4	9101000	9101100	3	16879000	16879100	2	28718000	28718100	4	32747000
1	11345700	11345800	1	7927900	7928000	1	19285900	19286000	1	19484300	19484400	1	18118700	18118800	1	11948300	11948400	3	23901100	23901200	1	12946400	12946500	2	6797400	6797500	1	16057300	16057400	11	17347200	17347300	2	33416900	33417000	4	17706400	17706500	4	9101100	9101200	3	16942100	16942200	2	28718400	28718500	4	32898500
1	11348700	11348800	1	7928000	7928100	1	19410200	19410300	1	19484400	19484500	1	18121300	18121400	1	12005700	12005800	3	23982600	23982700	1	12946500	12946600	2	6797900	6798000	1	16097900	16098000	11	17684400	17684500	2	33417000	33417100	4	18179300	18179400	4	9101300	9101400	3	17204600	17204700	2	28718500	28718600	4	32898800
1	11353900	11354000	1	7950800	7950900	1	19483700	19483800	1	19484500	19484600	1	18122700	18122800	1	12005800	12005900	3	24160600	24160700	1	12986200	12986300	2	6798000	6798100	1	16174000	16174100	11	17889700	17889800	2	33435800	33435900	4	18210700	18210800	4	9101400	9101500	3	17283900	17284000	2	28718600	28718700	4	32898900
1	11362200	11362300	1	7950900	7951000	1	19484300	19484400	1	19484600	19484700	1	18122900	18123000	1	12005900	12006000	3	24511200	24511300	1	12986300	12986400	2	6798100	6798200	1	16174100	16174200	11	18061900	18062000	2	33449700	33449800	4	18389200	18389300	4	9101500	9101600	3	17827500	17827600	2	28718800	28718900	4	32899000
1	11362300	11362400	1	7951100	7951200	1	19484400	19484500	1	19484700	19484800	1	18143200	18143300	1	12006000	12006100	3	24649800	24649900	1	12986500	12986600	2	6852600	6852700	1	16174200	16174300	11	19977500	19977600	2	33465400	33465500	4	18476800	18476900	4	9101700	9101800	3	17993500	17993600	2	28718900	28719000	4	32899100
1	11362400	11362500	1	7952600	7952700	1	19484500	19484600	1	19484800	19484900	1	18143300	18143400	1	12006100	12006200	3	24914900	24915000	1	12989200	12989300	2	7052200	7052300	1	16174300	16174400	11	20298000	20298100	2	33651300	33651400	4	18477800	18477900	4	9101800	9101900	3	18448000	18448100	2	28719100	28719200	4	32899300
1	11362600	11362700	1	7965800	7965900	1	19484600	19484700	1	19484900	19485000	1	18143600	18143700	1	12006500	12006600	3	24915000	24915100	1	13042000	13042100	2	7052300	7052400	1	16174600	16174700	11	20298100	20298200	2	33671100	33671200	4	18477900	18478000	4	9102100	9102200	3	18586000	18586100	2	28719200	28719300	4	32927200
1	11362700	11362800	1	7976100	7976200	1	19484700	19484800	1	19485000	19485100	1	18143700	18143800	1	12006600	12006700	3	24969000	24969100	1	13042300	13042400	2	7099600	7099700	1	16174700	16174800	11	20298200	20298300	2	33919400	33919500	4	18670900	18671000	4	9106000	9106100	3	18586100	18586200	2	28719300	28719400	4	32927300
1	11363000	11363100	1	7977100	7977200	1	19484800	19484900	1	19485100	19485200	1	18143800	18143900	1	12006800	12006900	3	25022700	25022800	1	13046800	13046900	2	7099700	7099800	1	16417800	16417900	11	20303500	20303600	2	33919500	33919600	4	19100100	19100200	4	9109200	9109300	3	18588900	18589000	2	28719400	28719500	4	32927400
1	11363200	11363300	1	7977200	7977300	1	19485000	19485100	1	19485200	19485300	1	18143900	18144000	1	12006900	12007000	3	25203900	25204000	1	13110600	13110700	2	7234700	7234800	1	16574600	16574700	11	20303600	20303700	2	33960100	33960200	4	19100400	19100500	4	9109300	9109400	3	18589100	18589200	2	28719500	28719600	4	32927500
1	11363300	11363400	1	7977500	7977600	1	19485100	19485200	1	19485300	19485400	1	18144000	18144100	1	12010900	12011000	3	25204000	25204100	1	13117400	13117500	2	7261400	7261500	1	16574800	16574900	11	20400800	20400900	2	34024200	34024300	4	19197000	19197100	4	9109400	9109500	3	18896800	18896900	2	28719600	28719700	4	32927600
1	11363400	11363500	1	7977600	7977700	1	19485200	19485300	1	19485400	19485500	1	18144200	18144300	1	12011000	12011100	3	25204100	25204200	1	13122400	13122500	2	7402200	7402300	1	16575200	16575300	11	20523800	20523900	2	34284200	34284300	4	19358100	19358200	4	9109500	9109600	3	19309900	19310000	2	28719700	28719800	4	32927700
1	11363500	11363600	1	7990800	7990900	1	19485300	19485400	1	19485500	19485600	1	18242100	18242200	1	12011100	12011200	3	25213300	25213400	1	13125900	13126000	2	7411800	7411900	1	16575300	16575400	11	20523900	20524000	2	34308400	34308500	4	20545300	20545400	4	9109600	9109700	3	19315300	19315400	2	28719800	28719900	4	32927800
1	11397200	11397300	1	7990900	7991000	1	19485600	19485700	1	19485600	19485700	1	18242200	18242300	1	12029800	12029900	3	25257300	25257400	1	13128600	13128700	2	7412200	7412300	1	16575400	16575500	11	20594400	20594500	2	34308500	34308600	4	20709500	20709600	4	9109700	9109800	3	19778500	19778600	2	28719900	28720000	4	32927900
1	11397300	11397400	1	7991200	7991300	1	19486000	19486100	1	19485700	19485800	1	18242300	18242400	1	12038000	12038100	3	25258000	25258100	1	13156000	13156100	2	7412400	7412500	1	16576000	16576100	11	20649500	20649600	2	34420900	34421000	4	20709600	20709700	4	9109800	9109900	3	20156800	20156900	2	28720000	28720100	4	32928000
1	11438000	11438100	1	7992200	7992300	1	19486500	19486600	1	19485900	19486000	1	18242400	18242500	1	12096400	12096500	3	25258100	25258200	1	13201700	13201800	2	7588300	7588400	1	16576100	16576200	11	20669000	20669100	2	34434800	34434900	4	20709700	20709800	4	9109900	9110000	3	21191600	21191700	2	28720100	28720200	4	32928100
1	11459800	11459900	1	7992400	7992500	1	19727100	19727200	1	19486000	19486100	1	18264300	18264400	1	12170900	12171000	3	25331600	25331700	1	13209900	13210000	2	7606400	7606500	1	16576300	16576400	11	20669200	20669300	2	34520800	34520900	4	20878300	20878400	4	9110000	9110100	3	21191700	21191800	2	28720200	28720300	4	33252900
1	11459900	11460000	1	7992500	7992600	1	19862500	19862600	1	19486200	19486300	1	18325100	18325200	1	12178600	12178700	3	25466700	25466800	1	13291000	13291100	2	7606500	7606600	1	16586000	16586100	11	20815400	20815500	2	34538000	34538100	4	20973700	20973800	4	9110600	9110700	3	22169800	22169900	2	28720300	28720400	4	33253000
1	11469600	11469700	1	8012300	8012400	1	19863400	19863500	1	19486500	19486600	1	18342900	18343000	1	12196600	12196700	3	25652600	25652700	1	13341700	13341800	2	7606600	7606700	1	16641400	16641500	11	20947500	20947600	2	34560400	34560500	4	21138700	21138800	4	9111600	9111700	3	22380300	22380400	2	28720400	28720500	4	33358500
1	11469700	11469800	1	8016900	8017000	1	19880200	19880300	1	19486600	19486700	1	18474600	18474700	1	12214300	12214400	3	25655800	25655900	1	13350700	13350800	2	7606700	7606800	1	16656000	16656100	11	20947600	20947700	2	34580500	34580600	4	21147900	21148000	4	9111800	9111900	3	22631600	22631700	2	28720500	28720600	4	33957100
1	11471100	11471200	1	8025700	8025800	1	19990400	19990500	1	19487300	19487400	1	18517200	18517300	1	12214700	12214800	3	25878600	25878700	1	13353300	13353400	2	7607000	7607100	1	16656300	16656400	11	20949200	20949300	2	34710700	34710800	4	21219700	21219800	4	9113300	9113400	3	22927400	22927500	2	28720600	28720700	4	33960800
1	11471200	11471300	1	8025800	8025900	1	19992000	19992100	1	19726500	19726600	1	18517300	18517400	1	12214800	12214900	3	25935900	25936000	1	13353400	13353500	2	7607100	7607200	1	16659100	16659200	11	20950200	20950300	2	34833400	34833500	4	21590000	21590100	4	9114500	9114600	3	23383100	23383200	2	28720700	28720800	4	33962000
1	11471300	11471400	1	8046200	8046300	1	20013400	20013500	1	19859700	19859800	1	18517900	18518000	1	12214900	12215000	3	26113400	26113500	1	13359100	13359200	2	7607200	7607300	1	16688200	16688300	11	21655200	21655300	2	34853300	34853400	4	22086300	22086400	4	9114600	9114700	3	23658600	23658700	2	28720800	28720900	4	33962100
1	11471400	11471500	1	8080400	8080500	1	20108600	20108700	1	19902300	19902400	1	18518300	18518400	1	12215000	12215100	3	26271800	26271900	1	13359300	13359400	2	7607300	7607400	1	16705000	16705100	11	22285100	22285200	2	34890600	34890700	4	22137400	22137500	4	9115400	9115500	3	23659100	23659200	2	28720900	28721000	4	33963200
1	11471500	11471600	1	8080500	8080600	1	20171500	20171600	1	19953800	19953900	1	18518400	18518500	1	12215100	12215200	3	26290100	26290200	1	13359400	13359500	2	7607400	7607500	1	16705200	16705300	11	22285200	22285300	2	34897900	34898000	4	22209900	22210000	4	9116000	9116100	3	23659200	23659300	2	28721000	28721100	4	35086600
1	11471600	11471700	1	8080700	8080800	1	20171600	20171700	1	19978100	19978200	1	18547400	18547500	1	12215200	12215300	3	26290200	26290300	1	13378200	13378300	2	7607900	7608000	1	16705300	16705400	11	22371300	22371400	2	35055900	35056000	4	22291200	22291300	4	9116300	9116400	3	23659500	23659600	2	28721100	28721200	4	35471500
1	11471700	11471800	1	8081600	8081700	1	20180200	20180300	1	19990800	19990900	1	18552700	18552800	1	12215300	12215400	3	26290300	26290400	1	13409000	13409100	2	7608000	7608100	1	16738200	16738300	11	22629100	22629200	2	35056000	35056100	4	22311400	22311500	4	9118500	9118600	3	23659800	23659900	2	28721200	28721300	4	35471600
1	11472000	11472100	1	8110000	8110100	1	20183800	20183900	1	19990900	19991000	1	18599700	18599800	1	12275300	12275400	3	26411900	26412000	1	13409100	13409200	2	7608200	7608300	1	16837800	16837900	11	22629200	22629300	2	35212900	35213000	4	22545500	22545600	4	9118600	9118700	3	23659900	23660000	2	28721400	28721500	5	419800
1	11472100	11472200	1	8112700	8112800	1	20220200	20220300	1	20046600	20046700	1	18599800	18599900	1	12275700	12275800	3	26507500	26507600	1	13409200	13409300	2	7608300	7608400	1	16837900	16838000	11	23200400	23200500	2	35269000	35269100	4	22650300	22650400	4	9121100	9121200	3	23734700	23734800	2	28721500	28721600	5	419900
1	11472300	11472400	1	8123100	8123200	1	20237200	20237300	1	20237200	20237300	1	18600100	18600200	1	12277100	12277200	3	26556400	26556500	1	13417700	13417800	2	7608400	7608500	1	16846400	16846500	11	23753600	23753700	2	35349000	35349100	4	22651100	22651200	4	9121200	9121300	3	23914700	23914800	2	28721600	28721700	5	420900
1	11472700	11472800	1	8138700	8138800	1	20327800	20327900	1	20365900	20366000	1	18629500	18629600	1	12391300	12391400	3	26595000	26595100	1	13421500	13421600	2	7608500	7608600	1	16846800	16846900	11	23783700	23783800	2	35406800	35406900	4	22911600	22911700	4	9121300	9121400	3	24062500	24062600	2	28721700	28721800	5	880800
1	11472900	11473000	1	8139200	8139300	1	20380000	20380100	1	20366000	20366100	1	18631200	18631300	1	12443300	12443400	3	26696300	26696400	1	13425200	13425300	2	7609000	7609100	1	16957100	16957200	11	23848700	23848800	2	35595000	35595100	4	23001700	23001800	4	9121900	9122000	3	24203200	24203300	2	28721800	28721900	5	915600
1	11473200	11473300	1	8142700	8142800	1	20380400	20380500	1	20369700	20369800	1	18631300	18631400	1	12443400	12443500	3	26714000	26714100	1	13431900	13432000	2	7650700	7650800	1	16957200	16957300	11	24439700	24439800	2	35595100	35595200	4	23031700	23031800	4	9123100	9123200	3	24329900	24330000	2	28721900	28722000	5	916100
1	11473500	11473600	1	8144000	8144100	1	20435100	20435200	1	20371400	20371500	1	18798100	18798200	1	12454600	12454700	3	26733800	26733900	1	13432300	13432400	2	7664000	7664100	1	16960500	16960600	11	24780800	24780900	2	35617700	35617800	4	23465900	23466000	4	9123200	9123300	3	24957300	24957400	2	29074100	29074200	5	916200
1	11473600	11473700	1	8148500	8148600	1	20440800	20440900	1	20371500	20371600	1	18805600	18805700	1	12454700	12454800	3	26866900	26867000	1	13432500	13432600	2	7693900	7694000	1	16960900	16961000	11	25341600	25341700	3	191600	191700	4	23480300	23480400	4	9123500	9123600	3	24957400	24957500	2	29158000	29158100	5	916400
1	11473700	11473800	1	8148600	8148700	1	20440900	20441000	1	20444500	20444600	1	18806200	18806300	1	12467100	12467200	3	26977600	26977700	1	13433200	13433300	2	8343900	8344000	1	16974800	16974900	11	25491800	25491900	3	191700	191800	4	23643700	23643800	4	9125200	9125300	3	25305200	25305300	2	29158100	29158200	5	935300
1	11473800	11473900	1	8156500	8156600	1	20444500	20444600	1	20444600	20444700	1	18814300	18814400	1	12475900	12476000	3	27116800	27116900	1	13435500	13435600	2	8344100	8344200	1	16978400	16978500	11	26039200	26039300	3	353000	353100	4	23643800	23643900	4	9125300	9125400	3	25480800	25480900	2	29160700	29160800	5	935400
1	11473900	11474000	1	8159200	8159300	1	20444800	20444900	1	20444800	20444900	1	18814400	18814500	1	12476000	12476100	3	27178300	27178400	1	13435600	13435700	2	8344200	8344300	1	17139400	17139500	11	26039300	26039400	3	353500	353600	4	23643900	23644000	4	9126000	9126100	3	25480900	25481000	2	30224500	30224600	5	966200
1	11474000	11474100	1	8159300	8159400	1	20453400	20453500	1	20452100	20452200	1	18850500	18850600	1	12483900	12484000	3	27310600	27310700	1	13468200	13468300	2	8344300	8344400	1	17143600	17143700	11	26207000	26207100	3	565300	565400	4	23644000	23644100	4	9126100	9126200	3	25481200	25481300	2	30313300	30313400	5	2107400
1	11474100	11474200	1	8161600	8161700	1	20461100	20461200	1	20505500	20505600	1	18898800	18898900	1	12523600	12523700	3	27444300	27444400	1	13478000	13478100	2	8344400	8344500	1	17143700	17143800	11	26669000	26669100	3	711400	711500	4	23644100	23644200	4	9126800	9126900	3	25481300	25481400	2	30846300	30846400	5	2107500
1	11474200	11474300	1	8186800	8186900	1	20597200	20597300	1	20505600	20505700	1	18898900	18899000	1	12622200	12622300	3	27444500	27444600	1	13533900	13534000	2	8344500	8344600	1	17144000	17144100	11	26696300	26696400	3	711500	711600	4	23644300	23644400	4	9127100	9127200	3	25668300	25668400	2	30847600	30847700	5	2107600
1	11474300	11474400	1	8186900	8187000	1	20597300	20597400	1	20600900	20601000	1	18902200	18902300	1	12634000	12634100	3	27571600	27571700	1	13550000	13550100	2	8344600	8344700	1	17148900	17149000	11	26696400	26696500	3	743900	744000	4	23646300	23646400	4	9127900	9128000	3	25701000	25701100	2	30848200	30848300	5	2351200
1	11474600	11474700	1	8189200	8189300	1	20651100	20651200	1	20611300	20611400	1	18902400	18902500	1	12709900	12710000	3	27571800	27571900	1	13569700	13569800	2	8344700	8344800	1	17171200	17171300	11	27901200	27901300	3	877800	877900	4	23653600	23653700	4	9128000	9128100	3	26009000	26009100	2	30920600	30920700	5	2351300
1	11474800	11474900	1	8227400	8227500	1	20660600	20660700	1	20613100	20613200	1	18902800	18902900	1	12720200	12720300	3	27916800	27916900	1	13590500	13590600	2	8344800	8344900	1	17231400	17231500	11	27901300	27901400	3	898900	899000	4	23653700	23653800	4	9128100	9128200	3	26228900	26229000	2	30926900	30927000	5	3009500
1	11474900	11475000	1	8244300	8244400	1	20662100	20662200	1	20616700	20616800	1	18903100	18903200	1	12720300	12720400	3	28058000	28058100	1	13618800	13618900	2	8344900	8345000	1	17238300	17238400	11	27906600	27906700	3	899000	899100	4	23653800	23653900	4	9128300	9128400	3	26229000	26229100	2	30927000	30927100	5	3009900
1	11475000	11475100	1	8247400	8247500	1	20672400	20672500	1	20616800	20616900	1	18905700	18905800	1	12772000	12772100	3	28058100	28058200	1	13621800	13621900	2	8345300	8345400	1	17251100	17251200	11	27906700	27906800	3	900100	900200	4	23653900	23654000	4	9128400	9128500	3	26237900	26238000	2	31449100	31449200	5	3011400
1	11478400	11478500	1	8250300	8250400	1	20687100	20687200	1	20637200	20637300	1	18905800	18905900	1	12772100	12772200	3	28218600	28218700	1	13635900	13636000	2	8345400	8345500	1	17280900	17281000	11	27906800	27906900	3	1038300	1038400	4	23654500	23654600	4	9128500	9128600	3	26412400	26412500	2	31449200	31449300	5	3231900
1	11490600	11490700	1	8267600	8267700	1	20696700	20696800	1	20637300	20637400	1	18906500	18906600	1	12838400	12838500	3	28246700	28246800	1	13636000	13636100	2	8345500	8345600	1	17281000	17281100	12	58400	58500	3	1048100	1048200	4	23657300	23657400	4	9129000	9129100	3	26456700	26456800	2	31813000	31813100	5	3232000
1	11491300	11491400	1	8279700	8279800	1	20754500	20754600	1	20648600	20648700	1	18906600	18906700	1	12838500	12838600	3	28303400	28303500	1	13654300	13654400	2	8346100	8346200	1	17300000	17300100	12	58500	58600	3	1087900	1088000	4	23657400	23657500	4	9130000	9130100	3	26456800	26456900	2	31819900	31820000	5	3232200
1	11503300	11503400	1	8311400	8311500	1	20759000	20759100	1	20648700	20648800	1	18906700	18906800	1	12844100	12844200	3	28378800	28378900	1	13684900	13685000	2	8346200	8346300	1	17300500	17300600	12	733200	733300	3	1108900	1109000	4	23657500	23657600	4	9130600	9130700	3	26459100	26459200	2	32074200	32074300	5	3266400
1	11509800	11509900	1	8318500	8318600	1	20759100	20759200	1	20690600	20690700	1	18906800	18906900	1	12844200	12844300	3	28379200	28379300	1	13685000	13685100	2	8346300	8346400	1	17300600	17300700	12	747700	747800	3	1109000	1109100	4	23657600	23657700	4	9131100	9131200	3	26682600	26682700	2	32074300	32074400	5	3266500
1	11509900	11510000	1	8325000	8325100	1	20759600	20759700	1	20692100	20692200	1	18906900	18907000	1	12844500	12844600	3	28446300	28446400	1	13685400	13685500	2	8346400	8346500	1	17328600	17328700	12	747800	747900	3	1124600	1124700	4	23657700	23657800	4	9132100	9132200	3	26682700	26682800	2	32075800	32075900	5	3535400
1	11510200	11510300	1	8325100	8325200	1	20863000	20863100	1	20696000	20696100	1	18947400	18947500	1	12856700	12856800	3	28496700	28496800	1	13690200	13690300	2	8346500	8346600	1	17328700	17328800	12	839600	839700	3	1124700	1124800	4	23657800	23657900	4	9132300	9132400	3	26774400	26774500	2	32076600	32076700	5	3634300
1	11522000	11522100	1	8325900	8326000	1	20884200	20884300	1	20739500	20739600	1	19041700	19041800	1	12909900	12910000	3	28578700	28578800	1	13691300	13691400	2	8959000	8959100	1	17329000	17329100	12	1045500	1045600	3	1124800	1124900	4	23658300	23658400	4	9133800	9133900	3	26774500	26774600	2	32076700	32076800	5	3634400
1	11524800	11524900	1	8326000	8326100	1	20903900	20904000	1	20758200	20758300	1	19041800	19041900	1	12910000	12910100	3	28614200	28614300	1	13852900	13853000	2	8959100	8959200	1	17329500	17329600	12	1248400	1248500	3	1142600	1142700	4	23658500	23658600	4	9135000	9135100	3	26833800	26833900	2	32077200	32077300	5	3804400
1	11547800	11547900	1	8340100	8340200	1	20914200	20914300	1	20758300	20758400	1	19104800	19104900	1	13179700	13179800	3	28616000	28616100	1	13853000	13853100	2	9114100	9114200	1	17329600	17329700	12	1276200	1276300	3	1159700	1159800	4	23658800	23658900	4	9135100	9135200	3	26833900	26834000	2	32127400	32127500	5	3893300
1	11549200	11549300	1	8340200	8340300	1	20918200	20918300	1	20759000	20759100	1	19128200	19128300	1	13201600	13201700	3	28616100	28616200	1	13853100	13853200	2	9130700	9130800	1	17329700	17329800	12	1276300	1276400	3	1209400	1209500	4	23658900	23659000	4	9136100	9136200	3	26834000	26834100	2	32229200	32229300	5	3893600
1	11549300	11549400	1	8341300	8341400	1	20922400	20922500	1	20759400	20759500	1	19128300	19128400	1	13220700	13220800	3	28616400	28616500	1	13854100	13854200	2	9130800	9130900	1	17329800	17329900	12	1276400	1276500	3	1256200	1256300	4	24110900	24111000	4	9136200	9136300	3	26837800	26837900	2	32229900	32230000	5	4772600
1	11557300	11557400	1	8344000	8344100	1	20964500	20964600	1	20759500	20759600	1	19172300	19172400	1	13234900	13235000	3	28646000	28646100	1	13854200	13854300	2	9440100	9440200	1	17409600	17409700	12	1276500	1276600	3	1256300	1256400	4	24768400	24768500	4	9136300	9136400	3	26838700	26838800	2	32252500	32252600	5	4883900
1	11557400	11557500	1	8344100	8344200	1	20965100	20965200	1	20759600	20759700	1	19210700	19210800	1	13272000	13272100	3	28947100	28947200	1	13882600	13882700	2	9454000	9454100	1	17488300	17488400	12	1281700	1281800	3	1258100	1258200	4	24785300	24785400	4	9136400	9136500	3	26838800	26838900	2	32694300	32694400	5	4884000
1	11557700	11557800	1	8360000	8360100	1	20965200	20965300	1	20821000	20821100	1	19225500	19225600	1	13284200	13284300	3	29031700	29031800	1	13882700	13882800	2	9848000	9848100	1	17498800	17498900	12	1281800	1281900	3	1315900	1316000	4	24816900	24817000	4	9136500	9136600	3	26838900	26839000	2	32694400	32694500	5	5741000
1	11557800	11557900	1	8360100	8360200	1	20965400	20965500	1	20856400	20856500	1	19330400	19330500	1	13378200	13378300	3	29141800	29141900	1	13913700	13913800	2	9857400	9857500	1	17498900	17499000	12	1281900	1282000	3	1331500	1331600	4	25026400	25026500	4	9136600	9136700	3	26839200	26839300	2	32815800	32815900	5	6161800
1	11581000	11581100	1	8381700	8381800	1	20967500	20967600	1	20917900	20918000	1	19331500	19331600	1	13378300	13378400	3	29145700	29145800	1	13915000	13915100	2	9862500	9862600	1	17499600	17499700	12	1348700	1348800	3	1453300	1453400	4	25059600	25059700	4	9136700	9136800	3	26841600	26841700	2	33622900	33623000	5	6275900
1	11583300	11583400	1	8394000	8394100	1	20968100	20968200	1	20930000	20930100	1	19511100	19511200	1	13410700	13410800	3	29189700	29189800	1	13915100	13915200	2	9902400	9902500	1	17500800	17500900	12	2361800	2361900	3	1464300	1464400	4	25196100	25196200	4	9136800	9136900	3	26841700	26841800	2	33623000	33623100	5	6276000
1	11589300	11589400	1	8409300	8409400	1	20968900	20969000	1	20943900	20944000	1	19512100	19512200	1	13433200	13433300	3	29194900	29195000	1	13915500	13915600	2	10021400	10021500	1	17501000	17501100	12	2361900	2362000	3	1474400	1474500	4	25196200	25196300	4	9136900	9137000	3	26843400	26843500	2	33659900	33660000	5	7941100
1	11628900	11629000	1	8409900	8410000	1	20969000	20969100	1	20947300	20947400	1	19519100	19519200	1	13435500	13435600	3	29198100	29198200	1	13920500	13920600	2	10021500	10021600	1	17513800	17513900	12	2734500	2734600	3	1510500	1510600	4	25554200	25554300	4	9137000	9137100	3	26848800	26848900	2	33684700	33684800	5	7941200
1	11629000	11629100	1	8419400	8419500	1	20969800	20969900	1	20947400	20947500	1	19520200	19520300	1	13462900	13463000	3	29198200	29198300	1	13928800	13928900	2	10021800	10021900	1	17513900	17514000	12	2734600	2734700	3	1602500	1602600	4	25922900	25923000	4	9137100	9137200	3	26848900	26849000	2	34010700	34010800	5	8005400
1	11653300	11653400	1	8432900	8433000	1	20971500	20971600	1	20964500	20964600	1	19553700	19553800	1	13465800	13465900	3	29467300	29467400	1	13934300	13934400	2	10021900	10022000	1	17514100	17514200	12	3223900	3224000	3	1602800	1602900	4	26014800	26014900	4	9137200	9137300	3	26849100	26849200	2	34010900	34011000	5	8572400
1	11668100	11668200	1	8433200	8433300	1	20973800	20973900	1	20965100	20965200	1	19601100	19601200	1	13466000	13466100	3	29495900	29496000	1	13962600	13962700	2	10022000	10022100	1	17514200	17514300	12	3224000	3224100	3	1602900	1603000	4	26375300	26375400	4	9137700	9137800	3	26851400	26851500	2	34011000	34011100	5	8700700
1	11674200	11674300	1	8443400	8443500	1	20974300	20974400	1	20965200	20965300	1	19633900	19634000	1	13466100	13466200	3	29496000	29496100	1	13973400	13973500	2	10022200	10022300	1	17569800	17569900	12	3285800	3285900	3	1603700	1603800	4	26468700	26468800	4	9137800	9137900	3	26855100	26855200	2	34011100	34011200	5	9133300
1	11719200	11719300	1	8443500	8443600	1	20974400	20974500	1	20967600	20967700	1	19637700	19637800	1	13471300	13471400	3	29516400	29516500	1	13983900	13984000	2	10368400	10368500	1	17580300	17580400	12	3420200	3420300	3	1603800	1603900	4	27014800	27014900	4	9142000	9142100	3	26855200	26855300	2	34011200	34011300	5	12834400
1	11732200	11732300	1	8454500	8454600	1	20974600	20974700	1	20967900	20968000	1	19642500	19642600	1	13533900	13534000	3	29516500	29516600	1	13989600	13989700	2	10532400	10532500	1	17634500	17634600	12	3420300	3420400	3	1604200	1604300	4	27239400	27239500	4	9142900	9143000	3	26859600	26859700	2	34011300	34011400	5	12956100
1	11733600	11733700	1	8454600	8454700	1	20985200	20985300	1	20968900	20969000	1	19642600	19642700	1	13590500	13590600	3	29615400	29615500	1	13990000	13990100	2	10533400	10533500	1	17656200	17656300	12	3505400	3505500	3	1604300	1604400	4	27239700	27239800	4	9143000	9143100	3	26859700	26859800	2	34011400	34011500	5	12956200
1	11733700	11733800	1	8456400	8456500	1	20985300	20985400	1	20969000	20969100	1	19644300	19644400	1	13616700	13616800	3	29615500	29615600	1	13990100	13990200	2	10533600	10533700	1	17656900	17657000	12	4221800	4221900	3	1604400	1604500	4	27617300	27617400	4	9143100	9143200	3	26959100	26959200	2	34011900	34012000	5	12958700
1	11733800	11733900	1	8456600	8456700	1	21008800	21008900	1	20970700	20970800	1	19680100	19680200	1	13616800	13616900	3	29675600	29675700	1	13994200	13994300	2	10620200	10620300	1	17658900	17659000	12	4223600	4223700	3	1618200	1618300	4	27671700	27671800	4	9143200	9143300	3	27233600	27233700	2	34012300	34012400	5	12963000
1	11737100	11737200	1	8457800	8457900	1	21009400	21009500	1	20971500	20971600	1	19680200	19680300	1	13619800	13619900	3	29931100	29931200	1	13995100	13995200	2	10738500	10738600	1	17678500	17678600	12	4303100	4303200	3	1651200	1651300	4	28303300	28303400	4	9143300	9143400	3	27233700	27233800	2	34012500	34012600	5	12963100
1	11737200	11737300	1	8458700	8458800	1	21009500	21009600	1	20973800	20973900	1	19727100	19727200	1	13629700	13629800	3	30261500	30261600	1	14057200	14057300	2	10770600	10770700	1	17722100	17722200	12	5464800	5464900	3	1695600	1695700	4	28626000	28626100	4	9143400	9143500	3	27346200	27346300	2	34013400	34013500	5	12974700
1	11742700	11742800	1	8460800	8460900	1	21045300	21045400	1	20974600	20974700	1	19734100	19734200	1	13636700	13636800	3	30360900	30361000	1	14057300	14057400	2	11020000	11020100	1	17722200	17722300	12	5559100	5559200	3	1765000	1765100	4	28626100	28626200	4	9143500	9143600	3	27555000	27555100	2	34013900	34014000	5	12978500
1	11747500	11747600	1	8462600	8462700	1	21066300	21066400	1	20974700	20974800	1	19734200	19734300	1	13645000	13645100	3	30365600	30365700	1	14089000	14089100	2	11027500	11027600	1	17746100	17746200	12	5559300	5559400	3	2002100	2002200	4	28634700	28634800	4	9146900	9147000	3	27555400	27555500	2	34561700	34561800	5	12978600
1	11748000	11748100	1	8463000	8463100	1	21066400	21066500	1	20975600	20975700	1	19734600	19734700	1	13656700	13656800	3	30368200	30368300	1	14089100	14089200	2	11027600	11027700	1	17752500	17752600	12	5564800	5564900	3	2034300	2034400	4	28703500	28703600	4	9147100	9147200	3	27556400	27556500	2	34561800	34561900	5	13465100
1	11752100	11752200	1	8463100	8463200	1	21174400	21174500	1	20985200	20985300	1	19734700	19734800	1	13685400	13685500	3	30421000	30421100	1	14094300	14094400	2	11037700	11037800	1	17753000	17753100	12	5633700	5633800	3	2044100	2044200	4	28884100	28884200	4	9147200	9147300	3	27556500	27556600	2	34561900	34562000	5	13465200
1	11755600	11755700	1	8470200	8470300	1	21207000	21207100	1	21008600	21008700	1	19735100	19735200	1	13690200	13690300	3	30667800	30667900	1	14110800	14110900	2	11113900	11114000	1	17765100	17765200	12	5641200	5641300	3	2045900	2046000	4	28884500	28884600	4	9149400	9149500	3	27557900	27558000	2	34577500	34577600	5	14197800
1	11755700	11755800	1	8470500	8470600	1	21207400	21207500	1	21008700	21008800	1	19863400	19863500	1	13690300	13690400	3	30668000	30668100	1	14143000	14143100	2	11369400	11369500	1	17765200	17765300	12	6360500	6360600	3	2556900	2557000	4	29649600	29649700	4	9149500	9149600	3	27558000	27558100	2	34577600	34577700	5	14210400
1	11756100	11756200	1	8473300	8473400	1	21207500	21207600	1	21008800	21008900	1	19900100	19900200	1	13691000	13691100	3	30849600	30849700	1	14143800	14143900	2	11369500	11369600	1	17820000	17820100	12	6360600	6360700	3	2724500	2724600	4	29710300	29710400	4	9153700	9153800	3	27558600	27558700	2	34713300	34713400	5	14939100
1	11770300	11770400	1	8474100	8474200	1	21207800	21207900	1	21009200	21009300	1	20012300	20012400	1	13691100	13691200	3	30985300	30985400	1	14165800	14165900	2	11371700	11371800	1	17823900	17824000	12	6360700	6360800	3	2729700	2729800	4	29710400	29710500	4	9160600	9160700	3	27560000	27560100	2	34713400	34713500	5	15141500
1	11770400	11770500	1	8490200	8490300	1	21214000	21214100	1	21009300	21009400	1	20012400	20012500	1	13691300	13691400	3	31263400	31263500	1	14194500	14194600	2	11383300	11383400	1	17833000	17833100	12	6727600	6727700	3	2811400	2811500	4	30074900	30075000	4	9160900	9161000	3	27560100	27560200	2	34745300	34745400	5	15266300
1	11771300	11771400	1	8503700	8503800	1	21214600	21214700	1	21009400	21009500	1	20012500	20012600	1	13691400	13691500	3	31312200	31312300	1	14194600	14194700	2	11715200	11715300	1	17867200	17867300	12	6727700	6727800	3	2875800	2875900	4	30899600	30899700	4	9161000	9161100	3	27560200	27560300	2	34745400	34745500	5	15266400
1	11772500	11772600	1	8503800	8503900	1	21216700	21216800	1	21009500	21009600	1	20012600	20012700	1	13691500	13691600	3	31572000	31572100	1	14213900	14214000	2	12051800	12051900	1	17881400	17881500	12	6949000	6949100	3	2895900	2896000	4	31018900	31019000	4	9161100	9161200	3	27564100	27564200	2	34745500	34745600	5	15266500
1	11776400	11776500	1	8530000	8530100	1	21216800	21216900	1	21009600	21009700	1	20012700	20012800	1	13691900	13692000	3	31670900	31671000	1	14229100	14229200	2	12058200	12058300	1	17913800	17913900	12	7644500	7644600	3	2896000	2896100	4	31442700	31442800	4	9161200	9161300	3	27566900	27567000	2	34760000	34760100	5	15266700
1	11776500	11776600	1	8534000	8534100	1	21225100	21225200	1	21009700	21009800	1	20012800	20012900	1	13692300	13692400	3	31852800	31852900	1	14232800	14232900	2	12069900	12070000	1	17913900	17914000	12	8715200	8715300	3	2897100	2897200	4	31485300	31485400	4	9161900	9162000	3	27574500	27574600	2	34760100	34760200	5	15272200
1	11786100	11786200	1	8534100	8534200	1	21247600	21247700	1	21010000	21010100	1	20108700	20108800	1	13692500	13692600	3	31920600	31920700	1	14234800	14234900	2	12078600	12078700	1	17914600	17914700	12	8715300	8715400	3	3086600	3086700	4	32152900	32153000	4	9162000	9162100	3	27574600	27574700	2	35256800	35256900	5	15272600
1	11798700	11798800	1	8535000	8535100	1	21247700	21247800	1	21010100	21010200	1	20117600	20117700	1	13693100	13693200	3	32023500	32023600	1	14275700	14275800	2	12181200	12181300	1	17917200	17917300	12	8723700	8723800	3	3156300	3156400	4	32154300	32154400	4	9162100	9162200	3	27574700	27574800	2	35271300	35271400	5	15272700
1	11882100	11882200	1	8535100	8535200	1	21251500	21251600	1	21010200	21010300	1	20118000	20118100	1	13693800	13693900	3	32091500	32091600	1	14282500	14282600	2	12181300	12181400	1	17917300	17917400	12	8723800	8723900	3	3330400	3330500	4	32336700	32336800	4	9163600	9163700	3	27575500	27575600	2	35273000	35273100	5	15277500
1	11905200	11905300	1	8554100	8554200	1	21252700	21252800	1	21010400	21010500	1	20118100	20118200	1	13700000	13700100	3	32304000	32304100	1	14282800	14282900	2	12333900	12334000	1	18004200	18004300	12	8979800	8979900	3	3330500	3330600	4	32340900	32341000	4	9163700	9163800	3	27575600	27575700	2	35273600	35273700	5	15277700
1	11915900	11916000	1	8593100	8593200	1	21256300	21256400	1	21011000	21011100	1	20118200	20118300	1	13700300	13700400	3	32400100	32400200	1	14289700	14289800	2	12389100	12389200	1	18004300	18004400	12	8979900	8980000	3	3334100	3334200	4	32413500	32413600	4	9163800	9163900	3	27575700	27575800	2	35468000	35468100	5	15277900
1	11916000	11916100	1	8596300	8596400	1	21258800	21258900	1	21011100	21011200	1	20119800	20119900	1	13703200	13703300	3	32616400	32616500	1	14290100	14290200	2	12599900	12600000	1	18008100	18008200	12	9362700	9362800	3	3367500	3367600	4	32413600	32413700	4	9163900	9164000	3	27580000	27580100	2	35468100	35468200	5	15278000
1	11955700	11955800	1	8637300	8637400	1	21321300	21321400	1	21011300	21011400	1	20119900	20120000	1	13728300	13728400	3	32705900	32706000	1	14290200	14290300	2	12712900	12713000	1	18039100	18039200	12	9951400	9951500	3	3413100	3413200	4	32492400	32492500	4	9164600	9164700	3	27580300	27580400	2	35541900	35542000	5	15330500
1	11993700	11993800	1	8654900	8655000	1	21321400	21321500	1	21011800	21011900	1	20120300	20120400	1	13728400	13728500	3	32706000	32706100	1	14347900	14348000	2	12739200	12739300	1	18068600	18068700	12	10076700	10076800	3	3569500	3569600	4	32502900	32503000	4	9166900	9167000	3	27611100	27611200	2	35542000	35542100	5	15330700
1	11996600	11996700	1	8655100	8655200	1	21365000	21365100	1	21011900	21012000	1	20210700	20210800	1	13732800	13732900	3	32706100	32706200	1	14350000	14350100	2	12796600	12796700	1	18072300	18072400	12	10080600	10080700	3	3569600	3569700	4	32503000	32503100	4	9167100	9167200	3	27611400	27611500	2	35542200	35542300	5	15330900
1	11996700	11996800	1	8655500	8655600	1	21365500	21365600	1	21012000	21012100	1	20424700	20424800	1	13733200	13733300	3	32718900	32719000	1	14358500	14358600	2	12796800	12796900	1	18103700	18103800	12	10080700	10080800	3	3781500	3781600	4	32515900	32516000	4	9167200	9167300	3	27611500	27611600	2	35542300	35542400	5	15331000
1	11996800	11996900	1	8659000	8659100	1	21365700	21365800	1	21012400	21012500	1	20425300	20425400	1	13733300	13733400	3	32843100	32843200	1	14358600	14358700	2	12797100	12797200	1	18103800	18103900	12	10080900	10081000	3	3796300	3796400	4	32516000	32516100	4	9170500	9170600	3	27611600	27611700	2	35821100	35821200	5	15333000
1	11997200	11997300	1	8669900	8670000	1	21366100	21366200	1	21012500	21012600	1	20435000	20435100	1	13733400	13733500	3	32867100	32867200	1	14358700	14358800	2	12797200	12797300	1	18122700	18122800	12	10081000	10081100	3	3832700	3832800	4	32879500	32879600	4	9170600	9170700	3	27624300	27624400	2	35836000	35836100	5	15333100
1	11997300	11997400	1	8670000	8670100	1	21367200	21367300	1	21066600	21066700	1	20435100	20435200	1	13748200	13748300	3	32894500	32894600	1	14362900	14363000	2	12805200	12805300	1	18133800	18133900	12	10534700	10534800	3	3851100	3851200	4	32897500	32897600	4	9170700	9170800	3	27624400	27624500	3	287800	287900	5	15333200
1	11997900	11998000	1	8673700	8673800	1	21398600	21398700	1	21187700	21187800	1	20451900	20452000	1	13758600	13758700	3	32921200	32921300	1	14364400	14364500	2	12805700	12805800	1	18158000	18158100	12	10534800	10534900	3	3853600	3853700	4	32897600	32897700	4	9170800	9170900	3	27624700	27624800	3	416300	416400	5	15333500
1	11998000	11998100	1	8674700	8674800	1	21398900	21399000	1	21207500	21207600	1	20646400	20646500	1	13758700	13758800	3	32922900	32923000	1	14405600	14405700	2	12854600	12854700	1	18197100	18197200	12	10540200	10540300	3	4001000	4001100	4	32897700	32897800	4	9170900	9171000	3	27624800	27624900	3	425000	425100	5	15333600
1	12006100	12006200	1	8677500	8677600	1	21427700	21427800	1	21214200	21214300	1	20672400	20672500	1	13758900	13759000	3	32932700	32932800	1	14455700	14455800	2	12889600	12889700	1	18282800	18282900	12	10540300	10540400	3	4034400	4034500	4	32897800	32897900	4	9171000	9171100	3	27624900	27625000	3	461200	461300	5	15335600
1	12063900	12064000	1	8678000	8678100	1	21428000	21428100	1	21214600	21214700	1	20696700	20696800	1	13759100	13759200	3	32948000	32948100	1	14455800	14455900	2	12891700	12891800	1	18346500	18346600	12	11004500	11004600	3	4055700	4055800	4	32897900	32898000	4	9171100	9171200	3	27632300	27632400	3	461300	461400	5	15335700
1	12064000	12064100	1	8678300	8678400	1	21428100	21428200	1	21215600	21215700	1	20771300	20771400	1	13759500	13759600	3	33007700	33007800	1	14469800	14469900	2	13139400	13139500	1	18517200	18517300	12	11004600	11004700	3	4055800	4055900	4	32898000	32898100	4	9171200	9171300	3	27633900	27634000	3	461400	461500	5	15335800
1	12076400	12076500	1	8679700	8679800	1	21429100	21429200	1	21217000	21217100	1	20771400	20771500	1	13793100	13793200	3	33205100	33205200	1	14478900	14479000	2	13139500	13139600	1	18517900	18518000	12	11021400	11021500	3	4098900	4099000	4	32898100	32898200	4	9171300	9171400	3	27634000	27634100	3	461600	461700	5	15336100
1	12095600	12095700	1	8709400	8709500	1	21437900	21438000	1	21217600	21217700	1	20775000	20775100	1	13805600	13805700	3	33558800	33558900	1	14479000	14479100	2	13142700	13142800	1	18518000	18518100	12	11038900	11039000	3	4099000	4099100	4	32898500	32898600	4	9171400	9171500	3	27635700	27635800	3	461700	461800	5	15338200
1	12120600	12120700	1	8712200	8712300	1	21444500	21444600	1	21225100	21225200	1	20840500	20840600	1	13853000	13853100	3	33916300	33916400	1	14479100	14479200	2	13142800	13142900	1	18518300	18518400	12	11263200	11263300	3	4135000	4135100	4	32898800	32898900	4	9171500	9171600	3	27635800	27635900	3	624600	624700	5	15338300
1	12139100	12139200	1	8712300	8712400	1	21498000	21498100	1	21247600	21247700	1	20878300	20878400	1	13862300	13862400	3	33925500	33925600	1	14479200	14479300	2	13190800	13190900	1	18599800	18599900	12	11283600	11283700	3	4135200	4135300	4	32898900	32899000	4	9171600	9171700	3	27635900	27636000	3	1444300	1444400	5	15338700
1	12142600	12142700	1	8712400	8712500	1	21498100	21498200	1	21247700	21247800	1	20884800	20884900	1	13862600	13862700	3	34146000	34146100	1	14490100	14490200	2	13244300	13244400	1	18599900	18600000	12	11283700	11283800	3	4135300	4135400	4	32899000	32899100	4	9171700	9171800	3	27636000	27636100	3	1638000	1638100	5	15340700
1	12142700	12142800	1	8712500	8712600	1	21504300	21504400	1	21250800	21250900	1	20884900	20885000	1	13875200	13875300	3	34161400	34161500	1	14512200	14512300	2	13379300	13379400	1	18600200	18600300	12	11320800	11320900	3	4265900	4266000	4	32899100	32899200	4	9171800	9171900	3	27639900	27640000	3	1638100	1638200	5	15340800
1	12143000	12143100	1	8712600	8712700	1	21504400	21504500	1	21252700	21252800	1	20885500	20885600	1	13876100	13876200	3	34210300	34210400	1	14516500	14516600	2	13379400	13379500	1	18600400	18600500	12	12241000	12241100	3	4374600	4374700	4	32899200	32899300	4	9171900	9172000	3	27640000	27640100	3	1667200	1667300	5	15340900
1	12143100	12143200	1	8721900	8722000	1	21525600	21525700	1	21253600	21253700	1	20885700	20885800	1	13881400	13881500	3	34422100	34422200	1	14516600	14516700	2	13379600	13379700	1	18662700	18662800	12	12241100	12241200	3	4374700	4374800	4	32899300	32899400	4	9172000	9172100	3	27640100	27640200	3	1667300	1667400	5	15341200
1	12143300	12143400	1	8727000	8727100	1	21566100	21566200	1	21256300	21256400	1	20894900	20895000	1	13883800	13883900	3	34422200	34422300	1	14526300	14526400	2	13379700	13379800	1	18662800	18662900	12	15191200	15191300	3	4580800	4580900	4	32927200	32927300	4	9172500	9172600	3	27641000	27641100	3	1691700	1691800	5	15343300
1	12143400	12143500	1	8727100	8727200	1	21566900	21567000	1	21256900	21257000	1	20895000	20895100	1	13915000	13915100	3	34549800	34549900	1	14677900	14678000	2	13392600	13392700	1	18814400	18814500	12	15661700	15661800	3	4737400	4737500	4	32927300	32927400	4	9173100	9173200	3	27641200	27641300	3	1715800	1715900	5	15343400
1	12183700	12183800	1	8727400	8727500	1	21567000	21567100	1	21257000	21257100	1	20903100	20903200	1	13932500	13932600	3	34549900	34550000	1	14678000	14678100	2	13392700	13392800	1	18814500	18814600	12	16853400	16853500	3	4737600	4737700	4	32927400	32927500	4	9174100	9174200	3	27641900	27642000	3	1807800	1807900	5	15343500
1	12190500	12190600	1	8727600	8727700	1	21575700	21575800	1	21314600	21314700	1	20903800	20903900	1	13932700	13932800	3	34578100	34578200	1	14678200	14678300	2	13393300	13393400	1	18864800	18864900	12	17002700	17002800	3	4752300	4752400	4	32927500	32927600	4	9174200	9174300	3	27642000	27642100	3	1808200	1808300	5	15343700
1	12190600	12190700	1	8749700	8749800	1	21575900	21576000	1	21314700	21314800	1	20903900	20904000	1	13932800	13932900	3	34592700	34592800	1	14678300	14678400	2	13393600	13393700	1	18898700	18898800	12	17341200	17341300	3	4752400	4752500	4	32927600	32927700	4	9174600	9174700	3	27904500	27904600	3	1808300	1808400	5	15372600
1	12218500	12218600	1	8795200	8795300	1	21576200	21576300	1	21365500	21365600	1	20904000	20904100	1	13946600	13946700	3	34592800	34592900	1	14681100	14681200	2	13394200	13394300	1	18906800	18906900	12	18493600	18493700	3	4892700	4892800	4	32927700	32927800	4	9175300	9175400	3	28036100	28036200	3	1809100	1809200	5	15372800
1	12219500	12219600	1	8799000	8799100	1	21576700	21576800	1	21365600	21365700	1	20914200	20914300	1	13947400	13947500	3	34592900	34593000	1	14702000	14702100	2	13394400	13394500	1	18906900	18907000	12	19451800	19451900	3	4892800	4892900	4	32927800	32927900	4	9175400	9175500	3	28601200	28601300	3	1809200	1809300	5	15384800
1	12273700	12273800	1	8803600	8803700	1	21576800	21576900	1	21365700	21365800	1	20998000	20998100	1	13947500	13947600	3	34696700	34696800	1	14780600	14780700	2	13394500	13394600	1	18910400	18910500	12	19748700	19748800	3	5017200	5017300	4	32927900	32928000	4	9176200	9176300	3	28601400	28601500	3	1809400	1809500	5	15384900
1	12274100	12274200	1	8814100	8814200	1	21608900	21609000	1	21365800	21365900	1	20998100	20998200	1	13947700	13947800	3	35232700	35232800	1	14780700	14780800	2	13394600	13394700	1	18918600	18918700	12	20104200	20104300	3	5139300	5139400	4	32928000	32928100	4	9176300	9176400	3	28854600	28854700	3	1809800	1809900	5	15385000
1	12274200	12274300	1	8818600	8818700	1	21635700	21635800	1	21367200	21367300	1	21092000	21092100	1	13962600	13962700	3	35232800	35232900	1	14797700	14797800	2	13433600	13433700	1	18939700	18939800	12	21281400	21281500	3	5156900	5157000	4	32928100	32928200	4	9176400	9176500	3	28854700	28854800	3	1810500	1810600	5	15385300
1	12278500	12278600	1	8831600	8831700	1	21645900	21646000	1	21368400	21368500	1	21092100	21092200	1	13973400	13973500	3	35272100	35272200	1	14797800	14797900	2	13433700	13433800	1	18946300	18946400	12	21737300	21737400	3	5218100	5218200	4	32928200	32928300	4	9176700	9176800	3	29382500	29382600	3	1810700	1810800	5	15385400
1	12281900	12282000	1	8835200	8835300	1	21648100	21648200	1	21374600	21374700	1	21092300	21092400	1	13989600	13989700	3	35344500	35344600	1	14798000	14798100	2	13443100	13443200	1	18957700	18957800	12	21737400	21737500	3	5339400	5339500	4	32946900	32947000	4	9176900	9177000	3	29382600	29382700	3	1810800	1810900	5	15398500
1	12293500	12293600	1	8854800	8854900	1	21648700	21648800	1	21375300	21375400	1	21174400	21174500	1	13990000	13990100	3	35344600	35344700	1	14798100	14798200	2	13580800	13580900	1	19000100	19000200	12	22058700	22058800	3	5368500	5368600	4	33060400	33060500	4	9177200	9177300	3	29935100	29935200	3	1892300	1892400	5	15398900
1	12311000	12311100	1	8861300	8861400	1	21649300	21649400	1	21375700	21375800	1	21271500	21271600	1	13990100	13990200	3	35359600	35359700	1	14809300	14809400	2	13582300	13582400	1	19022900	19023000	12	22206600	22206700	3	5370100	5370200	4	33060500	33060600	4	9177500	9177600	3	31179800	31179900	3	1911400	1911500	5	15399000
1	12316400	12316500	1	8886100	8886200	1	21649500	21649600	1	21398600	21398700	1	21271600	21271700	1	14026000	14026100	3	35420800	35420900	1	14839000	14839100	2	13582400	13582500	1	19023000	19023100	12	22212000	22212100	3	5449600	5449700	4	33957100	33957200	4	9177700	9177800	3	31179900	31180000	3	1911600	1911700	5	15401100
1	12318800	12318900	1	8886200	8886300	1	21650500	21650600	1	21398900	21399000	1	21319100	21319200	1	14026100	14026200	3	35618200	35618300	1	14884900	14885000	2	13582600	13582700	1	19040200	19040300	12	22212100	22212200	3	5504300	5504400	4	33957200	33957300	4	9178000	9178100	3	31180000	31180100	3	1911700	1911800	5	15401200
1	12318900	12319000	1	8908900	8909000	1	21654800	21654900	1	21399000	21399100	1	21324300	21324400	1	14029300	14029400	3	35618300	35618400	1	14890000	14890100	2	13582700	13582800	1	19055100	19055200	12	22800200	22800300	3	5636300	5636400	4	33960800	33960900	4	9178100	9178200	3	31180100	31180200	3	1911900	1912000	5	15458500
1	12359800	12359900	1	8911500	8911600	1	21654900	21655000	1	21399100	21399200	1	21331400	21331500	1	14075300	14075400	3	35706300	35706400	1	14894200	14894300	2	13582800	13582900	1	19106200	19106300	12	22912600	22912700	3	5636400	5636500	4	33962100	33962200	4	9178400	9178500	3	31180300	31180400	3	1912000	1912100	5	15458600
1	12391300	12391400	1	8930200	8930300	1	21655200	21655300	1	21399400	21399500	1	21331600	21331700	1	14089200	14089300	3	35706400	35706500	1	14894300	14894400	2	13583000	13583100	1	19106300	19106400	12	22917400	22917500	3	5691100	5691200	4	33963200	33963300	4	9178500	9178600	3	31180600	31180700	3	1912100	1912200	5	15464500
1	12401700	12401800	1	8937900	8938000	1	21655600	21655700	1	21399800	21399900	1	21331700	21331800	1	14094000	14094100	3	35946500	35946600	1	14894400	14894500	2	13583100	13583200	1	19134900	19135000	12	23088000	23088100	3	5715300	5715400	4	34764100	34764200	4	9178700	9178800	3	31180800	31180900	3	1912600	1912700	5	15464600
1	12531000	12531100	1	8953000	8953100	1	21684800	21684900	1	21400600	21400700	1	21398900	21399000	1	14094100	14094200	3	35946600	35946700	1	14934800	14934900	2	13583300	13583400	1	19154800	19154900	12	23441900	23442000	3	5715400	5715500	4	34764200	34764300	4	9178900	9179000	3	31180900	31181000	3	1913000	1913100	5	15464900
1	12550500	12550600	1	8960200	8960300	1	21690200	21690300	1	21400700	21400800	1	21566100	21566200	1	14094500	14094600	3	36030800	36030900	1	14995300	14995400	2	13583400	13583500	1	19172000	19172100	12	25034000	25034100	3	5715500	5715600	4	35494000	35494100	4	9179000	9179100	3	31181400	31181500	3	1913200	1913300	5	15465000
1	12559800	12559900	1	8971800	8971900	1	21690300	21690400	1	21444500	21444600	1	21566900	21567000	1	14159100	14159200	3	36191500	36191600	1	14995400	14995500	2	13583500	13583600	1	19177300	19177400	12	25230900	25231000	3	5715600	5715700	5	406100	406200	4	9179700	9179800	3	31181600	31181700	3	1913300	1913400	5	15502500
1	12622200	12622300	1	9001600	9001700	1	21717200	21717300	1	21504300	21504400	1	21567000	21567100	1	14178000	14178100	3	36372100	36372200	1	15017000	15017100	2	13583600	13583700	1	19193900	19194000	12	25231000	25231100	3	5821400	5821500	5	682300	682400	4	9179800	9179900	3	31181900	31182000	3	1914100	1914200	5	15502700
1	12634000	12634100	1	9001700	9001800	1	21717300	21717400	1	21504400	21504500	1	21614700	21614800	1	14178500	14178600	4	187000	187100	1	15017100	15017200	2	13583700	13583800	1	19194100	19194200	12	25434100	25434200	3	5821500	5821600	5	915100	915200	4	9180300	9180400	3	31182000	31182100	3	1914200	1914300	5	15502800
1	12673100	12673200	1	9008400	9008500	1	21734500	21734600	1	21573100	21573200	1	21769000	21769100	1	14189100	14189200	4	187100	187200	1	15017200	15017300	2	13583800	13583900	1	19195200	19195300	12	25434200	25434300	3	5821600	5821700	5	915200	915300	4	9180400	9180500	3	31182100	31182200	3	1914600	1914700	5	15502900
1	12673300	12673400	1	9017200	9017300	1	21854700	21854800	1	21576200	21576300	1	21804800	21804900	1	14194500	14194600	4	576700	576800	1	15017300	15017400	2	13583900	13584000	1	19195300	19195400	12	25434300	25434400	3	5866500	5866600	5	915300	915400	4	9180900	9181000	3	31182200	31182300	3	2139300	2139400	5	15512700
1	12682000	12682100	1	9024300	9024400	1	21873100	21873200	1	21576300	21576400	1	21823000	21823100	1	14287900	14288000	4	637700	637800	1	15064800	15064900	2	13584000	13584100	1	19203000	19203100	12	25439500	25439600	3	5867100	5867200	5	915400	915500	4	9182500	9182600	3	31182400	31182500	3	2139400	2139500	5	15512800
1	12682100	12682200	1	9024400	9024500	1	21937200	21937300	1	21576700	21576800	1	21823100	21823200	1	14288000	14288100	4	719600	719700	1	15071000	15071100	2	13584100	13584200	1	19203400	19203500	12	25439600	25439700	3	6100600	6100700	5	915500	915600	4	9183100	9183200	3	31182900	31183000	3	2143500	2143600	5	15512900
1	12696700	12696800	1	9029200	9029300	1	21964000	21964100	1	21576800	21576900	1	21824400	21824500	1	14347900	14348000	4	943900	944000	1	15071500	15071600	2	13584200	13584300	1	19203500	19203600	12	25439700	25439800	3	6111500	6111600	5	915600	915700	4	9183200	9183300	3	31183000	31183100	3	2144700	2144800	5	15513000
1	12696800	12696900	1	9030600	9030700	1	22005200	22005300	1	21576900	21577000	1	21865700	21865800	1	14350000	14350100	4	944100	944200	1	15071600	15071700	2	13584400	13584500	1	19248400	19248500	12	25439800	25439900	3	6155400	6155500	5	915700	915800	4	9183600	9183700	3	31183500	31183600	3	2166400	2166500	5	15513100
1	12709900	12710000	1	9034100	9034200	1	22092900	22093000	1	21577200	21577300	1	21866200	21866300	1	14364400	14364500	4	961600	961700	1	15100400	15100500	2	13584500	13584600	1	19395200	19395300	12	25446800	25446900	3	6156400	6156500	5	915900	916000	4	9183700	9183800	3	31183700	31183800	3	2320500	2320600	5	15524700
1	12718000	12718100	1	9034200	9034300	1	22104400	22104500	1	21593700	21593800	1	21866600	21866700	1	14364500	14364600	4	997000	997100	1	15111300	15111400	2	13584700	13584800	1	19479500	19479600	12	25474800	25474900	3	6165700	6165800	5	916000	916100	4	9198700	9198800	3	31184000	31184100	3	2321100	2321200	5	15524800
1	12718100	12718200	1	9035200	9035300	1	22269900	22270000	1	21600500	21600600	1	21989500	21989600	1	14364600	14364700	4	1153500	1153600	1	15155600	15155700	2	13584800	13584900	1	19519000	19519100	12	25476800	25476900	3	6182700	6182800	5	916100	916200	4	9198800	9198900	3	31184100	31184200	3	2322300	2322400	5	15524900
1	12731600	12731700	1	9035300	9035400	1	22305100	22305200	1	21635700	21635800	1	22031700	22031800	1	14367300	14367400	4	1153600	1153700	1	15173000	15173100	2	13584900	13585000	1	19633200	19633300	12	25835200	25835300	3	6471500	6471600	5	916200	916300	4	9199000	9199100	3	31184200	31184300	3	2322400	2322500	5	15530400
1	12745800	12745900	1	9040100	9040200	1	22329100	22329200	1	21648100	21648200	1	22054900	22055000	1	14367400	14367500	4	1198500	1198600	1	15174500	15174600	2	13585100	13585200	1	19633800	19633900	12	25882800	25882900	3	6504400	6504500	5	916300	916400	4	9202400	9202500	3	31184300	31184400	3	2323000	2323100	5	15530700
1	12761000	12761100	1	9040200	9040300	1	22335900	22336000	1	21648400	21648500	1	22073600	22073700	1	14367700	14367800	4	1248000	1248100	1	15176200	15176300	2	13585200	13585300	1	19634300	19634400	12	26466800	26466900	3	6513600	6513700	5	916400	916500	4	9202500	9202600	3	31184500	31184600	3	2607600	2607700	5	15550500
1	12762000	12762100	1	9040300	9040400	1	22337000	22337100	1	21648500	21648600	1	22188600	22188700	1	14373700	14373800	4	1272100	1272200	1	15179300	15179400	2	13585300	13585400	1	19706100	19706200	12	27006900	27007000	3	6532000	6532100	5	1197200	1197300	4	9202600	9202700	3	31184800	31184900	3	2972300	2972400	5	16361500
1	12772100	12772200	1	9040500	9040600	1	22345100	22345200	1	21649300	21649400	1	22232500	22232600	1	14373800	14373900	4	1356400	1356500	1	15179400	15179500	2	13585400	13585500	1	19706200	19706300	12	27007000	27007100	3	6532100	6532200	5	1612300	1612400	4	9202700	9202800	3	31185000	31185100	3	2972400	2972500	5	17137500
1	12885800	12885900	1	9040600	9040700	1	22375000	22375100	1	21649500	21649600	1	22233100	22233200	1	14374100	14374200	4	1365900	1366000	1	15184500	15184600	2	13585500	13585600	1	19706300	19706400	12	27162100	27162200	3	6562900	6563000	5	1922200	1922300	4	9202800	9202900	3	31185100	31185200	3	2987700	2987800	5	17697100
1	12887200	12887300	1	9040900	9041000	1	22401100	22401200	1	21649600	21649700	1	22233200	22233300	1	14374200	14374300	4	1765100	1765200	1	15184600	15184700	2	13585600	13585700	1	19739500	19739600	12	27163400	27163500	3	6706400	6706500	5	2107400	2107500	4	9202900	9203000	3	31185600	31185700	3	2987800	2987900	5	17853400
1	12891800	12891900	1	9042900	9043000	1	22401500	22401600	1	21651200	21651300	1	22309100	22309200	1	14374600	14374700	4	1769200	1769300	1	15184900	15185000	2	13585700	13585800	1	19799900	19800000	12	27242900	27243000	3	6739000	6739100	5	2472100	2472200	4	9203000	9203100	3	31185800	31185900	3	3124600	3124700	5	17945700
1	12926600	12926700	1	9043300	9043400	1	22442100	22442200	1	21652000	21652100	1	22310100	22310200	1	14374700	14374800	4	1769300	1769400	1	15198800	15198900	2	13585800	13585900	1	19800500	19800600				3	6771300	6771400	5	3011400	3011500	4	9203100	9203200	3	31186100	31186200	3	3677200	3677300	5	17945800
1	12938900	12939000	1	9043900	9044000	1	22442400	22442500	1	21734600	21734700	1	22375000	22375100	1	14455700	14455800	4	2044500	2044600	1	15269000	15269100	2	13585900	13586000	1	19800900	19801000				3	6788800	6788900	5	3581600	3581700	4	9203200	9203300	3	31186200	31186300	3	3746900	3747000	5	18416800
1	12940600	12940700	1	9045500	9045600	1	22479600	22479700	1	21805000	21805100	1	22426300	22426400	1	14459100	14459200	4	2044900	2045000	1	15269800	15269900	2	13586000	13586100	1	19801000	19801100				3	6829200	6829300	5	3669400	3669500	4	9203300	9203400	3	31186300	31186400	3	3747200	3747300	5	19406300
1	12986300	12986400	1	9049300	9049400	1	22479900	22480000	1	21805100	21805200	1	22462300	22462400	1	14479100	14479200	4	2045000	2045100	1	15288900	15289000	2	13900100	13900200	1	19900200	19900300				3	6923300	6923400	5	3871900	3872000	4	9203400	9203500	3	31186400	31186500	3	3747300	3747400	5	19406400
1	13031500	13031600	1	9054700	9054800	1	22502400	22502500	1	21824300	21824400	1	22521900	22522000	1	14479200	14479300	4	2337900	2338000	1	15289600	15289700	2	14336400	14336500	1	19910100	19910200				3	6945200	6945300	5	3876500	3876600	4	9203500	9203600	3	31186600	31186700	3	3747400	3747500	5	19474400
1	13041700	13041800	1	9062100	9062200	1	22521700	22521800	1	21824400	21824500	1	22655700	22655800	1	14490100	14490200	4	2338400	2338500	1	15365300	15365400	2	14362300	14362400	1	19910200	19910300				3	7469400	7469500	5	3876800	3876900	4	9203600	9203700	3	31186800	31186900	3	3747500	3747600	5	19474500
1	13064600	13064700	1	9071800	9071900	1	22521900	22522000	1	21866500	21866600	1	22710600	22710700	1	14501600	14501700	4	2406200	2406300	1	15392800	15392900	2	14364200	14364300	1	19978100	19978200				3	7603900	7604000	5	3877100	3877200	4	9203700	9203800	3	31186900	31187000	3	3747600	3747700	5	19716900
1	13064700	13064800	1	9071900	9072000	1	22523100	22523200	1	21866600	21866700	1	22751700	22751800	1	14501700	14501800	4	2406300	2406400	1	15401800	15401900	2	14730700	14730800	1	19984300	19984400				3	7871200	7871300	5	3893200	3893300	4	9203800	9203900	3	31187100	31187200	3	4455500	4455600	5	19718500
1	13064800	13064900	1	9072000	9072100	1	22541400	22541500	1	21873100	21873200	1	22763200	22763300	1	14534200	14534300	4	2757900	2758000	1	15421300	15421400	2	14824200	14824300	1	20046600	20046700				3	7981900	7982000	5	3893300	3893400	4	9203900	9204000	3	31187200	31187300	3	4455600	4455700	5	19718600
1	13064900	13065000	1	9072100	9072200	1	22610400	22610500	1	22111400	22111500	1	22765500	22765600	1	14575800	14575900	4	2889500	2889600	1	15426400	15426500	2	14826600	14826700	1	20048100	20048200				3	8094300	8094400	5	3893400	3893500	4	9204200	9204300	3	31187700	31187800	3	4456700	4456800	5	19718700
1	13065000	13065100	1	9084100	9084200	1	22638700	22638800	1	22269900	22270000	1	22765600	22765700	1	14596300	14596400	4	3112900	3113000	1	15444100	15444200	2	14826700	14826800	1	20294700	20294800				3	8098600	8098700	5	3893500	3893600	4	9204400	9204500	3	31187900	31188000	3	4456800	4456900	5	19718900
[truncated: 44,724 more rows]
[truncated: 22 more columns]
