# Supplementary material for: Plant polymerase IV sensitizes chromatin through histone modifications to preclude spread of silencing into protein-coding domains
Source: HighWire-hosted journal article supplement (doi:10.1101/gr.277353.122), 2023-05-01
Supplement: Supplemental_Table_S7.xlsx [file Supplemental_Table_S7.xlsx]

## Sheet: Sheet1
Supplemental_Table_S7: Bed co-ordinates of pol IV dependent and suppressed sRNA 100bp bins identified in Arabidopsis tissues.
Inflorescence						Seedlings						Inflorescence						Seedlings
21-22nt sRNA clusters - downregulated			23-24nt sRNA clusters - downregulated			21-22nt sRNA clusters - downregulated			23-24nt sRNA clusters - downregulated			21-22nt sRNA clusters – upregulated			23-24nt sRNA clusters – upregulated			21-22nt sRNA clusters – upregulated			23-24nt sRNA clusters – upregulated
chr	start	end	chr	start	end	chr	start	end	chr	start	end	chr	start	end	chr	start	end	chr	start	end	chr	start	end
Chr1	44700	44800	Chr1	18100	18200	Chr1	78900	79000	Chr1	0	100	Chr1	79000	79100	Chr1	78900	79000	Chr1	1647000	1647100	Chr1	78900	79000
Chr1	77300	77400	Chr1	18200	18300	Chr1	79000	79100	Chr1	700	800	Chr1	1215700	1215800	Chr1	79000	79100	Chr1	7423500	7423600	Chr1	79000	79100
Chr1	78900	79000	Chr1	18300	18400	Chr1	258500	258600	Chr1	800	900	Chr1	2111000	2111100	Chr1	111800	111900	Chr1	7423600	7423700	Chr1	309200	309300
Chr1	258100	258200	Chr1	18400	18500	Chr1	433100	433200	Chr1	17000	17100	Chr1	2177800	2177900	Chr1	111900	112000	Chr1	10227100	10227200	Chr1	515400	515500
Chr1	258200	258300	Chr1	56500	56600	Chr1	552600	552700	Chr1	17200	17300	Chr1	2177900	2178000	Chr1	306400	306500	Chr1	16766300	16766400	Chr1	515500	515600
Chr1	258400	258500	Chr1	77300	77400	Chr1	587500	587600	Chr1	17900	18000	Chr1	2406900	2407000	Chr1	309200	309300	Chr1	23308000	23308100	Chr1	552600	552700
Chr1	292200	292300	Chr1	77400	77500	Chr1	587600	587700	Chr1	18300	18400	Chr1	3469600	3469700	Chr1	309300	309400	Chr1	23385900	23386000	Chr1	604400	604500
Chr1	292300	292400	Chr1	238500	238600	Chr1	758600	758700	Chr1	44700	44800	Chr1	4006900	4007000	Chr1	420600	420700	Chr1	23389200	23389300	Chr1	608500	608600
Chr1	292400	292500	Chr1	257700	257800	Chr1	758700	758800	Chr1	55700	55800	Chr1	4842400	4842500	Chr1	513000	513100	Chr1	23414400	23414500	Chr1	608600	608700
Chr1	423700	423800	Chr1	257800	257900	Chr1	1430300	1430400	Chr1	56500	56600	Chr1	5298000	5298100	Chr1	515400	515500	Chr1	23489200	23489300	Chr1	753700	753800
Chr1	424100	424200	Chr1	258000	258100	Chr1	1653500	1653600	Chr1	77300	77400	Chr1	5298100	5298200	Chr1	515500	515600	Chr1	23508800	23508900	Chr1	892500	892600
Chr1	431400	431500	Chr1	258100	258200	Chr1	2014900	2015000	Chr1	77400	77500	Chr1	7065800	7065900	Chr1	552600	552700	Chr1	23508900	23509000	Chr1	899300	899400
Chr1	431900	432000	Chr1	258200	258300	Chr1	2025300	2025400	Chr1	257700	257800	Chr1	7065900	7066000	Chr1	552700	552800	Chr1	29016700	29016800	Chr1	899400	899500
Chr1	433100	433200	Chr1	258300	258400	Chr1	2107300	2107400	Chr1	257800	257900	Chr1	11503500	11503600	Chr1	599500	599600	Chr1	29016800	29016900	Chr1	909800	909900
Chr1	433200	433300	Chr1	258400	258500	Chr1	2334800	2334900	Chr1	257900	258000	Chr1	11685300	11685400	Chr1	604400	604500	Chr2	3300	3400	Chr1	1159000	1159100
Chr1	433300	433400	Chr1	258500	258600	Chr1	2340200	2340300	Chr1	258000	258100	Chr1	12673100	12673200	Chr1	608400	608500	Chr2	3400	3500	Chr1	1190200	1190300
Chr1	433400	433500	Chr1	292200	292300	Chr1	2406800	2406900	Chr1	258100	258200	Chr1	15547200	15547300	Chr1	635300	635400	Chr2	3500	3600	Chr1	1215700	1215800
Chr1	447000	447100	Chr1	292300	292400	Chr1	2406900	2407000	Chr1	258200	258300	Chr1	17690100	17690200	Chr1	875200	875300	Chr2	771400	771500	Chr1	1431500	1431600
Chr1	447200	447300	Chr1	292400	292500	Chr1	2538100	2538200	Chr1	258300	258400	Chr1	17891300	17891400	Chr1	875500	875600	Chr2	771500	771600	Chr1	1727400	1727500
Chr1	500000	500100	Chr1	423700	423800	Chr1	2538200	2538300	Chr1	258400	258500	Chr1	17891400	17891500	Chr1	877600	877700	Chr2	1040900	1041000	Chr1	1817400	1817500
Chr1	500100	500200	Chr1	424100	424200	Chr1	2587300	2587400	Chr1	258500	258600	Chr1	18026800	18026900	Chr1	877700	877800	Chr2	3187100	3187200	Chr1	1962200	1962300
Chr1	515500	515600	Chr1	431400	431500	Chr1	2795100	2795200	Chr1	292400	292500	Chr1	18388800	18388900	Chr1	892500	892600	Chr2	3496000	3496100	Chr1	2025300	2025400
Chr1	552600	552700	Chr1	431900	432000	Chr1	2800600	2800700	Chr1	423500	423600	Chr1	19847900	19848000	Chr1	909800	909900	Chr2	6390300	6390400	Chr1	2047900	2048000
Chr1	587500	587600	Chr1	432000	432100	Chr1	3023600	3023700	Chr1	423600	423700	Chr1	19848000	19848100	Chr1	937200	937300	Chr2	6390400	6390500	Chr1	2048000	2048100
Chr1	587600	587700	Chr1	433000	433100	Chr1	3180600	3180700	Chr1	423700	423800	Chr1	20039400	20039500	Chr1	937300	937400	Chr2	6892600	6892700	Chr1	2048100	2048200
Chr1	670600	670700	Chr1	433100	433200	Chr1	3251300	3251400	Chr1	424000	424100	Chr1	22603200	22603300	Chr1	1008800	1008900	Chr2	7191300	7191400	Chr1	2048300	2048400
Chr1	670700	670800	Chr1	433200	433300	Chr1	3469600	3469700	Chr1	424100	424200	Chr1	22795600	22795700	Chr1	1009100	1009200	Chr3	343600	343700	Chr1	2048400	2048500
Chr1	670800	670900	Chr1	433300	433400	Chr1	3469800	3469900	Chr1	431300	431400	Chr1	23389200	23389300	Chr1	1159000	1159100	Chr3	343700	343800	Chr1	2049100	2049200
Chr1	696500	696600	Chr1	433600	433700	Chr1	3933200	3933300	Chr1	431900	432000	Chr1	23414400	23414500	Chr1	1215700	1215800	Chr3	1959800	1959900	Chr1	2049200	2049300
Chr1	696600	696700	Chr1	447000	447100	Chr1	4110100	4110200	Chr1	433000	433100	Chr1	24190800	24190900	Chr1	1324900	1325000	Chr3	1959900	1960000	Chr1	2107300	2107400
Chr1	758600	758700	Chr1	447200	447300	Chr1	4110900	4111000	Chr1	433100	433200	Chr1	24884300	24884400	Chr1	1357500	1357600	Chr3	1966000	1966100	Chr1	2107400	2107500
Chr1	758700	758800	Chr1	447300	447400	Chr1	4182100	4182200	Chr1	433200	433300	Chr1	24884400	24884500	Chr1	1727100	1727200	Chr3	2842700	2842800	Chr1	2111000	2111100
Chr1	759000	759100	Chr1	499500	499600	Chr1	4209500	4209600	Chr1	433700	433800	Chr1	26429700	26429800	Chr1	1727200	1727300	Chr3	3366400	3366500	Chr1	2111100	2111200
Chr1	781500	781600	Chr1	500000	500100	Chr1	4267000	4267100	Chr1	499500	499600	Chr1	26891600	26891700	Chr1	1727300	1727400	Chr3	7104600	7104700	Chr1	2111200	2111300
Chr1	889000	889100	Chr1	500100	500200	Chr1	4368900	4369000	Chr1	499600	499700	Chr1	27713200	27713300	Chr1	1727400	1727500	Chr3	11482000	11482100	Chr1	2156300	2156400
Chr1	889200	889300	Chr1	500400	500500	Chr1	4369000	4369100	Chr1	499900	500000	Chr1	27984800	27984900	Chr1	1817300	1817400	Chr3	11482700	11482800	Chr1	2334800	2334900
Chr1	909800	909900	Chr1	500500	500600	Chr1	4583400	4583500	Chr1	500000	500100	Chr1	29427900	29428000	Chr1	1817400	1817500	Chr3	11482800	11482900	Chr1	2338900	2339000
Chr1	1159000	1159100	Chr1	500700	500800	Chr1	4786400	4786500	Chr1	500100	500200	Chr1	29911600	29911700	Chr1	1978000	1978100	Chr3	14197300	14197400	Chr1	2339200	2339300
Chr1	1160200	1160300	Chr1	500800	500900	Chr1	4842300	4842400	Chr1	500400	500500	Chr2	3200	3300	Chr1	1978100	1978200	Chr3	14197500	14197600	Chr1	2339300	2339400
Chr1	1195000	1195100	Chr1	512700	512800	Chr1	5171900	5172000	Chr1	500500	500600	Chr2	3300	3400	Chr1	2025300	2025400	Chr3	16151300	16151400	Chr1	2341500	2341600
Chr1	1249900	1250000	Chr1	512900	513000	Chr1	5297800	5297900	Chr1	500700	500800	Chr2	3400	3500	Chr1	2025400	2025500	Chr3	16241300	16241400	Chr1	2341600	2341700
Chr1	1250100	1250200	Chr1	540900	541000	Chr1	5297900	5298000	Chr1	500800	500900	Chr2	3500	3600	Chr1	2107300	2107400	Chr3	19073400	19073500	Chr1	2341700	2341800
Chr1	1289400	1289500	Chr1	550600	550700	Chr1	5659100	5659200	Chr1	501000	501100	Chr2	5300	5400	Chr1	2107400	2107500	Chr4	2184300	2184400	Chr1	2341800	2341900
Chr1	1430200	1430300	Chr1	587500	587600	Chr1	5659200	5659300	Chr1	501200	501300	Chr2	9400	9500	Chr1	2111000	2111100	Chr4	6787100	6787200	Chr1	2406800	2406900
Chr1	1430300	1430400	Chr1	587600	587700	Chr1	5758400	5758500	Chr1	501300	501400	Chr2	9500	9600	Chr1	2111100	2111200	Chr4	10578700	10578800	Chr1	2406900	2407000
Chr1	1430800	1430900	Chr1	670600	670700	Chr1	6075900	6076000	Chr1	512700	512800	Chr2	58100	58200	Chr1	2111200	2111300	Chr4	16921000	16921100	Chr1	2438000	2438100
Chr1	1430900	1431000	Chr1	670700	670800	Chr1	6158700	6158800	Chr1	512900	513000	Chr2	771400	771500	Chr1	2156300	2156400	Chr5	5461600	5461700	Chr1	2455600	2455700
Chr1	1593100	1593200	Chr1	696500	696600	Chr1	6218600	6218700	Chr1	513000	513100	Chr2	771500	771600	Chr1	2165600	2165700	Chr5	5461700	5461800	Chr1	2455700	2455800
Chr1	1653500	1653600	Chr1	696600	696700	Chr1	6218700	6218800	Chr1	513100	513200	Chr2	853000	853100	Chr1	2177800	2177900	Chr5	9023200	9023300	Chr1	2455800	2455900
Chr1	1817400	1817500	Chr1	758600	758700	Chr1	6220800	6220900	Chr1	549700	549800	Chr2	3452000	3452100	Chr1	2177900	2178000	Chr5	9136200	9136300	Chr1	2456400	2456500
Chr1	1975400	1975500	Chr1	758700	758800	Chr1	6235000	6235100	Chr1	550400	550500	Chr2	3452100	3452200	Chr1	2228000	2228100	Chr5	10019400	10019500	Chr1	2456500	2456600
Chr1	1975900	1976000	Chr1	759000	759100	Chr1	6470400	6470500	Chr1	550600	550700	Chr2	3452900	3453000	Chr1	2334800	2334900	Chr5	10019500	10019600	Chr1	2456700	2456800
Chr1	2107300	2107400	Chr1	759100	759200	Chr1	6538600	6538700	Chr1	587500	587600	Chr2	3489400	3489500	Chr1	2406800	2406900	Chr5	15557000	15557100	Chr1	2459100	2459200
Chr1	2107400	2107500	Chr1	781500	781600	Chr1	6709100	6709200	Chr1	587600	587700	Chr2	4222200	4222300	Chr1	2406900	2407000	Chr5	16660500	16660600	Chr1	2459200	2459300
Chr1	2111100	2111200	Chr1	781800	781900	Chr1	6718000	6718100	Chr1	634300	634400	Chr2	5885200	5885300	Chr1	2455600	2455700	Chr5	21161500	21161600	Chr1	2460100	2460200
Chr1	2406800	2406900	Chr1	889000	889100	Chr1	6720800	6720900	Chr1	670600	670700	Chr2	6109000	6109100	Chr1	2455700	2455800	Chr5	26411600	26411700	Chr1	2460200	2460300
Chr1	2538100	2538200	Chr1	889200	889300	Chr1	6722900	6723000	Chr1	696500	696600	Chr2	6113700	6113800	Chr1	2455900	2456000				Chr1	2463500	2463600
Chr1	2538200	2538300	Chr1	1194600	1194700	Chr1	6723000	6723100	Chr1	696600	696700	Chr2	6892600	6892700	Chr1	2456700	2456800				Chr1	2463600	2463700
Chr1	2587300	2587400	Chr1	1249900	1250000	Chr1	6906200	6906300	Chr1	697300	697400	Chr2	7191300	7191400	Chr1	2459100	2459200				Chr1	2463700	2463800
Chr1	2879300	2879400	Chr1	1250100	1250200	Chr1	6926800	6926900	Chr1	758600	758700	Chr2	7191400	7191500	Chr1	2459300	2459400				Chr1	2464500	2464600
Chr1	3180500	3180600	Chr1	1250500	1250600	Chr1	7282300	7282400	Chr1	758700	758800	Chr2	7191500	7191600	Chr1	2459400	2459500				Chr1	2464600	2464700
Chr1	3180600	3180700	Chr1	1276100	1276200	Chr1	7353000	7353100	Chr1	759000	759100	Chr2	8802200	8802300	Chr1	2459600	2459700				Chr1	2538100	2538200
Chr1	3251300	3251400	Chr1	1276500	1276600	Chr1	7725300	7725400	Chr1	759800	759900	Chr2	10470300	10470400	Chr1	2460100	2460200				Chr1	2538200	2538300
Chr1	3413000	3413100	Chr1	1289000	1289100	Chr1	7761200	7761300	Chr1	759900	760000	Chr2	12975800	12975900	Chr1	2463600	2463700				Chr1	2588500	2588600
Chr1	3414100	3414200	Chr1	1289400	1289500	Chr1	7762000	7762100	Chr1	760000	760100	Chr2	13271900	13272000	Chr1	2464100	2464200				Chr1	2641000	2641100
Chr1	3431100	3431200	Chr1	1430200	1430300	Chr1	7960600	7960700	Chr1	760100	760200	Chr2	13272000	13272100	Chr1	2464300	2464400				Chr1	2641100	2641200
Chr1	3431200	3431300	Chr1	1430300	1430400	Chr1	7960700	7960800	Chr1	760400	760500	Chr2	13783100	13783200	Chr1	2464400	2464500				Chr1	2641200	2641300
Chr1	3780900	3781000	Chr1	1430400	1430500	Chr1	7960800	7960900	Chr1	781100	781200	Chr2	14369300	14369400	Chr1	2464600	2464700				Chr1	2641500	2641600
Chr1	3781000	3781100	Chr1	1430800	1430900	Chr1	7960900	7961000	Chr1	781300	781400	Chr2	14369400	14369500	Chr1	2538000	2538100				Chr1	2641600	2641700
Chr1	3785500	3785600	Chr1	1430900	1431000	Chr1	7961000	7961100	Chr1	781500	781600	Chr2	14894600	14894700	Chr1	2538100	2538200				Chr1	2641700	2641800
Chr1	3828400	3828500	Chr1	1441900	1442000	Chr1	8254800	8254900	Chr1	781700	781800	Chr2	14894700	14894800	Chr1	2538200	2538300				Chr1	2846500	2846600
Chr1	3828500	3828600	Chr1	1445300	1445400	Chr1	8277400	8277500	Chr1	791700	791800	Chr2	14894800	14894900	Chr1	2588500	2588600				Chr1	2846600	2846700
Chr1	3881500	3881600	Chr1	1445500	1445600	Chr1	8457100	8457200	Chr1	792100	792200	Chr2	15029700	15029800	Chr1	2846500	2846600				Chr1	2879300	2879400
Chr1	3933200	3933300	Chr1	1446000	1446100	Chr1	8520300	8520400	Chr1	792300	792400	Chr2	15029900	15030000	Chr1	2846600	2846700				Chr1	2939400	2939500
Chr1	3961300	3961400	Chr1	1446100	1446200	Chr1	8539600	8539700	Chr1	792400	792500	Chr2	15346200	15346300	Chr1	2879300	2879400				Chr1	2976200	2976300
Chr1	4068800	4068900	Chr1	1476500	1476600	Chr1	8622800	8622900	Chr1	822200	822300	Chr2	15890400	15890500	Chr1	2927800	2927900				Chr1	3009100	3009200
Chr1	4068900	4069000	Chr1	1613500	1613600	Chr1	8790200	8790300	Chr1	822300	822400	Chr2	17224500	17224600	Chr1	2939400	2939500				Chr1	3009400	3009500
Chr1	4069000	4069100	Chr1	1614500	1614600	Chr1	9004800	9004900	Chr1	888800	888900	Chr2	17224600	17224700	Chr1	2976200	2976300				Chr1	3180500	3180600
Chr1	4094200	4094300	Chr1	1614600	1614700	Chr1	9082800	9082900	Chr1	889000	889100	Chr3	1657800	1657900	Chr1	3132100	3132200				Chr1	3180600	3180700
Chr1	4094300	4094400	Chr1	1729100	1729200	Chr1	9305000	9305100	Chr1	889200	889300	Chr3	1738800	1738900	Chr1	3132200	3132300				Chr1	3180700	3180800
Chr1	4110100	4110200	Chr1	1881900	1882000	Chr1	9384200	9384300	Chr1	889400	889500	Chr3	1961200	1961300	Chr1	3132400	3132500				Chr1	3431200	3431300
Chr1	4110200	4110300	Chr1	1975400	1975500	Chr1	9505500	9505600	Chr1	1160200	1160300	Chr3	1971500	1971600	Chr1	3180500	3180600				Chr1	3469600	3469700
Chr1	4110500	4110600	Chr1	1975500	1975600	Chr1	9691200	9691300	Chr1	1194400	1194500	Chr3	1971800	1971900	Chr1	3180600	3180700				Chr1	3469800	3469900
Chr1	4112300	4112400	Chr1	1975900	1976000	Chr1	9755700	9755800	Chr1	1194500	1194600	Chr3	2105000	2105100	Chr1	3180700	3180800				Chr1	3678800	3678900
Chr1	4182200	4182300	Chr1	2157100	2157200	Chr1	9817400	9817500	Chr1	1194600	1194700	Chr3	3121400	3121500	Chr1	3431100	3431200				Chr1	3777900	3778000
Chr1	4209500	4209600	Chr1	2189300	2189400	Chr1	10021500	10021600	Chr1	1194700	1194800	Chr3	5068300	5068400	Chr1	3431200	3431300				Chr1	3881500	3881600
Chr1	4368900	4369000	Chr1	2189400	2189500	Chr1	10089500	10089600	Chr1	1194900	1195000	Chr3	7103500	7103600	Chr1	3469600	3469700				Chr1	3881600	3881700
Chr1	4369000	4369100	Chr1	2234100	2234200	Chr1	10093800	10093900	Chr1	1195000	1195100	Chr3	7104100	7104200	Chr1	3469700	3469800				Chr1	3914600	3914700
Chr1	4406100	4406200	Chr1	2234200	2234300	Chr1	10098700	10098800	Chr1	1195100	1195200	Chr3	7259800	7259900	Chr1	3469800	3469900				Chr1	4006900	4007000
Chr1	4406400	4406500	Chr1	2234300	2234400	Chr1	10107700	10107800	Chr1	1249900	1250000	Chr3	8979000	8979100	Chr1	3516400	3516500				Chr1	4090300	4090400
Chr1	4406500	4406600	Chr1	2234500	2234600	Chr1	10349200	10349300	Chr1	1250100	1250200	Chr3	9225900	9226000	Chr1	3516500	3516600				Chr1	4182200	4182300
Chr1	4408200	4408300	Chr1	2473200	2473300	Chr1	10475100	10475200	Chr1	1250400	1250500	Chr3	10328500	10328600	Chr1	3676600	3676700				Chr1	4182300	4182400
Chr1	4408300	4408400	Chr1	2531400	2531500	Chr1	10475200	10475300	Chr1	1250500	1250600	Chr3	10328600	10328700	Chr1	3678700	3678800				Chr1	4267000	4267100
Chr1	4409500	4409600	Chr1	2531500	2531600	Chr1	10478000	10478100	Chr1	1250600	1250700	Chr3	10925000	10925100	Chr1	3678800	3678900				Chr1	4285900	4286000
Chr1	4411000	4411100	Chr1	2531600	2531700	Chr1	10526100	10526200	Chr1	1250800	1250900	Chr3	10925100	10925200	Chr1	3881500	3881600				Chr1	4369000	4369100
Chr1	4493900	4494000	Chr1	2587300	2587400	Chr1	10526200	10526300	Chr1	1289400	1289500	Chr3	10925200	10925300	Chr1	3881600	3881700				Chr1	4393400	4393500
Chr1	4494000	4494100	Chr1	2588300	2588400	Chr1	10580000	10580100	Chr1	1430300	1430400	Chr3	11482000	11482100	Chr1	3895800	3895900				Chr1	4609400	4609500
Chr1	4505900	4506000	Chr1	2657700	2657800	Chr1	10591500	10591600	Chr1	1430700	1430800	Chr3	11482700	11482800	Chr1	3914600	3914700				Chr1	4609500	4609600
Chr1	4506000	4506100	Chr1	2791400	2791500	Chr1	10802400	10802500	Chr1	1430800	1430900	Chr3	11482800	11482900	Chr1	3961400	3961500				Chr1	4709600	4709700
Chr1	4506500	4506600	Chr1	2795400	2795500	Chr1	10802500	10802600	Chr1	1430900	1431000	Chr3	12530300	12530400	Chr1	4006800	4006900				Chr1	4741900	4742000
Chr1	4506600	4506700	Chr1	2797300	2797400	Chr1	10803200	10803300	Chr1	1444500	1444600	Chr3	12610300	12610400	Chr1	4006900	4007000				Chr1	4742000	4742100
Chr1	4506700	4506800	Chr1	2799200	2799300	Chr1	10814400	10814500	Chr1	1445300	1445400	Chr3	13157100	13157200	Chr1	4007000	4007100				Chr1	4743000	4743100
Chr1	4583400	4583500	Chr1	2799900	2800000	Chr1	10963500	10963600	Chr1	1445400	1445500	Chr3	14193000	14193100	Chr1	4007200	4007300				Chr1	4743100	4743200
Chr1	4619200	4619300	Chr1	3023600	3023700	Chr1	10963600	10963700	Chr1	1445500	1445600	Chr3	14197200	14197300	Chr1	4011900	4012000				Chr1	4761100	4761200
Chr1	4619300	4619400	Chr1	3073400	3073500	Chr1	11129000	11129100	Chr1	1445800	1445900	Chr3	14197300	14197400	Chr1	4058300	4058400				Chr1	4761200	4761300
Chr1	4619400	4619500	Chr1	3073500	3073600	Chr1	11137500	11137600	Chr1	1446000	1446100	Chr3	14197400	14197500	Chr1	4058400	4058500				Chr1	4761300	4761400
Chr1	4708500	4708600	Chr1	3073600	3073700	Chr1	11185200	11185300	Chr1	1446100	1446200	Chr3	14199200	14199300	Chr1	4058500	4058600				Chr1	4761400	4761500
Chr1	4721100	4721200	Chr1	3073700	3073800	Chr1	11241700	11241800	Chr1	1486700	1486800	Chr3	14203400	14203500	Chr1	4182100	4182200				Chr1	4842200	4842300
Chr1	4786400	4786500	Chr1	3073800	3073900	Chr1	11287600	11287700	Chr1	1592500	1592600	Chr3	16158400	16158500	Chr1	4182200	4182300				Chr1	4842300	4842400
Chr1	4842300	4842400	Chr1	3251300	3251400	Chr1	11352300	11352400	Chr1	1592600	1592700	Chr3	16158900	16159000	Chr1	4182300	4182400				Chr1	4842400	4842500
Chr1	4896600	4896700	Chr1	3342900	3343000	Chr1	11669400	11669500	Chr1	1598300	1598400	Chr3	16159000	16159100	Chr1	4266900	4267000				Chr1	5297800	5297900
Chr1	5285200	5285300	Chr1	3362100	3362200	Chr1	11706500	11706600	Chr1	1613200	1613300	Chr3	16159100	16159200	Chr1	4267000	4267100				Chr1	5297900	5298000
Chr1	5297900	5298000	Chr1	3413000	3413100	Chr1	11785900	11786000	Chr1	1613300	1613400	Chr3	16159200	16159300	Chr1	4285800	4285900				Chr1	5298000	5298100
Chr1	5392500	5392600	Chr1	3414100	3414200	Chr1	11789600	11789700	Chr1	1613500	1613600	Chr3	16159300	16159400	Chr1	4285900	4286000				Chr1	5298100	5298200
Chr1	5395400	5395500	Chr1	3546900	3547000	Chr1	11794000	11794100	Chr1	1614500	1614600	Chr3	16159400	16159500	Chr1	4368800	4368900				Chr1	5309600	5309700
Chr1	5395500	5395600	Chr1	3730200	3730300	Chr1	11834100	11834200	Chr1	1614600	1614700	Chr3	16159500	16159600	Chr1	4368900	4369000				Chr1	5380900	5381000
Chr1	5395600	5395700	Chr1	3762800	3762900	Chr1	12078100	12078200	Chr1	1617700	1617800	Chr3	16159600	16159700	Chr1	4369000	4369100				Chr1	5390600	5390700
Chr1	5659100	5659200	Chr1	3762900	3763000	Chr1	12080700	12080800	Chr1	1881900	1882000	Chr3	16159700	16159800	Chr1	4440200	4440300				Chr1	5446700	5446800
Chr1	5659200	5659300	Chr1	3780800	3780900	Chr1	12084200	12084300	Chr1	1882100	1882200	Chr3	16159800	16159900	Chr1	4522700	4522800				Chr1	5446800	5446900
Chr1	5702000	5702100	Chr1	3781400	3781500	Chr1	12328700	12328800	Chr1	1882200	1882300	Chr3	16160000	16160100	Chr1	4709600	4709700				Chr1	5447100	5447200
Chr1	5758400	5758500	Chr1	3785300	3785400	Chr1	12365100	12365200	Chr1	1975300	1975400	Chr3	16160100	16160200	Chr1	4709700	4709800				Chr1	5447400	5447500
Chr1	5758500	5758600	Chr1	3825800	3825900	Chr1	12365200	12365300	Chr1	1975400	1975500	Chr3	16160200	16160300	Chr1	4741900	4742000				Chr1	5447500	5447600
Chr1	5899600	5899700	Chr1	3825900	3826000	Chr1	12379200	12379300	Chr1	1975900	1976000	Chr3	16160300	16160400	Chr1	4742000	4742100				Chr1	5518000	5518100
Chr1	5916400	5916500	Chr1	3826300	3826400	Chr1	12379700	12379800	Chr1	1976000	1976100	Chr3	16160400	16160500	Chr1	4743000	4743100				Chr1	5686100	5686200
Chr1	5970700	5970800	Chr1	3826400	3826500	Chr1	12517400	12517500	Chr1	1976500	1976600	Chr3	16160500	16160600	Chr1	4743100	4743200				Chr1	5758400	5758500
Chr1	5970800	5970900	Chr1	3826500	3826600	Chr1	12517500	12517600	Chr1	2157100	2157200	Chr3	16160600	16160700	Chr1	4761300	4761400				Chr1	5758500	5758600
Chr1	5970900	5971000	Chr1	3826700	3826800	Chr1	12662800	12662900	Chr1	2157400	2157500	Chr3	16160700	16160800	Chr1	4820400	4820500				Chr1	6075900	6076000
Chr1	5971800	5971900	Chr1	3826800	3826900	Chr1	12876400	12876500	Chr1	2157500	2157600	Chr3	16160800	16160900	Chr1	4842200	4842300				Chr1	6076000	6076100
Chr1	5971900	5972000	Chr1	3898200	3898300	Chr1	13237500	13237600	Chr1	2157600	2157700	Chr3	16160900	16161000	Chr1	4842300	4842400				Chr1	6465900	6466000
Chr1	5972000	5972100	Chr1	3925700	3925800	Chr1	13487000	13487100	Chr1	2233800	2233900	Chr3	16161400	16161500	Chr1	4842400	4842500				Chr1	6466000	6466100
Chr1	5972100	5972200	Chr1	3933100	3933200	Chr1	13516400	13516500	Chr1	2233900	2234000	Chr3	16241300	16241400	Chr1	5170200	5170300				Chr1	6466100	6466200
Chr1	5972200	5972300	Chr1	3933200	3933300	Chr1	13660100	13660200	Chr1	2234000	2234100	Chr3	17445400	17445500	Chr1	5297800	5297900				Chr1	6488700	6488800
Chr1	5972600	5972700	Chr1	3933300	3933400	Chr1	13660200	13660300	Chr1	2234100	2234200	Chr3	18893200	18893300	Chr1	5297900	5298000				Chr1	6521000	6521100
Chr1	6157400	6157500	Chr1	3933400	3933500	Chr1	13661800	13661900	Chr1	2234200	2234300	Chr3	18893300	18893400	Chr1	5298000	5298100				Chr1	6697200	6697300
Chr1	6157700	6157800	Chr1	4061400	4061500	Chr1	13675500	13675600	Chr1	2234500	2234600	Chr3	19659600	19659700	Chr1	5298100	5298200				Chr1	6926800	6926900
Chr1	6158600	6158700	Chr1	4061800	4061900	Chr1	13774400	13774500	Chr1	2340200	2340300	Chr3	20642900	20643000	Chr1	5309600	5309700				Chr1	6941300	6941400
Chr1	6158700	6158800	Chr1	4068700	4068800	Chr1	13774500	13774600	Chr1	2415700	2415800	Chr3	20691700	20691800	Chr1	5380900	5381000				Chr1	6943900	6944000
Chr1	6197700	6197800	Chr1	4068800	4068900	Chr1	13811000	13811100	Chr1	2415800	2415900	Chr3	20725800	20725900	Chr1	5518000	5518100				Chr1	6944600	6944700
Chr1	6197800	6197900	Chr1	4069000	4069100	Chr1	13870200	13870300	Chr1	2473000	2473100	Chr3	20729500	20729600	Chr1	5518100	5518200				Chr1	6995200	6995300
Chr1	6197900	6198000	Chr1	4093400	4093500	Chr1	13870300	13870400	Chr1	2473200	2473300	Chr3	21004600	21004700	Chr1	5619400	5619500				Chr1	6995300	6995400
Chr1	6218600	6218700	Chr1	4093600	4093700	Chr1	13884000	13884100	Chr1	2531400	2531500	Chr3	21041800	21041900	Chr1	5619500	5619600				Chr1	7016500	7016600
Chr1	6218700	6218800	Chr1	4093700	4093800	Chr1	13885400	13885500	Chr1	2531500	2531600	Chr3	22054700	22054800	Chr1	5686000	5686100				Chr1	7042600	7042700
Chr1	6220600	6220700	Chr1	4094300	4094400	Chr1	13885500	13885600	Chr1	2531600	2531700	Chr3	22241500	22241600	Chr1	5686100	5686200				Chr1	7042800	7042900
Chr1	6220700	6220800	Chr1	4110100	4110200	Chr1	13890800	13890900	Chr1	2533100	2533200	Chr3	22537400	22537500	Chr1	5758300	5758400				Chr1	7042900	7043000
Chr1	6220800	6220900	Chr1	4110200	4110300	Chr1	13927900	13928000	Chr1	2533500	2533600	Chr3	22656500	22656600	Chr1	5758400	5758500				Chr1	7043000	7043100
Chr1	6235000	6235100	Chr1	4110300	4110400	Chr1	13934000	13934100	Chr1	2587300	2587400	Chr3	22860100	22860200	Chr1	5758500	5758600				Chr1	7043100	7043200
Chr1	6235900	6236000	Chr1	4110400	4110500	Chr1	13942900	13943000	Chr1	2587900	2588000	Chr4	422000	422100	Chr1	5999200	5999300				Chr1	7043200	7043300
Chr1	6379700	6379800	Chr1	4110500	4110600	Chr1	14099700	14099800	Chr1	2588300	2588400	Chr4	688000	688100	Chr1	5999300	5999400				Chr1	7082600	7082700
Chr1	6470400	6470500	Chr1	4110600	4110700	Chr1	14196300	14196400	Chr1	2657500	2657600	Chr4	1114500	1114600	Chr1	6038700	6038800				Chr1	7082700	7082800
Chr1	6488700	6488800	Chr1	4110800	4110900	Chr1	14196400	14196500	Chr1	2657600	2657700	Chr4	1318900	1319000	Chr1	6038800	6038900				Chr1	7144900	7145000
Chr1	6515200	6515300	Chr1	4110900	4111000	Chr1	14337600	14337700	Chr1	2657800	2657900	Chr4	1319000	1319100	Chr1	6075800	6075900				Chr1	7145500	7145600
Chr1	6538400	6538500	Chr1	4112100	4112200	Chr1	15081900	15082000	Chr1	2788500	2788600	Chr4	1319100	1319200	Chr1	6075900	6076000				Chr1	7145900	7146000
Chr1	6538600	6538700	Chr1	4112200	4112300	Chr1	15082000	15082100	Chr1	2789000	2789100	Chr4	1472700	1472800	Chr1	6076000	6076100				Chr1	7453400	7453500
Chr1	6539900	6540000	Chr1	4112300	4112400	Chr1	15082100	15082200	Chr1	2789100	2789200	Chr4	1472800	1472900	Chr1	6220600	6220700				Chr1	7453500	7453600
Chr1	6543000	6543100	Chr1	4112400	4112500	Chr1	15082300	15082400	Chr1	2791400	2791500	Chr4	1472900	1473000	Chr1	6220700	6220800				Chr1	7499700	7499800
Chr1	6543100	6543200	Chr1	4112500	4112600	Chr1	15082400	15082500	Chr1	2795400	2795500	Chr4	1476300	1476400	Chr1	6220800	6220900				Chr1	7656100	7656200
Chr1	6543400	6543500	Chr1	4209300	4209400	Chr1	15082500	15082600	Chr1	2795700	2795800	Chr4	1476400	1476500	Chr1	6345700	6345800				Chr1	7719600	7719700
Chr1	6704200	6704300	Chr1	4209500	4209600	Chr1	15082600	15082700	Chr1	2797300	2797400	Chr4	2184300	2184400	Chr1	6345800	6345900				Chr1	8520300	8520400
Chr1	6704300	6704400	Chr1	4293100	4293200	Chr1	15082700	15082800	Chr1	2800200	2800300	Chr4	2915900	2916000	Chr1	6465900	6466000				Chr1	8525100	8525200
Chr1	6707000	6707100	Chr1	4293200	4293300	Chr1	15082800	15082900	Chr1	2800600	2800700	Chr4	2916000	2916100	Chr1	6466000	6466100				Chr1	8756300	8756400
Chr1	6708900	6709000	Chr1	4329900	4330000	Chr1	15083100	15083200	Chr1	3023600	3023700	Chr4	2983700	2983800	Chr1	6466100	6466200				Chr1	8860700	8860800
Chr1	6709100	6709200	Chr1	4406100	4406200	Chr1	15083300	15083400	Chr1	3023800	3023900	Chr4	4110100	4110200	Chr1	6466300	6466400				Chr1	9076300	9076400
Chr1	6709200	6709300	Chr1	4406300	4406400	Chr1	15083700	15083800	Chr1	3023900	3024000	Chr4	4110200	4110300	Chr1	6488700	6488800				Chr1	9143800	9143900
Chr1	6756700	6756800	Chr1	4406400	4406500	Chr1	15083800	15083900	Chr1	3024200	3024300	Chr4	5934300	5934400	Chr1	6521000	6521100				Chr1	9158100	9158200
Chr1	6906200	6906300	Chr1	4406500	4406600	Chr1	15083900	15084000	Chr1	3073600	3073700	Chr4	6668600	6668700	Chr1	6586700	6586800				Chr1	9158200	9158300
Chr1	6926800	6926900	Chr1	4406800	4406900	Chr1	15084000	15084100	Chr1	3251300	3251400	Chr4	6668700	6668800	Chr1	6697100	6697200				Chr1	9829300	9829400
Chr1	6947700	6947800	Chr1	4406900	4407000	Chr1	15084100	15084200	Chr1	3342600	3342700	Chr4	8530200	8530300	Chr1	6697200	6697300				Chr1	10089400	10089500
Chr1	6947800	6947900	Chr1	4407300	4407400	Chr1	15084200	15084300	Chr1	3342700	3342800	Chr4	8530300	8530400	Chr1	6697400	6697500				Chr1	10089500	10089600
Chr1	6948400	6948500	Chr1	4408100	4408200	Chr1	15084300	15084400	Chr1	3342900	3343000	Chr4	11110200	11110300	Chr1	6697500	6697600				Chr1	10090300	10090400
Chr1	7036500	7036600	Chr1	4408200	4408300	Chr1	15084400	15084500	Chr1	3360600	3360700	Chr4	11210900	11211000	Chr1	6710600	6710700				Chr1	10090400	10090500
Chr1	7058200	7058300	Chr1	4408300	4408400	Chr1	15084500	15084600	Chr1	3360900	3361000	Chr4	11375300	11375400	Chr1	6710700	6710800				Chr1	10090700	10090800
Chr1	7082700	7082800	Chr1	4408600	4408700	Chr1	15084700	15084800	Chr1	3413700	3413800	Chr4	11375400	11375500	Chr1	6926800	6926900				Chr1	10090800	10090900
Chr1	7281800	7281900	Chr1	4408900	4409000	Chr1	15084800	15084900	Chr1	3414000	3414100	Chr4	12352900	12353000	Chr1	6941300	6941400				Chr1	10092300	10092400
Chr1	7282200	7282300	Chr1	4409400	4409500	Chr1	15084900	15085000	Chr1	3414100	3414200	Chr4	12429500	12429600	Chr1	6948900	6949000				Chr1	10092800	10092900
Chr1	7282300	7282400	Chr1	4409500	4409600	Chr1	15085100	15085200	Chr1	3414200	3414300	Chr4	12429600	12429700	Chr1	6995200	6995300				Chr1	10093300	10093400
Chr1	7365900	7366000	Chr1	4410800	4410900	Chr1	15085200	15085300	Chr1	3427900	3428000	Chr4	13782300	13782400	Chr1	6995300	6995400				Chr1	10093700	10093800
Chr1	7423500	7423600	Chr1	4410900	4411000	Chr1	15085300	15085400	Chr1	3546800	3546900	Chr4	15565000	15565100	Chr1	7004500	7004600				Chr1	10093800	10093900
Chr1	7423600	7423700	Chr1	4411000	4411100	Chr1	15085400	15085500	Chr1	3546900	3547000	Chr4	17276700	17276800	Chr1	7016500	7016600				Chr1	10094100	10094200
Chr1	7522200	7522300	Chr1	4415900	4416000	Chr1	15085500	15085600	Chr1	3547600	3547700	Chr4	18293700	18293800	Chr1	7042900	7043000				Chr1	10094200	10094300
Chr1	7522300	7522400	Chr1	4416000	4416100	Chr1	15085600	15085700	Chr1	3547700	3547800	Chr5	559400	559500	Chr1	7043100	7043200				Chr1	10096900	10097000
Chr1	7725300	7725400	Chr1	4494100	4494200	Chr1	15085700	15085800	Chr1	3573100	3573200	Chr5	2975100	2975200	Chr1	7082600	7082700				Chr1	10097100	10097200
Chr1	7725400	7725500	Chr1	4505900	4506000	Chr1	15085800	15085900	Chr1	3730300	3730400	Chr5	2975200	2975300	Chr1	7082700	7082800				Chr1	10097700	10097800
Chr1	7761600	7761700	Chr1	4506000	4506100	Chr1	15085900	15086000	Chr1	3762100	3762200	Chr5	3456700	3456800	Chr1	7228400	7228500				Chr1	10098600	10098700
Chr1	7761900	7762000	Chr1	4506100	4506200	Chr1	15086000	15086100	Chr1	3762200	3762300	Chr5	4162100	4162200	Chr1	7423500	7423600				Chr1	10098700	10098800
Chr1	7762000	7762100	Chr1	4506500	4506600	Chr1	15730600	15730700	Chr1	3762900	3763000	Chr5	4162200	4162300	Chr1	7499700	7499800				Chr1	10099000	10099100
Chr1	7787400	7787500	Chr1	4506600	4506700	Chr1	15802000	15802100	Chr1	3763000	3763100	Chr5	4690300	4690400	Chr1	7544500	7544600				Chr1	10099100	10099200
Chr1	7787500	7787600	Chr1	4506700	4506800	Chr1	15802100	15802200	Chr1	3771700	3771800	Chr5	4799900	4800000	Chr1	7656100	7656200				Chr1	10099400	10099500
Chr1	7960500	7960600	Chr1	4506800	4506900	Chr1	15940300	15940400	Chr1	3780800	3780900	Chr5	8439400	8439500	Chr1	7719600	7719700				Chr1	10099800	10099900
Chr1	7960700	7960800	Chr1	4583400	4583500	Chr1	16012700	16012800	Chr1	3780900	3781000	Chr5	8958600	8958700	Chr1	7884400	7884500				Chr1	10100200	10100300
Chr1	7960800	7960900	Chr1	4619300	4619400	Chr1	16017700	16017800	Chr1	3781000	3781100	Chr5	8958700	8958800	Chr1	8102800	8102900				Chr1	10100300	10100400
Chr1	7960900	7961000	Chr1	4619400	4619500	Chr1	16017800	16017900	Chr1	3781100	3781200	Chr5	8972500	8972600	Chr1	8263000	8263100				Chr1	10101000	10101100
Chr1	7961000	7961100	Chr1	4619500	4619600	Chr1	16017900	16018000	Chr1	3781200	3781300	Chr5	8972800	8972900	Chr1	8263100	8263200				Chr1	10101600	10101700
Chr1	7985100	7985200	Chr1	4620500	4620600	Chr1	16019300	16019400	Chr1	3782400	3782500	Chr5	9494100	9494200	Chr1	8458300	8458400				Chr1	10101900	10102000
Chr1	7986300	7986400	Chr1	4708500	4708600	Chr1	16038600	16038700	Chr1	3785300	3785400	Chr5	9494500	9494600	Chr1	8500700	8500800				Chr1	10102000	10102100
Chr1	8016500	8016600	Chr1	4721000	4721100	Chr1	16259700	16259800	Chr1	3785400	3785500	Chr5	9789600	9789700	Chr1	8520200	8520300				Chr1	10106000	10106100
Chr1	8053200	8053300	Chr1	4739200	4739300	Chr1	16286900	16287000	Chr1	3785500	3785600	Chr5	10379200	10379300	Chr1	8520300	8520400				Chr1	10106100	10106200
Chr1	8053300	8053400	Chr1	4770500	4770600	Chr1	16298900	16299000	Chr1	3785600	3785700	Chr5	16660500	16660600	Chr1	8525000	8525100				Chr1	10106500	10106600
Chr1	8053700	8053800	Chr1	4770600	4770700	Chr1	16326500	16326600	Chr1	3825800	3825900	Chr5	16660600	16660700	Chr1	8525100	8525200				Chr1	10106900	10107000
Chr1	8053800	8053900	Chr1	4786000	4786100	Chr1	16364600	16364700	Chr1	3825900	3826000	Chr5	18171700	18171800	Chr1	8756300	8756400				Chr1	10107600	10107700
Chr1	8115700	8115800	Chr1	4786400	4786500	Chr1	16385000	16385100	Chr1	3827200	3827300	Chr5	20996800	20996900	Chr1	8756400	8756500				Chr1	10107700	10107800
Chr1	8116000	8116100	Chr1	4786500	4786600	Chr1	16385100	16385200	Chr1	3827300	3827400	Chr5	21811900	21812000	Chr1	8767600	8767700				Chr1	10108300	10108400
Chr1	8116100	8116200	Chr1	4966500	4966600	Chr1	16385200	16385300	Chr1	3827600	3827700	Chr5	21814200	21814300	Chr1	8770100	8770200				Chr1	10108400	10108500
Chr1	8160700	8160800	Chr1	4966600	4966700	Chr1	16386700	16386800	Chr1	3892100	3892200	Chr5	21888300	21888400	Chr1	8770600	8770700				Chr1	10108700	10108800
Chr1	8237800	8237900	Chr1	4992700	4992800	Chr1	16433900	16434000	Chr1	3892200	3892300	Chr5	21939700	21939800	Chr1	8776000	8776100				Chr1	10207300	10207400
Chr1	8267400	8267500	Chr1	5101900	5102000	Chr1	16434000	16434100	Chr1	3910500	3910600	Chr5	21939800	21939900	Chr1	8776100	8776200				Chr1	10227000	10227100
Chr1	8267500	8267600	Chr1	5285200	5285300	Chr1	16511100	16511200	Chr1	3925700	3925800	Chr5	21945500	21945600	Chr1	8777600	8777700				Chr1	10227100	10227200
Chr1	8276100	8276200	Chr1	5391500	5391600	Chr1	16513500	16513600	Chr1	3933200	3933300	Chr5	21990600	21990700	Chr1	8781900	8782000				Chr1	10300600	10300700
Chr1	8276200	8276300	Chr1	5392400	5392500	Chr1	16514400	16514500	Chr1	3933300	3933400	Chr5	25066500	25066600	Chr1	8784500	8784600				Chr1	10309000	10309100
Chr1	8277400	8277500	Chr1	5392500	5392600	Chr1	16514800	16514900	Chr1	3933400	3933500	Chr5	25066600	25066700	Chr1	8784900	8785000				Chr1	10472300	10472400
Chr1	8283000	8283100	Chr1	5395400	5395500	Chr1	16515700	16515800	Chr1	3980100	3980200	Chr5	26348800	26348900	Chr1	8785000	8785100				Chr1	10472400	10472500
Chr1	8283200	8283300	Chr1	5395500	5395600	Chr1	16520200	16520300	Chr1	4061500	4061600	Chr5	26567600	26567700	Chr1	8798600	8798700				Chr1	10472500	10472600
Chr1	8409200	8409300	Chr1	5437000	5437100	Chr1	16522300	16522400	Chr1	4061600	4061700	Chr5	26949800	26949900	Chr1	8800100	8800200				Chr1	10472600	10472700
Chr1	8457100	8457200	Chr1	5437100	5437200	Chr1	16522600	16522700	Chr1	4093600	4093700				Chr1	8804500	8804600				Chr1	10472700	10472800
Chr1	8513400	8513500	Chr1	5437700	5437800	Chr1	16522900	16523000	Chr1	4094200	4094300				Chr1	8807000	8807100				Chr1	10472800	10472900
Chr1	8513500	8513600	Chr1	5657900	5658000	Chr1	16523500	16523600	Chr1	4094300	4094400				Chr1	8812900	8813000				Chr1	10472900	10473000
Chr1	8513700	8513800	Chr1	5659100	5659200	Chr1	16524000	16524100	Chr1	4110100	4110200				Chr1	8813000	8813100				Chr1	10473000	10473100
Chr1	8513800	8513900	Chr1	5659200	5659300	Chr1	16524800	16524900	Chr1	4110200	4110300				Chr1	8814500	8814600				Chr1	10473100	10473200
Chr1	8525100	8525200	Chr1	5681700	5681800	Chr1	16528600	16528700	Chr1	4110400	4110500				Chr1	8818800	8818900				Chr1	10475000	10475100
Chr1	8539600	8539700	Chr1	5681800	5681900	Chr1	16593000	16593100	Chr1	4110500	4110600				Chr1	8821400	8821500				Chr1	10475100	10475200
Chr1	8591000	8591100	Chr1	5700300	5700400	Chr1	16624600	16624700	Chr1	4110600	4110700				Chr1	8821900	8822000				Chr1	10475200	10475300
Chr1	8591100	8591200	Chr1	5700600	5700700	Chr1	16625600	16625700	Chr1	4110700	4110800				Chr1	8827300	8827400				Chr1	10475300	10475400
Chr1	8622800	8622900	Chr1	5700900	5701000	Chr1	16737800	16737900	Chr1	4110800	4110900				Chr1	8828900	8829000				Chr1	10475400	10475500
Chr1	8645400	8645500	Chr1	5701000	5701100	Chr1	16791400	16791500	Chr1	4110900	4111000				Chr1	8835800	8835900				Chr1	10475500	10475600
Chr1	8741500	8741600	Chr1	5701200	5701300	Chr1	16905000	16905100	Chr1	4112300	4112400				Chr1	8836200	8836300				Chr1	10475700	10475800
Chr1	8767100	8767200	Chr1	5701600	5701700	Chr1	16967600	16967700	Chr1	4112400	4112500				Chr1	8836300	8836400				Chr1	10475800	10475900
Chr1	8778300	8778400	Chr1	5701700	5701800	Chr1	16987800	16987900	Chr1	4112500	4112600				Chr1	9076300	9076400				Chr1	10478000	10478100
Chr1	8778400	8778500	Chr1	5701900	5702000	Chr1	16998000	16998100	Chr1	4112900	4113000				Chr1	9143800	9143900				Chr1	10478100	10478200
Chr1	8778500	8778600	Chr1	5799000	5799100	Chr1	17151800	17151900	Chr1	4209100	4209200				Chr1	9158100	9158200				Chr1	10478200	10478300
Chr1	8778600	8778700	Chr1	5799200	5799300	Chr1	17405600	17405700	Chr1	4209200	4209300				Chr1	9158200	9158300				Chr1	10478300	10478400
Chr1	8778700	8778800	Chr1	5862900	5863000	Chr1	17406100	17406200	Chr1	4209300	4209400				Chr1	9829300	9829400				Chr1	10478400	10478500
Chr1	8778800	8778900	Chr1	5899600	5899700	Chr1	17502600	17502700	Chr1	4209400	4209500				Chr1	9829400	9829500				Chr1	10478500	10478600
Chr1	8778900	8779000	Chr1	5899700	5899800	Chr1	17528800	17528900	Chr1	4209500	4209600				Chr1	10089400	10089500				Chr1	10478600	10478700
Chr1	8781400	8781500	Chr1	5911700	5911800	Chr1	17528900	17529000	Chr1	4329900	4330000				Chr1	10089500	10089600				Chr1	10478700	10478800
Chr1	8791400	8791500	Chr1	5958800	5958900	Chr1	17660100	17660200	Chr1	4334300	4334400				Chr1	10090300	10090400				Chr1	10478800	10478900
Chr1	8800800	8800900	Chr1	5970700	5970800	Chr1	17665000	17665100	Chr1	4406100	4406200				Chr1	10090400	10090500				Chr1	10478900	10479000
Chr1	8800900	8801000	Chr1	5970800	5970900	Chr1	17665100	17665200	Chr1	4406200	4406300				Chr1	10090700	10090800				Chr1	10722300	10722400
Chr1	8801000	8801100	Chr1	5970900	5971000	Chr1	17709500	17709600	Chr1	4406300	4406400				Chr1	10090800	10090900				Chr1	10722900	10723000
Chr1	8801100	8801200	Chr1	5971400	5971500	Chr1	17709600	17709700	Chr1	4406700	4406800				Chr1	10092300	10092400				Chr1	10756700	10756800
Chr1	8801200	8801300	Chr1	5971600	5971700	Chr1	17713700	17713800	Chr1	4406900	4407000				Chr1	10092800	10092900				Chr1	10927600	10927700
Chr1	8801300	8801400	Chr1	5971700	5971800	Chr1	17714400	17714500	Chr1	4407300	4407400				Chr1	10093300	10093400				Chr1	10963500	10963600
Chr1	8801400	8801500	Chr1	5971800	5971900	Chr1	17825700	17825800	Chr1	4407600	4407700				Chr1	10093700	10093800				Chr1	10963600	10963700
Chr1	8804000	8804100	Chr1	5971900	5972000	Chr1	17825800	17825900	Chr1	4407900	4408000				Chr1	10093800	10093900				Chr1	11131200	11131300
Chr1	8815200	8815300	Chr1	5972000	5972100	Chr1	17863200	17863300	Chr1	4408100	4408200				Chr1	10094100	10094200				Chr1	11137500	11137600
Chr1	8815300	8815400	Chr1	5972100	5972200	Chr1	17937800	17937900	Chr1	4408200	4408300				Chr1	10094200	10094300				Chr1	11185200	11185300
Chr1	8815400	8815500	Chr1	5972200	5972300	Chr1	18026900	18027000	Chr1	4408300	4408400				Chr1	10096900	10097000				Chr1	11214900	11215000
Chr1	8815500	8815600	Chr1	5972500	5972600	Chr1	18027000	18027100	Chr1	4408800	4408900				Chr1	10097000	10097100				Chr1	11215000	11215100
Chr1	8815600	8815700	Chr1	6156500	6156600	Chr1	18088700	18088800	Chr1	4408900	4409000				Chr1	10097100	10097200				Chr1	11215100	11215200
Chr1	8815700	8815800	Chr1	6156700	6156800	Chr1	18088800	18088900	Chr1	4410800	4410900				Chr1	10097700	10097800				Chr1	11215200	11215300
Chr1	8815800	8815900	Chr1	6156900	6157000	Chr1	18111100	18111200	Chr1	4410900	4411000				Chr1	10098600	10098700				Chr1	11215700	11215800
Chr1	8818300	8818400	Chr1	6158600	6158700	Chr1	18300300	18300400	Chr1	4411000	4411100				Chr1	10098700	10098800				Chr1	11215900	11216000
Chr1	8829600	8829700	Chr1	6158700	6158800	Chr1	18300400	18300500	Chr1	4525300	4525400				Chr1	10099000	10099100				Chr1	11786000	11786100
Chr1	8829700	8829800	Chr1	6197700	6197800	Chr1	18386500	18386600	Chr1	4583400	4583500				Chr1	10099100	10099200				Chr1	11834000	11834100
Chr1	8829800	8829900	Chr1	6197800	6197900	Chr1	18387300	18387400	Chr1	4658200	4658300				Chr1	10099400	10099500				Chr1	11834100	11834200
Chr1	8829900	8830000	Chr1	6218600	6218700	Chr1	18548100	18548200	Chr1	4658300	4658400				Chr1	10099800	10099900				Chr1	12023400	12023500
Chr1	8830000	8830100	Chr1	6218700	6218800	Chr1	18548200	18548300	Chr1	4682400	4682500				Chr1	10100200	10100300				Chr1	12023500	12023600
Chr1	8830100	8830200	Chr1	6235000	6235100	Chr1	18548300	18548400	Chr1	4770200	4770300				Chr1	10100300	10100400				Chr1	12294700	12294800
Chr1	8830200	8830300	Chr1	6236000	6236100	Chr1	18549400	18549500	Chr1	4785700	4785800				Chr1	10101000	10101100				Chr1	12376800	12376900
Chr1	8832700	8832800	Chr1	6236500	6236600	Chr1	18549500	18549600	Chr1	4785800	4785900				Chr1	10101600	10101700				Chr1	14196300	14196400
Chr1	9004800	9004900	Chr1	6237600	6237700	Chr1	18549600	18549700	Chr1	4785900	4786000				Chr1	10101900	10102000				Chr1	14196400	14196500
Chr1	9004900	9005000	Chr1	6273500	6273600	Chr1	18895300	18895400	Chr1	4786000	4786100				Chr1	10102000	10102100				Chr1	15276600	15276700
Chr1	9005000	9005100	Chr1	6273600	6273700	Chr1	19336300	19336400	Chr1	4786400	4786500				Chr1	10106000	10106100				Chr1	15279700	15279800
Chr1	9015200	9015300	Chr1	6379700	6379800	Chr1	19728700	19728800	Chr1	4786900	4787000				Chr1	10106100	10106200				Chr1	15374700	15374800
Chr1	9015300	9015400	Chr1	6404800	6404900	Chr1	19728800	19728900	Chr1	4787000	4787100				Chr1	10106500	10106600				Chr1	15377800	15377900
Chr1	9018200	9018300	Chr1	6454800	6454900	Chr1	19728900	19729000	Chr1	4896600	4896700				Chr1	10106900	10107000				Chr1	15730600	15730700
Chr1	9018300	9018400	Chr1	6454900	6455000	Chr1	19729000	19729100	Chr1	4966600	4966700				Chr1	10107600	10107700				Chr1	16431500	16431600
Chr1	9018400	9018500	Chr1	6470400	6470500	Chr1	19780500	19780600	Chr1	4966700	4966800				Chr1	10107700	10107800				Chr1	16432400	16432500
Chr1	9077700	9077800	Chr1	6515200	6515300	Chr1	20310500	20310600	Chr1	5056000	5056100				Chr1	10108300	10108400				Chr1	16432500	16432600
Chr1	9138200	9138300	Chr1	6538400	6538500	Chr1	20685500	20685600	Chr1	5056100	5056200				Chr1	10108400	10108500				Chr1	16432900	16433000
Chr1	9138300	9138400	Chr1	6538500	6538600	Chr1	20699800	20699900	Chr1	5056200	5056300				Chr1	10108700	10108800				Chr1	16433400	16433500
Chr1	9174300	9174400	Chr1	6538600	6538700	Chr1	20772200	20772300	Chr1	5098500	5098600				Chr1	10151600	10151700				Chr1	16433900	16434000
Chr1	9174400	9174500	Chr1	6538700	6538800	Chr1	20972600	20972700	Chr1	5098600	5098700				Chr1	10207300	10207400				Chr1	16434000	16434100
Chr1	9205200	9205300	Chr1	6539900	6540000	Chr1	21125900	21126000	Chr1	5101900	5102000				Chr1	10300300	10300400				Chr1	16873000	16873100
Chr1	9305000	9305100	Chr1	6540000	6540100	Chr1	21126000	21126100	Chr1	5171900	5172000				Chr1	10300400	10300500				Chr1	17156600	17156700
Chr1	9384200	9384300	Chr1	6540500	6540600	Chr1	21211200	21211300	Chr1	5285200	5285300				Chr1	10300500	10300600				Chr1	17158500	17158600
Chr1	9384300	9384400	Chr1	6540600	6540700	Chr1	21260200	21260300	Chr1	5356900	5357000				Chr1	10300600	10300700				Chr1	17158900	17159000
Chr1	9564800	9564900	Chr1	6540800	6540900	Chr1	21336300	21336400	Chr1	5357000	5357100				Chr1	10300700	10300800				Chr1	17159000	17159100
Chr1	9565000	9565100	Chr1	6541100	6541200	Chr1	21336400	21336500	Chr1	5391400	5391500				Chr1	10300800	10300900				Chr1	17160500	17160600
Chr1	9630100	9630200	Chr1	6541200	6541300	Chr1	21681500	21681600	Chr1	5391500	5391600				Chr1	10308700	10308800				Chr1	17160900	17161000
Chr1	9630200	9630300	Chr1	6541700	6541800	Chr1	21739100	21739200	Chr1	5392400	5392500				Chr1	10308800	10308900				Chr1	17161000	17161100
Chr1	9676900	9677000	Chr1	6541900	6542000	Chr1	21739200	21739300	Chr1	5392500	5392600				Chr1	10308900	10309000				Chr1	17162000	17162100
Chr1	9682400	9682500	Chr1	6542100	6542200	Chr1	22106500	22106600	Chr1	5437000	5437100				Chr1	10309000	10309100				Chr1	17203700	17203800
Chr1	9691000	9691100	Chr1	6543000	6543100	Chr1	22106600	22106700	Chr1	5437700	5437800				Chr1	10309100	10309200				Chr1	17203800	17203900
Chr1	9691100	9691200	Chr1	6543100	6543200	Chr1	22192400	22192500	Chr1	5658700	5658800				Chr1	10309200	10309300				Chr1	17284500	17284600
Chr1	9691200	9691300	Chr1	6543200	6543300	Chr1	22542100	22542200	Chr1	5659100	5659200				Chr1	10472500	10472600				Chr1	17731800	17731900
Chr1	9707900	9708000	Chr1	6543300	6543400	Chr1	22542200	22542300	Chr1	5659200	5659300				Chr1	10472600	10472700				Chr1	17731900	17732000
Chr1	9754400	9754500	Chr1	6543400	6543500	Chr1	22577400	22577500	Chr1	5679300	5679400				Chr1	10475100	10475200				Chr1	17825700	17825800
Chr1	9754800	9754900	Chr1	6574000	6574100	Chr1	22577600	22577700	Chr1	5680300	5680400				Chr1	10475200	10475300				Chr1	17825800	17825900
Chr1	9755100	9755200	Chr1	6589600	6589700	Chr1	22621400	22621500	Chr1	5681700	5681800				Chr1	10478300	10478400				Chr1	18026900	18027000
Chr1	9755400	9755500	Chr1	6640400	6640500	Chr1	22872400	22872500	Chr1	5691900	5692000				Chr1	10478400	10478500				Chr1	18027000	18027100
Chr1	9755700	9755800	Chr1	6660000	6660100	Chr1	22872500	22872600	Chr1	5700600	5700700				Chr1	10478700	10478800				Chr1	18218500	18218600
Chr1	9756000	9756100	Chr1	6660300	6660400	Chr1	22872700	22872800	Chr1	5700900	5701000				Chr1	10478800	10478900				Chr1	18218600	18218700
Chr1	9756100	9756200	Chr1	6704200	6704300	Chr1	22992700	22992800	Chr1	5701200	5701300				Chr1	10756700	10756800				Chr1	18308900	18309000
Chr1	9756400	9756500	Chr1	6704300	6704400	Chr1	23118300	23118400	Chr1	5799300	5799400				Chr1	10840200	10840300				Chr1	18387800	18387900
Chr1	9759800	9759900	Chr1	6704400	6704500	Chr1	23122900	23123000	Chr1	5799400	5799500				Chr1	10928100	10928200				Chr1	18388800	18388900
Chr1	9811900	9812000	Chr1	6705700	6705800	Chr1	23125200	23125300	Chr1	5862900	5863000				Chr1	10928200	10928300				Chr1	18549300	18549400
Chr1	9817100	9817200	Chr1	6705800	6705900	Chr1	23178100	23178200	Chr1	5863000	5863100				Chr1	10963500	10963600				Chr1	18549400	18549500
Chr1	9817400	9817500	Chr1	6706300	6706400	Chr1	23178400	23178500	Chr1	5899600	5899700				Chr1	10963600	10963700				Chr1	18549500	18549600
Chr1	9817500	9817600	Chr1	6706400	6706500	Chr1	23178500	23178600	Chr1	5899700	5899800				Chr1	10982300	10982400				Chr1	18549600	18549700
Chr1	9829300	9829400	Chr1	6706600	6706700	Chr1	23205900	23206000	Chr1	5911700	5911800				Chr1	10982400	10982500				Chr1	18553000	18553100
Chr1	9862600	9862700	Chr1	6706900	6707000	Chr1	23214700	23214800	Chr1	5911800	5911900				Chr1	10982500	10982600				Chr1	18557900	18558000
Chr1	9862700	9862800	Chr1	6707000	6707100	Chr1	23276300	23276400	Chr1	5916400	5916500				Chr1	10982600	10982700				Chr1	19498400	19498500
Chr1	9915300	9915400	Chr1	6707700	6707800	Chr1	23299700	23299800	Chr1	5965500	5965600				Chr1	10982700	10982800				Chr1	19685100	19685200
Chr1	9915400	9915500	Chr1	6707900	6708000	Chr1	23299900	23300000	Chr1	5965600	5965700				Chr1	10982800	10982900				Chr1	19685200	19685300
Chr1	10021500	10021600	Chr1	6708000	6708100	Chr1	23300100	23300200	Chr1	5970700	5970800				Chr1	10982900	10983000				Chr1	19713500	19713600
Chr1	10023000	10023100	Chr1	6708400	6708500	Chr1	23300300	23300400	Chr1	5970800	5970900				Chr1	10983000	10983100				Chr1	19925800	19925900
Chr1	10023100	10023200	Chr1	6708900	6709000	Chr1	23302200	23302300	Chr1	5974900	5975000				Chr1	10983100	10983200				Chr1	19925900	19926000
Chr1	10023200	10023300	Chr1	6709000	6709100	Chr1	23302400	23302500	Chr1	5975000	5975100				Chr1	10983200	10983300				Chr1	19981500	19981600
Chr1	10023300	10023400	Chr1	6709100	6709200	Chr1	23302500	23302600	Chr1	6074900	6075000				Chr1	10983300	10983400				Chr1	20039500	20039600
Chr1	10023400	10023500	Chr1	6709200	6709300	Chr1	23302600	23302700	Chr1	6102700	6102800				Chr1	11104100	11104200				Chr1	20309900	20310000
Chr1	10089400	10089500	Chr1	6709600	6709700	Chr1	23302800	23302900	Chr1	6102800	6102900				Chr1	11129100	11129200				Chr1	20310000	20310100
Chr1	10089500	10089600	Chr1	6715400	6715500	Chr1	23307200	23307300	Chr1	6156600	6156700				Chr1	11131200	11131300				Chr1	20310400	20310500
Chr1	10090400	10090500	Chr1	6718000	6718100	Chr1	23307400	23307500	Chr1	6156700	6156800				Chr1	11185200	11185300				Chr1	20310500	20310600
Chr1	10090800	10090900	Chr1	6720800	6720900	Chr1	23307600	23307700	Chr1	6156900	6157000				Chr1	11423200	11423300				Chr1	20310600	20310700
Chr1	10092300	10092400	Chr1	6736800	6736900	Chr1	23307800	23307900	Chr1	6158500	6158600				Chr1	11670600	11670700				Chr1	20412900	20413000
Chr1	10092800	10092900	Chr1	6736900	6737000	Chr1	23345300	23345400	Chr1	6158600	6158700				Chr1	11672200	11672300				Chr1	20772200	20772300
Chr1	10093300	10093400	Chr1	6744100	6744200	Chr1	23345400	23345500	Chr1	6158700	6158800				Chr1	11672300	11672400				Chr1	20791300	20791400
Chr1	10093700	10093800	Chr1	6756700	6756800	Chr1	23386400	23386500	Chr1	6173400	6173500				Chr1	11685300	11685400				Chr1	20802900	20803000
Chr1	10093800	10093900	Chr1	6759000	6759100	Chr1	23389400	23389500	Chr1	6197400	6197500				Chr1	11785900	11786000				Chr1	20803000	20803100
Chr1	10094200	10094300	Chr1	6906100	6906200	Chr1	23389700	23389800	Chr1	6197500	6197600				Chr1	11786000	11786100				Chr1	20803100	20803200
Chr1	10096900	10097000	Chr1	6906200	6906300	Chr1	23413600	23413700	Chr1	6197800	6197900				Chr1	11797200	11797300				Chr1	21269100	21269200
Chr1	10097000	10097100	Chr1	6906300	6906400	Chr1	23413700	23413800	Chr1	6218600	6218700				Chr1	11837400	11837500				Chr1	21269500	21269600
Chr1	10097100	10097200	Chr1	6906400	6906500	Chr1	23413900	23414000	Chr1	6218700	6218800				Chr1	11837500	11837600				Chr1	21270200	21270300
Chr1	10097700	10097800	Chr1	6947800	6947900	Chr1	23414000	23414100	Chr1	6234100	6234200				Chr1	11957400	11957500				Chr1	21270300	21270400
Chr1	10098700	10098800	Chr1	6948300	6948400	Chr1	23414100	23414200	Chr1	6234600	6234700				Chr1	11957500	11957600				Chr1	21270600	21270700
Chr1	10099100	10099200	Chr1	6948400	6948500	Chr1	23420000	23420100	Chr1	6235000	6235100				Chr1	11957600	11957700				Chr1	21271000	21271100
Chr1	10099400	10099500	Chr1	7027100	7027200	Chr1	23420100	23420200	Chr1	6236500	6236600				Chr1	12097100	12097200				Chr1	21272100	21272200
Chr1	10099800	10099900	Chr1	7035700	7035800	Chr1	23489400	23489500	Chr1	6273600	6273700				Chr1	12097200	12097300				Chr1	21272500	21272600
Chr1	10100300	10100400	Chr1	7036000	7036100	Chr1	23489500	23489600	Chr1	6275000	6275100				Chr1	12294700	12294800				Chr1	21273300	21273400
Chr1	10101000	10101100	Chr1	7036500	7036600	Chr1	23490300	23490400	Chr1	6276000	6276100				Chr1	12376800	12376900				Chr1	21273600	21273700
Chr1	10101600	10101700	Chr1	7132900	7133000	Chr1	23490600	23490700	Chr1	6302900	6303000				Chr1	12640900	12641000				Chr1	21274000	21274100
Chr1	10102000	10102100	Chr1	7255000	7255100	Chr1	23490700	23490800	Chr1	6303100	6303200				Chr1	12641000	12641100				Chr1	21274100	21274200
Chr1	10106100	10106200	Chr1	7255100	7255200	Chr1	23508000	23508100	Chr1	6403600	6403700				Chr1	12642500	12642600				Chr1	21274800	21274900
Chr1	10106500	10106600	Chr1	7255200	7255300	Chr1	23508400	23508500	Chr1	6404800	6404900				Chr1	12673100	12673200				Chr1	21275100	21275200
Chr1	10106900	10107000	Chr1	7257100	7257200	Chr1	23508600	23508700	Chr1	6455100	6455200				Chr1	12986800	12986900				Chr1	21275600	21275700
Chr1	10107600	10107700	Chr1	7282200	7282300	Chr1	23587100	23587200	Chr1	6455400	6455500				Chr1	13050700	13050800				Chr1	21276300	21276400
Chr1	10107700	10107800	Chr1	7282300	7282400	Chr1	23587200	23587300	Chr1	6470400	6470500				Chr1	13050800	13050900				Chr1	21276600	21276700
Chr1	10108400	10108500	Chr1	7282700	7282800	Chr1	23587800	23587900	Chr1	6515200	6515300				Chr1	13686400	13686500				Chr1	21276700	21276800
Chr1	10152800	10152900	Chr1	7282800	7282900	Chr1	24714700	24714800	Chr1	6538400	6538500				Chr1	13827800	13827900				Chr1	21277100	21277200
Chr1	10152900	10153000	Chr1	7283800	7283900	Chr1	24714800	24714900	Chr1	6538500	6538600				Chr1	13827900	13828000				Chr1	21277800	21277900
Chr1	10197000	10197100	Chr1	7353000	7353100	Chr1	24721100	24721200	Chr1	6538600	6538700				Chr1	14196300	14196400				Chr1	21278100	21278200
Chr1	10197100	10197200	Chr1	7353600	7353700	Chr1	24721200	24721300	Chr1	6539900	6540000				Chr1	14196400	14196500				Chr1	21278200	21278300
Chr1	10384100	10384200	Chr1	7353700	7353800	Chr1	24721400	24721500	Chr1	6540500	6540600				Chr1	14286100	14286200				Chr1	21278600	21278700
Chr1	10384200	10384300	Chr1	7354300	7354400	Chr1	24908500	24908600	Chr1	6540600	6540700				Chr1	14286200	14286300				Chr1	21279300	21279400
Chr1	10526100	10526200	Chr1	7356200	7356300	Chr1	24913200	24913300	Chr1	6541500	6541600				Chr1	15272300	15272400				Chr1	21279400	21279500
Chr1	10526200	10526300	Chr1	7356300	7356400	Chr1	24921100	24921200	Chr1	6541800	6541900				Chr1	15276600	15276700				Chr1	21279700	21279800
Chr1	10527100	10527200	Chr1	7358100	7358200	Chr1	25097900	25098000	Chr1	6541900	6542000				Chr1	15279700	15279800				Chr1	21280100	21280200
Chr1	10579900	10580000	Chr1	7362100	7362200	Chr1	25660100	25660200	Chr1	6542100	6542200				Chr1	15370400	15370500				Chr1	21280900	21281000
Chr1	10580000	10580100	Chr1	7365000	7365100	Chr1	25660200	25660300	Chr1	6542500	6542600				Chr1	15374700	15374800				Chr1	21281200	21281300
Chr1	10591500	10591600	Chr1	7393300	7393400	Chr1	26170100	26170200	Chr1	6543000	6543100				Chr1	15377800	15377900				Chr1	21281700	21281800
Chr1	10660100	10660200	Chr1	7522000	7522100	Chr1	26197000	26197100	Chr1	6543100	6543200				Chr1	15730600	15730700				Chr1	21282400	21282500
Chr1	10660200	10660300	Chr1	7522100	7522200	Chr1	26510700	26510800	Chr1	6543200	6543300				Chr1	16025400	16025500				Chr1	21282700	21282800
Chr1	10660300	10660400	Chr1	7522200	7522300	Chr1	26510800	26510900	Chr1	6543300	6543400				Chr1	16025500	16025600				Chr1	21282800	21282900
Chr1	10660400	10660500	Chr1	7522300	7522400	Chr1	26780500	26780600	Chr1	6543400	6543500				Chr1	16431100	16431200				Chr1	21283200	21283300
Chr1	10660500	10660600	Chr1	7665800	7665900	Chr1	26881100	26881200	Chr1	6575000	6575100				Chr1	16431500	16431600				Chr1	21283900	21284000
Chr1	10777200	10777300	Chr1	7710500	7710600	Chr1	27713200	27713300	Chr1	6589600	6589700				Chr1	16432000	16432100				Chr1	21284000	21284100
Chr1	10777300	10777400	Chr1	7710600	7710700	Chr1	27713300	27713400	Chr1	6592100	6592200				Chr1	16432100	16432200				Chr1	21284300	21284400
Chr1	10802800	10802900	Chr1	7710700	7710800	Chr1	28051500	28051600	Chr1	6592900	6593000				Chr1	16432400	16432500				Chr1	21284700	21284800
Chr1	10803100	10803200	Chr1	7712300	7712400	Chr1	28161500	28161600	Chr1	6594000	6594100				Chr1	16432500	16432600				Chr1	21285500	21285600
Chr1	10803200	10803300	Chr1	7714700	7714800	Chr1	28731900	28732000	Chr1	6641000	6641100				Chr1	16432900	16433000				Chr1	21285800	21285900
Chr1	10814300	10814400	Chr1	7714800	7714900	Chr1	29244500	29244600	Chr1	6659900	6660000				Chr1	16433400	16433500				Chr1	21286300	21286400
Chr1	10931900	10932000	Chr1	7718000	7718100	Chr1	29422500	29422600	Chr1	6660000	6660100				Chr1	16433900	16434000				Chr1	21287000	21287100
Chr1	11020400	11020500	Chr1	7722100	7722200	Chr1	29525200	29525300	Chr1	6660300	6660400				Chr1	16434000	16434100				Chr1	21287300	21287400
Chr1	11020500	11020600	Chr1	7722200	7722300	Chr1	29984300	29984400	Chr1	6704300	6704400				Chr1	16457200	16457300				Chr1	21287400	21287500
Chr1	11051200	11051300	Chr1	7725300	7725400	Chr1	30254200	30254300	Chr1	6704400	6704500				Chr1	16585700	16585800				Chr1	21287800	21287900
Chr1	11104100	11104200	Chr1	7725400	7725500	Chr2	1000	1100	Chr1	6706400	6706500				Chr1	16694500	16694600				Chr1	21288500	21288600
Chr1	11126700	11126800	Chr1	7748100	7748200	Chr2	1100	1200	Chr1	6707000	6707100				Chr1	16766200	16766300				Chr1	21288600	21288700
Chr1	11126800	11126900	Chr1	7761200	7761300	Chr2	1200	1300	Chr1	6707600	6707700				Chr1	16766300	16766400				Chr1	21288900	21289000
Chr1	11127500	11127600	Chr1	7761300	7761400	Chr2	1300	1400	Chr1	6707700	6707800				Chr1	16766400	16766500				Chr1	21289300	21289400
Chr1	11129000	11129100	Chr1	7761500	7761600	Chr2	1400	1500	Chr1	6707900	6708000				Chr1	17156600	17156700				Chr1	21290400	21290500
Chr1	11132700	11132800	Chr1	7761600	7761700	Chr2	1800	1900	Chr1	6708400	6708500				Chr1	17158500	17158600				Chr1	21291400	21291500
Chr1	11137500	11137600	Chr1	7761700	7761800	Chr2	1900	2000	Chr1	6708600	6708700				Chr1	17158600	17158700				Chr1	21291700	21291800
Chr1	11139700	11139800	Chr1	7761900	7762000	Chr2	2000	2100	Chr1	6709100	6709200				Chr1	17158900	17159000				Chr1	21291800	21291900
Chr1	11139800	11139900	Chr1	7762000	7762100	Chr2	2100	2200	Chr1	6709200	6709300				Chr1	17159000	17159100				Chr1	21292200	21292300
Chr1	11139900	11140000	Chr1	7766300	7766400	Chr2	2200	2300	Chr1	6715400	6715500				Chr1	17160500	17160600				Chr1	21293300	21293400
Chr1	11140000	11140100	Chr1	7787400	7787500	Chr2	2700	2800	Chr1	6715500	6715600				Chr1	17160900	17161000				Chr1	21294300	21294400
Chr1	11140100	11140200	Chr1	7787500	7787600	Chr2	2800	2900	Chr1	6718000	6718100				Chr1	17161000	17161100				Chr1	21294600	21294700
Chr1	11204500	11204600	Chr1	7810100	7810200	Chr2	3000	3100	Chr1	6720800	6720900				Chr1	17162000	17162100				Chr1	21295100	21295200
Chr1	11241600	11241700	Chr1	7810300	7810400	Chr2	3200	3300	Chr1	6720900	6721000				Chr1	17203700	17203800				Chr1	21295800	21295900
Chr1	11280000	11280100	Chr1	7811200	7811300	Chr2	3600	3700	Chr1	6722900	6723000				Chr1	17203800	17203900				Chr1	21296200	21296300
Chr1	11287600	11287700	Chr1	7852200	7852300	Chr2	3700	3800	Chr1	6723000	6723100				Chr1	17483900	17484000				Chr1	21296600	21296700
Chr1	11298500	11298600	Chr1	7960300	7960400	Chr2	3800	3900	Chr1	6736500	6736600				Chr1	17560600	17560700				Chr1	21297200	21297300
Chr1	11352300	11352400	Chr1	7960500	7960600	Chr2	3900	4000	Chr1	6744100	6744200				Chr1	17561200	17561300				Chr1	21298000	21298100
Chr1	11369700	11369800	Chr1	7960700	7960800	Chr2	4000	4100	Chr1	6759500	6759600				Chr1	17561300	17561400				Chr1	21298700	21298800
Chr1	11410100	11410200	Chr1	7960800	7960900	Chr2	4100	4200	Chr1	6906100	6906200				Chr1	17731800	17731900				Chr1	21299000	21299100
Chr1	11440900	11441000	Chr1	7960900	7961000	Chr2	4200	4300	Chr1	6906200	6906300				Chr1	17731900	17732000				Chr1	21299100	21299200
Chr1	11441000	11441100	Chr1	7961000	7961100	Chr2	4300	4400	Chr1	6906300	6906400				Chr1	17825700	17825800				Chr1	21299500	21299600
Chr1	11441100	11441200	Chr1	7976100	7976200	Chr2	4400	4500	Chr1	6906400	6906500				Chr1	17825800	17825900				Chr1	21300100	21300200
Chr1	11564700	11564800	Chr1	7985100	7985200	Chr2	4500	4600	Chr1	7023600	7023700				Chr1	17891000	17891100				Chr1	21300800	21300900
Chr1	11618500	11618600	Chr1	7985300	7985400	Chr2	4600	4700	Chr1	7035200	7035300				Chr1	17891300	17891400				Chr1	21300900	21301000
Chr1	11618600	11618700	Chr1	7986000	7986100	Chr2	4700	4800	Chr1	7035500	7035600				Chr1	17891400	17891500				Chr1	21301600	21301700
Chr1	11618700	11618800	Chr1	7986100	7986200	Chr2	4800	4900	Chr1	7036000	7036100				Chr1	17891500	17891600				Chr1	21301900	21302000
Chr1	11619100	11619200	Chr1	7986300	7986400	Chr2	4900	5000	Chr1	7036100	7036200				Chr1	17910900	17911000				Chr1	21302400	21302500
Chr1	11619200	11619300	Chr1	8016500	8016600	Chr2	5000	5100	Chr1	7036500	7036600				Chr1	18026900	18027000				Chr1	21302900	21303000
Chr1	11619300	11619400	Chr1	8053200	8053300	Chr2	5100	5200	Chr1	7036600	7036700				Chr1	18027000	18027100				Chr1	21303000	21303100
Chr1	11619400	11619500	Chr1	8053600	8053700	Chr2	5200	5300	Chr1	7036700	7036800				Chr1	18135500	18135600				Chr1	21303300	21303400
Chr1	11619500	11619600	Chr1	8053700	8053800	Chr2	5300	5400	Chr1	7065400	7065500				Chr1	18135600	18135700				Chr1	21303700	21303800
Chr1	11644300	11644400	Chr1	8053800	8053900	Chr2	5400	5500	Chr1	7075400	7075500				Chr1	18218500	18218600				Chr1	21305300	21305400
Chr1	11669400	11669500	Chr1	8115400	8115500	Chr2	5500	5600	Chr1	7077800	7077900				Chr1	18218600	18218700				Chr1	21306000	21306100
Chr1	11669500	11669600	Chr1	8116000	8116100	Chr2	5700	5800	Chr1	7132800	7132900				Chr1	18230500	18230600				Chr1	21306300	21306400
Chr1	11700600	11700700	Chr1	8160600	8160700	Chr2	5800	5900	Chr1	7132900	7133000				Chr1	18308900	18309000				Chr1	21306400	21306500
Chr1	11706500	11706600	Chr1	8160800	8160900	Chr2	5900	6000	Chr1	7201700	7201800				Chr1	18387800	18387900				Chr1	21306800	21306900
Chr1	11734700	11734800	Chr1	8169800	8169900	Chr2	6100	6200	Chr1	7201800	7201900				Chr1	18388700	18388800				Chr1	21308300	21308400
Chr1	11740600	11740700	Chr1	8201200	8201300	Chr2	6200	6300	Chr1	7201900	7202000				Chr1	18388800	18388900				Chr1	21308400	21308500
Chr1	11740700	11740800	Chr1	8205200	8205300	Chr2	6300	6400	Chr1	7241200	7241300				Chr1	18388900	18389000				Chr1	21883900	21884000
Chr1	11753600	11753700	Chr1	8237900	8238000	Chr2	6400	6500	Chr1	7241300	7241400				Chr1	18389000	18389100				Chr1	22034700	22034800
Chr1	11789600	11789700	Chr1	8238700	8238800	Chr2	6500	6600	Chr1	7241400	7241500				Chr1	18428000	18428100				Chr1	22036600	22036700
Chr1	11901400	11901500	Chr1	8267100	8267200	Chr2	6700	6800	Chr1	7251800	7251900				Chr1	18428100	18428200				Chr1	22036700	22036800
Chr1	11901500	11901600	Chr1	8267200	8267300	Chr2	6800	6900	Chr1	7251900	7252000				Chr1	18549300	18549400				Chr1	22040600	22040700
Chr1	11982900	11983000	Chr1	8267300	8267400	Chr2	7000	7100	Chr1	7255000	7255100				Chr1	18549400	18549500				Chr1	22084400	22084500
Chr1	11984500	11984600	Chr1	8267400	8267500	Chr2	7100	7200	Chr1	7255100	7255200				Chr1	18549500	18549600				Chr1	22313400	22313500
Chr1	12078100	12078200	Chr1	8267500	8267600	Chr2	7200	7300	Chr1	7256700	7256800				Chr1	18549600	18549700				Chr1	22394500	22394600
Chr1	12083800	12083900	Chr1	8276100	8276200	Chr2	7300	7400	Chr1	7257000	7257100				Chr1	18553000	18553100				Chr1	22394600	22394700
Chr1	12083900	12084000	Chr1	8276200	8276300	Chr2	7400	7500	Chr1	7257100	7257200				Chr1	18557800	18557900				Chr1	22394700	22394800
Chr1	12084000	12084100	Chr1	8277400	8277500	Chr2	7500	7600	Chr1	7257200	7257300				Chr1	18557900	18558000				Chr1	22397500	22397600
Chr1	12084200	12084300	Chr1	8277600	8277700	Chr2	7600	7700	Chr1	7281700	7281800				Chr1	18599200	18599300				Chr1	22397600	22397700
Chr1	12097500	12097600	Chr1	8283300	8283400	Chr2	7700	7800	Chr1	7281800	7281900				Chr1	18686800	18686900				Chr1	22428100	22428200
Chr1	12187000	12187100	Chr1	8289800	8289900	Chr2	7800	7900	Chr1	7282100	7282200				Chr1	18686900	18687000				Chr1	22444900	22445000
Chr1	12187100	12187200	Chr1	8289900	8290000	Chr2	7900	8000	Chr1	7282200	7282300				Chr1	19424500	19424600				Chr1	22477800	22477900
Chr1	12240700	12240800	Chr1	8290400	8290500	Chr2	8000	8100	Chr1	7282300	7282400				Chr1	19498400	19498500				Chr1	22577400	22577500
Chr1	12247600	12247700	Chr1	8374500	8374600	Chr2	8100	8200	Chr1	7282700	7282800				Chr1	19517700	19517800				Chr1	22577600	22577700
Chr1	12247700	12247800	Chr1	8374600	8374700	Chr2	8200	8300	Chr1	7283500	7283600				Chr1	19685100	19685200				Chr1	22603100	22603200
Chr1	12263200	12263300	Chr1	8375000	8375100	Chr2	8300	8400	Chr1	7283600	7283700				Chr1	19685200	19685300				Chr1	22603200	22603300
Chr1	12263300	12263400	Chr1	8409100	8409200	Chr2	8400	8500	Chr1	7283700	7283800				Chr1	19713500	19713600				Chr1	22700100	22700200
Chr1	12263400	12263500	Chr1	8453500	8453600	Chr2	8500	8600	Chr1	7283800	7283900				Chr1	19847900	19848000				Chr1	22700500	22700600
Chr1	12263600	12263700	Chr1	8453700	8453800	Chr2	8600	8700	Chr1	7283900	7284000				Chr1	19848000	19848100				Chr1	22700600	22700700
Chr1	12263700	12263800	Chr1	8454400	8454500	Chr2	8700	8800	Chr1	7313000	7313100				Chr1	19925800	19925900				Chr1	22700700	22700800
Chr1	12286700	12286800	Chr1	8454500	8454600	Chr2	8800	8900	Chr1	7344400	7344500				Chr1	19925900	19926000				Chr1	22700800	22700900
Chr1	12328200	12328300	Chr1	8455900	8456000	Chr2	8900	9000	Chr1	7352900	7353000				Chr1	19981400	19981500				Chr1	22700900	22701000
Chr1	12328300	12328400	Chr1	8457100	8457200	Chr2	9000	9100	Chr1	7353000	7353100				Chr1	19981500	19981600				Chr1	22701000	22701100
Chr1	12328700	12328800	Chr1	8457200	8457300	Chr2	9100	9200	Chr1	7353300	7353400				Chr1	20039400	20039500				Chr1	22701100	22701200
Chr1	12363400	12363500	Chr1	8457600	8457700	Chr2	9200	9300	Chr1	7356200	7356300				Chr1	20039500	20039600				Chr1	22701200	22701300
Chr1	12363500	12363600	Chr1	8458200	8458300	Chr2	9300	9400	Chr1	7356300	7356400				Chr1	20260200	20260300				Chr1	22866700	22866800
Chr1	12363600	12363700	Chr1	8475200	8475300	Chr2	9400	9500	Chr1	7356800	7356900				Chr1	20260300	20260400				Chr1	22887100	22887200
Chr1	12365100	12365200	Chr1	8489000	8489100	Chr2	9500	9600	Chr1	7357800	7357900				Chr1	20412900	20413000				Chr1	23082500	23082600
Chr1	12365200	12365300	Chr1	8489500	8489600	Chr2	10100	10200	Chr1	7358100	7358200				Chr1	20469900	20470000				Chr1	23082600	23082700
Chr1	12467300	12467400	Chr1	8513500	8513600	Chr2	10200	10300	Chr1	7358200	7358300				Chr1	20772200	20772300				Chr1	23140500	23140600
Chr1	12468200	12468300	Chr1	8513800	8513900	Chr2	10300	10400	Chr1	7362100	7362200				Chr1	20791300	20791400				Chr1	23205600	23205700
Chr1	12470300	12470400	Chr1	8538900	8539000	Chr2	10400	10500	Chr1	7364400	7364500				Chr1	21052400	21052500				Chr1	23299900	23300000
Chr1	12470400	12470500	Chr1	8539500	8539600	Chr2	12800	12900	Chr1	7364500	7364600				Chr1	21052500	21052600				Chr1	23300000	23300100
Chr1	12470500	12470600	Chr1	8539600	8539700	Chr2	12900	13000	Chr1	7365000	7365100				Chr1	21052600	21052700				Chr1	23300100	23300200
Chr1	12470600	12470700	Chr1	8543900	8544000	Chr2	13000	13100	Chr1	7365900	7366000				Chr1	21052800	21052900				Chr1	23302500	23302600
Chr1	12470700	12470800	Chr1	8577600	8577700	Chr2	14000	14100	Chr1	7392200	7392300				Chr1	21268800	21268900				Chr1	23302600	23302700
Chr1	12525600	12525700	Chr1	8578000	8578100	Chr2	49400	49500	Chr1	7392300	7392400				Chr1	21269100	21269200				Chr1	23307300	23307400
Chr1	12556200	12556300	Chr1	8591000	8591100	Chr2	67300	67400	Chr1	7392400	7392500				Chr1	21269500	21269600				Chr1	23307400	23307500
Chr1	12562900	12563000	Chr1	8622800	8622900	Chr2	241100	241200	Chr1	7393100	7393200				Chr1	21270200	21270300				Chr1	23307500	23307600
Chr1	12566500	12566600	Chr1	8644700	8644800	Chr2	303300	303400	Chr1	7393300	7393400				Chr1	21270300	21270400				Chr1	23307600	23307700
Chr1	12571400	12571500	Chr1	8681900	8682000	Chr2	543300	543400	Chr1	7522300	7522400				Chr1	21270600	21270700				Chr1	23386100	23386200
Chr1	12572400	12572500	Chr1	8723400	8723500	Chr2	571400	571500	Chr1	7541300	7541400				Chr1	21271000	21271100				Chr1	23389700	23389800
Chr1	12572500	12572600	Chr1	8733400	8733500	Chr2	612800	612900	Chr1	7604900	7605000				Chr1	21271800	21271900				Chr1	23389800	23389900
Chr1	12577800	12577900	Chr1	8741500	8741600	Chr2	706700	706800	Chr1	7665400	7665500				Chr1	21272100	21272200				Chr1	23413400	23413500
Chr1	12577900	12578000	Chr1	8766000	8766100	Chr2	706800	706900	Chr1	7665700	7665800				Chr1	21272500	21272600				Chr1	23413600	23413700
Chr1	12578100	12578200	Chr1	8766600	8766700	Chr2	826100	826200	Chr1	7665800	7665900				Chr1	21273300	21273400				Chr1	23413700	23413800
Chr1	12593200	12593300	Chr1	8766700	8766800	Chr2	846900	847000	Chr1	7712200	7712300				Chr1	21273600	21273700				Chr1	23413800	23413900
Chr1	12610800	12610900	Chr1	8766900	8767000	Chr2	849800	849900	Chr1	7714700	7714800				Chr1	21274000	21274100				Chr1	23413900	23414000
Chr1	12662800	12662900	Chr1	8767000	8767100	Chr2	852900	853000	Chr1	7714800	7714900				Chr1	21274100	21274200				Chr1	23420100	23420200
Chr1	12713500	12713600	Chr1	8767100	8767200	Chr2	1010800	1010900	Chr1	7714900	7715000				Chr1	21274800	21274900				Chr1	23420200	23420300
Chr1	12713600	12713700	Chr1	8767200	8767300	Chr2	1127400	1127500	Chr1	7717400	7717500				Chr1	21275100	21275200				Chr1	23508200	23508300
Chr1	12728200	12728300	Chr1	8771600	8771700	Chr2	1322000	1322100	Chr1	7717500	7717600				Chr1	21275600	21275700				Chr1	23508300	23508400
Chr1	12728500	12728600	Chr1	8771700	8771800	Chr2	1322100	1322200	Chr1	7719000	7719100				Chr1	21276300	21276400				Chr1	23508400	23508500
Chr1	12728600	12728700	Chr1	8771800	8771900	Chr2	1383600	1383700	Chr1	7722100	7722200				Chr1	21276400	21276500				Chr1	23559200	23559300
Chr1	12728700	12728800	Chr1	8771900	8772000	Chr2	1410000	1410100	Chr1	7722200	7722300				Chr1	21276600	21276700				Chr1	23667400	23667500
Chr1	12728800	12728900	Chr1	8772000	8772100	Chr2	1597300	1597400	Chr1	7722300	7722400				Chr1	21276700	21276800				Chr1	23667500	23667600
Chr1	12729600	12729700	Chr1	8773600	8773700	Chr2	1629800	1629900	Chr1	7722400	7722500				Chr1	21277100	21277200				Chr1	23802600	23802700
Chr1	12729700	12729800	Chr1	8773700	8773800	Chr2	1630500	1630600	Chr1	7725300	7725400				Chr1	21277800	21277900				Chr1	23933100	23933200
Chr1	12729800	12729900	Chr1	8775400	8775500	Chr2	1635000	1635100	Chr1	7725400	7725500				Chr1	21277900	21278000				Chr1	24190800	24190900
Chr1	12742800	12742900	Chr1	8775500	8775600	Chr2	1635100	1635200	Chr1	7761200	7761300				Chr1	21278100	21278200				Chr1	24487000	24487100
Chr1	12742900	12743000	Chr1	8775600	8775700	Chr2	1636500	1636600	Chr1	7761300	7761400				Chr1	21278200	21278300				Chr1	24698700	24698800
Chr1	12866100	12866200	Chr1	8775700	8775800	Chr2	1637100	1637200	Chr1	7761400	7761500				Chr1	21278600	21278700				Chr1	24714600	24714700
Chr1	12874200	12874300	Chr1	8778200	8778300	Chr2	1637200	1637300	Chr1	7761500	7761600				Chr1	21279300	21279400				Chr1	24714700	24714800
Chr1	12874300	12874400	Chr1	8778300	8778400	Chr2	1652600	1652700	Chr1	7761600	7761700				Chr1	21279400	21279500				Chr1	24714800	24714900
Chr1	12875500	12875600	Chr1	8778400	8778500	Chr2	1681500	1681600	Chr1	7761700	7761800				Chr1	21279700	21279800				Chr1	24721100	24721200
Chr1	12876300	12876400	Chr1	8778500	8778600	Chr2	1681600	1681700	Chr1	7761900	7762000				Chr1	21280100	21280200				Chr1	24721200	24721300
Chr1	12876400	12876500	Chr1	8778600	8778700	Chr2	1746700	1746800	Chr1	7762000	7762100				Chr1	21280200	21280300				Chr1	24721300	24721400
Chr1	12900000	12900100	Chr1	8778700	8778800	Chr2	1762800	1762900	Chr1	7766300	7766400				Chr1	21280900	21281000				Chr1	24721400	24721500
Chr1	12900100	12900200	Chr1	8778800	8778900	Chr2	1943100	1943200	Chr1	7783900	7784000				Chr1	21281200	21281300				Chr1	24857400	24857500
Chr1	12900200	12900300	Chr1	8778900	8779000	Chr2	1982900	1983000	Chr1	7936600	7936700				Chr1	21281700	21281800				Chr1	24884300	24884400
Chr1	12900300	12900400	Chr1	8780400	8780500	Chr2	1983000	1983100	Chr1	7960400	7960500				Chr1	21282400	21282500				Chr1	24913200	24913300
Chr1	12901500	12901600	Chr1	8781100	8781200	Chr2	2034100	2034200	Chr1	7960500	7960600				Chr1	21282500	21282600				Chr1	24921100	24921200
Chr1	12901800	12901900	Chr1	8781400	8781500	Chr2	2035100	2035200	Chr1	7960600	7960700				Chr1	21282700	21282800				Chr1	25048300	25048400
Chr1	12901900	12902000	Chr1	8781500	8781600	Chr2	2150000	2150100	Chr1	7960700	7960800				Chr1	21282800	21282900				Chr1	25048500	25048600
Chr1	12902000	12902100	Chr1	8786000	8786100	Chr2	2162600	2162700	Chr1	7960800	7960900				Chr1	21283200	21283300				Chr1	25048600	25048700
Chr1	12903000	12903100	Chr1	8786100	8786200	Chr2	2225200	2225300	Chr1	7960900	7961000				Chr1	21283900	21284000				Chr1	25048800	25048900
Chr1	12903100	12903200	Chr1	8786200	8786300	Chr2	2320700	2320800	Chr1	7961000	7961100				Chr1	21284000	21284100				Chr1	25048900	25049000
Chr1	12905500	12905600	Chr1	8787800	8787900	Chr2	2320800	2320900	Chr1	7985100	7985200				Chr1	21284300	21284400				Chr1	25049000	25049100
Chr1	12930100	12930200	Chr1	8788000	8788100	Chr2	2450400	2450500	Chr1	7986100	7986200				Chr1	21284700	21284800				Chr1	25049100	25049200
Chr1	12930200	12930300	Chr1	8789800	8789900	Chr2	2521500	2521600	Chr1	7986300	7986400				Chr1	21285500	21285600				Chr1	25049200	25049300
Chr1	12930300	12930400	Chr1	8789900	8790000	Chr2	2522200	2522300	Chr1	7986400	7986500				Chr1	21285800	21285900				Chr1	25394400	25394500
Chr1	12942600	12942700	Chr1	8790000	8790100	Chr2	2522300	2522400	Chr1	8016500	8016600				Chr1	21286300	21286400				Chr1	25394500	25394600
Chr1	12959800	12959900	Chr1	8790100	8790200	Chr2	2538900	2539000	Chr1	8114800	8114900				Chr1	21287000	21287100				Chr1	25757700	25757800
Chr1	12977000	12977100	Chr1	8790200	8790300	Chr2	2539200	2539300	Chr1	8115300	8115400				Chr1	21287100	21287200				Chr1	25829600	25829700
Chr1	13016500	13016600	Chr1	8798200	8798300	Chr2	2553700	2553800	Chr1	8115400	8115500				Chr1	21287300	21287400				Chr1	25926900	25927000
Chr1	13016900	13017000	Chr1	8798300	8798400	Chr2	2570400	2570500	Chr1	8115700	8115800				Chr1	21287400	21287500				Chr1	25928100	25928200
Chr1	13085500	13085600	Chr1	8800700	8800800	Chr2	2603300	2603400	Chr1	8116000	8116100				Chr1	21287800	21287900				Chr1	25928200	25928300
Chr1	13085600	13085700	Chr1	8800800	8800900	Chr2	2604500	2604600	Chr1	8116100	8116200				Chr1	21288500	21288600				Chr1	25932100	25932200
Chr1	13087400	13087500	Chr1	8800900	8801000	Chr2	2604600	2604700	Chr1	8116200	8116300				Chr1	21288600	21288700				Chr1	25941100	25941200
Chr1	13108700	13108800	Chr1	8801000	8801100	Chr2	2604700	2604800	Chr1	8116500	8116600				Chr1	21288900	21289000				Chr1	26049400	26049500
Chr1	13167100	13167200	Chr1	8801100	8801200	Chr2	2604900	2605000	Chr1	8116600	8116700				Chr1	21289300	21289400				Chr1	26049500	26049600
Chr1	13167200	13167300	Chr1	8801200	8801300	Chr2	2605000	2605100	Chr1	8154200	8154300				Chr1	21290400	21290500				Chr1	26189900	26190000
Chr1	13171100	13171200	Chr1	8801300	8801400	Chr2	2605300	2605400	Chr1	8190400	8190500				Chr1	21291400	21291500				Chr1	26382100	26382200
Chr1	13201600	13201700	Chr1	8801400	8801500	Chr2	2605400	2605500	Chr1	8205200	8205300				Chr1	21291500	21291600				Chr1	26382200	26382300
Chr1	13224200	13224300	Chr1	8801800	8801900	Chr2	2605700	2605800	Chr1	8252500	8252600				Chr1	21291700	21291800				Chr1	26429800	26429900
Chr1	13242100	13242200	Chr1	8802900	8803000	Chr2	2606100	2606200	Chr1	8254800	8254900				Chr1	21291800	21291900				Chr1	27339700	27339800
Chr1	13242200	13242300	Chr1	8803500	8803600	Chr2	2606400	2606500	Chr1	8267400	8267500				Chr1	21292200	21292300				Chr1	27393300	27393400
Chr1	13242500	13242600	Chr1	8803600	8803700	Chr2	2606500	2606600	Chr1	8267500	8267600				Chr1	21293300	21293400				Chr1	27393400	27393500
Chr1	13242600	13242700	Chr1	8803800	8803900	Chr2	2892200	2892300	Chr1	8272500	8272600				Chr1	21294300	21294400				Chr1	27688100	27688200
Chr1	13242700	13242800	Chr1	8803900	8804000	Chr2	2963800	2963900	Chr1	8276600	8276700				Chr1	21294400	21294500				Chr1	27863700	27863800
Chr1	13244000	13244100	Chr1	8804000	8804100	Chr2	2963900	2964000	Chr1	8277300	8277400				Chr1	21294600	21294700				Chr1	27984700	27984800
Chr1	13248100	13248200	Chr1	8804100	8804200	Chr2	3020500	3020600	Chr1	8277400	8277500				Chr1	21295100	21295200				Chr1	27984800	27984900
Chr1	13248200	13248300	Chr1	8808500	8808600	Chr2	3186700	3186800	Chr1	8277600	8277700				Chr1	21295800	21295900				Chr1	28020300	28020400
Chr1	13250600	13250700	Chr1	8808600	8808700	Chr2	3197700	3197800	Chr1	8289500	8289600				Chr1	21296200	21296300				Chr1	28020400	28020500
Chr1	13250700	13250800	Chr1	8808800	8808900	Chr2	3250600	3250700	Chr1	8289800	8289900				Chr1	21296600	21296700				Chr1	28028000	28028100
Chr1	13257000	13257100	Chr1	8808900	8809000	Chr2	3250700	3250800	Chr1	8290400	8290500				Chr1	21297200	21297300				Chr1	28184500	28184600
Chr1	13313600	13313700	Chr1	8810600	8810700	Chr2	3331600	3331700	Chr1	8290800	8290900				Chr1	21298000	21298100				Chr1	28212400	28212500
Chr1	13407400	13407500	Chr1	8812300	8812400	Chr2	3331700	3331800	Chr1	8290900	8291000				Chr1	21298700	21298800				Chr1	28212500	28212600
Chr1	13487000	13487100	Chr1	8812400	8812500	Chr2	3331800	3331900	Chr1	8291500	8291600				Chr1	21299000	21299100				Chr1	28212600	28212700
Chr1	13509300	13509400	Chr1	8812500	8812600	Chr2	3331900	3332000	Chr1	8319600	8319700				Chr1	21299100	21299200				Chr1	28373500	28373600
Chr1	13511200	13511300	Chr1	8812600	8812700	Chr2	3332000	3332100	Chr1	8374500	8374600				Chr1	21299500	21299600				Chr1	28407900	28408000
Chr1	13511600	13511700	Chr1	8815100	8815200	Chr2	3333700	3333800	Chr1	8374600	8374700				Chr1	21300100	21300200				Chr1	28408000	28408100
Chr1	13513600	13513700	Chr1	8815200	8815300	Chr2	3369300	3369400	Chr1	8374900	8375000				Chr1	21300800	21300900				Chr1	28440900	28441000
Chr1	13513700	13513800	Chr1	8815300	8815400	Chr2	3414800	3414900	Chr1	8375000	8375100				Chr1	21300900	21301000				Chr1	28520000	28520100
Chr1	13513800	13513900	Chr1	8815400	8815500	Chr2	3424800	3424900	Chr1	8453500	8453600				Chr1	21301600	21301700				Chr1	28544500	28544600
Chr1	13514200	13514300	Chr1	8815500	8815600	Chr2	3437500	3437600	Chr1	8453600	8453700				Chr1	21301900	21302000				Chr1	28587100	28587200
Chr1	13523000	13523100	Chr1	8815600	8815700	Chr2	3437600	3437700	Chr1	8454400	8454500				Chr1	21302400	21302500				Chr1	28587200	28587300
Chr1	13524400	13524500	Chr1	8815700	8815800	Chr2	3468500	3468600	Chr1	8454500	8454600				Chr1	21302900	21303000				Chr1	28777400	28777500
Chr1	13568600	13568700	Chr1	8815800	8815900	Chr2	3468600	3468700	Chr1	8455900	8456000				Chr1	21303000	21303100				Chr1	28889300	28889400
Chr1	13568900	13569000	Chr1	8816200	8816300	Chr2	3468700	3468800	Chr1	8456700	8456800				Chr1	21303300	21303400				Chr1	28889400	28889500
Chr1	13569000	13569100	Chr1	8817300	8817400	Chr2	3489400	3489500	Chr1	8456900	8457000				Chr1	21303700	21303800				Chr1	28889800	28889900
Chr1	13569100	13569200	Chr1	8818000	8818100	Chr2	3489500	3489600	Chr1	8457100	8457200				Chr1	21303800	21303900				Chr1	28947500	28947600
Chr1	13569200	13569300	Chr1	8818200	8818300	Chr2	3495400	3495500	Chr1	8457200	8457300				Chr1	21305300	21305400				Chr1	29002200	29002300
Chr1	13569300	13569400	Chr1	8818300	8818400	Chr2	3495500	3495600	Chr1	8457600	8457700				Chr1	21306000	21306100				Chr1	29143000	29143100
Chr1	13639200	13639300	Chr1	8818400	8818500	Chr2	3495800	3495900	Chr1	8457800	8457900				Chr1	21306300	21306400				Chr1	29143100	29143200
Chr1	13648400	13648500	Chr1	8822900	8823000	Chr2	3495900	3496000	Chr1	8461600	8461700				Chr1	21306400	21306500				Chr1	29346600	29346700
Chr1	13648500	13648600	Chr1	8823000	8823100	Chr2	3503500	3503600	Chr1	8488900	8489000				Chr1	21306800	21306900				Chr1	29422500	29422600
Chr1	13650400	13650500	Chr1	8823100	8823200	Chr2	3540100	3540200	Chr1	8489600	8489700				Chr1	21308300	21308400				Chr1	29486800	29486900
Chr1	13650500	13650600	Chr1	8823300	8823400	Chr2	3562900	3563000	Chr1	8490400	8490500				Chr1	21308400	21308500				Chr1	29525200	29525300
Chr1	13651400	13651500	Chr1	8824700	8824800	Chr2	3606200	3606300	Chr1	8495200	8495300				Chr1	21385300	21385400				Chr1	29736100	29736200
Chr1	13651500	13651600	Chr1	8824900	8825000	Chr2	3607100	3607200	Chr1	8538900	8539000				Chr1	21780100	21780200				Chr1	29736700	29736800
Chr1	13652600	13652700	Chr1	8825000	8825100	Chr2	3607300	3607400	Chr1	8539600	8539700				Chr1	21796800	21796900				Chr1	29736800	29736900
Chr1	13653500	13653600	Chr1	8826700	8826800	Chr2	3614900	3615000	Chr1	8543900	8544000				Chr1	21883800	21883900				Chr1	29833100	29833200
Chr1	13660100	13660200	Chr1	8826800	8826900	Chr2	3615000	3615100	Chr1	8578000	8578100				Chr1	21883900	21884000				Chr1	29833700	29833800
Chr1	13660200	13660300	Chr1	8826900	8827000	Chr2	3615300	3615400	Chr1	8591200	8591300				Chr1	22040600	22040700				Chr1	29911600	29911700
Chr1	13660700	13660800	Chr1	8827000	8827100	Chr2	3615600	3615700	Chr1	8591300	8591400				Chr1	22084100	22084200				Chr1	29911700	29911800
Chr1	13660900	13661000	Chr1	8829500	8829600	Chr2	3615700	3615800	Chr1	8622800	8622900				Chr1	22084300	22084400				Chr1	29911800	29911900
Chr1	13661000	13661100	Chr1	8829600	8829700	Chr2	3615800	3615900	Chr1	8681900	8682000				Chr1	22084400	22084500				Chr1	29925100	29925200
Chr1	13661200	13661300	Chr1	8829700	8829800	Chr2	3615900	3616000	Chr1	8682000	8682100				Chr1	22084500	22084600				Chr1	30081100	30081200
Chr1	13661300	13661400	Chr1	8829800	8829900	Chr2	3616000	3616100	Chr1	8682100	8682200				Chr1	22084600	22084700				Chr1	30081200	30081300
Chr1	13661500	13661600	Chr1	8829900	8830000	Chr2	3616300	3616400	Chr1	8723300	8723400				Chr1	22084700	22084800				Chr1	30084000	30084100
Chr1	13661600	13661700	Chr1	8830000	8830100	Chr2	3616400	3616500	Chr1	8723400	8723500				Chr1	22084800	22084900				Chr1	30237700	30237800
Chr1	13661700	13661800	Chr1	8830100	8830200	Chr2	3616500	3616600	Chr1	8733400	8733500				Chr1	22149800	22149900				Chr1	30237800	30237900
Chr1	13661800	13661900	Chr1	8830200	8830300	Chr2	3616600	3616700	Chr1	8741500	8741600				Chr1	22313300	22313400				Chr1	30403900	30404000
Chr1	13661900	13662000	Chr1	8831700	8831800	Chr2	3616700	3616800	Chr1	8765600	8765700				Chr1	22313400	22313500				Chr2	2700	2800
Chr1	13662400	13662500	Chr1	8832400	8832500	Chr2	3617200	3617300	Chr1	8765900	8766000				Chr1	22394500	22394600				Chr2	3000	3100
Chr1	13662500	13662600	Chr1	8832600	8832700	Chr2	3617300	3617400	Chr1	8766600	8766700				Chr1	22394600	22394700				Chr2	3100	3200
Chr1	13662800	13662900	Chr1	8832700	8832800	Chr2	3617700	3617800	Chr1	8766700	8766800				Chr1	22394700	22394800				Chr2	3200	3300
Chr1	13662900	13663000	Chr1	8832800	8832900	Chr2	3618000	3618100	Chr1	8766800	8766900				Chr1	22397500	22397600				Chr2	3300	3400
Chr1	13663300	13663400	Chr1	8837300	8837400	Chr2	3618100	3618200	Chr1	8767000	8767100				Chr1	22397600	22397700				Chr2	3600	3700
Chr1	13663400	13663500	Chr1	8927700	8927800	Chr2	3618200	3618300	Chr1	8767100	8767200				Chr1	22428100	22428200				Chr2	3700	3800
Chr1	13663500	13663600	Chr1	8936100	8936200	Chr2	3618300	3618400	Chr1	8767200	8767300				Chr1	22428200	22428300				Chr2	3800	3900
Chr1	13663600	13663700	Chr1	8936200	8936300	Chr2	3618400	3618500	Chr1	8767300	8767400				Chr1	22428300	22428400				Chr2	3900	4000
Chr1	13663900	13664000	Chr1	9004800	9004900	Chr2	3619200	3619300	Chr1	8771700	8771800				Chr1	22477700	22477800				Chr2	4000	4100
Chr1	13664700	13664800	Chr1	9004900	9005000	Chr2	3619500	3619600	Chr1	8772000	8772100				Chr1	22477800	22477900				Chr2	4100	4200
Chr1	13664800	13664900	Chr1	9005000	9005100	Chr2	3619700	3619800	Chr1	8772600	8772700				Chr1	22577600	22577700				Chr2	4200	4300
Chr1	13664900	13665000	Chr1	9005200	9005300	Chr2	3619900	3620000	Chr1	8773000	8773100				Chr1	22603100	22603200				Chr2	4300	4400
Chr1	13666100	13666200	Chr1	9005700	9005800	Chr2	3620000	3620100	Chr1	8775400	8775500				Chr1	22603200	22603300				Chr2	4400	4500
Chr1	13667200	13667300	Chr1	9006200	9006300	Chr2	3620300	3620400	Chr1	8775500	8775600				Chr1	22795600	22795700				Chr2	4500	4600
Chr1	13675500	13675600	Chr1	9008500	9008600	Chr2	3620500	3620600	Chr1	8775600	8775700				Chr1	22795700	22795800				Chr2	4600	4700
Chr1	13711200	13711300	Chr1	9010500	9010600	Chr2	3620600	3620700	Chr1	8775700	8775800				Chr1	22795800	22795900				Chr2	4700	4800
Chr1	13711300	13711400	Chr1	9011200	9011300	Chr2	3620700	3620800	Chr1	8775800	8775900				Chr1	22866700	22866800				Chr2	4800	4900
Chr1	13711500	13711600	Chr1	9015400	9015500	Chr2	3620800	3620900	Chr1	8778200	8778300				Chr1	22871200	22871300				Chr2	4900	5000
Chr1	13712100	13712200	Chr1	9015500	9015600	Chr2	3620900	3621000	Chr1	8778300	8778400				Chr1	22887100	22887200				Chr2	5000	5100
Chr1	13712200	13712300	Chr1	9015600	9015700	Chr2	3621100	3621200	Chr1	8778600	8778700				Chr1	22930100	22930200				Chr2	5100	5200
Chr1	13769100	13769200	Chr1	9018300	9018400	Chr2	3621200	3621300	Chr1	8778800	8778900				Chr1	22945600	22945700				Chr2	5200	5300
Chr1	13769200	13769300	Chr1	9062200	9062300	Chr2	3621500	3621600	Chr1	8778900	8779000				Chr1	23140500	23140600				Chr2	5300	5400
Chr1	13769300	13769400	Chr1	9062400	9062500	Chr2	3621800	3621900	Chr1	8779300	8779400				Chr1	23178000	23178100				Chr2	5400	5500
Chr1	13773000	13773100	Chr1	9077600	9077700	Chr2	3621900	3622000	Chr1	8779500	8779600				Chr1	23178100	23178200				Chr2	5500	5600
Chr1	13773100	13773200	Chr1	9077700	9077800	Chr2	3622000	3622100	Chr1	8780000	8780100				Chr1	23178200	23178300				Chr2	5700	5800
Chr1	13773200	13773300	Chr1	9126400	9126500	Chr2	3622100	3622200	Chr1	8780200	8780300				Chr1	23178300	23178400				Chr2	5800	5900
Chr1	13773300	13773400	Chr1	9126500	9126600	Chr2	3622200	3622300	Chr1	8780300	8780400				Chr1	23178400	23178500				Chr2	5900	6000
Chr1	13773400	13773500	Chr1	9138200	9138300	Chr2	3622600	3622700	Chr1	8781000	8781100				Chr1	23178500	23178600				Chr2	6000	6100
Chr1	13773500	13773600	Chr1	9138300	9138400	Chr2	3623100	3623200	Chr1	8781400	8781500				Chr1	23205600	23205700				Chr2	6100	6200
Chr1	13773600	13773700	Chr1	9205100	9205200	Chr2	3623300	3623400	Chr1	8781500	8781600				Chr1	23205700	23205800				Chr2	6200	6300
Chr1	13773700	13773800	Chr1	9205300	9205400	Chr2	3623700	3623800	Chr1	8781600	8781700				Chr1	23205800	23205900				Chr2	6300	6400
Chr1	13773900	13774000	Chr1	9236000	9236100	Chr2	3624500	3624600	Chr1	8781700	8781800				Chr1	23205900	23206000				Chr2	6400	6500
Chr1	13774000	13774100	Chr1	9304800	9304900	Chr2	3624600	3624700	Chr1	8786100	8786200				Chr1	23299600	23299700				Chr2	6500	6600
Chr1	13774100	13774200	Chr1	9304900	9305000	Chr2	3625200	3625300	Chr1	8787000	8787100				Chr1	23299700	23299800				Chr2	6600	6700
Chr1	13774300	13774400	Chr1	9305000	9305100	Chr2	3625300	3625400	Chr1	8787400	8787500				Chr1	23299800	23299900				Chr2	6700	6800
Chr1	13774400	13774500	Chr1	9305600	9305700	Chr2	3625400	3625500	Chr1	8789800	8789900				Chr1	23299900	23300000				Chr2	6800	6900
Chr1	13774500	13774600	Chr1	9305700	9305800	Chr2	3625600	3625700	Chr1	8790000	8790100				Chr1	23300000	23300100				Chr2	6900	7000
Chr1	13774600	13774700	Chr1	9368000	9368100	Chr2	3625700	3625800	Chr1	8790100	8790200				Chr1	23300100	23300200				Chr2	7000	7100
Chr1	13774700	13774800	Chr1	9384200	9384300	Chr2	3625900	3626000	Chr1	8790200	8790300				Chr1	23300200	23300300				Chr2	7100	7200
Chr1	13774800	13774900	Chr1	9384300	9384400	Chr2	3626000	3626100	Chr1	8790300	8790400				Chr1	23300300	23300400				Chr2	7200	7300
Chr1	13776600	13776700	Chr1	9384400	9384500	Chr2	3626200	3626300	Chr1	8798000	8798100				Chr1	23300700	23300800				Chr2	7300	7400
Chr1	13777500	13777600	Chr1	9384900	9385000	Chr2	3627000	3627100	Chr1	8798100	8798200				Chr1	23302100	23302200				Chr2	7400	7500
Chr1	13786800	13786900	Chr1	9385000	9385100	Chr2	3627100	3627200	Chr1	8798200	8798300				Chr1	23302200	23302300				Chr2	7500	7600
Chr1	13786900	13787000	Chr1	9564800	9564900	Chr2	3627200	3627300	Chr1	8798300	8798400				Chr1	23302300	23302400				Chr2	7600	7700
Chr1	13787100	13787200	Chr1	9564900	9565000	Chr2	3627300	3627400	Chr1	8800900	8801000				Chr1	23302400	23302500				Chr2	7700	7800
Chr1	13787200	13787300	Chr1	9565000	9565100	Chr2	3718100	3718200	Chr1	8801000	8801100				Chr1	23302500	23302600				Chr2	7800	7900
Chr1	13787300	13787400	Chr1	9572500	9572600	Chr2	3718200	3718300	Chr1	8801100	8801200				Chr1	23302600	23302700				Chr2	7900	8000
Chr1	13787600	13787700	Chr1	9574400	9574500	Chr2	3740900	3741000	Chr1	8801300	8801400				Chr1	23302800	23302900				Chr2	8000	8100
Chr1	13788300	13788400	Chr1	9630300	9630400	Chr2	4086400	4086500	Chr1	8801400	8801500				Chr1	23307200	23307300				Chr2	8100	8200
Chr1	13788900	13789000	Chr1	9630600	9630700	Chr2	4086500	4086600	Chr1	8801800	8801900				Chr1	23307300	23307400				Chr2	8200	8300
Chr1	13791800	13791900	Chr1	9676600	9676700	Chr2	4142300	4142400	Chr1	8802000	8802100				Chr1	23307400	23307500				Chr2	8300	8400
Chr1	13793100	13793200	Chr1	9676700	9676800	Chr2	4142400	4142500	Chr1	8802500	8802600				Chr1	23307500	23307600				Chr2	8400	8500
Chr1	13793800	13793900	Chr1	9676800	9676900	Chr2	4222200	4222300	Chr1	8802800	8802900				Chr1	23307600	23307700				Chr2	8500	8600
Chr1	13793900	13794000	Chr1	9677100	9677200	Chr2	4237000	4237100	Chr1	8802900	8803000				Chr1	23307700	23307800				Chr2	8600	8700
Chr1	13794300	13794400	Chr1	9680200	9680300	Chr2	4355700	4355800	Chr1	8803500	8803600				Chr1	23307800	23307900				Chr2	8700	8800
Chr1	13796600	13796700	Chr1	9680900	9681000	Chr2	4563500	4563600	Chr1	8803600	8803700				Chr1	23345300	23345400				Chr2	8800	8900
Chr1	13796700	13796800	Chr1	9681000	9681100	Chr2	4563600	4563700	Chr1	8803700	8803800				Chr1	23345400	23345500				Chr2	8900	9000
Chr1	13797500	13797600	Chr1	9682300	9682400	Chr2	4565100	4565200	Chr1	8803900	8804000				Chr1	23385900	23386000				Chr2	9000	9100
Chr1	13797700	13797800	Chr1	9682400	9682500	Chr2	4565200	4565300	Chr1	8804000	8804100				Chr1	23386100	23386200				Chr2	9100	9200
Chr1	13798000	13798100	Chr1	9683400	9683500	Chr2	4759200	4759300	Chr1	8804100	8804200				Chr1	23386300	23386400				Chr2	9200	9300
Chr1	13799700	13799800	Chr1	9683500	9683600	Chr2	4938500	4938600	Chr1	8804200	8804300				Chr1	23386400	23386500				Chr2	9300	9400
Chr1	13799800	13799900	Chr1	9683600	9683700	Chr2	5052400	5052500	Chr1	8808600	8808700				Chr1	23386500	23386600				Chr2	9400	9500
Chr1	13799900	13800000	Chr1	9687000	9687100	Chr2	5221000	5221100	Chr1	8808900	8809000				Chr1	23389300	23389400				Chr2	9500	9600
Chr1	13800000	13800100	Chr1	9687500	9687600	Chr2	5224600	5224700	Chr1	8809500	8809600				Chr1	23389400	23389500				Chr2	102000	102100
Chr1	13811000	13811100	Chr1	9689800	9689900	Chr2	5229800	5229900	Chr1	8809900	8810000				Chr1	23389500	23389600				Chr2	693900	694000
Chr1	13828600	13828700	Chr1	9690300	9690400	Chr2	5236900	5237000	Chr1	8812300	8812400				Chr1	23389600	23389700				Chr2	694000	694100
Chr1	13828700	13828800	Chr1	9691000	9691100	Chr2	5332200	5332300	Chr1	8812400	8812500				Chr1	23389700	23389800				Chr2	706700	706800
Chr1	13828800	13828900	Chr1	9691100	9691200	Chr2	5509600	5509700	Chr1	8812500	8812600				Chr1	23389800	23389900				Chr2	706800	706900
Chr1	13829400	13829500	Chr1	9691200	9691300	Chr2	5557400	5557500	Chr1	8812600	8812700				Chr1	23389900	23390000				Chr2	771400	771500
Chr1	13829500	13829600	Chr1	9707900	9708000	Chr2	5558100	5558200	Chr1	8812700	8812800				Chr1	23390000	23390100				Chr2	771500	771600
Chr1	13829600	13829700	Chr1	9746500	9746600	Chr2	5590000	5590100	Chr1	8815100	8815200				Chr1	23390100	23390200				Chr2	820800	820900
Chr1	13831000	13831100	Chr1	9754400	9754500	Chr2	5691400	5691500	Chr1	8815200	8815300				Chr1	23413400	23413500				Chr2	821500	821600
Chr1	13832000	13832100	Chr1	9754500	9754600	Chr2	5691500	5691600	Chr1	8815300	8815400				Chr1	23413500	23413600				Chr2	846900	847000
Chr1	13851200	13851300	Chr1	9754600	9754700	Chr2	5780300	5780400	Chr1	8815500	8815600				Chr1	23413600	23413700				Chr2	849700	849800
Chr1	13863100	13863200	Chr1	9754800	9754900	Chr2	5785700	5785800	Chr1	8815700	8815800				Chr1	23413700	23413800				Chr2	849800	849900
Chr1	13863300	13863400	Chr1	9755100	9755200	Chr2	5785800	5785900	Chr1	8815800	8815900				Chr1	23413800	23413900				Chr2	849900	850000
Chr1	13863600	13863700	Chr1	9755200	9755300	Chr2	5786800	5786900	Chr1	8816200	8816300				Chr1	23413900	23414000				Chr2	852800	852900
Chr1	13863700	13863800	Chr1	9755500	9755600	Chr2	5804700	5804800	Chr1	8816400	8816500				Chr1	23414000	23414100				Chr2	852900	853000
Chr1	13863800	13863900	Chr1	9755700	9755800	Chr2	5806800	5806900	Chr1	8816900	8817000				Chr1	23414100	23414200				Chr2	853000	853100
Chr1	13864100	13864200	Chr1	9755800	9755900	Chr2	5807800	5807900	Chr1	8817100	8817200				Chr1	23419900	23420000				Chr2	1054700	1054800
Chr1	13864200	13864300	Chr1	9755900	9756000	Chr2	5812400	5812500	Chr1	8817200	8817300				Chr1	23420000	23420100				Chr2	1114000	1114100
Chr1	13864300	13864400	Chr1	9756000	9756100	Chr2	5823100	5823200	Chr1	8817900	8818000				Chr1	23420100	23420200				Chr2	1799300	1799400
Chr1	13864400	13864500	Chr1	9756100	9756200	Chr2	5871500	5871600	Chr1	8818100	8818200				Chr1	23420200	23420300				Chr2	1799400	1799500
Chr1	13864500	13864600	Chr1	9756200	9756300	Chr2	5871600	5871700	Chr1	8818300	8818400				Chr1	23420300	23420400				Chr2	1799500	1799600
Chr1	13870200	13870300	Chr1	9756400	9756500	Chr2	6016900	6017000	Chr1	8818400	8818500				Chr1	23420700	23420800				Chr2	1799600	1799700
Chr1	13870300	13870400	Chr1	9756500	9756600	Chr2	6130800	6130900	Chr1	8818500	8818600				Chr1	23420800	23420900				Chr2	1799700	1799800
Chr1	13881400	13881500	Chr1	9756800	9756900	Chr2	6177000	6177100	Chr1	8818600	8818700				Chr1	23489400	23489500				Chr2	1799800	1799900
Chr1	13881500	13881600	Chr1	9759700	9759800	Chr2	6206100	6206200	Chr1	8823000	8823100				Chr1	23489500	23489600				Chr2	1799900	1800000
Chr1	13883700	13883800	Chr1	9759800	9759900	Chr2	6206700	6206800	Chr1	8823900	8824000				Chr1	23490300	23490400				Chr2	1800000	1800100
Chr1	13884000	13884100	Chr1	9759900	9760000	Chr2	6268800	6268900	Chr1	8824300	8824400				Chr1	23490400	23490500				Chr2	1823400	1823500
Chr1	13884700	13884800	Chr1	9812000	9812100	Chr2	6270100	6270200	Chr1	8826700	8826800				Chr1	23490500	23490600				Chr2	1823500	1823600
Chr1	13884800	13884900	Chr1	9816800	9816900	Chr2	6415300	6415400	Chr1	8826900	8827000				Chr1	23490600	23490700				Chr2	1823600	1823700
Chr1	13884900	13885000	Chr1	9816900	9817000	Chr2	6602200	6602300	Chr1	8827000	8827100				Chr1	23490700	23490800				Chr2	1823700	1823800
Chr1	13885100	13885200	Chr1	9817400	9817500	Chr2	6602400	6602500	Chr1	8827100	8827200				Chr1	23508000	23508100				Chr2	1823800	1823900
Chr1	13885200	13885300	Chr1	9817500	9817600	Chr2	6680200	6680300	Chr1	8829500	8829600				Chr1	23508100	23508200				Chr2	1823900	1824000
Chr1	13885300	13885400	Chr1	9852800	9852900	Chr2	6680700	6680800	Chr1	8829600	8829700				Chr1	23508200	23508300				Chr2	1824000	1824100
Chr1	13885400	13885500	Chr1	9862600	9862700	Chr2	6716100	6716200	Chr1	8829700	8829800				Chr1	23508300	23508400				Chr2	1967500	1967600
Chr1	13885500	13885600	Chr1	9862700	9862800	Chr2	6733100	6733200	Chr1	8829800	8829900				Chr1	23508400	23508500				Chr2	1967600	1967700
Chr1	13885600	13885700	Chr1	9866100	9866200	Chr2	6761100	6761200	Chr1	8829900	8830000				Chr1	23508500	23508600				Chr2	1967700	1967800
Chr1	13885900	13886000	Chr1	9866500	9866600	Chr2	6854400	6854500	Chr1	8830100	8830200				Chr1	23508600	23508700				Chr2	1993700	1993800
Chr1	13886000	13886100	Chr1	9866600	9866700	Chr2	6903000	6903100	Chr1	8830200	8830300				Chr1	23508700	23508800				Chr2	2026500	2026600
Chr1	13886100	13886200	Chr1	9884000	9884100	Chr2	6924000	6924100	Chr1	8830500	8830600				Chr1	23559200	23559300				Chr2	2026700	2026800
Chr1	13886300	13886400	Chr1	9915300	9915400	Chr2	6972500	6972600	Chr1	8830800	8830900				Chr1	23667400	23667500				Chr2	2026800	2026900
Chr1	13886400	13886500	Chr1	9915400	9915500	Chr2	6974600	6974700	Chr1	8831500	8831600				Chr1	23667500	23667600				Chr2	2026900	2027000
Chr1	13886800	13886900	Chr1	9915500	9915600	Chr2	6974700	6974800	Chr1	8832300	8832400				Chr1	23701200	23701300				Chr2	2027000	2027100
Chr1	13887500	13887600	Chr1	9916200	9916300	Chr2	6974800	6974900	Chr1	8832400	8832500				Chr1	23701300	23701400				Chr2	2184800	2184900
Chr1	13888100	13888200	Chr1	9916300	9916400	Chr2	7153600	7153700	Chr1	8832700	8832800				Chr1	23802500	23802600				Chr2	2587800	2587900
Chr1	13888200	13888300	Chr1	9916400	9916500	Chr2	7169000	7169100	Chr1	8832900	8833000				Chr1	23802600	23802700				Chr2	2587900	2588000
Chr1	13889300	13889400	Chr1	10021900	10022000	Chr2	7176400	7176500	Chr1	8927700	8927800				Chr1	23933100	23933200				Chr2	2588000	2588100
Chr1	13889500	13889600	Chr1	10023100	10023200	Chr2	7191000	7191100	Chr1	9004800	9004900				Chr1	24190800	24190900				Chr2	2588200	2588300
Chr1	13890400	13890500	Chr1	10023200	10023300	Chr2	7191200	7191300	Chr1	9004900	9005000				Chr1	24190900	24191000				Chr2	3186700	3186800
Chr1	13890500	13890600	Chr1	10023300	10023400	Chr2	7191400	7191500	Chr1	9005000	9005100				Chr1	24276300	24276400				Chr2	3187100	3187200
Chr1	13890700	13890800	Chr1	10023400	10023500	Chr2	7960700	7960800	Chr1	9005200	9005300				Chr1	24448000	24448100				Chr2	3187200	3187300
Chr1	13890800	13890900	Chr1	10152700	10152800	Chr2	7963700	7963800	Chr1	9005300	9005400				Chr1	24486900	24487000				Chr2	3187400	3187500
Chr1	13907800	13907900	Chr1	10152800	10152900	Chr2	8103200	8103300	Chr1	9008400	9008500				Chr1	24487000	24487100				Chr2	3187900	3188000
Chr1	13907900	13908000	Chr1	10152900	10153000	Chr2	8103300	8103400	Chr1	9008500	9008600				Chr1	24714600	24714700				Chr2	3188800	3188900
Chr1	13913200	13913300	Chr1	10156600	10156700	Chr2	8157700	8157800	Chr1	9008900	9009000				Chr1	24714700	24714800				Chr2	3250600	3250700
Chr1	13917600	13917700	Chr1	10197000	10197100	Chr2	8420600	8420700	Chr1	9009700	9009800				Chr1	24714800	24714900				Chr2	3250700	3250800
Chr1	13917700	13917800	Chr1	10197100	10197200	Chr2	8421100	8421200	Chr1	9010200	9010300				Chr1	24721000	24721100				Chr2	3251600	3251700
Chr1	13918300	13918400	Chr1	10314700	10314800	Chr2	8555700	8555800	Chr1	9013500	9013600				Chr1	24721100	24721200				Chr2	3251700	3251800
Chr1	13921100	13921200	Chr1	10314800	10314900	Chr2	8802100	8802200	Chr1	9014900	9015000				Chr1	24721200	24721300				Chr2	3251800	3251900
Chr1	13921200	13921300	Chr1	10315100	10315200	Chr2	8854400	8854500	Chr1	9015000	9015100				Chr1	24721300	24721400				Chr2	3251900	3252000
Chr1	13921400	13921500	Chr1	10347900	10348000	Chr2	8914100	8914200	Chr1	9015100	9015200				Chr1	24721400	24721500				Chr2	3252000	3252100
Chr1	13922000	13922100	Chr1	10348300	10348400	Chr2	8914200	8914300	Chr1	9015300	9015400				Chr1	24721500	24721600				Chr2	3252100	3252200
Chr1	13926100	13926200	Chr1	10383400	10383500	Chr2	8914500	8914600	Chr1	9015400	9015500				Chr1	24857400	24857500				Chr2	3270700	3270800
Chr1	13926200	13926300	Chr1	10383900	10384000	Chr2	8914800	8914900	Chr1	9015500	9015600				Chr1	24857500	24857600				Chr2	3274300	3274400
Chr1	13926400	13926500	Chr1	10384000	10384100	Chr2	8915100	8915200	Chr1	9062200	9062300				Chr1	24870400	24870500				Chr2	3276500	3276600
Chr1	13926800	13926900	Chr1	10384100	10384200	Chr2	8915400	8915500	Chr1	9062400	9062500				Chr1	24874300	24874400				Chr2	3276600	3276700
Chr1	13926900	13927000	Chr1	10384200	10384300	Chr2	8915700	8915800	Chr1	9077600	9077700				Chr1	24884000	24884100				Chr2	3276700	3276800
Chr1	13927100	13927200	Chr1	10421400	10421500	Chr2	8916000	8916100	Chr1	9077700	9077800				Chr1	24884100	24884200				Chr2	3280800	3280900
Chr1	13932100	13932200	Chr1	10421500	10421600	Chr2	8916400	8916500	Chr1	9082800	9082900				Chr1	24884300	24884400				Chr2	3311700	3311800
Chr1	13932200	13932300	Chr1	10444000	10444100	Chr2	8917300	8917400	Chr1	9138200	9138300				Chr1	25048300	25048400				Chr2	3313700	3313800
Chr1	13932300	13932400	Chr1	10490700	10490800	Chr2	8931700	8931800	Chr1	9138300	9138400				Chr1	25048500	25048600				Chr2	3313800	3313900
Chr1	13932500	13932600	Chr1	10490800	10490900	Chr2	9048400	9048500	Chr1	9174300	9174400				Chr1	25048600	25048700				Chr2	3314900	3315000
Chr1	13932900	13933000	Chr1	10497600	10497700	Chr2	9197000	9197100	Chr1	9174400	9174500				Chr1	25048900	25049000				Chr2	3331500	3331600
Chr1	13938100	13938200	Chr1	10497800	10497900	Chr2	9311400	9311500	Chr1	9175300	9175400				Chr1	25049100	25049200				Chr2	3331600	3331700
Chr1	13938200	13938300	Chr1	10526100	10526200	Chr2	9311500	9311600	Chr1	9175600	9175700				Chr1	25049200	25049300				Chr2	3331700	3331800
Chr1	13938300	13938400	Chr1	10526200	10526300	Chr2	9456000	9456100	Chr1	9201600	9201700				Chr1	25278900	25279000				Chr2	3331800	3331900
Chr1	13940900	13941000	Chr1	10526300	10526400	Chr2	9560800	9560900	Chr1	9205200	9205300				Chr1	25279000	25279100				Chr2	3331900	3332000
Chr1	13941500	13941600	Chr1	10527100	10527200	Chr2	9633500	9633600	Chr1	9236000	9236100				Chr1	25279100	25279200				Chr2	3332000	3332100
Chr1	13942800	13942900	Chr1	10528600	10528700	Chr2	9655500	9655600	Chr1	9304800	9304900				Chr1	25279200	25279300				Chr2	3338500	3338600
Chr1	13942900	13943000	Chr1	10534700	10534800	Chr2	9656000	9656100	Chr1	9304900	9305000				Chr1	25279300	25279400				Chr2	3346800	3346900
Chr1	13946700	13946800	Chr1	10534800	10534900	Chr2	9860000	9860100	Chr1	9305000	9305100				Chr1	25480200	25480300				Chr2	3347000	3347100
Chr1	13946800	13946900	Chr1	10568700	10568800	Chr2	9860100	9860200	Chr1	9305100	9305200				Chr1	25713100	25713200				Chr2	3362300	3362400
Chr1	13946900	13947000	Chr1	10579900	10580000	Chr2	10018100	10018200	Chr1	9305600	9305700				Chr1	25829600	25829700				Chr2	3362500	3362600
Chr1	13972600	13972700	Chr1	10580000	10580100	Chr2	10018600	10018700	Chr1	9373600	9373700				Chr1	25829700	25829800				Chr2	3362600	3362700
Chr1	13979500	13979600	Chr1	10591500	10591600	Chr2	10089900	10090000	Chr1	9384200	9384300				Chr1	25886500	25886600				Chr2	3362900	3363000
Chr1	14030800	14030900	Chr1	10652700	10652800	Chr2	10351600	10351700	Chr1	9384300	9384400				Chr1	25886600	25886700				Chr2	3363000	3363100
Chr1	14032800	14032900	Chr1	10660200	10660300	Chr2	10437000	10437100	Chr1	9384900	9385000				Chr1	25926900	25927000				Chr2	3363100	3363200
Chr1	14032900	14033000	Chr1	10660300	10660400	Chr2	10437200	10437300	Chr1	9412400	9412500				Chr1	25927000	25927100				Chr2	3363400	3363500
Chr1	14033000	14033100	Chr1	10660400	10660500	Chr2	10470300	10470400	Chr1	9550700	9550800				Chr1	25927100	25927200				Chr2	3363500	3363600
Chr1	14033100	14033200	Chr1	10660500	10660600	Chr2	10676500	10676600	Chr1	9572400	9572500				Chr1	25928100	25928200				Chr2	3363600	3363700
Chr1	14059500	14059600	Chr1	10775800	10775900	Chr2	10682800	10682900	Chr1	9572500	9572600				Chr1	25928200	25928300				Chr2	3368600	3368700
Chr1	14059900	14060000	Chr1	10777200	10777300	Chr2	11159700	11159800	Chr1	9574400	9574500				Chr1	25932000	25932100				Chr2	3369300	3369400
Chr1	14060200	14060300	Chr1	10777300	10777400	Chr2	11285800	11285900	Chr1	9587300	9587400				Chr1	25932100	25932200				Chr2	3369400	3369500
Chr1	14060300	14060400	Chr1	10802400	10802500	Chr2	11556200	11556300	Chr1	9626900	9627000				Chr1	25941100	25941200				Chr2	3377800	3377900
Chr1	14082700	14082800	Chr1	10802500	10802600	Chr2	11721600	11721700	Chr1	9676700	9676800				Chr1	25989700	25989800				Chr2	3385600	3385700
Chr1	14082800	14082900	Chr1	10802600	10802700	Chr2	11721800	11721900	Chr1	9676800	9676900				Chr1	25989800	25989900				Chr2	3386400	3386500
Chr1	14082900	14083000	Chr1	10802700	10802800	Chr2	11721900	11722000	Chr1	9676900	9677000				Chr1	25996500	25996600				Chr2	3390700	3390800
Chr1	14083000	14083100	Chr1	10802800	10802900	Chr2	11722000	11722100	Chr1	9677100	9677200				Chr1	26049400	26049500				Chr2	3394300	3394400
Chr1	14083100	14083200	Chr1	10802900	10803000	Chr2	11739900	11740000	Chr1	9677200	9677300				Chr1	26049500	26049600				Chr2	3399500	3399600
Chr1	14083500	14083600	Chr1	10803100	10803200	Chr2	11740000	11740100	Chr1	9677300	9677400				Chr1	26358000	26358100				Chr2	3400100	3400200
Chr1	14083600	14083700	Chr1	10803200	10803300	Chr2	11908900	11909000	Chr1	9678700	9678800				Chr1	26382100	26382200				Chr2	3411000	3411100
Chr1	14084100	14084200	Chr1	10803300	10803400	Chr2	11983300	11983400	Chr1	9681000	9681100				Chr1	26382200	26382300				Chr2	3411100	3411200
Chr1	14084500	14084600	Chr1	10814400	10814500	Chr2	11983400	11983500	Chr1	9685600	9685700				Chr1	26429700	26429800				Chr2	3414800	3414900
Chr1	14084700	14084800	Chr1	10915100	10915200	Chr2	11983500	11983600	Chr1	9685800	9685900				Chr1	26429800	26429900				Chr2	3426100	3426200
Chr1	14090400	14090500	Chr1	10915200	10915300	Chr2	11983600	11983700	Chr1	9685900	9686000				Chr1	26608100	26608200				Chr2	3427200	3427300
Chr1	14090500	14090600	Chr1	10915900	10916000	Chr2	11983700	11983800	Chr1	9686300	9686400				Chr1	26608200	26608300				Chr2	3437500	3437600
Chr1	14090600	14090700	Chr1	10932000	10932100	Chr2	12093100	12093200	Chr1	9687000	9687100				Chr1	26638000	26638100				Chr2	3437600	3437700
Chr1	14091800	14091900	Chr1	11020400	11020500	Chr2	12578300	12578400	Chr1	9687100	9687200				Chr1	26638100	26638200				Chr2	3437700	3437800
Chr1	14092400	14092500	Chr1	11020500	11020600	Chr2	12739700	12739800	Chr1	9687500	9687600				Chr1	26772800	26772900				Chr2	3441800	3441900
Chr1	14092500	14092600	Chr1	11020600	11020700	Chr2	12739800	12739900	Chr1	9690700	9690800				Chr1	26772900	26773000				Chr2	3444400	3444500
Chr1	14092600	14092700	Chr1	11051200	11051300	Chr2	12740000	12740100	Chr1	9691000	9691100				Chr1	26773600	26773700				Chr2	3448300	3448400
Chr1	14092700	14092800	Chr1	11051300	11051400	Chr2	13102200	13102300	Chr1	9691100	9691200				Chr1	26773700	26773800				Chr2	3448500	3448600
Chr1	14092800	14092900	Chr1	11051400	11051500	Chr2	13268200	13268300	Chr1	9691200	9691300				Chr1	26891600	26891700				Chr2	3449900	3450000
Chr1	14093200	14093300	Chr1	11083100	11083200	Chr2	13271800	13271900	Chr1	9706700	9706800				Chr1	26973300	26973400				Chr2	3450700	3450800
Chr1	14093300	14093400	Chr1	11102300	11102400	Chr2	13886300	13886400	Chr1	9707900	9708000				Chr1	26973400	26973500				Chr2	3451300	3451400
Chr1	14093800	14093900	Chr1	11117500	11117600	Chr2	13907400	13907500	Chr1	9708100	9708200				Chr1	27348600	27348700				Chr2	3452000	3452100
Chr1	14098700	14098800	Chr1	11127500	11127600	Chr2	14351400	14351500	Chr1	9754800	9754900				Chr1	27348700	27348800				Chr2	3452900	3453000
Chr1	14099200	14099300	Chr1	11129000	11129100	Chr2	14353700	14353800	Chr1	9755100	9755200				Chr1	27393300	27393400				Chr2	3453000	3453100
Chr1	14099700	14099800	Chr1	11129200	11129300	Chr2	14355100	14355200	Chr1	9755400	9755500				Chr1	27393400	27393500				Chr2	3467200	3467300
Chr1	14099800	14099900	Chr1	11131600	11131700	Chr2	14355200	14355300	Chr1	9756400	9756500				Chr1	27688100	27688200				Chr2	3467300	3467400
Chr1	14107000	14107100	Chr1	11132700	11132800	Chr2	14445000	14445100	Chr1	9778400	9778500				Chr1	27713200	27713300				Chr2	3468100	3468200
Chr1	14121800	14121900	Chr1	11139700	11139800	Chr2	14522700	14522800	Chr1	9811900	9812000				Chr1	27713300	27713400				Chr2	3468200	3468300
Chr1	14127600	14127700	Chr1	11139800	11139900	Chr2	14523300	14523400	Chr1	9812200	9812300				Chr1	27788900	27789000				Chr2	3468300	3468400
Chr1	14178200	14178300	Chr1	11140000	11140100	Chr2	14523400	14523500	Chr1	9812300	9812400				Chr1	27789000	27789100				Chr2	3468400	3468500
Chr1	14178300	14178400	Chr1	11140100	11140200	Chr2	14841000	14841100	Chr1	9816200	9816300				Chr1	27819100	27819200				Chr2	3468500	3468600
Chr1	14179200	14179300	Chr1	11148200	11148300	Chr2	14952700	14952800	Chr1	9816500	9816600				Chr1	27863500	27863600				Chr2	3468600	3468700
Chr1	14179500	14179600	Chr1	11204400	11204500	Chr2	15611800	15611900	Chr1	9817100	9817200				Chr1	27863700	27863800				Chr2	3468700	3468800
Chr1	14180100	14180200	Chr1	11204500	11204600	Chr2	15611900	15612000	Chr1	9817200	9817300				Chr1	27863800	27863900				Chr2	3472100	3472200
Chr1	14181300	14181400	Chr1	11204600	11204700	Chr2	16061900	16062000	Chr1	9817400	9817500				Chr1	27863900	27864000				Chr2	3489400	3489500
Chr1	14181400	14181500	Chr1	11228600	11228700	Chr2	16537500	16537600	Chr1	9817500	9817600				Chr1	27864800	27864900				Chr2	3489500	3489600
Chr1	14181500	14181600	Chr1	11241600	11241700	Chr2	16537600	16537700	Chr1	9817600	9817700				Chr1	27864900	27865000				Chr2	3489600	3489700
Chr1	14181600	14181700	Chr1	11241700	11241800	Chr2	16537700	16537800	Chr1	9818000	9818100				Chr1	27865200	27865300				Chr2	3492600	3492700
Chr1	14181700	14181800	Chr1	11241800	11241900	Chr2	16537800	16537900	Chr1	9837200	9837300				Chr1	27984500	27984600				Chr2	3494300	3494400
Chr1	14182100	14182200	Chr1	11242000	11242100	Chr2	16539700	16539800	Chr1	9852800	9852900				Chr1	27984600	27984700				Chr2	3495000	3495100
Chr1	14182800	14182900	Chr1	11279900	11280000	Chr2	16539800	16539900	Chr1	9852900	9853000				Chr1	27984700	27984800				Chr2	3495400	3495500
Chr1	14182900	14183000	Chr1	11280000	11280100	Chr2	16539900	16540000	Chr1	9862600	9862700				Chr1	27984800	27984900				Chr2	3495500	3495600
Chr1	14192500	14192600	Chr1	11286900	11287000	Chr2	16596300	16596400	Chr1	9862700	9862800				Chr1	27984900	27985000				Chr2	3495600	3495700
Chr1	14215300	14215400	Chr1	11287600	11287700	Chr2	16876100	16876200	Chr1	9865500	9865600				Chr1	28020300	28020400				Chr2	3495900	3496000
Chr1	14215900	14216000	Chr1	11298500	11298600	Chr2	17029800	17029900	Chr1	9866100	9866200				Chr1	28020400	28020500				Chr2	3496300	3496400
Chr1	14224500	14224600	Chr1	11301400	11301500	Chr2	17224500	17224600	Chr1	9866400	9866500				Chr1	28028000	28028100				Chr2	3496400	3496500
Chr1	14224600	14224700	Chr1	11315100	11315200	Chr2	17224600	17224700	Chr1	9866500	9866600				Chr1	28126900	28127000				Chr2	3496500	3496600
Chr1	14225100	14225200	Chr1	11315200	11315300	Chr2	17224700	17224800	Chr1	9866600	9866700				Chr1	28184500	28184600				Chr2	3502800	3502900
Chr1	14225200	14225300	Chr1	11351500	11351600	Chr2	17224800	17224900	Chr1	9867000	9867100				Chr1	28184600	28184700				Chr2	3503400	3503500
Chr1	14227000	14227100	Chr1	11352300	11352400	Chr2	17307700	17307800	Chr1	9879700	9879800				Chr1	28212300	28212400				Chr2	3503500	3503600
Chr1	14228100	14228200	Chr1	11408600	11408700	Chr2	17418200	17418300	Chr1	9879800	9879900				Chr1	28212400	28212500				Chr2	3503600	3503700
Chr1	14228800	14228900	Chr1	11409700	11409800	Chr2	18093200	18093300	Chr1	9915300	9915400				Chr1	28212500	28212600				Chr2	3562700	3562800
Chr1	14229000	14229100	Chr1	11409800	11409900	Chr2	18106800	18106900	Chr1	9915400	9915500				Chr1	28212600	28212700				Chr2	3740900	3741000
Chr1	14229100	14229200	Chr1	11410100	11410200	Chr2	18106900	18107000	Chr1	9915500	9915600				Chr1	28212700	28212800				Chr2	4142300	4142400
Chr1	14229200	14229300	Chr1	11421200	11421300	Chr2	18165900	18166000	Chr1	9916200	9916300				Chr1	28373400	28373500				Chr2	4222200	4222300
Chr1	14243300	14243400	Chr1	11428300	11428400	Chr2	18497500	18497600	Chr1	9916300	9916400				Chr1	28373500	28373600				Chr2	4310700	4310800
Chr1	14243700	14243800	Chr1	11440900	11441000	Chr2	18994800	18994900	Chr1	9918500	9918600				Chr1	28407900	28408000				Chr2	4311700	4311800
Chr1	14244000	14244100	Chr1	11441000	11441100	Chr2	19172200	19172300	Chr1	9919200	9919300				Chr1	28408000	28408100				Chr2	5539700	5539800
Chr1	14244300	14244400	Chr1	11441100	11441200	Chr2	19176100	19176200	Chr1	9925900	9926000				Chr1	28440800	28440900				Chr2	5539800	5539900
Chr1	14244600	14244700	Chr1	11479200	11479300	Chr2	19176200	19176300	Chr1	9926000	9926100				Chr1	28440900	28441000				Chr2	5540800	5540900
Chr1	14244700	14244800	Chr1	11479400	11479500	Chr2	19319900	19320000	Chr1	9939400	9939500				Chr1	28519900	28520000				Chr2	5540900	5541000
Chr1	14247000	14247100	Chr1	11493400	11493500	Chr2	19415100	19415200	Chr1	10013300	10013400				Chr1	28520000	28520100				Chr2	5885400	5885500
Chr1	14247200	14247300	Chr1	11522300	11522400	Chr3	452100	452200	Chr1	10021500	10021600				Chr1	28527700	28527800				Chr2	5885600	5885700
Chr1	14248100	14248200	Chr1	11585800	11585900	Chr3	1166700	1166800	Chr1	10021800	10021900				Chr1	28527800	28527900				Chr2	5885700	5885800
Chr1	14249200	14249300	Chr1	11585900	11586000	Chr3	1657700	1657800	Chr1	10021900	10022000				Chr1	28544400	28544500				Chr2	6415200	6415300
Chr1	14249500	14249600	Chr1	11586000	11586100	Chr3	1657800	1657900	Chr1	10152800	10152900				Chr1	28544500	28544600				Chr2	6777700	6777800
Chr1	14252800	14252900	Chr1	11586200	11586300	Chr3	1681800	1681900	Chr1	10152900	10153000				Chr1	28544700	28544800				Chr2	6921300	6921400
Chr1	14252900	14253000	Chr1	11618400	11618500	Chr3	1924100	1924200	Chr1	10153200	10153300				Chr1	28544800	28544900				Chr2	6946700	6946800
Chr1	14253000	14253100	Chr1	11618500	11618600	Chr3	1963700	1963800	Chr1	10156600	10156700				Chr1	28568800	28568900				Chr2	6946800	6946900
Chr1	14253300	14253400	Chr1	11618600	11618700	Chr3	1963800	1963900	Chr1	10156700	10156800				Chr1	28634600	28634700				Chr2	6947400	6947500
Chr1	14253400	14253500	Chr1	11618700	11618800	Chr3	1963900	1964000	Chr1	10315300	10315400				Chr1	28634700	28634800				Chr2	7039100	7039200
Chr1	14253600	14253700	Chr1	11619100	11619200	Chr3	1964000	1964100	Chr1	10315400	10315500				Chr1	28724000	28724100				Chr2	7191000	7191100
Chr1	14253700	14253800	Chr1	11619200	11619300	Chr3	1964100	1964200	Chr1	10330000	10330100				Chr1	28867400	28867500				Chr2	7191100	7191200
Chr1	14253800	14253900	Chr1	11619300	11619400	Chr3	1964200	1964300	Chr1	10330100	10330200				Chr1	28889300	28889400				Chr2	7191200	7191300
Chr1	14254100	14254200	Chr1	11619400	11619500	Chr3	1964300	1964400	Chr1	10347100	10347200				Chr1	28889400	28889500				Chr2	7191300	7191400
Chr1	14254200	14254300	Chr1	11619500	11619600	Chr3	1964400	1964500	Chr1	10347400	10347500				Chr1	28889500	28889600				Chr2	7201200	7201300
Chr1	14254300	14254400	Chr1	11619600	11619700	Chr3	1964500	1964600	Chr1	10347900	10348000				Chr1	28889800	28889900				Chr2	7524400	7524500
Chr1	14254400	14254500	Chr1	11649200	11649300	Chr3	1964600	1964700	Chr1	10348100	10348200				Chr1	28890200	28890300				Chr2	7524500	7524600
Chr1	14257000	14257100	Chr1	11649300	11649400	Chr3	1964700	1964800	Chr1	10348300	10348400				Chr1	28947500	28947600				Chr2	7856800	7856900
Chr1	14257100	14257200	Chr1	11661100	11661200	Chr3	1964800	1964900	Chr1	10348400	10348500				Chr1	28947600	28947700				Chr2	7898600	7898700
Chr1	14257200	14257300	Chr1	11661200	11661300	Chr3	1964900	1965000	Chr1	10349200	10349300				Chr1	29002200	29002300				Chr2	8157700	8157800
Chr1	14258900	14259000	Chr1	11661400	11661500	Chr3	1965000	1965100	Chr1	10357300	10357400				Chr1	29016500	29016600				Chr2	8542100	8542200
Chr1	14259000	14259100	Chr1	11662200	11662300	Chr3	1965100	1965200	Chr1	10357400	10357500				Chr1	29016600	29016700				Chr2	8802100	8802200
Chr1	14259800	14259900	Chr1	11669400	11669500	Chr3	1965200	1965300	Chr1	10421400	10421500				Chr1	29016700	29016800				Chr2	8802200	8802300
Chr1	14259900	14260000	Chr1	11669500	11669600	Chr3	1965300	1965400	Chr1	10421500	10421600				Chr1	29143000	29143100				Chr2	8931500	8931600
Chr1	14260200	14260300	Chr1	11686900	11687000	Chr3	1965400	1965500	Chr1	10444000	10444100				Chr1	29143100	29143200				Chr2	8931700	8931800
Chr1	14260300	14260400	Chr1	11687000	11687100	Chr3	1965500	1965600	Chr1	10497600	10497700				Chr1	29342800	29342900				Chr2	8931800	8931900
Chr1	14260400	14260500	Chr1	11700200	11700300	Chr3	1965600	1965700	Chr1	10497700	10497800				Chr1	29342900	29343000				Chr2	9137300	9137400
Chr1	14261000	14261100	Chr1	11700300	11700400	Chr3	1965700	1965800	Chr1	10506600	10506700				Chr1	29422400	29422500				Chr2	9137400	9137500
Chr1	14261800	14261900	Chr1	11700400	11700500	Chr3	1965800	1965900	Chr1	10507100	10507200				Chr1	29422500	29422600				Chr2	9234100	9234200
Chr1	14264000	14264100	Chr1	11700500	11700600	Chr3	1965900	1966000	Chr1	10507200	10507300				Chr1	29427900	29428000				Chr2	9234200	9234300
Chr1	14264500	14264600	Chr1	11701400	11701500	Chr3	1966100	1966200	Chr1	10512800	10512900				Chr1	29428000	29428100				Chr2	9265300	9265400
Chr1	14264600	14264700	Chr1	11704100	11704200	Chr3	1966200	1966300	Chr1	10526100	10526200				Chr1	29428100	29428200				Chr2	9265400	9265500
Chr1	14273400	14273500	Chr1	11706900	11707000	Chr3	1966300	1966400	Chr1	10526200	10526300				Chr1	29443900	29444000				Chr2	9265700	9265800
Chr1	14273500	14273600	Chr1	11707000	11707100	Chr3	1966400	1966500	Chr1	10526600	10526700				Chr1	29472600	29472700				Chr2	9265800	9265900
Chr1	14273600	14273700	Chr1	11708500	11708600	Chr3	1966500	1966600	Chr1	10527000	10527100				Chr1	29472700	29472800				Chr2	9266200	9266300
Chr1	14297600	14297700	Chr1	11708600	11708700	Chr3	1966600	1966700	Chr1	10527100	10527200				Chr1	29525100	29525200				Chr2	9266300	9266400
Chr1	14315900	14316000	Chr1	11720500	11720600	Chr3	1966700	1966800	Chr1	10527600	10527700				Chr1	29525200	29525300				Chr2	9266800	9266900
Chr1	14316500	14316600	Chr1	11733300	11733400	Chr3	1966800	1966900	Chr1	10527700	10527800				Chr1	29526800	29526900				Chr2	9270600	9270700
Chr1	14316600	14316700	Chr1	11734600	11734700	Chr3	1966900	1967000	Chr1	10534600	10534700				Chr1	29526900	29527000				Chr2	9270700	9270800
Chr1	14317300	14317400	Chr1	11736100	11736200	Chr3	1967200	1967300	Chr1	10534700	10534800				Chr1	29527000	29527100				Chr2	9393600	9393700
Chr1	14317600	14317700	Chr1	11736500	11736600	Chr3	1967300	1967400	Chr1	10534800	10534900				Chr1	29694100	29694200				Chr2	9393700	9393800
Chr1	14320300	14320400	Chr1	11736800	11736900	Chr3	1967400	1967500	Chr1	10554500	10554600				Chr1	29694200	29694300				Chr2	9465500	9465600
Chr1	14320400	14320500	Chr1	11740600	11740700	Chr3	1967500	1967600	Chr1	10568500	10568600				Chr1	29696800	29696900				Chr2	9591000	9591100
Chr1	14320500	14320600	Chr1	11740700	11740800	Chr3	1967600	1967700	Chr1	10579900	10580000				Chr1	29736000	29736100				Chr2	9803200	9803300
Chr1	14320600	14320700	Chr1	11740800	11740900	Chr3	1967700	1967800	Chr1	10580000	10580100				Chr1	29804000	29804100				Chr2	9986500	9986600
Chr1	14320700	14320800	Chr1	11752500	11752600	Chr3	1967800	1967900	Chr1	10591500	10591600				Chr1	29804100	29804200				Chr2	10027000	10027100
Chr1	14336100	14336200	Chr1	11789500	11789600	Chr3	1967900	1968000	Chr1	10591900	10592000				Chr1	29833100	29833200				Chr2	10059400	10059500
Chr1	14336200	14336300	Chr1	11793900	11794000	Chr3	1968000	1968100	Chr1	10592000	10592100				Chr1	29833700	29833800				Chr2	10059500	10059600
Chr1	14336300	14336400	Chr1	11817700	11817800	Chr3	1968100	1968200	Chr1	10592100	10592200				Chr1	29911200	29911300				Chr2	10470300	10470400
Chr1	14336400	14336500	Chr1	11836800	11836900	Chr3	1968200	1968300	Chr1	10598100	10598200				Chr1	29911300	29911400				Chr2	10676500	10676600
Chr1	14336500	14336600	Chr1	11861700	11861800	Chr3	1968300	1968400	Chr1	10654400	10654500				Chr1	29911500	29911600				Chr2	10718100	10718200
Chr1	14336600	14336700	Chr1	11880200	11880300	Chr3	1968400	1968500	Chr1	10654500	10654600				Chr1	29911600	29911700				Chr2	11115600	11115700
Chr1	14336700	14336800	Chr1	11887300	11887400	Chr3	1968500	1968600	Chr1	10802400	10802500				Chr1	29911700	29911800				Chr2	11115700	11115800
Chr1	14336800	14336900	Chr1	11887400	11887500	Chr3	1968600	1968700	Chr1	10802500	10802600				Chr1	29911800	29911900				Chr2	11270400	11270500
Chr1	14337000	14337100	Chr1	11888000	11888100	Chr3	1968700	1968800	Chr1	10802600	10802700				Chr1	29923500	29923600				Chr2	11716900	11717000
Chr1	14337100	14337200	Chr1	11895700	11895800	Chr3	1968800	1968900	Chr1	10802700	10802800				Chr1	30081100	30081200				Chr2	11721600	11721700
Chr1	14337200	14337300	Chr1	11895900	11896000	Chr3	1968900	1969000	Chr1	10802800	10802900				Chr1	30081200	30081300				Chr2	11721700	11721800
Chr1	14337300	14337400	Chr1	11896000	11896100	Chr3	1969000	1969100	Chr1	10802900	10803000				Chr1	30084000	30084100				Chr2	11721800	11721900
Chr1	14337500	14337600	Chr1	11897400	11897500	Chr3	1969100	1969200	Chr1	10803000	10803100				Chr1	30173900	30174000				Chr2	11721900	11722000
Chr1	14337600	14337700	Chr1	11899600	11899700	Chr3	1969200	1969300	Chr1	10803100	10803200				Chr1	30174000	30174100				Chr2	11722000	11722100
Chr1	14337700	14337800	Chr1	11900800	11900900	Chr3	1969300	1969400	Chr1	10803200	10803300				Chr1	30237700	30237800				Chr2	11774800	11774900
Chr1	14337800	14337900	Chr1	11901100	11901200	Chr3	1969400	1969500	Chr1	10803300	10803400				Chr1	30237800	30237900				Chr2	11774900	11775000
Chr1	14337900	14338000	Chr1	11901200	11901300	Chr3	1969500	1969600	Chr1	10814300	10814400				Chr2	2700	2800				Chr2	11864200	11864300
Chr1	14338000	14338100	Chr1	11901300	11901400	Chr3	1969600	1969700	Chr1	10814400	10814500				Chr2	3000	3100				Chr2	12329000	12329100
Chr1	14339800	14339900	Chr1	11901400	11901500	Chr3	1969700	1969800	Chr1	10853100	10853200				Chr2	3100	3200				Chr2	12333000	12333100
Chr1	14340100	14340200	Chr1	11901500	11901600	Chr3	1969800	1969900	Chr1	10867700	10867800				Chr2	3200	3300				Chr2	12471800	12471900
Chr1	14340300	14340400	Chr1	11960800	11960900	Chr3	1969900	1970000	Chr1	10922400	10922500				Chr2	3300	3400				Chr2	12881500	12881600
Chr1	14340900	14341000	Chr1	11960900	11961000	Chr3	1970000	1970100	Chr1	10923700	10923800				Chr2	3400	3500				Chr2	12881600	12881700
Chr1	14341000	14341100	Chr1	11982700	11982800	Chr3	1970100	1970200	Chr1	10924800	10924900				Chr2	3500	3600				Chr2	12882700	12882800
Chr1	14342100	14342200	Chr1	11982800	11982900	Chr3	1970200	1970300	Chr1	10924900	10925000				Chr2	3600	3700				Chr2	12975900	12976000
Chr1	14342200	14342300	Chr1	11983000	11983100	Chr3	1970300	1970400	Chr1	10931000	10931100				Chr2	3700	3800				Chr2	12976000	12976100
Chr1	14346000	14346100	Chr1	11984300	11984400	Chr3	2105000	2105100	Chr1	10931200	10931300				Chr2	3800	3900				Chr2	13019300	13019400
Chr1	14346800	14346900	Chr1	11984400	11984500	Chr3	2260800	2260900	Chr1	10932200	10932300				Chr2	3900	4000				Chr2	13019400	13019500
Chr1	14349000	14349100	Chr1	11988100	11988200	Chr3	2840700	2840800	Chr1	10932300	10932400				Chr2	4000	4100				Chr2	13020000	13020100
Chr1	14356100	14356200	Chr1	12010000	12010100	Chr3	2841500	2841600	Chr1	11006000	11006100				Chr2	4100	4200				Chr2	13137200	13137300
Chr1	14364600	14364700	Chr1	12010100	12010200	Chr3	2944600	2944700	Chr1	11006100	11006200				Chr2	4200	4300				Chr2	13137300	13137400
Chr1	14364700	14364800	Chr1	12022400	12022500	Chr3	3366300	3366400	Chr1	11006600	11006700				Chr2	4300	4400				Chr2	13139700	13139800
Chr1	14365200	14365300	Chr1	12022500	12022600	Chr3	3837700	3837800	Chr1	11019500	11019600				Chr2	4400	4500				Chr2	13139800	13139900
Chr1	14374300	14374400	Chr1	12036400	12036500	Chr3	3837800	3837900	Chr1	11027700	11027800				Chr2	4500	4600				Chr2	13271800	13271900
Chr1	14380100	14380200	Chr1	12037700	12037800	Chr3	4561100	4561200	Chr1	11048900	11049000				Chr2	4600	4700				Chr2	13271900	13272000
Chr1	14380200	14380300	Chr1	12041100	12041200	Chr3	4635300	4635400	Chr1	11049000	11049100				Chr2	4700	4800				Chr2	13272000	13272100
Chr1	14383600	14383700	Chr1	12041200	12041300	Chr3	4951600	4951700	Chr1	11049200	11049300				Chr2	4800	4900				Chr2	13272100	13272200
Chr1	14383700	14383800	Chr1	12070700	12070800	Chr3	5380100	5380200	Chr1	11051200	11051300				Chr2	4900	5000				Chr2	14309700	14309800
Chr1	14384200	14384300	Chr1	12078100	12078200	Chr3	5593600	5593700	Chr1	11051300	11051400				Chr2	5000	5100				Chr2	14310200	14310300
Chr1	14384300	14384400	Chr1	12080700	12080800	Chr3	5744600	5744700	Chr1	11083100	11083200				Chr2	5100	5200				Chr2	14350300	14350400
Chr1	14385400	14385500	Chr1	12083800	12083900	Chr3	5792500	5792600	Chr1	11102300	11102400				Chr2	5200	5300				Chr2	14350400	14350500
Chr1	14385500	14385600	Chr1	12083900	12084000	Chr3	5862000	5862100	Chr1	11102900	11103000				Chr2	5300	5400				Chr2	14351300	14351400
Chr1	14391400	14391500	Chr1	12084000	12084100	Chr3	5862100	5862200	Chr1	11103900	11104000				Chr2	5400	5500				Chr2	14351400	14351500
Chr1	14392500	14392600	Chr1	12084200	12084300	Chr3	5862200	5862300	Chr1	11111100	11111200				Chr2	5500	5600				Chr2	14352100	14352200
Chr1	14394600	14394700	Chr1	12133200	12133300	Chr3	5862300	5862400	Chr1	11111200	11111300				Chr2	5600	5700				Chr2	14352200	14352300
Chr1	14401300	14401400	Chr1	12137600	12137700	Chr3	5929500	5929600	Chr1	11117500	11117600				Chr2	5700	5800				Chr2	14353100	14353200
Chr1	14401800	14401900	Chr1	12138900	12139000	Chr3	5930600	5930700	Chr1	11117600	11117700				Chr2	5800	5900				Chr2	14353600	14353700
Chr1	14410200	14410300	Chr1	12139000	12139100	Chr3	6244500	6244600	Chr1	11127300	11127400				Chr2	5900	6000				Chr2	14353700	14353800
Chr1	14410300	14410400	Chr1	12143000	12143100	Chr3	6244600	6244700	Chr1	11129000	11129100				Chr2	6000	6100				Chr2	14354100	14354200
Chr1	14410400	14410500	Chr1	12143100	12143200	Chr3	6487100	6487200	Chr1	11129100	11129200				Chr2	6100	6200				Chr2	14355100	14355200
Chr1	14410800	14410900	Chr1	12176100	12176200	Chr3	6729000	6729100	Chr1	11129200	11129300				Chr2	6200	6300				Chr2	14355200	14355300
Chr1	14419900	14420000	Chr1	12187000	12187100	Chr3	7714200	7714300	Chr1	11132700	11132800				Chr2	6300	6400				Chr2	14356000	14356100
Chr1	14425800	14425900	Chr1	12247600	12247700	Chr3	7765700	7765800	Chr1	11148200	11148300				Chr2	6400	6500				Chr2	14356500	14356600
Chr1	14429300	14429400	Chr1	12247700	12247800	Chr3	7766400	7766500	Chr1	11150800	11150900				Chr2	6500	6600				Chr2	14445000	14445100
Chr1	14430000	14430100	Chr1	12263200	12263300	Chr3	7766700	7766800	Chr1	11152700	11152800				Chr2	6600	6700				Chr2	14522600	14522700
Chr1	14430200	14430300	Chr1	12263300	12263400	Chr3	7852800	7852900	Chr1	11174200	11174300				Chr2	6700	6800				Chr2	14522700	14522800
Chr1	14433000	14433100	Chr1	12263400	12263500	Chr3	7852900	7853000	Chr1	11204400	11204500				Chr2	6800	6900				Chr2	14522800	14522900
Chr1	14433600	14433700	Chr1	12263600	12263700	Chr3	7861900	7862000	Chr1	11204500	11204600				Chr2	6900	7000				Chr2	14522900	14523000
Chr1	14433700	14433800	Chr1	12286700	12286800	Chr3	7862000	7862100	Chr1	11212400	11212500				Chr2	7000	7100				Chr2	14523000	14523100
Chr1	14434800	14434900	Chr1	12286800	12286900	Chr3	7921700	7921800	Chr1	11241600	11241700				Chr2	7100	7200				Chr2	14523100	14523200
Chr1	14437500	14437600	Chr1	12287000	12287100	Chr3	7921800	7921900	Chr1	11241700	11241800				Chr2	7200	7300				Chr2	14523200	14523300
Chr1	14437700	14437800	Chr1	12302900	12303000	Chr3	7921900	7922000	Chr1	11241900	11242000				Chr2	7300	7400				Chr2	14523300	14523400
Chr1	14437800	14437900	Chr1	12303000	12303100	Chr3	7922100	7922200	Chr1	11242000	11242100				Chr2	7400	7500				Chr2	14523400	14523500
Chr1	14437900	14438000	Chr1	12303100	12303200	Chr3	7922200	7922300	Chr1	11259600	11259700				Chr2	7500	7600				Chr2	14525100	14525200
Chr1	14438000	14438100	Chr1	12328200	12328300	Chr3	7922300	7922400	Chr1	11284400	11284500				Chr2	7600	7700				Chr2	14525200	14525300
Chr1	14438100	14438200	Chr1	12328300	12328400	Chr3	7978700	7978800	Chr1	11286600	11286700				Chr2	7700	7800				Chr2	14525300	14525400
Chr1	14438500	14438600	Chr1	12328700	12328800	Chr3	7980100	7980200	Chr1	11286800	11286900				Chr2	7800	7900				Chr2	14525400	14525500
Chr1	14438600	14438700	Chr1	12329400	12329500	Chr3	7980200	7980300	Chr1	11287000	11287100				Chr2	7900	8000				Chr2	14894300	14894400
Chr1	14438700	14438800	Chr1	12337700	12337800	Chr3	7995600	7995700	Chr1	11287100	11287200				Chr2	8000	8100				Chr2	14894700	14894800
Chr1	14438800	14438900	Chr1	12338700	12338800	Chr3	8003400	8003500	Chr1	11287500	11287600				Chr2	8100	8200				Chr2	14894800	14894900
Chr1	14439100	14439200	Chr1	12338800	12338900	Chr3	8003500	8003600	Chr1	11287600	11287700				Chr2	8200	8300				Chr2	15029700	15029800
Chr1	14439200	14439300	Chr1	12363600	12363700	Chr3	8108000	8108100	Chr1	11298400	11298500				Chr2	8300	8400				Chr2	15029800	15029900
Chr1	14439300	14439400	Chr1	12364800	12364900	Chr3	8108100	8108200	Chr1	11298500	11298600				Chr2	8400	8500				Chr2	15029900	15030000
Chr1	14439500	14439600	Chr1	12365100	12365200	Chr3	8236100	8236200	Chr1	11315100	11315200				Chr2	8500	8600				Chr2	15168800	15168900
Chr1	14440700	14440800	Chr1	12365200	12365300	Chr3	8236200	8236300	Chr1	11315200	11315300				Chr2	8600	8700				Chr2	15169600	15169700
Chr1	14442600	14442700	Chr1	12379200	12379300	Chr3	8329300	8329400	Chr1	11325200	11325300				Chr2	8700	8800				Chr2	15208300	15208400
Chr1	14449900	14450000	Chr1	12379700	12379800	Chr3	8843000	8843100	Chr1	11351500	11351600				Chr2	8800	8900				Chr2	15208400	15208500
Chr1	14450100	14450200	Chr1	12401600	12401700	Chr3	9123700	9123800	Chr1	11351600	11351700				Chr2	8900	9000				Chr2	15320300	15320400
Chr1	14450200	14450300	Chr1	12401800	12401900	Chr3	9417800	9417900	Chr1	11351800	11351900				Chr2	9000	9100				Chr2	15320400	15320500
Chr1	14450400	14450500	Chr1	12424900	12425000	Chr3	9736000	9736100	Chr1	11351900	11352000				Chr2	9100	9200				Chr2	15346200	15346300
Chr1	14450700	14450800	Chr1	12425000	12425100	Chr3	9809000	9809100	Chr1	11352300	11352400				Chr2	9200	9300				Chr2	15470100	15470200
Chr1	14450800	14450900	Chr1	12469100	12469200	Chr3	9839200	9839300	Chr1	11407800	11407900				Chr2	9300	9400				Chr2	15470200	15470300
Chr1	14451100	14451200	Chr1	12470300	12470400	Chr3	10031200	10031300	Chr1	11408000	11408100				Chr2	9400	9500				Chr2	15634700	15634800
Chr1	14451200	14451300	Chr1	12470400	12470500	Chr3	10168800	10168900	Chr1	11408100	11408200				Chr2	9500	9600				Chr2	15722200	15722300
Chr1	14452300	14452400	Chr1	12470600	12470700	Chr3	10318300	10318400	Chr1	11408200	11408300				Chr2	102000	102100				Chr2	15890400	15890500
Chr1	14452400	14452500	Chr1	12470800	12470900	Chr3	10320800	10320900	Chr1	11408300	11408400				Chr2	249100	249200				Chr2	15916800	15916900
Chr1	14453400	14453500	Chr1	12477000	12477100	Chr3	10406100	10406200	Chr1	11408400	11408500				Chr2	403100	403200				Chr2	16475600	16475700
Chr1	14459300	14459400	Chr1	12511100	12511200	Chr3	10406200	10406300	Chr1	11408500	11408600				Chr2	706700	706800				Chr2	16475700	16475800
Chr1	14461500	14461600	Chr1	12511300	12511400	Chr3	10414000	10414100	Chr1	11408600	11408700				Chr2	706800	706900				Chr2	16518600	16518700
Chr1	14466400	14466500	Chr1	12514900	12515000	Chr3	10417000	10417100	Chr1	11409800	11409900				Chr2	771400	771500				Chr2	16518700	16518800
Chr1	14475000	14475100	Chr1	12525100	12525200	Chr3	10510000	10510100	Chr1	11410100	11410200				Chr2	771500	771600				Chr2	16537400	16537500
Chr1	14475100	14475200	Chr1	12525200	12525300	Chr3	10510100	10510200	Chr1	11421200	11421300				Chr2	819200	819300				Chr2	16537500	16537600
Chr1	14475200	14475300	Chr1	12530200	12530300	Chr3	10653400	10653500	Chr1	11428200	11428300				Chr2	819300	819400				Chr2	16537600	16537700
Chr1	14475600	14475700	Chr1	12556100	12556200	Chr3	10666600	10666700	Chr1	11428300	11428400				Chr2	819400	819500				Chr2	16537700	16537800
Chr1	14487600	14487700	Chr1	12556200	12556300	Chr3	10681400	10681500	Chr1	11479200	11479300				Chr2	819500	819600				Chr2	16537800	16537900
Chr1	14487700	14487800	Chr1	12562900	12563000	Chr3	10681500	10681600	Chr1	11493400	11493500				Chr2	819600	819700				Chr2	16539600	16539700
Chr1	14487800	14487900	Chr1	12563300	12563400	Chr3	10752400	10752500	Chr1	11585900	11586000				Chr2	819700	819800				Chr2	16539700	16539800
Chr1	14488600	14488700	Chr1	12564000	12564100	Chr3	10759400	10759500	Chr1	11586000	11586100				Chr2	819800	819900				Chr2	16539800	16539900
Chr1	14489000	14489100	Chr1	12566500	12566600	Chr3	10763000	10763100	Chr1	11610000	11610100				Chr2	819900	820000				Chr2	16539900	16540000
Chr1	14489300	14489400	Chr1	12566600	12566700	Chr3	10763100	10763200	Chr1	11610500	11610600				Chr2	820000	820100				Chr2	16570900	16571000
Chr1	14489600	14489700	Chr1	12566900	12567000	Chr3	10811600	10811700	Chr1	11620600	11620700				Chr2	820100	820200				Chr2	16571000	16571100
Chr1	14489900	14490000	Chr1	12567000	12567100	Chr3	10841600	10841700	Chr1	11632000	11632100				Chr2	820200	820300				Chr2	16571200	16571300
Chr1	14490000	14490100	Chr1	12568200	12568300	Chr3	10841700	10841800	Chr1	11644300	11644400				Chr2	820300	820400				Chr2	16571300	16571400
Chr1	14490200	14490300	Chr1	12571400	12571500	Chr3	11022000	11022100	Chr1	11644500	11644600				Chr2	820400	820500				Chr2	16571400	16571500
Chr1	14490300	14490400	Chr1	12573800	12573900	Chr3	11055700	11055800	Chr1	11648400	11648500				Chr2	820500	820600				Chr2	16571600	16571700
Chr1	14490700	14490800	Chr1	12577800	12577900	Chr3	11060300	11060400	Chr1	11649200	11649300				Chr2	820600	820700				Chr2	16571700	16571800
Chr1	14491300	14491400	Chr1	12577900	12578000	Chr3	11060400	11060500	Chr1	11649300	11649400				Chr2	820700	820800				Chr2	16571800	16571900
Chr1	14491800	14491900	Chr1	12578100	12578200	Chr3	11061900	11062000	Chr1	11661100	11661200				Chr2	820800	820900				Chr2	16572300	16572400
Chr1	14493300	14493400	Chr1	12591400	12591500	Chr3	11062000	11062100	Chr1	11661200	11661300				Chr2	820900	821000				Chr2	16572600	16572700
Chr1	14493500	14493600	Chr1	12593200	12593300	Chr3	11090500	11090600	Chr1	11661400	11661500				Chr2	821000	821100				Chr2	16572700	16572800
Chr1	14494100	14494200	Chr1	12593300	12593400	Chr3	11205300	11205400	Chr1	11662200	11662300				Chr2	821100	821200				Chr2	17029800	17029900
Chr1	14494200	14494300	Chr1	12615000	12615100	Chr3	11436500	11436600	Chr1	11666900	11667000				Chr2	821200	821300				Chr2	17224500	17224600
Chr1	14494300	14494400	Chr1	12619300	12619400	Chr3	11438200	11438300	Chr1	11669400	11669500				Chr2	821300	821400				Chr2	17224600	17224700
Chr1	14494500	14494600	Chr1	12662800	12662900	Chr3	11503200	11503300	Chr1	11669500	11669600				Chr2	821400	821500				Chr2	17224700	17224800
Chr1	14494700	14494800	Chr1	12673200	12673300	Chr3	11537000	11537100	Chr1	11692500	11692600				Chr2	821500	821600				Chr2	17224800	17224900
Chr1	14495000	14495100	Chr1	12684700	12684800	Chr3	11586100	11586200	Chr1	11692600	11692700				Chr2	821600	821700				Chr2	17269700	17269800
Chr1	14495200	14495300	Chr1	12691400	12691500	Chr3	11586200	11586300	Chr1	11692700	11692800				Chr2	821700	821800				Chr2	17269800	17269900
Chr1	14495500	14495600	Chr1	12713400	12713500	Chr3	11588700	11588800	Chr1	11693000	11693100				Chr2	821800	821900				Chr2	17269900	17270000
Chr1	14495700	14495800	Chr1	12713600	12713700	Chr3	11628500	11628600	Chr1	11693100	11693200				Chr2	821900	822000				Chr2	17270200	17270300
Chr1	14495800	14495900	Chr1	12713700	12713800	Chr3	11645000	11645100	Chr1	11700000	11700100				Chr2	822000	822100				Chr2	17270500	17270600
Chr1	14498100	14498200	Chr1	12714400	12714500	Chr3	11645100	11645200	Chr1	11700200	11700300				Chr2	822100	822200				Chr2	17660700	17660800
Chr1	14501000	14501100	Chr1	12714800	12714900	Chr3	11660400	11660500	Chr1	11700400	11700500				Chr2	822200	822300				Chr2	17660800	17660900
Chr1	14501700	14501800	Chr1	12717100	12717200	Chr3	11674900	11675000	Chr1	11700500	11700600				Chr2	822300	822400				Chr2	17923200	17923300
Chr1	14501900	14502000	Chr1	12717700	12717800	Chr3	11675800	11675900	Chr1	11700600	11700700				Chr2	822400	822500				Chr2	17923300	17923400
Chr1	14502100	14502200	Chr1	12722800	12722900	Chr3	11675900	11676000	Chr1	11700900	11701000				Chr2	822500	822600				Chr2	17923400	17923500
Chr1	14502800	14502900	Chr1	12724100	12724200	Chr3	11726300	11726400	Chr1	11701100	11701200				Chr2	822600	822700				Chr2	17945900	17946000
Chr1	14502900	14503000	Chr1	12724200	12724300	Chr3	11862600	11862700	Chr1	11701400	11701500				Chr2	822700	822800				Chr2	18626700	18626800
Chr1	14503000	14503100	Chr1	12724900	12725000	Chr3	11968100	11968200	Chr1	11704100	11704200				Chr2	822800	822900				Chr2	18703700	18703800
Chr1	14504600	14504700	Chr1	12728300	12728400	Chr3	11983800	11983900	Chr1	11704500	11704600				Chr2	822900	823000				Chr2	18956600	18956700
Chr1	14504900	14505000	Chr1	12728400	12728500	Chr3	11983900	11984000	Chr1	11706500	11706600				Chr2	823000	823100				Chr2	18994800	18994900
Chr1	14511300	14511400	Chr1	12728600	12728700	Chr3	12086600	12086700	Chr1	11706800	11706900				Chr2	823100	823200				Chr2	19176100	19176200
Chr1	14544500	14544600	Chr1	12728700	12728800	Chr3	12128600	12128700	Chr1	11706900	11707000				Chr2	823200	823300				Chr2	19176200	19176300
Chr1	14669100	14669200	Chr1	12728800	12728900	Chr3	12129500	12129600	Chr1	11707000	11707100				Chr2	823300	823400				Chr2	19244000	19244100
Chr1	14669200	14669300	Chr1	12729600	12729700	Chr3	12129600	12129700	Chr1	11708200	11708300				Chr2	823400	823500				Chr2	19319800	19319900
Chr1	14806200	14806300	Chr1	12729700	12729800	Chr3	12243000	12243100	Chr1	11708400	11708500				Chr2	823500	823600				Chr2	19319900	19320000
Chr1	14806600	14806700	Chr1	12729800	12729900	Chr3	12247600	12247700	Chr1	11708500	11708600				Chr2	846800	846900				Chr2	19344400	19344500
Chr1	14807800	14807900	Chr1	12730100	12730200	Chr3	12257400	12257500	Chr1	11708700	11708800				Chr2	846900	847000				Chr2	19415100	19415200
Chr1	14807900	14808000	Chr1	12730300	12730400	Chr3	12257500	12257600	Chr1	11720500	11720600				Chr2	849700	849800				Chr3	88300	88400
Chr1	14808000	14808100	Chr1	12730400	12730500	Chr3	12258900	12259000	Chr1	11735900	11736000				Chr2	849800	849900				Chr3	104700	104800
Chr1	14813800	14813900	Chr1	12733800	12733900	Chr3	12259000	12259100	Chr1	11736100	11736200				Chr2	849900	850000				Chr3	195100	195200
Chr1	14815100	14815200	Chr1	12733900	12734000	Chr3	12323000	12323100	Chr1	11736400	11736500				Chr2	852800	852900				Chr3	195200	195300
Chr1	14816000	14816100	Chr1	12741800	12741900	Chr3	12353200	12353300	Chr1	11736500	11736600				Chr2	852900	853000				Chr3	195400	195500
Chr1	14826900	14827000	Chr1	12741900	12742000	Chr3	12479000	12479100	Chr1	11737000	11737100				Chr2	853000	853100				Chr3	196400	196500
Chr1	14827000	14827100	Chr1	12742700	12742800	Chr3	12480500	12480600	Chr1	11737300	11737400				Chr2	1054700	1054800				Chr3	259600	259700
Chr1	14838700	14838800	Chr1	12742800	12742900	Chr3	12480600	12480700	Chr1	11740600	11740700				Chr2	1114000	1114100				Chr3	476800	476900
Chr1	14838800	14838900	Chr1	12742900	12743000	Chr3	12486000	12486100	Chr1	11740700	11740800				Chr2	1123400	1123500				Chr3	511000	511100
Chr1	14838900	14839000	Chr1	12813700	12813800	Chr3	12486100	12486200	Chr1	11752400	11752500				Chr2	1154400	1154500				Chr3	511100	511200
Chr1	14842700	14842800	Chr1	12813800	12813900	Chr3	12586400	12586500	Chr1	11752500	11752600				Chr2	1880700	1880800				Chr3	586000	586100
Chr1	14846900	14847000	Chr1	12816300	12816400	Chr3	12613400	12613500	Chr1	11754700	11754800				Chr2	2034400	2034500				Chr3	586100	586200
Chr1	14875800	14875900	Chr1	12818200	12818300	Chr3	12613500	12613600	Chr1	11789400	11789500				Chr2	2184500	2184600				Chr3	1081800	1081900
Chr1	14880000	14880100	Chr1	12818700	12818800	Chr3	12618500	12618600	Chr1	11789500	11789600				Chr2	2184600	2184700				Chr3	1167600	1167700
Chr1	14883800	14883900	Chr1	12839200	12839300	Chr3	12618600	12618700	Chr1	11793900	11794000				Chr2	2184700	2184800				Chr3	1306600	1306700
Chr1	14883900	14884000	Chr1	12839300	12839400	Chr3	12618700	12618800	Chr1	11794000	11794100				Chr2	2184800	2184900				Chr3	1306700	1306800
Chr1	14899200	14899300	Chr1	12839500	12839600	Chr3	12620000	12620100	Chr1	11804100	11804200				Chr2	2184900	2185000				Chr3	1601300	1601400
Chr1	14900500	14900600	Chr1	12854200	12854300	Chr3	12620100	12620200	Chr1	11805800	11805900				Chr2	2185000	2185100				Chr3	1657700	1657800
Chr1	14906100	14906200	Chr1	12854300	12854400	Chr3	12661300	12661400	Chr1	11806200	11806300				Chr2	2764500	2764600				Chr3	1657800	1657900
Chr1	14906300	14906400	Chr1	12854400	12854500	Chr3	12661400	12661500	Chr1	11806300	11806400				Chr2	2806600	2806700				Chr3	1681800	1681900
Chr1	14906400	14906500	Chr1	12855100	12855200	Chr3	12661800	12661900	Chr1	11807800	11807900				Chr2	2806900	2807000				Chr3	1681900	1682000
Chr1	14907700	14907800	Chr1	12855400	12855500	Chr3	12661900	12662000	Chr1	11817700	11817800				Chr2	2938200	2938300				Chr3	1843300	1843400
Chr1	14908000	14908100	Chr1	12865600	12865700	Chr3	12717400	12717500	Chr1	11834600	11834700				Chr2	2938300	2938400				Chr3	1920000	1920100
Chr1	14908100	14908200	Chr1	12865700	12865800	Chr3	12854500	12854600	Chr1	11834900	11835000				Chr2	2965600	2965700				Chr3	1959400	1959500
Chr1	14924300	14924400	Chr1	12866000	12866100	Chr3	12855900	12856000	Chr1	11835000	11835100				Chr2	3186700	3186800				Chr3	1963700	1963800
Chr1	14924400	14924500	Chr1	12866100	12866200	Chr3	12856000	12856100	Chr1	11835700	11835800				Chr2	3187200	3187300				Chr3	1963800	1963900
Chr1	14925400	14925500	Chr1	12872400	12872500	Chr3	12861600	12861700	Chr1	11836400	11836500				Chr2	3187900	3188000				Chr3	1963900	1964000
Chr1	14926200	14926300	Chr1	12874200	12874300	Chr3	12965800	12965900	Chr1	11836800	11836900				Chr2	3188000	3188100				Chr3	1964000	1964100
Chr1	14926300	14926400	Chr1	12874300	12874400	Chr3	12965900	12966000	Chr1	11859600	11859700				Chr2	3188600	3188700				Chr3	1964100	1964200
Chr1	14926400	14926500	Chr1	12876200	12876300	Chr3	12967500	12967600	Chr1	11861700	11861800				Chr2	3188800	3188900				Chr3	1964200	1964300
Chr1	15007800	15007900	Chr1	12876300	12876400	Chr3	12989900	12990000	Chr1	11871400	11871500				Chr2	3189300	3189400				Chr3	1964300	1964400
Chr1	15007900	15008000	Chr1	12876400	12876500	Chr3	13169000	13169100	Chr1	11879900	11880000				Chr2	3239700	3239800				Chr3	1964400	1964500
Chr1	15040600	15040700	Chr1	12896400	12896500	Chr3	13356400	13356500	Chr1	11887300	11887400				Chr2	3241600	3241700				Chr3	1964500	1964600
Chr1	15040800	15040900	Chr1	12900000	12900100	Chr3	13391200	13391300	Chr1	11887400	11887500				Chr2	3244600	3244700				Chr3	1964600	1964700
Chr1	15041000	15041100	Chr1	12900100	12900200	Chr3	13405100	13405200	Chr1	11889400	11889500				Chr2	3244700	3244800				Chr3	1964700	1964800
Chr1	15041400	15041500	Chr1	12900200	12900300	Chr3	13478000	13478100	Chr1	11891400	11891500				Chr2	3250400	3250500				Chr3	1964800	1964900
Chr1	15041600	15041700	Chr1	12900300	12900400	Chr3	13479700	13479800	Chr1	11891500	11891600				Chr2	3250500	3250600				Chr3	1964900	1965000
Chr1	15042200	15042300	Chr1	12901500	12901600	Chr3	13519300	13519400	Chr1	11892500	11892600				Chr2	3250600	3250700				Chr3	1965000	1965100
Chr1	15042300	15042400	Chr1	12901800	12901900	Chr3	13586900	13587000	Chr1	11892600	11892700				Chr2	3250700	3250800				Chr3	1965100	1965200
Chr1	15042400	15042500	Chr1	12901900	12902000	Chr3	13587300	13587400	Chr1	11892700	11892800				Chr2	3250900	3251000				Chr3	1965200	1965300
Chr1	15042600	15042700	Chr1	12902000	12902100	Chr3	13587500	13587600	Chr1	11893000	11893100				Chr2	3251000	3251100				Chr3	1965300	1965400
Chr1	15042700	15042800	Chr1	12902900	12903000	Chr3	13587600	13587700	Chr1	11893100	11893200				Chr2	3251600	3251700				Chr3	1965400	1965500
Chr1	15042800	15042900	Chr1	12903000	12903100	Chr3	13588800	13588900	Chr1	11895600	11895700				Chr2	3251700	3251800				Chr3	1965500	1965600
Chr1	15043400	15043500	Chr1	12903200	12903300	Chr3	13588900	13589000	Chr1	11895700	11895800				Chr2	3251800	3251900				Chr3	1965600	1965700
Chr1	15044700	15044800	Chr1	12903300	12903400	Chr3	13589000	13589100	Chr1	11895800	11895900				Chr2	3251900	3252000				Chr3	1965700	1965800
Chr1	15044800	15044900	Chr1	12906800	12906900	Chr3	13589200	13589300	Chr1	11895900	11896000				Chr2	3252000	3252100				Chr3	1965800	1965900
Chr1	15050500	15050600	Chr1	12927000	12927100	Chr3	13589300	13589400	Chr1	11896000	11896100				Chr2	3252100	3252200				Chr3	1965900	1966000
Chr1	15050700	15050800	Chr1	12930000	12930100	Chr3	13589400	13589500	Chr1	11897100	11897200				Chr2	3255800	3255900				Chr3	1966000	1966100
Chr1	15051100	15051200	Chr1	12930200	12930300	Chr3	13589900	13590000	Chr1	11897400	11897500				Chr2	3255900	3256000				Chr3	1966100	1966200
Chr1	15051300	15051400	Chr1	12930300	12930400	Chr3	13590000	13590100	Chr1	11898300	11898400				Chr2	3268600	3268700				Chr3	1966200	1966300
Chr1	15051800	15051900	Chr1	12942600	12942700	Chr3	13590100	13590200	Chr1	11899600	11899700				Chr2	3268700	3268800				Chr3	1966300	1966400
Chr1	15052100	15052200	Chr1	12942700	12942800	Chr3	13590200	13590300	Chr1	11900900	11901000				Chr2	3268800	3268900				Chr3	1966400	1966500
Chr1	15052200	15052300	Chr1	12958100	12958200	Chr3	13590300	13590400	Chr1	11901000	11901100				Chr2	3268900	3269000				Chr3	1966500	1966600
Chr1	15052300	15052400	Chr1	12959700	12959800	Chr3	13590400	13590500	Chr1	11901100	11901200				Chr2	3269700	3269800				Chr3	1966600	1966700
Chr1	15052400	15052500	Chr1	12976900	12977000	Chr3	13590500	13590600	Chr1	11901300	11901400				Chr2	3269800	3269900				Chr3	1966700	1966800
Chr1	15052500	15052600	Chr1	12977000	12977100	Chr3	13590600	13590700	Chr1	11901500	11901600				Chr2	3270200	3270300				Chr3	1966800	1966900
Chr1	15060400	15060500	Chr1	12994700	12994800	Chr3	13590700	13590800	Chr1	11901600	11901700				Chr2	3270400	3270500				Chr3	1966900	1967000
Chr1	15061100	15061200	Chr1	13017000	13017100	Chr3	13590900	13591000	Chr1	11930600	11930700				Chr2	3270700	3270800				Chr3	1967100	1967200
Chr1	15061300	15061400	Chr1	13017100	13017200	Chr3	13591100	13591200	Chr1	11930700	11930800				Chr2	3274300	3274400				Chr3	1967200	1967300
Chr1	15063400	15063500	Chr1	13017200	13017300	Chr3	13591200	13591300	Chr1	11935000	11935100				Chr2	3275900	3276000				Chr3	1967300	1967400
Chr1	15063500	15063600	Chr1	13017300	13017400	Chr3	13591300	13591400	Chr1	11935500	11935600				Chr2	3276000	3276100				Chr3	1967400	1967500
Chr1	15063600	15063700	Chr1	13030300	13030400	Chr3	13591400	13591500	Chr1	11935600	11935700				Chr2	3276400	3276500				Chr3	1967500	1967600
Chr1	15063700	15063800	Chr1	13056000	13056100	Chr3	13591500	13591600	Chr1	11958000	11958100				Chr2	3276500	3276600				Chr3	1967600	1967700
Chr1	15063900	15064000	Chr1	13056300	13056400	Chr3	13591600	13591700	Chr1	11958100	11958200				Chr2	3276600	3276700				Chr3	1967700	1967800
Chr1	15064000	15064100	Chr1	13057200	13057300	Chr3	13591700	13591800	Chr1	11960800	11960900				Chr2	3280800	3280900				Chr3	1967800	1967900
Chr1	15064100	15064200	Chr1	13059300	13059400	Chr3	13591900	13592000	Chr1	11981000	11981100				Chr2	3280900	3281000				Chr3	1967900	1968000
Chr1	15064300	15064400	Chr1	13059500	13059600	Chr3	13592000	13592100	Chr1	11982700	11982800				Chr2	3289000	3289100				Chr3	1968000	1968100
Chr1	15064600	15064700	Chr1	13059600	13059700	Chr3	13592100	13592200	Chr1	12009900	12010000				Chr2	3290900	3291000				Chr3	1968100	1968200
Chr1	15065100	15065200	Chr1	13059700	13059800	Chr3	13592200	13592300	Chr1	12010000	12010100				Chr2	3299100	3299200				Chr3	1968200	1968300
Chr1	15066900	15067000	Chr1	13060600	13060700	Chr3	13592300	13592400	Chr1	12010300	12010400				Chr2	3299400	3299500				Chr3	1968300	1968400
Chr1	15067000	15067100	Chr1	13084100	13084200	Chr3	13595900	13596000	Chr1	12012900	12013000				Chr2	3303000	3303100				Chr3	1968400	1968500
Chr1	15067100	15067200	Chr1	13085300	13085400	Chr3	13596100	13596200	Chr1	12016900	12017000				Chr2	3303100	3303200				Chr3	1968500	1968600
Chr1	15067200	15067300	Chr1	13085400	13085500	Chr3	13596400	13596500	Chr1	12022600	12022700				Chr2	3303200	3303300				Chr3	1968600	1968700
Chr1	15067300	15067400	Chr1	13085500	13085600	Chr3	13598600	13598700	Chr1	12022700	12022800				Chr2	3303300	3303400				Chr3	1968700	1968800
Chr1	15067500	15067600	Chr1	13085600	13085700	Chr3	13598700	13598800	Chr1	12041100	12041200				Chr2	3303400	3303500				Chr3	1968800	1968900
Chr1	15067800	15067900	Chr1	13087400	13087500	Chr3	13631900	13632000	Chr1	12041200	12041300				Chr2	3303600	3303700				Chr3	1968900	1969000
Chr1	15068400	15068500	Chr1	13087500	13087600	Chr3	13650900	13651000	Chr1	12059900	12060000				Chr2	3303700	3303800				Chr3	1969000	1969100
Chr1	15068500	15068600	Chr1	13087700	13087800	Chr3	13651100	13651200	Chr1	12062300	12062400				Chr2	3303800	3303900				Chr3	1969100	1969200
Chr1	15072900	15073000	Chr1	13088300	13088400	Chr3	13684400	13684500	Chr1	12062400	12062500				Chr2	3304100	3304200				Chr3	1969200	1969300
Chr1	15074200	15074300	Chr1	13108700	13108800	Chr3	13697200	13697300	Chr1	12076700	12076800				Chr2	3311500	3311600				Chr3	1969300	1969400
Chr1	15074300	15074400	Chr1	13108800	13108900	Chr3	13698400	13698500	Chr1	12078100	12078200				Chr2	3311600	3311700				Chr3	1969400	1969500
Chr1	15074500	15074600	Chr1	13109000	13109100	Chr3	13698500	13698600	Chr1	12078500	12078600				Chr2	3311700	3311800				Chr3	1969500	1969600
Chr1	15074600	15074700	Chr1	13109100	13109200	Chr3	13698700	13698800	Chr1	12080700	12080800				Chr2	3311800	3311900				Chr3	1969600	1969700
Chr1	15074900	15075000	Chr1	13110300	13110400	Chr3	13700000	13700100	Chr1	12084200	12084300				Chr2	3311900	3312000				Chr3	1969700	1969800
Chr1	15075000	15075100	Chr1	13138400	13138500	Chr3	13700500	13700600	Chr1	12084300	12084400				Chr2	3312400	3312500				Chr3	1969800	1969900
Chr1	15081900	15082000	Chr1	13148300	13148400	Chr3	13701600	13701700	Chr1	12097400	12097500				Chr2	3312600	3312700				Chr3	1969900	1970000
Chr1	15082000	15082100	Chr1	13151900	13152000	Chr3	13702200	13702300	Chr1	12097500	12097600				Chr2	3313700	3313800				Chr3	1970000	1970100
Chr1	15082100	15082200	Chr1	13152000	13152100	Chr3	13703200	13703300	Chr1	12097600	12097700				Chr2	3313800	3313900				Chr3	1970100	1970200
Chr1	15082200	15082300	Chr1	13152600	13152700	Chr3	13703400	13703500	Chr1	12097800	12097900				Chr2	3313900	3314000				Chr3	1970200	1970300
Chr1	15082300	15082400	Chr1	13152800	13152900	Chr3	13703900	13704000	Chr1	12133200	12133300				Chr2	3314300	3314400				Chr3	1970300	1970400
Chr1	15082400	15082500	Chr1	13155800	13155900	Chr3	13705000	13705100	Chr1	12137600	12137700				Chr2	3314600	3314700				Chr3	1970400	1970500
Chr1	15082500	15082600	Chr1	13166300	13166400	Chr3	13706000	13706100	Chr1	12138800	12138900				Chr2	3314700	3314800				Chr3	2105000	2105100
Chr1	15082600	15082700	Chr1	13167100	13167200	Chr3	13706200	13706300	Chr1	12138900	12139000				Chr2	3314900	3315000				Chr3	2178100	2178200
Chr1	15082700	15082800	Chr1	13167200	13167300	Chr3	13706400	13706500	Chr1	12142400	12142500				Chr2	3315000	3315100				Chr3	2178200	2178300
Chr1	15082800	15082900	Chr1	13188900	13189000	Chr3	13707400	13707500	Chr1	12142800	12142900				Chr2	3328700	3328800				Chr3	2178300	2178400
Chr1	15083100	15083200	Chr1	13190800	13190900	Chr3	13707700	13707800	Chr1	12143000	12143100				Chr2	3328800	3328900				Chr3	2253700	2253800
Chr1	15083200	15083300	Chr1	13190900	13191000	Chr3	13708000	13708100	Chr1	12176100	12176200				Chr2	3331500	3331600				Chr3	2606600	2606700
Chr1	15083300	15083400	Chr1	13191600	13191700	Chr3	13709000	13709100	Chr1	12176800	12176900				Chr2	3331600	3331700				Chr3	2718400	2718500
Chr1	15083400	15083500	Chr1	13199600	13199700	Chr3	13709500	13709600	Chr1	12183900	12184000				Chr2	3331700	3331800				Chr3	2840700	2840800
Chr1	15083700	15083800	Chr1	13199700	13199800	Chr3	13709700	13709800	Chr1	12215100	12215200				Chr2	3331800	3331900				Chr3	2841000	2841100
Chr1	15083800	15083900	Chr1	13201600	13201700	Chr3	13710000	13710100	Chr1	12218900	12219000				Chr2	3331900	3332000				Chr3	2841100	2841200
Chr1	15083900	15084000	Chr1	13215100	13215200	Chr3	13711200	13711300	Chr1	12240600	12240700				Chr2	3332000	3332100				Chr3	2841400	2841500
Chr1	15084000	15084100	Chr1	13224200	13224300	Chr3	13711700	13711800	Chr1	12240700	12240800				Chr2	3332700	3332800				Chr3	2841500	2841600
Chr1	15084100	15084200	Chr1	13230600	13230700	Chr3	13713000	13713100	Chr1	12263300	12263400				Chr2	3338500	3338600				Chr3	2841600	2841700
Chr1	15084200	15084300	Chr1	13230700	13230800	Chr3	13713200	13713300	Chr1	12263400	12263500				Chr2	3341100	3341200				Chr3	2842000	2842100
Chr1	15084300	15084400	Chr1	13236000	13236100	Chr3	13713300	13713400	Chr1	12297600	12297700				Chr2	3342100	3342200				Chr3	2842100	2842200
Chr1	15084400	15084500	Chr1	13237500	13237600	Chr3	13714200	13714300	Chr1	12299200	12299300				Chr2	3342200	3342300				Chr3	2842300	2842400
Chr1	15084500	15084600	Chr1	13241100	13241200	Chr3	13714300	13714400	Chr1	12299300	12299400				Chr2	3346800	3346900				Chr3	2842500	2842600
Chr1	15084600	15084700	Chr1	13241500	13241600	Chr3	13714700	13714800	Chr1	12302900	12303000				Chr2	3347000	3347100				Chr3	2842700	2842800
Chr1	15084700	15084800	Chr1	13242500	13242600	Chr3	13714800	13714900	Chr1	12303000	12303100				Chr2	3347100	3347200				Chr3	2842800	2842900
Chr1	15084800	15084900	Chr1	13242600	13242700	Chr3	13715300	13715400	Chr1	12303100	12303200				Chr2	3347300	3347400				Chr3	2843100	2843200
Chr1	15084900	15085000	Chr1	13242900	13243000	Chr3	13716800	13716900	Chr1	12328100	12328200				Chr2	3347400	3347500				Chr3	2843600	2843700
Chr1	15085100	15085200	Chr1	13244000	13244100	Chr3	13718300	13718400	Chr1	12328200	12328300				Chr2	3347700	3347800				Chr3	2889700	2889800
Chr1	15085200	15085300	Chr1	13247500	13247600	Chr3	13718800	13718900	Chr1	12328300	12328400				Chr2	3361600	3361700				Chr3	2889800	2889900
Chr1	15085300	15085400	Chr1	13248100	13248200	Chr3	13720300	13720400	Chr1	12328500	12328600				Chr2	3362100	3362200				Chr3	2890100	2890200
Chr1	15085400	15085500	Chr1	13248400	13248500	Chr3	13721300	13721400	Chr1	12328700	12328800				Chr2	3362200	3362300				Chr3	2918400	2918500
Chr1	15085500	15085600	Chr1	13250600	13250700	Chr3	13721800	13721900	Chr1	12329000	12329100				Chr2	3362300	3362400				Chr3	2944600	2944700
Chr1	15085600	15085700	Chr1	13250700	13250800	Chr3	13722800	13722900	Chr1	12329300	12329400				Chr2	3362500	3362600				Chr3	3238300	3238400
Chr1	15085700	15085800	Chr1	13256900	13257000	Chr3	13723300	13723400	Chr1	12329500	12329600				Chr2	3362700	3362800				Chr3	3238400	3238500
Chr1	15085800	15085900	Chr1	13257000	13257100	Chr3	13725100	13725200	Chr1	12329900	12330000				Chr2	3362800	3362900				Chr3	3366300	3366400
Chr1	15085900	15086000	Chr1	13261400	13261500	Chr3	13725300	13725400	Chr1	12333900	12334000				Chr2	3362900	3363000				Chr3	3419500	3419600
Chr1	15086000	15086100	Chr1	13261500	13261600	Chr3	13725900	13726000	Chr1	12337700	12337800				Chr2	3363000	3363100				Chr3	3481200	3481300
Chr1	15179100	15179200	Chr1	13287200	13287300	Chr3	13747600	13747700	Chr1	12361600	12361700				Chr2	3363100	3363200				Chr3	3535100	3535200
Chr1	15179400	15179500	Chr1	13288700	13288800	Chr3	13749900	13750000	Chr1	12362300	12362400				Chr2	3363400	3363500				Chr3	3535200	3535300
Chr1	15180000	15180100	Chr1	13288900	13289000	Chr3	13750100	13750200	Chr1	12363600	12363700				Chr2	3363500	3363600				Chr3	3572400	3572500
Chr1	15180400	15180500	Chr1	13301400	13301500	Chr3	13750200	13750300	Chr1	12364400	12364500				Chr2	3363600	3363700				Chr3	3572500	3572600
Chr1	15180500	15180600	Chr1	13306000	13306100	Chr3	13750400	13750500	Chr1	12364500	12364600				Chr2	3363700	3363800				Chr3	3575800	3575900
Chr1	15181200	15181300	Chr1	13306700	13306800	Chr3	13750700	13750800	Chr1	12364600	12364700				Chr2	3363800	3363900				Chr3	3622700	3622800
Chr1	15181400	15181500	Chr1	13397600	13397700	Chr3	13751400	13751500	Chr1	12364800	12364900				Chr2	3363900	3364000				Chr3	3942000	3942100
Chr1	15181500	15181600	Chr1	13401100	13401200	Chr3	13751700	13751800	Chr1	12365100	12365200				Chr2	3364000	3364100				Chr3	4061100	4061200
Chr1	15183500	15183600	Chr1	13407400	13407500	Chr3	13756500	13756600	Chr1	12365200	12365300				Chr2	3364100	3364200				Chr3	4061400	4061500
Chr1	15186900	15187000	Chr1	13407800	13407900	Chr3	13766900	13767000	Chr1	12365300	12365400				Chr2	3364200	3364300				Chr3	4254500	4254600
Chr1	15188000	15188100	Chr1	13436900	13437000	Chr3	13767900	13768000	Chr1	12365400	12365500				Chr2	3367600	3367700				Chr3	4411200	4411300
Chr1	15188100	15188200	Chr1	13485800	13485900	Chr3	13768400	13768500	Chr1	12365700	12365800				Chr2	3368000	3368100				Chr3	4561100	4561200
Chr1	15188800	15188900	Chr1	13485900	13486000	Chr3	13768900	13769000	Chr1	12379200	12379300				Chr2	3368500	3368600				Chr3	4730000	4730100
Chr1	15189300	15189400	Chr1	13487000	13487100	Chr3	13769100	13769200	Chr1	12379700	12379800				Chr2	3369000	3369100				Chr3	4731400	4731500
Chr1	15189400	15189500	Chr1	13489400	13489500	Chr3	13770900	13771000	Chr1	12401800	12401900				Chr2	3369100	3369200				Chr3	4951600	4951700
Chr1	15189500	15189600	Chr1	13490100	13490200	Chr3	13771000	13771100	Chr1	12477000	12477100				Chr2	3369300	3369400				Chr3	4998100	4998200
Chr1	15189600	15189700	Chr1	13490300	13490400	Chr3	13771400	13771500	Chr1	12483100	12483200				Chr2	3369400	3369500				Chr3	5189400	5189500
Chr1	15189700	15189800	Chr1	13495900	13496000	Chr3	13771500	13771600	Chr1	12483200	12483300				Chr2	3369500	3369600				Chr3	5213000	5213100
Chr1	15190800	15190900	Chr1	13508000	13508100	Chr3	13772500	13772600	Chr1	12483300	12483400				Chr2	3369700	3369800				Chr3	5213100	5213200
Chr1	15191400	15191500	Chr1	13508100	13508200	Chr3	13773000	13773100	Chr1	12525200	12525300				Chr2	3369800	3369900				Chr3	5213600	5213700
Chr1	15191500	15191600	Chr1	13508200	13508300	Chr3	13773500	13773600	Chr1	12525600	12525700				Chr2	3373900	3374000				Chr3	5213800	5213900
Chr1	15191600	15191700	Chr1	13508500	13508600	Chr3	13773700	13773800	Chr1	12530200	12530300				Chr2	3377800	3377900				Chr3	5275100	5275200
Chr1	15191700	15191800	Chr1	13508900	13509000	Chr3	13774300	13774400	Chr1	12530300	12530400				Chr2	3378100	3378200				Chr3	5387200	5387300
Chr1	15192200	15192300	Chr1	13509200	13509300	Chr3	13774500	13774600	Chr1	12556100	12556200				Chr2	3378900	3379000				Chr3	5469400	5469500
Chr1	15192300	15192400	Chr1	13509300	13509400	Chr3	13775000	13775100	Chr1	12556200	12556300				Chr2	3383300	3383400				Chr3	5579500	5579600
Chr1	15192600	15192700	Chr1	13511000	13511100	Chr3	13776000	13776100	Chr1	12562400	12562500				Chr2	3383400	3383500				Chr3	5579600	5579700
Chr1	15192700	15192800	Chr1	13511600	13511700	Chr3	13776200	13776300	Chr1	12562800	12562900				Chr2	3383500	3383600				Chr3	5579700	5579800
Chr1	15415900	15416000	Chr1	13512100	13512200	Chr3	13776300	13776400	Chr1	12562900	12563000				Chr2	3386400	3386500				Chr3	5580200	5580300
Chr1	15416000	15416100	Chr1	13512200	13512300	Chr3	13776500	13776600	Chr1	12563300	12563400				Chr2	3386600	3386700				Chr3	5580500	5580600
Chr1	15416100	15416200	Chr1	13513700	13513800	Chr3	13776800	13776900	Chr1	12563700	12563800				Chr2	3386700	3386800				Chr3	5582500	5582600
Chr1	15416300	15416400	Chr1	13514200	13514300	Chr3	13777000	13777100	Chr1	12564000	12564100				Chr2	3386800	3386900				Chr3	5593500	5593600
Chr1	15416900	15417000	Chr1	13514900	13515000	Chr3	13778700	13778800	Chr1	12565600	12565700				Chr2	3388000	3388100				Chr3	5593600	5593700
Chr1	15417300	15417400	Chr1	13515200	13515300	Chr3	13778800	13778900	Chr1	12566300	12566400				Chr2	3388100	3388200				Chr3	5593700	5593800
Chr1	15417500	15417600	Chr1	13515300	13515400	Chr3	13779300	13779400	Chr1	12571500	12571600				Chr2	3388200	3388300				Chr3	5830000	5830100
Chr1	15417600	15417700	Chr1	13515800	13515900	Chr3	13779500	13779600	Chr1	12577800	12577900				Chr2	3388300	3388400				Chr3	5830100	5830200
Chr1	15417700	15417800	Chr1	13516400	13516500	Chr3	13779800	13779900	Chr1	12577900	12578000				Chr2	3388400	3388500				Chr3	5862000	5862100
Chr1	15419300	15419400	Chr1	13522200	13522300	Chr3	13780500	13780600	Chr1	12593100	12593200				Chr2	3388500	3388600				Chr3	5862100	5862200
Chr1	15422400	15422500	Chr1	13522900	13523000	Chr3	13780600	13780700	Chr1	12593200	12593300				Chr2	3392300	3392400				Chr3	5862200	5862300
Chr1	15422500	15422600	Chr1	13524400	13524500	Chr3	13781100	13781200	Chr1	12593300	12593400				Chr2	3392400	3392500				Chr3	5862300	5862400
Chr1	15423300	15423400	Chr1	13524500	13524600	Chr3	13782100	13782200	Chr1	12610800	12610900				Chr2	3394500	3394600				Chr3	5953000	5953100
Chr1	15423400	15423500	Chr1	13525000	13525100	Chr3	13782600	13782700	Chr1	12619300	12619400				Chr2	3394600	3394700				Chr3	6193100	6193200
Chr1	15432200	15432300	Chr1	13544700	13544800	Chr3	13783600	13783700	Chr1	12662700	12662800				Chr2	3397100	3397200				Chr3	6244600	6244700
Chr1	15445400	15445500	Chr1	13565500	13565600	Chr3	13784600	13784700	Chr1	12662800	12662900				Chr2	3397200	3397300				Chr3	6540600	6540700
Chr1	15445900	15446000	Chr1	13568600	13568700	Chr3	13784900	13785000	Chr1	12691400	12691500				Chr2	3397600	3397700				Chr3	6540700	6540800
Chr1	15446500	15446600	Chr1	13568700	13568800	Chr3	13800700	13800800	Chr1	12691500	12691600				Chr2	3398000	3398100				Chr3	6663700	6663800
Chr1	15446800	15446900	Chr1	13568800	13568900	Chr3	13811700	13811800	Chr1	12692400	12692500				Chr2	3399400	3399500				Chr3	7104100	7104200
Chr1	15448500	15448600	Chr1	13568900	13569000	Chr3	13811900	13812000	Chr1	12713500	12713600				Chr2	3399500	3399600				Chr3	7104200	7104300
Chr1	15448700	15448800	Chr1	13569000	13569100	Chr3	13812000	13812100	Chr1	12713600	12713700				Chr2	3399600	3399700				Chr3	7104300	7104400
Chr1	15448800	15448900	Chr1	13569100	13569200	Chr3	13813200	13813300	Chr1	12717100	12717200				Chr2	3399700	3399800				Chr3	7104600	7104700
Chr1	15450600	15450700	Chr1	13569200	13569300	Chr3	13813300	13813400	Chr1	12717600	12717700				Chr2	3400700	3400800				Chr3	7224200	7224300
Chr1	15450700	15450800	Chr1	13569300	13569400	Chr3	13813700	13813800	Chr1	12718800	12718900				Chr2	3402300	3402400				Chr3	7376900	7377000
Chr1	15450800	15450900	Chr1	13572400	13572500	Chr3	13813800	13813900	Chr1	12726400	12726500				Chr2	3405600	3405700				Chr3	7567400	7567500
Chr1	15450900	15451000	Chr1	13584900	13585000	Chr3	13814500	13814600	Chr1	12727900	12728000				Chr2	3411000	3411100				Chr3	7682500	7682600
Chr1	15451600	15451700	Chr1	13586400	13586500	Chr3	13814700	13814800	Chr1	12728000	12728100				Chr2	3411100	3411200				Chr3	7795600	7795700
Chr1	15451700	15451800	Chr1	13599600	13599700	Chr3	13814800	13814900	Chr1	12728200	12728300				Chr2	3413800	3413900				Chr3	7796100	7796200
Chr1	15451800	15451900	Chr1	13621500	13621600	Chr3	13815000	13815100	Chr1	12728300	12728400				Chr2	3413900	3414000				Chr3	7848800	7848900
Chr1	15451900	15452000	Chr1	13621600	13621700	Chr3	13815200	13815300	Chr1	12728400	12728500				Chr2	3414800	3414900				Chr3	7848900	7849000
Chr1	15452000	15452100	Chr1	13639100	13639200	Chr3	13815300	13815400	Chr1	12730200	12730300				Chr2	3416000	3416100				Chr3	7849900	7850000
Chr1	15452100	15452200	Chr1	13639200	13639300	Chr3	13815500	13815600	Chr1	12730300	12730400				Chr2	3420300	3420400				Chr3	7850200	7850300
Chr1	15453100	15453200	Chr1	13639500	13639600	Chr3	13836700	13836800	Chr1	12733400	12733500				Chr2	3426000	3426100				Chr3	7852800	7852900
Chr1	15453600	15453700	Chr1	13640100	13640200	Chr3	13838700	13838800	Chr1	12733700	12733800				Chr2	3426100	3426200				Chr3	7852900	7853000
Chr1	15453700	15453800	Chr1	13644800	13644900	Chr3	13839200	13839300	Chr1	12733800	12733900				Chr2	3426200	3426300				Chr3	7853000	7853100
Chr1	15453800	15453900	Chr1	13644900	13645000	Chr3	13839700	13839800	Chr1	12733900	12734000				Chr2	3427200	3427300				Chr3	7853300	7853400
Chr1	15454000	15454100	Chr1	13645800	13645900	Chr3	13849600	13849700	Chr1	12734400	12734500				Chr2	3427300	3427400				Chr3	7858900	7859000
Chr1	15455600	15455700	Chr1	13650400	13650500	Chr3	13850600	13850700	Chr1	12779000	12779100				Chr2	3427400	3427500				Chr3	7859800	7859900
Chr1	15455700	15455800	Chr1	13650500	13650600	Chr3	13852100	13852200	Chr1	12782400	12782500				Chr2	3427500	3427600				Chr3	7859900	7860000
Chr1	15455800	15455900	Chr1	13651100	13651200	Chr3	13852500	13852600	Chr1	12799400	12799500				Chr2	3432600	3432700				Chr3	7860000	7860100
Chr1	15455900	15456000	Chr1	13652600	13652700	Chr3	13853500	13853600	Chr1	12813700	12813800				Chr2	3432700	3432800				Chr3	7860200	7860300
Chr1	15456000	15456100	Chr1	13652700	13652800	Chr3	13853700	13853800	Chr1	12813800	12813900				Chr2	3432800	3432900				Chr3	7860300	7860400
Chr1	15456500	15456600	Chr1	13653500	13653600	Chr3	13853800	13853900	Chr1	12816300	12816400				Chr2	3437500	3437600				Chr3	7861900	7862000
Chr1	15460700	15460800	Chr1	13659300	13659400	Chr3	13855000	13855100	Chr1	12818200	12818300				Chr2	3437600	3437700				Chr3	7862000	7862100
Chr1	15462000	15462100	Chr1	13659400	13659500	Chr3	13859700	13859800	Chr1	12818300	12818400				Chr2	3437700	3437800				Chr3	7862100	7862200
Chr1	15462600	15462700	Chr1	13659500	13659600	Chr3	13861200	13861300	Chr1	12827200	12827300				Chr2	3437900	3438000				Chr3	7862400	7862500
Chr1	15462700	15462800	Chr1	13659600	13659700	Chr3	13861700	13861800	Chr1	12839400	12839500				Chr2	3438000	3438100				Chr3	8108100	8108200
Chr1	15462800	15462900	Chr1	13659800	13659900	Chr3	13862000	13862100	Chr1	12839500	12839600				Chr2	3438100	3438200				Chr3	8114300	8114400
Chr1	15462900	15463000	Chr1	13659900	13660000	Chr3	13863200	13863300	Chr1	12855400	12855500				Chr2	3441800	3441900				Chr3	8979400	8979500
Chr1	15463000	15463100	Chr1	13660000	13660100	Chr3	13866800	13866900	Chr1	12874200	12874300				Chr2	3442900	3443000				Chr3	8979500	8979600
Chr1	15463800	15463900	Chr1	13660100	13660200	Chr3	13911900	13912000	Chr1	12874300	12874400				Chr2	3443700	3443800				Chr3	9417600	9417700
Chr1	15464100	15464200	Chr1	13660200	13660300	Chr3	14042200	14042300	Chr1	12875500	12875600				Chr2	3444300	3444400				Chr3	9526000	9526100
Chr1	15464900	15465000	Chr1	13661100	13661200	Chr3	14057500	14057600	Chr1	12876300	12876400				Chr2	3444400	3444500				Chr3	9722800	9722900
Chr1	15467700	15467800	Chr1	13661200	13661300	Chr3	14174500	14174600	Chr1	12876400	12876500				Chr2	3444500	3444600				Chr3	9828100	9828200
Chr1	15468900	15469000	Chr1	13661300	13661400	Chr3	14178500	14178600	Chr1	12876700	12876800				Chr2	3444600	3444700				Chr3	9828400	9828500
Chr1	15469000	15469100	Chr1	13661400	13661500	Chr3	14179000	14179100	Chr1	12896400	12896500				Chr2	3444900	3445000				Chr3	9839100	9839200
Chr1	15469600	15469700	Chr1	13661600	13661700	Chr3	14182400	14182500	Chr1	12901800	12901900				Chr2	3445000	3445100				Chr3	10318200	10318300
Chr1	15469700	15469800	Chr1	13661700	13661800	Chr3	14182900	14183000	Chr1	12906600	12906700				Chr2	3448300	3448400				Chr3	10318300	10318400
Chr1	15469800	15469900	Chr1	13661800	13661900	Chr3	14184200	14184300	Chr1	12906800	12906900				Chr2	3448500	3448600				Chr3	10324600	10324700
Chr1	15469900	15470000	Chr1	13661900	13662000	Chr3	14185300	14185400	Chr1	12906900	12907000				Chr2	3448900	3449000				Chr3	10324700	10324800
Chr1	15470400	15470500	Chr1	13662000	13662100	Chr3	14187700	14187800	Chr1	12907700	12907800				Chr2	3449600	3449700				Chr3	10328500	10328600
Chr1	15471000	15471100	Chr1	13662100	13662200	Chr3	14191700	14191800	Chr1	12927000	12927100				Chr2	3450700	3450800				Chr3	10328600	10328700
Chr1	15475900	15476000	Chr1	13662300	13662400	Chr3	14191800	14191900	Chr1	12930300	12930400				Chr2	3450800	3450900				Chr3	10328700	10328800
Chr1	15476500	15476600	Chr1	13662800	13662900	Chr3	14191900	14192000	Chr1	12942600	12942700				Chr2	3451300	3451400				Chr3	10329000	10329100
Chr1	15476600	15476700	Chr1	13662900	13663000	Chr3	14192000	14192100	Chr1	12942700	12942800				Chr2	3451700	3451800				Chr3	10752400	10752500
Chr1	15476700	15476800	Chr1	13663000	13663100	Chr3	14192100	14192200	Chr1	12958100	12958200				Chr2	3451800	3451900				Chr3	10759400	10759500
Chr1	15476800	15476900	Chr1	13664200	13664300	Chr3	14192200	14192300	Chr1	12960000	12960100				Chr2	3451900	3452000				Chr3	11075500	11075600
Chr1	15476900	15477000	Chr1	13664300	13664400	Chr3	14192300	14192400	Chr1	12966800	12966900				Chr2	3452000	3452100				Chr3	11075600	11075700
Chr1	15477700	15477800	Chr1	13664400	13664500	Chr3	14192400	14192500	Chr1	12980300	12980400				Chr2	3452100	3452200				Chr3	11313400	11313500
Chr1	15482800	15482900	Chr1	13664800	13664900	Chr3	14192500	14192600	Chr1	12987800	12987900				Chr2	3452900	3453000				Chr3	11482000	11482100
Chr1	15483400	15483500	Chr1	13664900	13665000	Chr3	14192600	14192700	Chr1	12993000	12993100				Chr2	3453000	3453100				Chr3	11482700	11482800
Chr1	15483500	15483600	Chr1	13665500	13665600	Chr3	14192700	14192800	Chr1	12993500	12993600				Chr2	3461900	3462000				Chr3	11482800	11482900
Chr1	15483600	15483700	Chr1	13665900	13666000	Chr3	14192800	14192900	Chr1	12995300	12995400				Chr2	3462000	3462100				Chr3	11586100	11586200
Chr1	15483700	15483800	Chr1	13666000	13666100	Chr3	14192900	14193000	Chr1	12995400	12995500				Chr2	3462100	3462200				Chr3	11586200	11586300
Chr1	15483800	15483900	Chr1	13666300	13666400	Chr3	14193000	14193100	Chr1	13008800	13008900				Chr2	3462200	3462300				Chr3	11586300	11586400
Chr1	15485000	15485100	Chr1	13666400	13666500	Chr3	14193700	14193800	Chr1	13016000	13016100				Chr2	3467200	3467300				Chr3	11959200	11959300
Chr1	15487000	15487100	Chr1	13666500	13666600	Chr3	14193800	14193900	Chr1	13016100	13016200				Chr2	3467300	3467400				Chr3	13434100	13434200
Chr1	15488400	15488500	Chr1	13666600	13666700	Chr3	14193900	14194000	Chr1	13016400	13016500				Chr2	3467400	3467500				Chr3	13534000	13534100
Chr1	15492300	15492400	Chr1	13666700	13666800	Chr3	14194000	14194100	Chr1	13016500	13016600				Chr2	3467900	3468000				Chr3	13534100	13534200
Chr1	15493200	15493300	Chr1	13666900	13667000	Chr3	14194100	14194200	Chr1	13016900	13017000				Chr2	3468000	3468100				Chr3	13536400	13536500
Chr1	15493300	15493400	Chr1	13667000	13667100	Chr3	14194300	14194400	Chr1	13017000	13017100				Chr2	3468200	3468300				Chr3	13536500	13536600
Chr1	15494000	15494100	Chr1	13667200	13667300	Chr3	14194400	14194500	Chr1	13017100	13017200				Chr2	3468300	3468400				Chr3	13536600	13536700
Chr1	15494100	15494200	Chr1	13667300	13667400	Chr3	14194500	14194600	Chr1	13017200	13017300				Chr2	3468400	3468500				Chr3	13537600	13537700
Chr1	15494400	15494500	Chr1	13675500	13675600	Chr3	14194700	14194800	Chr1	13017300	13017400				Chr2	3468500	3468600				Chr3	13540500	13540600
Chr1	15495500	15495600	Chr1	13675600	13675700	Chr3	14194900	14195000	Chr1	13017500	13017600				Chr2	3468600	3468700				Chr3	13541200	13541300
Chr1	15496300	15496400	Chr1	13682500	13682600	Chr3	14195100	14195200	Chr1	13029500	13029600				Chr2	3468700	3468800				Chr3	13593100	13593200
Chr1	15500700	15500800	Chr1	13705900	13706000	Chr3	14195200	14195300	Chr1	13030300	13030400				Chr2	3471900	3472000				Chr3	13594100	13594200
Chr1	15501500	15501600	Chr1	13709000	13709100	Chr3	14195300	14195400	Chr1	13036900	13037000				Chr2	3472100	3472200				Chr3	13596100	13596200
Chr1	15501600	15501700	Chr1	13711400	13711500	Chr3	14195400	14195500	Chr1	13042700	13042800				Chr2	3473600	3473700				Chr3	13600100	13600200
Chr1	15501800	15501900	Chr1	13711500	13711600	Chr3	14195700	14195800	Chr1	13050000	13050100				Chr2	3489400	3489500				Chr3	13684400	13684500
Chr1	15502200	15502300	Chr1	13711600	13711700	Chr3	14195800	14195900	Chr1	13057200	13057300				Chr2	3489500	3489600				Chr3	13684900	13685000
Chr1	15502300	15502400	Chr1	13711800	13711900	Chr3	14195900	14196000	Chr1	13058800	13058900				Chr2	3489600	3489700				Chr3	13697200	13697300
Chr1	15502800	15502900	Chr1	13711900	13712000	Chr3	14196000	14196100	Chr1	13059100	13059200				Chr2	3489700	3489800				Chr3	13698700	13698800
Chr1	15503600	15503700	Chr1	13712100	13712200	Chr3	14196100	14196200	Chr1	13059500	13059600				Chr2	3492600	3492700				Chr3	13705000	13705100
Chr1	15503700	15503800	Chr1	13712200	13712300	Chr3	14196700	14196800	Chr1	13059600	13059700				Chr2	3494300	3494400				Chr3	13708000	13708100
Chr1	15508400	15508500	Chr1	13712300	13712400	Chr3	14197000	14197100	Chr1	13059700	13059800				Chr2	3494400	3494500				Chr3	13711500	13711600
Chr1	15508800	15508900	Chr1	13768500	13768600	Chr3	14197200	14197300	Chr1	13059800	13059900				Chr2	3494500	3494600				Chr3	13714500	13714600
Chr1	15509000	15509100	Chr1	13769100	13769200	Chr3	14197600	14197700	Chr1	13060100	13060200				Chr2	3494700	3494800				Chr3	13715000	13715100
Chr1	15512300	15512400	Chr1	13769500	13769600	Chr3	14197700	14197800	Chr1	13060200	13060300				Chr2	3494800	3494900				Chr3	13750700	13750800
Chr1	15512400	15512500	Chr1	13769800	13769900	Chr3	14197800	14197900	Chr1	13060600	13060700				Chr2	3495000	3495100				Chr3	13754900	13755000
Chr1	15518000	15518100	Chr1	13770800	13770900	Chr3	14197900	14198000	Chr1	13065100	13065200				Chr2	3495100	3495200				Chr3	13755900	13756000
Chr1	15537100	15537200	Chr1	13770900	13771000	Chr3	14198100	14198200	Chr1	13070700	13070800				Chr2	3495400	3495500				Chr3	13756500	13756600
Chr1	15539000	15539100	Chr1	13773400	13773500	Chr3	14198200	14198300	Chr1	13085500	13085600				Chr2	3495500	3495600				Chr3	13778800	13778900
Chr1	15539500	15539600	Chr1	13773500	13773600	Chr3	14198300	14198400	Chr1	13085600	13085700				Chr2	3495600	3495700				Chr3	13794100	13794200
Chr1	15539700	15539800	Chr1	13773900	13774000	Chr3	14198400	14198500	Chr1	13087400	13087500				Chr2	3495800	3495900				Chr3	13798500	13798600
Chr1	15539900	15540000	Chr1	13774000	13774100	Chr3	14198500	14198600	Chr1	13087500	13087600				Chr2	3495900	3496000				Chr3	13800600	13800700
Chr1	15540000	15540100	Chr1	13774300	13774400	Chr3	14198600	14198700	Chr1	13088100	13088200				Chr2	3496100	3496200				Chr3	13800700	13800800
Chr1	15540100	15540200	Chr1	13774400	13774500	Chr3	14198700	14198800	Chr1	13088200	13088300				Chr2	3496300	3496400				Chr3	13811900	13812000
Chr1	15540200	15540300	Chr1	13774500	13774600	Chr3	14198800	14198900	Chr1	13088300	13088400				Chr2	3496400	3496500				Chr3	13812000	13812100
Chr1	15540300	15540400	Chr1	13774700	13774800	Chr3	14198900	14199000	Chr1	13108700	13108800				Chr2	3496500	3496600				Chr3	13813000	13813100
Chr1	15540400	15540500	Chr1	13774900	13775000	Chr3	14199000	14199100	Chr1	13108800	13108900				Chr2	3497300	3497400				Chr3	13814000	13814100
Chr1	15540500	15540600	Chr1	13776000	13776100	Chr3	14199100	14199200	Chr1	13119500	13119600				Chr2	3497400	3497500				Chr3	13814500	13814600
Chr1	15540600	15540700	Chr1	13776900	13777000	Chr3	14199200	14199300	Chr1	13131400	13131500				Chr2	3497500	3497600				Chr3	13815000	13815100
Chr1	15540700	15540800	Chr1	13777500	13777600	Chr3	14199300	14199400	Chr1	13134100	13134200				Chr2	3497600	3497700				Chr3	13815500	13815600
Chr1	15542100	15542200	Chr1	13785300	13785400	Chr3	14199400	14199500	Chr1	13134200	13134300				Chr2	3502100	3502200				Chr3	13835100	13835200
Chr1	15543700	15543800	Chr1	13785400	13785500	Chr3	14199500	14199600	Chr1	13135200	13135300				Chr2	3503100	3503200				Chr3	13835200	13835300
Chr1	15543800	15543900	Chr1	13787100	13787200	Chr3	14199700	14199800	Chr1	13138400	13138500				Chr2	3503200	3503300				Chr3	13835600	13835700
Chr1	15544000	15544100	Chr1	13787300	13787400	Chr3	14199800	14199900	Chr1	13139800	13139900				Chr2	3503400	3503500				Chr3	13835700	13835800
Chr1	15544800	15544900	Chr1	13787600	13787700	Chr3	14199900	14200000	Chr1	13148300	13148400				Chr2	3503500	3503600				Chr3	13836200	13836300
Chr1	15562700	15562800	Chr1	13788100	13788200	Chr3	14200100	14200200	Chr1	13148400	13148500				Chr2	3503600	3503700				Chr3	13836600	13836700
Chr1	15562800	15562900	Chr1	13788200	13788300	Chr3	14200200	14200300	Chr1	13152000	13152100				Chr2	3503700	3503800				Chr3	13836700	13836800
Chr1	15616400	15616500	Chr1	13793800	13793900	Chr3	14200300	14200400	Chr1	13152800	13152900				Chr2	3503900	3504000				Chr3	13838700	13838800
Chr1	15616500	15616600	Chr1	13794000	13794100	Chr3	14200400	14200500	Chr1	13155800	13155900				Chr2	3504000	3504100				Chr3	13839200	13839300
Chr1	15617200	15617300	Chr1	13794300	13794400	Chr3	14200500	14200600	Chr1	13155900	13156000				Chr2	3508000	3508100				Chr3	13839700	13839800
Chr1	15639500	15639600	Chr1	13796600	13796700	Chr3	14200600	14200700	Chr1	13156200	13156300				Chr2	3562100	3562200				Chr3	13847600	13847700
Chr1	15674100	15674200	Chr1	13796700	13796800	Chr3	14200700	14200800	Chr1	13166300	13166400				Chr2	3740800	3740900				Chr3	13849100	13849200
Chr1	15676300	15676400	Chr1	13796800	13796900	Chr3	14200800	14200900	Chr1	13167100	13167200				Chr2	3740900	3741000				Chr3	13849600	13849700
Chr1	15676700	15676800	Chr1	13797000	13797100	Chr3	14201000	14201100	Chr1	13167200	13167300				Chr2	3901700	3901800				Chr3	13850600	13850700
Chr1	15677300	15677400	Chr1	13797500	13797600	Chr3	14201100	14201200	Chr1	13171300	13171400				Chr2	4054400	4054500				Chr3	13852100	13852200
Chr1	15683200	15683300	Chr1	13797700	13797800	Chr3	14201200	14201300	Chr1	13173500	13173600				Chr2	4142300	4142400				Chr3	13852400	13852500
Chr1	15683500	15683600	Chr1	13798000	13798100	Chr3	14201300	14201400	Chr1	13179000	13179100				Chr2	4142400	4142500				Chr3	13852500	13852600
Chr1	15688500	15688600	Chr1	13798600	13798700	Chr3	14201400	14201500	Chr1	13188900	13189000				Chr2	4222200	4222300				Chr3	13853000	13853100
Chr1	15704900	15705000	Chr1	13799400	13799500	Chr3	14201500	14201600	Chr1	13192400	13192500				Chr2	4224800	4224900				Chr3	13853500	13853600
Chr1	15705100	15705200	Chr1	13799500	13799600	Chr3	14201600	14201700	Chr1	13192500	13192600				Chr2	4224900	4225000				Chr3	13855000	13855100
Chr1	15707200	15707300	Chr1	13799700	13799800	Chr3	14201700	14201800	Chr1	13212400	13212500				Chr2	4277900	4278000				Chr3	13857000	13857100
Chr1	15707300	15707400	Chr1	13799800	13799900	Chr3	14201800	14201900	Chr1	13212700	13212800				Chr2	4278000	4278100				Chr3	13859700	13859800
Chr1	15707400	15707500	Chr1	13811000	13811100	Chr3	14201900	14202000	Chr1	13215100	13215200				Chr2	4281700	4281800				Chr3	13861200	13861300
Chr1	15707600	15707700	Chr1	13812400	13812500	Chr3	14202000	14202100	Chr1	13215200	13215300				Chr2	4281800	4281900				Chr3	13861700	13861800
Chr1	15707700	15707800	Chr1	13812700	13812800	Chr3	14202100	14202200	Chr1	13220000	13220100				Chr2	4311300	4311400				Chr3	13863300	13863400
Chr1	15707900	15708000	Chr1	13828800	13828900	Chr3	14202200	14202300	Chr1	13230600	13230700				Chr2	4311400	4311500				Chr3	13864300	13864400
Chr1	15708100	15708200	Chr1	13829000	13829100	Chr3	14202300	14202400	Chr1	13230700	13230800				Chr2	4311700	4311800				Chr3	13866300	13866400
Chr1	15708300	15708400	Chr1	13830300	13830400	Chr3	14202400	14202500	Chr1	13230800	13230900				Chr2	4652100	4652200				Chr3	13866800	13866900
Chr1	15708400	15708500	Chr1	13831000	13831100	Chr3	14202500	14202600	Chr1	13234500	13234600				Chr2	5058400	5058500				Chr3	14172700	14172800
Chr1	15708700	15708800	Chr1	13831200	13831300	Chr3	14202600	14202700	Chr1	13236100	13236200				Chr2	5058500	5058600				Chr3	14178500	14178600
Chr1	15708900	15709000	Chr1	13831600	13831700	Chr3	14202700	14202800	Chr1	13237500	13237600				Chr2	5074100	5074200				Chr3	14178900	14179000
Chr1	15711000	15711100	Chr1	13832000	13832100	Chr3	14202800	14202900	Chr1	13241000	13241100				Chr2	5078200	5078300				Chr3	14179000	14179100
Chr1	15712500	15712600	Chr1	13851200	13851300	Chr3	14202900	14203000	Chr1	13241100	13241200				Chr2	5468900	5469000				Chr3	14182400	14182500
Chr1	15712700	15712800	Chr1	13852300	13852400	Chr3	14203000	14203100	Chr1	13241500	13241600				Chr2	5533500	5533600				Chr3	14182900	14183000
Chr1	15713600	15713700	Chr1	13852400	13852500	Chr3	14203100	14203200	Chr1	13248000	13248100				Chr2	5779100	5779200				Chr3	14186200	14186300
Chr1	15730600	15730700	Chr1	13854500	13854600	Chr3	14203200	14203300	Chr1	13248100	13248200				Chr2	5779200	5779300				Chr3	14187200	14187300
Chr1	15760800	15760900	Chr1	13863400	13863500	Chr3	14203300	14203400	Chr1	13248200	13248300				Chr2	5779300	5779400				Chr3	14192800	14192900
Chr1	15785300	15785400	Chr1	13863700	13863800	Chr3	14203400	14203500	Chr1	13256900	13257000				Chr2	5779700	5779800				Chr3	14192900	14193000
Chr1	15785400	15785500	Chr1	13863800	13863900	Chr3	14204100	14204200	Chr1	13257000	13257100				Chr2	5780700	5780800				Chr3	14193000	14193100
Chr1	15785800	15785900	Chr1	13863900	13864000	Chr3	14204200	14204300	Chr1	13257100	13257200				Chr2	5780800	5780900				Chr3	14196700	14196800
Chr1	15786000	15786100	Chr1	13864200	13864300	Chr3	14204300	14204400	Chr1	13259400	13259500				Chr2	5787300	5787400				Chr3	14197000	14197100
Chr1	15786100	15786200	Chr1	13869900	13870000	Chr3	14204400	14204500	Chr1	13287200	13287300				Chr2	5885200	5885300				Chr3	14197100	14197200
Chr1	15790400	15790500	Chr1	13870200	13870300	Chr3	14204500	14204600	Chr1	13287300	13287400				Chr2	5885400	5885500				Chr3	14197200	14197300
Chr1	15791300	15791400	Chr1	13870300	13870400	Chr3	14204700	14204800	Chr1	13288800	13288900				Chr2	5885500	5885600				Chr3	14197600	14197700
Chr1	15791600	15791700	Chr1	13881400	13881500	Chr3	14204800	14204900	Chr1	13288900	13289000				Chr2	5885600	5885700				Chr3	14197700	14197800
Chr1	15801700	15801800	Chr1	13881500	13881600	Chr3	14204900	14205000	Chr1	13300900	13301000				Chr2	5885700	5885800				Chr3	14197800	14197900
Chr1	15802000	15802100	Chr1	13882500	13882600	Chr3	14205100	14205200	Chr1	13301400	13301500				Chr2	5900300	5900400				Chr3	14197900	14198000
Chr1	15802100	15802200	Chr1	13883100	13883200	Chr3	14206800	14206900	Chr1	13312500	13312600				Chr2	5900500	5900600				Chr3	14198000	14198100
Chr1	15802600	15802700	Chr1	13883200	13883300	Chr3	14207000	14207100	Chr1	13313600	13313700				Chr2	6015000	6015100				Chr3	14198100	14198200
Chr1	15804700	15804800	Chr1	13883300	13883400	Chr3	14207300	14207400	Chr1	13346000	13346100				Chr2	6354800	6354900				Chr3	14198200	14198300
Chr1	15804800	15804900	Chr1	13883600	13883700	Chr3	14207500	14207600	Chr1	13346800	13346900				Chr2	6777700	6777800				Chr3	14198300	14198400
Chr1	15822000	15822100	Chr1	13883700	13883800	Chr3	14207800	14207900	Chr1	13355400	13355500				Chr2	6946700	6946800				Chr3	14198400	14198500
Chr1	15822600	15822700	Chr1	13883800	13883900	Chr3	14208100	14208200	Chr1	13357200	13357300				Chr2	6946800	6946900				Chr3	14198500	14198600
Chr1	15822700	15822800	Chr1	13883900	13884000	Chr3	14208300	14208400	Chr1	13357300	13357400				Chr2	6995400	6995500				Chr3	14198600	14198700
Chr1	15824300	15824400	Chr1	13884000	13884100	Chr3	14210800	14210900	Chr1	13377400	13377500				Chr2	7039100	7039200				Chr3	14198700	14198800
Chr1	15824600	15824700	Chr1	13884700	13884800	Chr3	14210900	14211000	Chr1	13397500	13397600				Chr2	7145500	7145600				Chr3	14198800	14198900
Chr1	15824700	15824800	Chr1	13885200	13885300	Chr3	14211400	14211500	Chr1	13397600	13397700				Chr2	7166900	7167000				Chr3	14198900	14199000
Chr1	15824800	15824900	Chr1	13885400	13885500	Chr3	14212400	14212500	Chr1	13400300	13400400				Chr2	7191000	7191100				Chr3	14199000	14199100
Chr1	15824900	15825000	Chr1	13885500	13885600	Chr3	14212900	14213000	Chr1	13402000	13402100				Chr2	7191100	7191200				Chr3	14199100	14199200
Chr1	15825000	15825100	Chr1	13885900	13886000	Chr3	14213200	14213300	Chr1	13407400	13407500				Chr2	7191200	7191300				Chr3	14199200	14199300
Chr1	15826200	15826300	Chr1	13886100	13886200	Chr3	14213600	14213700	Chr1	13407500	13407600				Chr2	7191300	7191400				Chr3	14199300	14199400
Chr1	15827300	15827400	Chr1	13886200	13886300	Chr3	14213900	14214000	Chr1	13407700	13407800				Chr2	7191400	7191500				Chr3	14199400	14199500
Chr1	15830700	15830800	Chr1	13886300	13886400	Chr3	14214400	14214500	Chr1	13407800	13407900				Chr2	7191500	7191600				Chr3	14199500	14199600
Chr1	15831500	15831600	Chr1	13886400	13886500	Chr3	14214700	14214800	Chr1	13407900	13408000				Chr2	7524400	7524500				Chr3	14199700	14199800
Chr1	15831600	15831700	Chr1	13887300	13887400	Chr3	14214900	14215000	Chr1	13408500	13408600				Chr2	7524500	7524600				Chr3	14199800	14199900
Chr1	15832700	15832800	Chr1	13887600	13887700	Chr3	14215400	14215500	Chr1	13433400	13433500				Chr2	7742700	7742800				Chr3	14199900	14200000
Chr1	15832800	15832900	Chr1	13888000	13888100	Chr3	14216200	14216300	Chr1	13445300	13445400				Chr2	7839900	7840000				Chr3	14200000	14200100
Chr1	15832900	15833000	Chr1	13888500	13888600	Chr3	14217700	14217800	Chr1	13486400	13486500				Chr2	7856800	7856900				Chr3	14200100	14200200
Chr1	15833000	15833100	Chr1	13888900	13889000	Chr3	14219100	14219200	Chr1	13486500	13486600				Chr2	7898600	7898700				Chr3	14200200	14200300
Chr1	15834200	15834300	Chr1	13889300	13889400	Chr3	14219400	14219500	Chr1	13486900	13487000				Chr2	7955700	7955800				Chr3	14200300	14200400
Chr1	15834500	15834600	Chr1	13889900	13890000	Chr3	14219900	14220000	Chr1	13487000	13487100				Chr2	7960600	7960700				Chr3	14200400	14200500
Chr1	15834800	15834900	Chr1	13890000	13890100	Chr3	14220600	14220700	Chr1	13487100	13487200				Chr2	8199800	8199900				Chr3	14200500	14200600
Chr1	15836800	15836900	Chr1	13890100	13890200	Chr3	14220700	14220800	Chr1	13487200	13487300				Chr2	8802000	8802100				Chr3	14200600	14200700
Chr1	15836900	15837000	Chr1	13890300	13890400	Chr3	14221400	14221500	Chr1	13487400	13487500				Chr2	8802100	8802200				Chr3	14200700	14200800
Chr1	15837000	15837100	Chr1	13890400	13890500	Chr3	14221500	14221600	Chr1	13487900	13488000				Chr2	8802200	8802300				Chr3	14200800	14200900
Chr1	15837100	15837200	Chr1	13890500	13890600	Chr3	14221600	14221700	Chr1	13488000	13488100				Chr2	8804500	8804600				Chr3	14200900	14201000
Chr1	15837200	15837300	Chr1	13890600	13890700	Chr3	14221900	14222000	Chr1	13489400	13489500				Chr2	8931500	8931600				Chr3	14201000	14201100
Chr1	15837600	15837700	Chr1	13890700	13890800	Chr3	14222000	14222100	Chr1	13490300	13490400				Chr2	8931700	8931800				Chr3	14201100	14201200
Chr1	15837700	15837800	Chr1	13890800	13890900	Chr3	14222700	14222800	Chr1	13495500	13495600				Chr2	8931800	8931900				Chr3	14201200	14201300
Chr1	15838400	15838500	Chr1	13896300	13896400	Chr3	14223500	14223600	Chr1	13495900	13496000				Chr2	8931900	8932000				Chr3	14201300	14201400
Chr1	15839500	15839600	Chr1	13902400	13902500	Chr3	14224000	14224100	Chr1	13508000	13508100				Chr2	8963200	8963300				Chr3	14201400	14201500
Chr1	15842900	15843000	Chr1	13902700	13902800	Chr3	14224200	14224300	Chr1	13508100	13508200				Chr2	8963300	8963400				Chr3	14201500	14201600
Chr1	15843700	15843800	Chr1	13904800	13904900	Chr3	14224500	14224600	Chr1	13508200	13508300				Chr2	8963400	8963500				Chr3	14201600	14201700
Chr1	15844900	15845000	Chr1	13904900	13905000	Chr3	14225000	14225100	Chr1	13510500	13510600				Chr2	8982300	8982400				Chr3	14201700	14201800
Chr1	15845000	15845100	Chr1	13905900	13906000	Chr3	14272700	14272800	Chr1	13510600	13510700				Chr2	9058200	9058300				Chr3	14201800	14201900
Chr1	15845100	15845200	Chr1	13906000	13906100	Chr3	14423900	14424000	Chr1	13512100	13512200				Chr2	9058900	9059000				Chr3	14201900	14202000
Chr1	15845200	15845300	Chr1	13906200	13906300	Chr3	14461400	14461500	Chr1	13514600	13514700				Chr2	9059200	9059300				Chr3	14202000	14202100
Chr1	15845300	15845400	Chr1	13906300	13906400	Chr3	14841100	14841200	Chr1	13514900	13515000				Chr2	9137300	9137400				Chr3	14202100	14202200
Chr1	15847000	15847100	Chr1	13907800	13907900	Chr3	14841200	14841300	Chr1	13515200	13515300				Chr2	9137400	9137500				Chr3	14202200	14202300
Chr1	15847100	15847200	Chr1	13907900	13908000	Chr3	14859600	14859700	Chr1	13515900	13516000				Chr2	9234100	9234200				Chr3	14202300	14202400
Chr1	15940300	15940400	Chr1	13915900	13916000	Chr3	15167600	15167700	Chr1	13516400	13516500				Chr2	9234200	9234300				Chr3	14202400	14202500
Chr1	15940400	15940500	Chr1	13917700	13917800	Chr3	15269600	15269700	Chr1	13544700	13544800				Chr2	9262800	9262900				Chr3	14202500	14202600
Chr1	15944400	15944500	Chr1	13920700	13920800	Chr3	15302900	15303000	Chr1	13565500	13565600				Chr2	9265600	9265700				Chr3	14202600	14202700
Chr1	15944600	15944700	Chr1	13920800	13920900	Chr3	15304100	15304200	Chr1	13572400	13572500				Chr2	9265700	9265800				Chr3	14202700	14202800
Chr1	15944700	15944800	Chr1	13920900	13921000	Chr3	15318700	15318800	Chr1	13584900	13585000				Chr2	9265800	9265900				Chr3	14202800	14202900
Chr1	15964200	15964300	Chr1	13921100	13921200	Chr3	15318800	15318900	Chr1	13598500	13598600				Chr2	9266200	9266300				Chr3	14202900	14203000
Chr1	16004700	16004800	Chr1	13921200	13921300	Chr3	15320000	15320100	Chr1	13599600	13599700				Chr2	9266300	9266400				Chr3	14203000	14203100
Chr1	16012700	16012800	Chr1	13921500	13921600	Chr3	15453500	15453600	Chr1	13621500	13621600				Chr2	9266800	9266900				Chr3	14203100	14203200
Chr1	16012800	16012900	Chr1	13922000	13922100	Chr3	15468800	15468900	Chr1	13621600	13621700				Chr2	9270600	9270700				Chr3	14203200	14203300
Chr1	16013000	16013100	Chr1	13926100	13926200	Chr3	15477300	15477400	Chr1	13622000	13622100				Chr2	9270700	9270800				Chr3	14203300	14203400
Chr1	16013600	16013700	Chr1	13926200	13926300	Chr3	15477400	15477500	Chr1	13624000	13624100				Chr2	9329400	9329500				Chr3	14203400	14203500
Chr1	16013700	16013800	Chr1	13926400	13926500	Chr3	15507900	15508000	Chr1	13639200	13639300				Chr2	9329500	9329600				Chr3	14207800	14207900
Chr1	16013800	16013900	Chr1	13926500	13926600	Chr3	15633600	15633700	Chr1	13640100	13640200				Chr2	9393600	9393700				Chr3	14210100	14210200
Chr1	16014000	16014100	Chr1	13926900	13927000	Chr3	15633700	15633800	Chr1	13652600	13652700				Chr2	9393700	9393800				Chr3	14213200	14213300
Chr1	16014600	16014700	Chr1	13927000	13927100	Chr3	15638800	15638900	Chr1	13652700	13652800				Chr2	9449800	9449900				Chr3	14216200	14216300
Chr1	16015100	16015200	Chr1	13927100	13927200	Chr3	15653100	15653200	Chr1	13659300	13659400				Chr2	9465500	9465600				Chr3	14218200	14218300
Chr1	16015200	16015300	Chr1	13927900	13928000	Chr3	15677700	15677800	Chr1	13659400	13659500				Chr2	9465600	9465700				Chr3	14220700	14220800
Chr1	16016000	16016100	Chr1	13931800	13931900	Chr3	15677800	15677900	Chr1	13659500	13659600				Chr2	9502200	9502300				Chr3	14221200	14221300
Chr1	16016400	16016500	Chr1	13931900	13932000	Chr3	15677900	15678000	Chr1	13659600	13659700				Chr2	9502300	9502400				Chr3	14222700	14222800
Chr1	16016600	16016700	Chr1	13932000	13932100	Chr3	15715200	15715300	Chr1	13659800	13659900				Chr2	9560300	9560400				Chr3	14223200	14223300
Chr1	16017000	16017100	Chr1	13932200	13932300	Chr3	15784600	15784700	Chr1	13659900	13660000				Chr2	9560400	9560500				Chr3	14397300	14397400
Chr1	16017300	16017400	Chr1	13932300	13932400	Chr3	15814300	15814400	Chr1	13660000	13660100				Chr2	9560500	9560600				Chr3	14841100	14841200
Chr1	16017400	16017500	Chr1	13932500	13932600	Chr3	15874100	15874200	Chr1	13660100	13660200				Chr2	9560600	9560700				Chr3	14841200	14841300
Chr1	16017600	16017700	Chr1	13932900	13933000	Chr3	15931300	15931400	Chr1	13660200	13660300				Chr2	9560800	9560900				Chr3	16151300	16151400
Chr1	16017700	16017800	Chr1	13933000	13933100	Chr3	16143500	16143600	Chr1	13660500	13660600				Chr2	9591000	9591100				Chr3	16158400	16158500
Chr1	16017800	16017900	Chr1	13933100	13933200	Chr3	16144000	16144100	Chr1	13660600	13660700				Chr2	9803200	9803300				Chr3	16158500	16158600
Chr1	16017900	16018000	Chr1	13933200	13933300	Chr3	16144100	16144200	Chr1	13662400	13662500				Chr2	9920100	9920200				Chr3	16158700	16158800
Chr1	16018000	16018100	Chr1	13933900	13934000	Chr3	16159200	16159300	Chr1	13662500	13662600				Chr2	9942200	9942300				Chr3	16158900	16159000
Chr1	16018100	16018200	Chr1	13934000	13934100	Chr3	16159500	16159600	Chr1	13662800	13662900				Chr2	9986500	9986600				Chr3	16159000	16159100
Chr1	16018200	16018300	Chr1	13937900	13938000	Chr3	16159700	16159800	Chr1	13662900	13663000				Chr2	10026900	10027000				Chr3	16159100	16159200
Chr1	16018300	16018400	Chr1	13938000	13938100	Chr3	16159800	16159900	Chr1	13663000	13663100				Chr2	10027000	10027100				Chr3	16159200	16159300
Chr1	16018400	16018500	Chr1	13938100	13938200	Chr3	16160000	16160100	Chr1	13664600	13664700				Chr2	10059400	10059500				Chr3	16159300	16159400
Chr1	16018500	16018600	Chr1	13938300	13938400	Chr3	16160100	16160200	Chr1	13664700	13664800				Chr2	10059500	10059600				Chr3	16159400	16159500
Chr1	16018600	16018700	Chr1	13940700	13940800	Chr3	16160200	16160300	Chr1	13666400	13666500				Chr2	10355900	10356000				Chr3	16159500	16159600
Chr1	16018800	16018900	Chr1	13941500	13941600	Chr3	16160300	16160400	Chr1	13666600	13666700				Chr2	10356300	10356400				Chr3	16159600	16159700
Chr1	16019400	16019500	Chr1	13942800	13942900	Chr3	16160400	16160500	Chr1	13666700	13666800				Chr2	10356400	10356500				Chr3	16159700	16159800
Chr1	16019500	16019600	Chr1	13946800	13946900	Chr3	16160600	16160700	Chr1	13667200	13667300				Chr2	10356600	10356700				Chr3	16159800	16159900
Chr1	16092600	16092700	Chr1	13951300	13951400	Chr3	16161700	16161800	Chr1	13667300	13667400				Chr2	10357700	10357800				Chr3	16159900	16160000
Chr1	16092700	16092800	Chr1	13972000	13972100	Chr3	16212800	16212900	Chr1	13675500	13675600				Chr2	10358000	10358100				Chr3	16160000	16160100
Chr1	16095200	16095300	Chr1	13972200	13972300	Chr3	16213300	16213400	Chr1	13675600	13675700				Chr2	10358100	10358200				Chr3	16160100	16160200
Chr1	16095300	16095400	Chr1	13972300	13972400	Chr3	16334600	16334700	Chr1	13682700	13682800				Chr2	10373500	10373600				Chr3	16160200	16160300
Chr1	16104200	16104300	Chr1	13973900	13974000	Chr3	16334700	16334800	Chr1	13704900	13705000				Chr2	10373600	10373700				Chr3	16160300	16160400
Chr1	16104300	16104400	Chr1	13979400	13979500	Chr3	16336100	16336200	Chr1	13705900	13706000				Chr2	10408600	10408700				Chr3	16160400	16160500
Chr1	16143200	16143300	Chr1	13979500	13979600	Chr3	16336200	16336300	Chr1	13706400	13706500				Chr2	10408700	10408800				Chr3	16160500	16160600
Chr1	16162100	16162200	Chr1	13979600	13979700	Chr3	16336300	16336400	Chr1	13711500	13711600				Chr2	10408800	10408900				Chr3	16160600	16160700
Chr1	16162300	16162400	Chr1	14011900	14012000	Chr3	16341800	16341900	Chr1	13728000	13728100				Chr2	10408900	10409000				Chr3	16160700	16160800
Chr1	16166700	16166800	Chr1	14012000	14012100	Chr3	16354300	16354400	Chr1	13739100	13739200				Chr2	10409000	10409100				Chr3	16160800	16160900
Chr1	16166800	16166900	Chr1	14013300	14013400	Chr3	16354400	16354500	Chr1	13740300	13740400				Chr2	10409400	10409500				Chr3	16160900	16161000
Chr1	16202000	16202100	Chr1	14030800	14030900	Chr3	16405600	16405700	Chr1	13740400	13740500				Chr2	10470200	10470300				Chr3	16161100	16161200
Chr1	16202100	16202200	Chr1	14030900	14031000	Chr3	16420100	16420200	Chr1	13773700	13773800				Chr2	10470300	10470400				Chr3	16161200	16161300
Chr1	16212200	16212300	Chr1	14032200	14032300	Chr3	16451700	16451800	Chr1	13777100	13777200				Chr2	10676400	10676500				Chr3	16161300	16161400
Chr1	16212300	16212400	Chr1	14033000	14033100	Chr3	16534500	16534600	Chr1	13777300	13777400				Chr2	10676500	10676600				Chr3	16161400	16161500
Chr1	16247800	16247900	Chr1	14033100	14033200	Chr3	16672700	16672800	Chr1	13777500	13777600				Chr2	10718000	10718100				Chr3	16427000	16427100
Chr1	16252700	16252800	Chr1	14045300	14045400	Chr3	16672800	16672900	Chr1	13781000	13781100				Chr2	10718100	10718200				Chr3	16427100	16427200
Chr1	16252800	16252900	Chr1	14059300	14059400	Chr3	16678300	16678400	Chr1	13781100	13781200				Chr2	11115600	11115700				Chr3	16885800	16885900
Chr1	16258700	16258800	Chr1	14059500	14059600	Chr3	16682600	16682700	Chr1	13785300	13785400				Chr2	11115700	11115800				Chr3	16885900	16886000
Chr1	16259700	16259800	Chr1	14059900	14060000	Chr3	16723200	16723300	Chr1	13785400	13785500				Chr2	11138300	11138400				Chr3	16891600	16891700
Chr1	16274100	16274200	Chr1	14060000	14060100	Chr3	16787600	16787700	Chr1	13786800	13786900				Chr2	11266300	11266400				Chr3	16894100	16894200
Chr1	16274200	16274300	Chr1	14060300	14060400	Chr3	16885900	16886000	Chr1	13787300	13787400				Chr2	11721600	11721700				Chr3	16894200	16894300
Chr1	16274300	16274400	Chr1	14083000	14083100	Chr3	16894100	16894200	Chr1	13787600	13787700				Chr2	11721700	11721800				Chr3	17019600	17019700
Chr1	16274400	16274500	Chr1	14083400	14083500	Chr3	16894200	16894300	Chr1	13787800	13787900				Chr2	11721800	11721900				Chr3	17149700	17149800
Chr1	16274600	16274700	Chr1	14083500	14083600	Chr3	16903000	16903100	Chr1	13788000	13788100				Chr2	11721900	11722000				Chr3	17278100	17278200
Chr1	16283400	16283500	Chr1	14083800	14083900	Chr3	17033300	17033400	Chr1	13788100	13788200				Chr2	11722000	11722100				Chr3	17445400	17445500
Chr1	16286600	16286700	Chr1	14090500	14090600	Chr3	17033400	17033500	Chr1	13788700	13788800				Chr2	11758900	11759000				Chr3	17445500	17445600
Chr1	16286900	16287000	Chr1	14090800	14090900	Chr3	17062100	17062200	Chr1	13788800	13788900				Chr2	11759000	11759100				Chr3	17445600	17445700
Chr1	16294300	16294400	Chr1	14091300	14091400	Chr3	17070100	17070200	Chr1	13794000	13794100				Chr2	11768800	11768900				Chr3	17445800	17445900
Chr1	16294400	16294500	Chr1	14091800	14091900	Chr3	17070200	17070300	Chr1	13794300	13794400				Chr2	11774800	11774900				Chr3	17445900	17446000
Chr1	16298800	16298900	Chr1	14092700	14092800	Chr3	17070700	17070800	Chr1	13794700	13794800				Chr2	11774900	11775000				Chr3	17493400	17493500
Chr1	16298900	16299000	Chr1	14093100	14093200	Chr3	17143200	17143300	Chr1	13796600	13796700				Chr2	11864100	11864200				Chr3	17493500	17493600
Chr1	16305300	16305400	Chr1	14093200	14093300	Chr3	17178400	17178500	Chr1	13796700	13796800				Chr2	11864200	11864300				Chr3	17493600	17493700
Chr1	16305400	16305500	Chr1	14093900	14094000	Chr3	17178500	17178600	Chr1	13797400	13797500				Chr2	11942900	11943000				Chr3	17493900	17494000
Chr1	16326500	16326600	Chr1	14099700	14099800	Chr3	17202800	17202900	Chr1	13797500	13797600				Chr2	12270100	12270200				Chr3	17494000	17494100
Chr1	16327400	16327500	Chr1	14099800	14099900	Chr3	17300000	17300100	Chr1	13797700	13797800				Chr2	12270200	12270300				Chr3	17494200	17494300
Chr1	16327500	16327600	Chr1	14164400	14164500	Chr3	17363100	17363200	Chr1	13798600	13798700				Chr2	12329000	12329100				Chr3	17494300	17494400
Chr1	16328100	16328200	Chr1	14165900	14166000	Chr3	17363200	17363300	Chr1	13798900	13799000				Chr2	12333000	12333100				Chr3	17494600	17494700
Chr1	16328200	16328300	Chr1	14169500	14169600	Chr3	17368100	17368200	Chr1	13811000	13811100				Chr2	12333100	12333200				Chr3	17838100	17838200
Chr1	16328300	16328400	Chr1	14178200	14178300	Chr3	17377300	17377400	Chr1	13812400	13812500				Chr2	12335000	12335100				Chr3	17894400	17894500
Chr1	16342800	16342900	Chr1	14178300	14178400	Chr3	17432900	17433000	Chr1	13812700	13812800				Chr2	12339700	12339800				Chr3	17974500	17974600
Chr1	16342900	16343000	Chr1	14178500	14178600	Chr3	17658700	17658800	Chr1	13828600	13828700				Chr2	12339800	12339900				Chr3	17974600	17974700
Chr1	16350500	16350600	Chr1	14179200	14179300	Chr3	18070000	18070100	Chr1	13828700	13828800				Chr2	12471700	12471800				Chr3	18069100	18069200
Chr1	16351000	16351100	Chr1	14179300	14179400	Chr3	18171000	18171100	Chr1	13829400	13829500				Chr2	12471800	12471900				Chr3	18343600	18343700
Chr1	16351100	16351200	Chr1	14179500	14179600	Chr3	18172300	18172400	Chr1	13830700	13830800				Chr2	12638100	12638200				Chr3	18507800	18507900
Chr1	16351200	16351300	Chr1	14180000	14180100	Chr3	18172400	18172500	Chr1	13831600	13831700				Chr2	12638200	12638300				Chr3	18744800	18744900
Chr1	16352100	16352200	Chr1	14180100	14180200	Chr3	18243800	18243900	Chr1	13836300	13836400				Chr2	12767100	12767200				Chr3	18810700	18810800
Chr1	16352200	16352300	Chr1	14181100	14181200	Chr3	18507800	18507900	Chr1	13837900	13838000				Chr2	12767200	12767300				Chr3	18810800	18810900
Chr1	16352300	16352400	Chr1	14181200	14181300	Chr3	18631600	18631700	Chr1	13851200	13851300				Chr2	12881500	12881600				Chr3	18826000	18826100
Chr1	16353700	16353800	Chr1	14181400	14181500	Chr3	18631700	18631800	Chr1	13854400	13854500				Chr2	12881600	12881700				Chr3	18826100	18826200
Chr1	16353800	16353900	Chr1	14182200	14182300	Chr3	18631800	18631900	Chr1	13854500	13854600				Chr2	12881700	12881800				Chr3	18893300	18893400
Chr1	16353900	16354000	Chr1	14182300	14182400	Chr3	18634000	18634100	Chr1	13863300	13863400				Chr2	12882700	12882800				Chr3	18917400	18917500
Chr1	16354000	16354100	Chr1	14188000	14188100	Chr3	18653000	18653100	Chr1	13863500	13863600				Chr2	12882800	12882900				Chr3	18997600	18997700
Chr1	16354100	16354200	Chr1	14188300	14188400	Chr3	18873700	18873800	Chr1	13863700	13863800				Chr2	12975800	12975900				Chr3	18997700	18997800
Chr1	16354800	16354900	Chr1	14191500	14191600	Chr3	19134300	19134400	Chr1	13863800	13863900				Chr2	12975900	12976000				Chr3	19212600	19212700
Chr1	16355000	16355100	Chr1	14192200	14192300	Chr3	19178400	19178500	Chr1	13864500	13864600				Chr2	12976000	12976100				Chr3	19392700	19392800
Chr1	16355100	16355200	Chr1	14192300	14192400	Chr3	19178900	19179000	Chr1	13864600	13864700				Chr2	13137200	13137300				Chr3	19501000	19501100
Chr1	16355700	16355800	Chr1	14206400	14206500	Chr3	19243600	19243700	Chr1	13869900	13870000				Chr2	13137300	13137400				Chr3	19627600	19627700
Chr1	16355800	16355900	Chr1	14207200	14207300	Chr3	19437200	19437300	Chr1	13870200	13870300				Chr2	13271800	13271900				Chr3	19627900	19628000
Chr1	16356000	16356100	Chr1	14225100	14225200	Chr3	19437300	19437400	Chr1	13870300	13870400				Chr2	13271900	13272000				Chr3	19924300	19924400
Chr1	16356100	16356200	Chr1	14225200	14225300	Chr3	19740200	19740300	Chr1	13882000	13882100				Chr2	13272000	13272100				Chr3	19984900	19985000
Chr1	16356900	16357000	Chr1	14227000	14227100	Chr3	20619500	20619600	Chr1	13882100	13882200				Chr2	13272100	13272200				Chr3	19985000	19985100
Chr1	16357100	16357200	Chr1	14227100	14227200	Chr3	20619600	20619700	Chr1	13883200	13883300				Chr2	13529800	13529900				Chr3	20067900	20068000
Chr1	16357200	16357300	Chr1	14228100	14228200	Chr3	20629800	20629900	Chr1	13883300	13883400				Chr2	14047300	14047400				Chr3	20339700	20339800
Chr1	16359600	16359700	Chr1	14228200	14228300	Chr3	20691700	20691800	Chr1	13883400	13883500				Chr2	14163900	14164000				Chr3	20339800	20339900
Chr1	16359700	16359800	Chr1	14228800	14228900	Chr3	20769700	20769800	Chr1	13883600	13883700				Chr2	14243100	14243200				Chr3	20339900	20340000
Chr1	16360300	16360400	Chr1	14240400	14240500	Chr3	20875600	20875700	Chr1	13883700	13883800				Chr2	14244600	14244700				Chr3	20340000	20340100
Chr1	16360400	16360500	Chr1	14244700	14244800	Chr3	21004500	21004600	Chr1	13883800	13883900				Chr2	14244700	14244800				Chr3	20340100	20340200
Chr1	16364100	16364200	Chr1	14244900	14245000	Chr3	21041900	21042000	Chr1	13883900	13884000				Chr2	14350300	14350400				Chr3	20340200	20340300
Chr1	16364600	16364700	Chr1	14245200	14245300	Chr3	21397500	21397600	Chr1	13884000	13884100				Chr2	14350400	14350500				Chr3	20340300	20340400
Chr1	16364700	16364800	Chr1	14246100	14246200	Chr3	21552200	21552300	Chr1	13885900	13886000				Chr2	14350800	14350900				Chr3	20340900	20341000
Chr1	16365700	16365800	Chr1	14248000	14248100	Chr3	22122800	22122900	Chr1	13886200	13886300				Chr2	14351300	14351400				Chr3	20619500	20619600
Chr1	16365800	16365900	Chr1	14248100	14248200	Chr3	22138700	22138800	Chr1	13886300	13886400				Chr2	14351400	14351500				Chr3	20619600	20619700
Chr1	16365900	16366000	Chr1	14250000	14250100	Chr3	22241500	22241600	Chr1	13886400	13886500				Chr2	14352100	14352200				Chr3	20642900	20643000
Chr1	16366100	16366200	Chr1	14252800	14252900	Chr3	22656500	22656600	Chr1	13888000	13888100				Chr2	14352200	14352300				Chr3	20693600	20693700
Chr1	16366200	16366300	Chr1	14253600	14253700	Chr3	22922200	22922300	Chr1	13888100	13888200				Chr2	14353100	14353200				Chr3	20693700	20693800
Chr1	16367900	16368000	Chr1	14254100	14254200	Chr3	22922300	22922400	Chr1	13888900	13889000				Chr2	14353200	14353300				Chr3	20725800	20725900
Chr1	16368000	16368100	Chr1	14254200	14254300	Chr3	23406100	23406200	Chr1	13889900	13890000				Chr2	14353600	14353700				Chr3	20729500	20729600
Chr1	16368600	16368700	Chr1	14255800	14255900	Chr4	369800	369900	Chr1	13890000	13890100				Chr2	14353700	14353800				Chr3	20807700	20807800
Chr1	16368700	16368800	Chr1	14256100	14256200	Chr4	371500	371600	Chr1	13890100	13890200				Chr2	14354100	14354200				Chr3	20807800	20807900
Chr1	16381700	16381800	Chr1	14256600	14256700	Chr4	698700	698800	Chr1	13890400	13890500				Chr2	14355100	14355200				Chr3	20813500	20813600
Chr1	16383600	16383700	Chr1	14256800	14256900	Chr4	698800	698900	Chr1	13890500	13890600				Chr2	14355200	14355300				Chr3	21004500	21004600
Chr1	16384300	16384400	Chr1	14256900	14257000	Chr4	764300	764400	Chr1	13890600	13890700				Chr2	14356000	14356100				Chr3	21004600	21004700
Chr1	16384400	16384500	Chr1	14260900	14261000	Chr4	815300	815400	Chr1	13890700	13890800				Chr2	14356100	14356200				Chr3	21041800	21041900
Chr1	16385000	16385100	Chr1	14261000	14261100	Chr4	823600	823700	Chr1	13890800	13890900				Chr2	14356500	14356600				Chr3	21041900	21042000
Chr1	16385100	16385200	Chr1	14261700	14261800	Chr4	983300	983400	Chr1	13896300	13896400				Chr2	14522800	14522900				Chr3	21346700	21346800
Chr1	16385200	16385300	Chr1	14261800	14261900	Chr4	1116600	1116700	Chr1	13902000	13902100				Chr2	14743400	14743500				Chr3	21346800	21346900
Chr1	16385300	16385400	Chr1	14261900	14262000	Chr4	1116700	1116800	Chr1	13904800	13904900				Chr2	14811600	14811700				Chr3	21346900	21347000
Chr1	16385400	16385500	Chr1	14264000	14264100	Chr4	1116800	1116900	Chr1	13904900	13905000				Chr2	14840600	14840700				Chr3	21385200	21385300
Chr1	16385500	16385600	Chr1	14264500	14264600	Chr4	1230600	1230700	Chr1	13905200	13905300				Chr2	14894300	14894400				Chr3	21387700	21387800
Chr1	16400900	16401000	Chr1	14268600	14268700	Chr4	1280700	1280800	Chr1	13906300	13906400				Chr2	14894400	14894500				Chr3	21387800	21387900
Chr1	16405200	16405300	Chr1	14273500	14273600	Chr4	1281200	1281300	Chr1	13907800	13907900				Chr2	14894500	14894600				Chr3	21388900	21389000
Chr1	16420900	16421000	Chr1	14282500	14282600	Chr4	1302800	1302900	Chr1	13912800	13912900				Chr2	14894600	14894700				Chr3	21397400	21397500
Chr1	16422600	16422700	Chr1	14286400	14286500	Chr4	1318900	1319000	Chr1	13915900	13916000				Chr2	14894700	14894800				Chr3	21397500	21397600
Chr1	16499400	16499500	Chr1	14298100	14298200	Chr4	1319100	1319200	Chr1	13927900	13928000				Chr2	14894800	14894900				Chr3	21397600	21397700
Chr1	16511000	16511100	Chr1	14298600	14298700	Chr4	1338000	1338100	Chr1	13934000	13934100				Chr2	15027600	15027700				Chr3	21542200	21542300
Chr1	16511700	16511800	Chr1	14298700	14298800	Chr4	1476500	1476600	Chr1	13940900	13941000				Chr2	15027700	15027800				Chr3	21542300	21542400
Chr1	16511800	16511900	Chr1	14298800	14298900	Chr4	1483000	1483100	Chr1	13941100	13941200				Chr2	15029500	15029600				Chr3	21902200	21902300
Chr1	16513300	16513400	Chr1	14299200	14299300	Chr4	1483100	1483200	Chr1	13941500	13941600				Chr2	15029700	15029800				Chr3	21959500	21959600
Chr1	16513400	16513500	Chr1	14309000	14309100	Chr4	1488400	1488500	Chr1	13946100	13946200				Chr2	15029800	15029900				Chr3	22076600	22076700
Chr1	16513500	16513600	Chr1	14315800	14315900	Chr4	1521600	1521700	Chr1	13972000	13972100				Chr2	15029900	15030000				Chr3	22122800	22122900
Chr1	16513600	16513700	Chr1	14315900	14316000	Chr4	1521700	1521800	Chr1	13973800	13973900				Chr2	15030100	15030200				Chr3	22138700	22138800
Chr1	16513800	16513900	Chr1	14316500	14316600	Chr4	1528100	1528200	Chr1	13979500	13979600				Chr2	15168800	15168900				Chr3	22138800	22138900
Chr1	16513900	16514000	Chr1	14316600	14316700	Chr4	1535400	1535500	Chr1	13996500	13996600				Chr2	15169600	15169700				Chr3	22241500	22241600
Chr1	16514200	16514300	Chr1	14316700	14316800	Chr4	1598500	1598600	Chr1	14012900	14013000				Chr2	15208300	15208400				Chr3	22454200	22454300
Chr1	16514300	16514400	Chr1	14317500	14317600	Chr4	1619000	1619100	Chr1	14013300	14013400				Chr2	15208400	15208500				Chr3	22455900	22456000
Chr1	16514400	16514500	Chr1	14317600	14317700	Chr4	1619100	1619200	Chr1	14019400	14019500				Chr2	15320200	15320300				Chr3	22456000	22456100
Chr1	16514500	16514600	Chr1	14320300	14320400	Chr4	1620500	1620600	Chr1	14024300	14024400				Chr2	15320300	15320400				Chr3	22470200	22470300
Chr1	16514600	16514700	Chr1	14320400	14320500	Chr4	1620600	1620700	Chr1	14024400	14024500				Chr2	15320400	15320500				Chr3	22537300	22537400
Chr1	16514800	16514900	Chr1	14330000	14330100	Chr4	1620700	1620800	Chr1	14024500	14024600				Chr2	15321400	15321500				Chr3	22611400	22611500
Chr1	16514900	16515000	Chr1	14334900	14335000	Chr4	1624100	1624200	Chr1	14044500	14044600				Chr2	15346100	15346200				Chr3	22656500	22656600
Chr1	16515000	16515100	Chr1	14336200	14336300	Chr4	1624200	1624300	Chr1	14044600	14044700				Chr2	15346200	15346300				Chr3	22656600	22656700
Chr1	16515100	16515200	Chr1	14336800	14336900	Chr4	1644200	1644300	Chr1	14045200	14045300				Chr2	15470100	15470200				Chr3	22745700	22745800
Chr1	16515600	16515700	Chr1	14337000	14337100	Chr4	1644300	1644400	Chr1	14045800	14045900				Chr2	15470200	15470300				Chr3	22746100	22746200
Chr1	16515700	16515800	Chr1	14337100	14337200	Chr4	1668200	1668300	Chr1	14059500	14059600				Chr2	15611800	15611900				Chr3	22746200	22746300
Chr1	16516100	16516200	Chr1	14337500	14337600	Chr4	1688700	1688800	Chr1	14059700	14059800				Chr2	15611900	15612000				Chr3	22746400	22746500
Chr1	16516300	16516400	Chr1	14337600	14337700	Chr4	1704600	1704700	Chr1	14059900	14060000				Chr2	15722200	15722300				Chr3	22746500	22746600
Chr1	16520100	16520200	Chr1	14337700	14337800	Chr4	1706500	1706600	Chr1	14060100	14060200				Chr2	15890000	15890100				Chr3	22746600	22746700
Chr1	16520700	16520800	Chr1	14338000	14338100	Chr4	1718200	1718300	Chr1	14060200	14060300				Chr2	15890100	15890200				Chr3	22746700	22746800
Chr1	16520800	16520900	Chr1	14338100	14338200	Chr4	1720100	1720200	Chr1	14077400	14077500				Chr2	15890300	15890400				Chr3	22747100	22747200
Chr1	16522300	16522400	Chr1	14338300	14338400	Chr4	1724000	1724100	Chr1	14077500	14077600				Chr2	15890400	15890500				Chr3	22775900	22776000
Chr1	16522500	16522600	Chr1	14339200	14339300	Chr4	1726000	1726100	Chr1	14082600	14082700				Chr2	15916800	15916900				Chr3	22842500	22842600
Chr1	16522600	16522700	Chr1	14339500	14339600	Chr4	1727900	1728000	Chr1	14082700	14082800				Chr2	16061900	16062000				Chr3	22860100	22860200
Chr1	16522800	16522900	Chr1	14339800	14339900	Chr4	1741400	1741500	Chr1	14082800	14082900				Chr2	16130400	16130500				Chr3	22881800	22881900
Chr1	16522900	16523000	Chr1	14340100	14340200	Chr4	1777300	1777400	Chr1	14083500	14083600				Chr2	16130500	16130600				Chr3	22922200	22922300
Chr1	16523000	16523100	Chr1	14340300	14340400	Chr4	2073200	2073300	Chr1	14083700	14083800				Chr2	16130600	16130700				Chr3	23036800	23036900
Chr1	16523100	16523200	Chr1	14340800	14340900	Chr4	2073300	2073400	Chr1	14083900	14084000				Chr2	16130900	16131000				Chr3	23036900	23037000
Chr1	16523200	16523300	Chr1	14340900	14341000	Chr4	2073600	2073700	Chr1	14084000	14084100				Chr2	16340200	16340300				Chr3	23051500	23051600
Chr1	16523300	16523400	Chr1	14341000	14341100	Chr4	2073700	2073800	Chr1	14084500	14084600				Chr2	16340300	16340400				Chr3	23136800	23136900
Chr1	16523400	16523500	Chr1	14342100	14342200	Chr4	2073800	2073900	Chr1	14084600	14084700				Chr2	16518500	16518600				Chr3	23285600	23285700
Chr1	16523500	16523600	Chr1	14342200	14342300	Chr4	2076200	2076300	Chr1	14091800	14091900				Chr2	16518600	16518700				Chr3	23285800	23285900
Chr1	16523700	16523800	Chr1	14342500	14342600	Chr4	2180300	2180400	Chr1	14092400	14092500				Chr2	16518700	16518800				Chr3	23406200	23406300
Chr1	16523900	16524000	Chr1	14345300	14345400	Chr4	2184400	2184500	Chr1	14093200	14093300				Chr2	16518800	16518900				Chr4	33800	33900
Chr1	16524000	16524100	Chr1	14346000	14346100	Chr4	2258300	2258400	Chr1	14093600	14093700				Chr2	16537400	16537500				Chr4	424700	424800
Chr1	16524100	16524200	Chr1	14347300	14347400	Chr4	2261700	2261800	Chr1	14093700	14093800				Chr2	16537500	16537600				Chr4	494600	494700
Chr1	16524200	16524300	Chr1	14349000	14349100	Chr4	2430700	2430800	Chr1	14098100	14098200				Chr2	16537600	16537700				Chr4	808300	808400
Chr1	16524700	16524800	Chr1	14355600	14355700	Chr4	2496600	2496700	Chr1	14099400	14099500				Chr2	16537700	16537800				Chr4	815200	815300
Chr1	16524800	16524900	Chr1	14356800	14356900	Chr4	2496700	2496800	Chr1	14099700	14099800				Chr2	16537800	16537900				Chr4	815300	815400
Chr1	16525200	16525300	Chr1	14362400	14362500	Chr4	2595100	2595200	Chr1	14103800	14103900				Chr2	16538000	16538100				Chr4	901100	901200
Chr1	16528500	16528600	Chr1	14363600	14363700	Chr4	2639800	2639900	Chr1	14146900	14147000				Chr2	16539500	16539600				Chr4	1046400	1046500
Chr1	16593000	16593100	Chr1	14363900	14364000	Chr4	2640000	2640100	Chr1	14153000	14153100				Chr2	16539600	16539700				Chr4	1046900	1047000
Chr1	16594400	16594500	Chr1	14364000	14364100	Chr4	2640100	2640200	Chr1	14153100	14153200				Chr2	16539700	16539800				Chr4	1122600	1122700
Chr1	16595600	16595700	Chr1	14364600	14364700	Chr4	2663900	2664000	Chr1	14155000	14155100				Chr2	16539800	16539900				Chr4	1229200	1229300
Chr1	16595700	16595800	Chr1	14366000	14366100	Chr4	2793600	2793700	Chr1	14164200	14164300				Chr2	16539900	16540000				Chr4	1229400	1229500
Chr1	16598200	16598300	Chr1	14366100	14366200	Chr4	2815600	2815700	Chr1	14164400	14164500				Chr2	16588000	16588100				Chr4	1229500	1229600
Chr1	16598300	16598400	Chr1	14379900	14380000	Chr4	2867900	2868000	Chr1	14164500	14164600				Chr2	16639700	16639800				Chr4	1279000	1279100
Chr1	16598400	16598500	Chr1	14383600	14383700	Chr4	2873400	2873500	Chr1	14165900	14166000				Chr2	16639800	16639900				Chr4	1318800	1318900
Chr1	16598500	16598600	Chr1	14384200	14384300	Chr4	2874900	2875000	Chr1	14166000	14166100				Chr2	16652100	16652200				Chr4	1318900	1319000
Chr1	16598600	16598700	Chr1	14384300	14384400	Chr4	3054300	3054400	Chr1	14169500	14169600				Chr2	16964100	16964200				Chr4	1319000	1319100
Chr1	16598700	16598800	Chr1	14385400	14385500	Chr4	3054400	3054500	Chr1	14178800	14178900				Chr2	17029800	17029900				Chr4	1319100	1319200
Chr1	16601100	16601200	Chr1	14385500	14385600	Chr4	3054500	3054600	Chr1	14179200	14179300				Chr2	17220300	17220400				Chr4	1390900	1391000
Chr1	16601200	16601300	Chr1	14385800	14385900	Chr4	3054600	3054700	Chr1	14180200	14180300				Chr2	17224500	17224600				Chr4	1440500	1440600
Chr1	16604000	16604100	Chr1	14387600	14387700	Chr4	3054700	3054800	Chr1	14180400	14180500				Chr2	17224600	17224700				Chr4	1442000	1442100
Chr1	16604100	16604200	Chr1	14393000	14393100	Chr4	3054800	3054900	Chr1	14181100	14181200				Chr2	17224700	17224800				Chr4	1445800	1445900
Chr1	16604200	16604300	Chr1	14394600	14394700	Chr4	3054900	3055000	Chr1	14181200	14181300				Chr2	17224800	17224900				Chr4	1472700	1472800
Chr1	16604300	16604400	Chr1	14401300	14401400	Chr4	3055000	3055100	Chr1	14181400	14181500				Chr2	17538600	17538700				Chr4	1472800	1472900
Chr1	16604400	16604500	Chr1	14402500	14402600	Chr4	3055100	3055200	Chr1	14192200	14192300				Chr2	17538700	17538800				Chr4	1472900	1473000
Chr1	16604500	16604600	Chr1	14408000	14408100	Chr4	3055200	3055300	Chr1	14207200	14207300				Chr2	17660700	17660800				Chr4	1473000	1473100
Chr1	16624600	16624700	Chr1	14409200	14409300	Chr4	3055300	3055400	Chr1	14215300	14215400				Chr2	17660800	17660900				Chr4	1476300	1476400
Chr1	16624700	16624800	Chr1	14409300	14409400	Chr4	3055400	3055500	Chr1	14219400	14219500				Chr2	17873600	17873700				Chr4	1476400	1476500
Chr1	16625600	16625700	Chr1	14409600	14409700	Chr4	3055500	3055600	Chr1	14221400	14221500				Chr2	17873700	17873800				Chr4	1476500	1476600
Chr1	16628600	16628700	Chr1	14410200	14410300	Chr4	3055600	3055700	Chr1	14224500	14224600				Chr2	17923100	17923200				Chr4	1483000	1483100
Chr1	16650700	16650800	Chr1	14410300	14410400	Chr4	3055700	3055800	Chr1	14224600	14224700				Chr2	17923200	17923300				Chr4	1483100	1483200
Chr1	16650800	16650900	Chr1	14410600	14410700	Chr4	3055800	3055900	Chr1	14227000	14227100				Chr2	17923300	17923400				Chr4	1501600	1501700
Chr1	16671900	16672000	Chr1	14411700	14411800	Chr4	3055900	3056000	Chr1	14227100	14227200				Chr2	17923400	17923500				Chr4	1520800	1520900
Chr1	16673700	16673800	Chr1	14425500	14425600	Chr4	3056000	3056100	Chr1	14227900	14228000				Chr2	17995600	17995700				Chr4	1520900	1521000
Chr1	16699200	16699300	Chr1	14429200	14429300	Chr4	3056100	3056200	Chr1	14232900	14233000				Chr2	18018400	18018500				Chr4	1528100	1528200
Chr1	16699300	16699400	Chr1	14429300	14429400	Chr4	3056200	3056300	Chr1	14234200	14234300				Chr2	18018500	18018600				Chr4	1528300	1528400
Chr1	16737800	16737900	Chr1	14429500	14429600	Chr4	3056300	3056400	Chr1	14234300	14234400				Chr2	18108300	18108400				Chr4	1535400	1535500
Chr1	16738400	16738500	Chr1	14429600	14429700	Chr4	3056400	3056500	Chr1	14240900	14241000				Chr2	18310000	18310100				Chr4	1872500	1872600
Chr1	16758100	16758200	Chr1	14430000	14430100	Chr4	3056500	3056600	Chr1	14245100	14245200				Chr2	18569900	18570000				Chr4	1872600	1872700
Chr1	16758200	16758300	Chr1	14430100	14430200	Chr4	3056700	3056800	Chr1	14245300	14245400				Chr2	18703600	18703700				Chr4	1873400	1873500
Chr1	16758300	16758400	Chr1	14430200	14430300	Chr4	3056800	3056900	Chr1	14245800	14245900				Chr2	18703700	18703800				Chr4	1873500	1873600
Chr1	16758400	16758500	Chr1	14430300	14430400	Chr4	3056900	3057000	Chr1	14247400	14247500				Chr2	18902500	18902600				Chr4	2178900	2179000
Chr1	16758500	16758600	Chr1	14432900	14433000	Chr4	3057000	3057100	Chr1	14247800	14247900				Chr2	18902600	18902700				Chr4	2179000	2179100
Chr1	16791400	16791500	Chr1	14433000	14433100	Chr4	3057100	3057200	Chr1	14247900	14248000				Chr2	18902900	18903000				Chr4	2179100	2179200
Chr1	16791500	16791600	Chr1	14433600	14433700	Chr4	3057200	3057300	Chr1	14248100	14248200				Chr2	18956600	18956700				Chr4	2184000	2184100
Chr1	16791600	16791700	Chr1	14433900	14434000	Chr4	3057300	3057400	Chr1	14253400	14253500				Chr2	18956700	18956800				Chr4	2184200	2184300
Chr1	16801800	16801900	Chr1	14435100	14435200	Chr4	3057400	3057500	Chr1	14255500	14255600				Chr2	18973400	18973500				Chr4	2184300	2184400
Chr1	16801900	16802000	Chr1	14435200	14435300	Chr4	3057500	3057600	Chr1	14256100	14256200				Chr2	18973500	18973600				Chr4	2184400	2184500
Chr1	16818500	16818600	Chr1	14436100	14436200	Chr4	3057600	3057700	Chr1	14256800	14256900				Chr2	18973600	18973700				Chr4	2184500	2184600
Chr1	16818600	16818700	Chr1	14437700	14437800	Chr4	3057700	3057800	Chr1	14261900	14262000				Chr2	18973700	18973800				Chr4	2185600	2185700
Chr1	16818900	16819000	Chr1	14437900	14438000	Chr4	3057800	3057900	Chr1	14273100	14273200				Chr2	18973800	18973900				Chr4	2350700	2350800
Chr1	16825600	16825700	Chr1	14438000	14438100	Chr4	3057900	3058000	Chr1	14273500	14273600				Chr2	18973900	18974000				Chr4	2350800	2350900
Chr1	16861100	16861200	Chr1	14438500	14438600	Chr4	3058000	3058100	Chr1	14282500	14282600				Chr2	18974300	18974400				Chr4	2351100	2351200
Chr1	16861200	16861300	Chr1	14438600	14438700	Chr4	3058100	3058200	Chr1	14282600	14282700				Chr2	18994800	18994900				Chr4	2588300	2588400
Chr1	16861300	16861400	Chr1	14439500	14439600	Chr4	3058200	3058300	Chr1	14286500	14286600				Chr2	19176100	19176200				Chr4	2625900	2626000
Chr1	16870800	16870900	Chr1	14439600	14439700	Chr4	3058300	3058400	Chr1	14286600	14286700				Chr2	19176200	19176300				Chr4	2673000	2673100
Chr1	16877800	16877900	Chr1	14439800	14439900	Chr4	3058400	3058500	Chr1	14296400	14296500				Chr2	19344400	19344500				Chr4	2718900	2719000
Chr1	16880100	16880200	Chr1	14440700	14440800	Chr4	3058500	3058600	Chr1	14297600	14297700				Chr2	19367700	19367800				Chr4	2719000	2719100
Chr1	16884100	16884200	Chr1	14442500	14442600	Chr4	3058600	3058700	Chr1	14297700	14297800				Chr2	19367800	19367900				Chr4	2719100	2719200
Chr1	16884200	16884300	Chr1	14449200	14449300	Chr4	3058700	3058800	Chr1	14298600	14298700				Chr2	19415100	19415200				Chr4	2719300	2719400
Chr1	16884300	16884400	Chr1	14449300	14449400	Chr4	3058800	3058900	Chr1	14299200	14299300				Chr2	19559800	19559900				Chr4	2719400	2719500
Chr1	16884400	16884500	Chr1	14450100	14450200	Chr4	3058900	3059000	Chr1	14309000	14309100				Chr2	19559900	19560000				Chr4	2719600	2719700
Chr1	16885100	16885200	Chr1	14450200	14450300	Chr4	3059000	3059100	Chr1	14315800	14315900				Chr3	104600	104700				Chr4	2719700	2719800
Chr1	16885800	16885900	Chr1	14450400	14450500	Chr4	3059100	3059200	Chr1	14315900	14316000				Chr3	104700	104800				Chr4	2719800	2719900
Chr1	16904700	16904800	Chr1	14450700	14450800	Chr4	3059200	3059300	Chr1	14316000	14316100				Chr3	104800	104900				Chr4	2915900	2916000
Chr1	16905000	16905100	Chr1	14450800	14450900	Chr4	3059300	3059400	Chr1	14316100	14316200				Chr3	104900	105000				Chr4	2916000	2916100
Chr1	16905100	16905200	Chr1	14450900	14451000	Chr4	3059400	3059500	Chr1	14316500	14316600				Chr3	105000	105100				Chr4	3055700	3055800
Chr1	16967600	16967700	Chr1	14451200	14451300	Chr4	3059500	3059600	Chr1	14338100	14338200				Chr3	259600	259700				Chr4	3057200	3057300
Chr1	16968100	16968200	Chr1	14452400	14452500	Chr4	3059600	3059700	Chr1	14338900	14339000				Chr3	259700	259800				Chr4	3057700	3057800
Chr1	16985300	16985400	Chr1	14454500	14454600	Chr4	3059700	3059800	Chr1	14340100	14340200				Chr3	469600	469700				Chr4	3058200	3058300
Chr1	16987800	16987900	Chr1	14458500	14458600	Chr4	3059800	3059900	Chr1	14340300	14340400				Chr3	469700	469800				Chr4	5268100	5268200
Chr1	16997900	16998000	Chr1	14459800	14459900	Chr4	3059900	3060000	Chr1	14340400	14340500				Chr3	476800	476900				Chr4	5268200	5268300
Chr1	16998000	16998100	Chr1	14459900	14460000	Chr4	3060000	3060100	Chr1	14340500	14340600				Chr3	509100	509200				Chr4	6408100	6408200
Chr1	17071600	17071700	Chr1	14461500	14461600	Chr4	3060100	3060200	Chr1	14340800	14340900				Chr3	586000	586100				Chr4	6408200	6408300
Chr1	17077000	17077100	Chr1	14466400	14466500	Chr4	3060200	3060300	Chr1	14340900	14341000				Chr3	586100	586200				Chr4	6408300	6408400
Chr1	17083000	17083100	Chr1	14472900	14473000	Chr4	3060300	3060400	Chr1	14342100	14342200				Chr3	616600	616700				Chr4	6408600	6408700
Chr1	17102300	17102400	Chr1	14474100	14474200	Chr4	3060400	3060500	Chr1	14342200	14342300				Chr3	616800	616900				Chr4	6408800	6408900
Chr1	17111800	17111900	Chr1	14474300	14474400	Chr4	3060500	3060600	Chr1	14342500	14342600				Chr3	981900	982000				Chr4	6409000	6409100
Chr1	17111900	17112000	Chr1	14474500	14474600	Chr4	3060600	3060700	Chr1	14345200	14345300				Chr3	984000	984100				Chr4	6409100	6409200
Chr1	17112000	17112100	Chr1	14475100	14475200	Chr4	3060700	3060800	Chr1	14345300	14345400				Chr3	984100	984200				Chr4	6409200	6409300
Chr1	17112100	17112200	Chr1	14476500	14476600	Chr4	3060800	3060900	Chr1	14347300	14347400				Chr3	1167600	1167700				Chr4	6409300	6409400
Chr1	17112200	17112300	Chr1	14484800	14484900	Chr4	3060900	3061000	Chr1	14356100	14356200				Chr3	1601300	1601400				Chr4	6409400	6409500
Chr1	17112300	17112400	Chr1	14488000	14488100	Chr4	3061000	3061100	Chr1	14360900	14361000				Chr3	1601400	1601500				Chr4	6409500	6409600
Chr1	17112400	17112500	Chr1	14488100	14488200	Chr4	3061100	3061200	Chr1	14364700	14364800				Chr3	1657700	1657800				Chr4	6787000	6787100
Chr1	17113600	17113700	Chr1	14488400	14488500	Chr4	3061200	3061300	Chr1	14384100	14384200				Chr3	1657800	1657900				Chr4	6787100	6787200
Chr1	17114700	17114800	Chr1	14488600	14488700	Chr4	3061400	3061500	Chr1	14384200	14384300				Chr3	1657900	1658000				Chr4	6812900	6813000
Chr1	17114800	17114900	Chr1	14489000	14489100	Chr4	3282000	3282100	Chr1	14385500	14385600				Chr3	1681800	1681900				Chr4	6819200	6819300
Chr1	17151800	17151900	Chr1	14489300	14489400	Chr4	3360200	3360300	Chr1	14385800	14385900				Chr3	1681900	1682000				Chr4	6819300	6819400
Chr1	17156600	17156700	Chr1	14489400	14489500	Chr4	3510500	3510600	Chr1	14390900	14391000				Chr3	1707700	1707800				Chr4	6905500	6905600
Chr1	17158500	17158600	Chr1	14489600	14489700	Chr4	3732700	3732800	Chr1	14393000	14393100				Chr3	1707800	1707900				Chr4	6944700	6944800
Chr1	17159000	17159100	Chr1	14490700	14490800	Chr4	3950500	3950600	Chr1	14401800	14401900				Chr3	1715700	1715800				Chr4	7185700	7185800
Chr1	17160500	17160600	Chr1	14491000	14491100	Chr4	3950600	3950700	Chr1	14410300	14410400				Chr3	1843300	1843400				Chr4	7232800	7232900
Chr1	17161000	17161100	Chr1	14491200	14491300	Chr4	3950700	3950800	Chr1	14429800	14429900				Chr3	1920000	1920100				Chr4	7256400	7256500
Chr1	17162000	17162100	Chr1	14491300	14491400	Chr4	3950800	3950900	Chr1	14429900	14430000				Chr3	1959400	1959500				Chr4	7521400	7521500
Chr1	17188000	17188100	Chr1	14492300	14492400	Chr4	3950900	3951000	Chr1	14430000	14430100				Chr3	1959500	1959600				Chr4	7521600	7521700
Chr1	17203700	17203800	Chr1	14492800	14492900	Chr4	3951900	3952000	Chr1	14430100	14430200				Chr3	1959700	1959800				Chr4	7522000	7522100
Chr1	17203800	17203900	Chr1	14493200	14493300	Chr4	3952100	3952200	Chr1	14432900	14433000				Chr3	1960800	1960900				Chr4	7522300	7522400
Chr1	17229200	17229300	Chr1	14493500	14493600	Chr4	3952200	3952300	Chr1	14433000	14433100				Chr3	1960900	1961000				Chr4	7522400	7522500
Chr1	17369700	17369800	Chr1	14493700	14493800	Chr4	3952300	3952400	Chr1	14433100	14433200				Chr3	1963700	1963800				Chr4	7683800	7683900
Chr1	17381900	17382000	Chr1	14494500	14494600	Chr4	3952400	3952500	Chr1	14433200	14433300				Chr3	1963800	1963900				Chr4	7731000	7731100
Chr1	17382000	17382100	Chr1	14494800	14494900	Chr4	3952700	3952800	Chr1	14433600	14433700				Chr3	1963900	1964000				Chr4	7814200	7814300
Chr1	17405600	17405700	Chr1	14495500	14495600	Chr4	3952900	3953000	Chr1	14442100	14442200				Chr3	1964000	1964100				Chr4	7844500	7844600
Chr1	17406100	17406200	Chr1	14495700	14495800	Chr4	3953000	3953100	Chr1	14442500	14442600				Chr3	1964100	1964200				Chr4	7844600	7844700
Chr1	17502600	17502700	Chr1	14496000	14496100	Chr4	3953100	3953200	Chr1	14450400	14450500				Chr3	1964200	1964300				Chr4	7845600	7845700
Chr1	17511200	17511300	Chr1	14496100	14496200	Chr4	3953400	3953500	Chr1	14450600	14450700				Chr3	1964300	1964400				Chr4	7845700	7845800
Chr1	17540900	17541000	Chr1	14496200	14496300	Chr4	3953500	3953600	Chr1	14450700	14450800				Chr3	1964400	1964500				Chr4	7846600	7846700
Chr1	17544200	17544300	Chr1	14496700	14496800	Chr4	3954000	3954100	Chr1	14450800	14450900				Chr3	1964500	1964600				Chr4	7846700	7846800
Chr1	17547300	17547400	Chr1	14497000	14497100	Chr4	3954300	3954400	Chr1	14451000	14451100				Chr3	1964600	1964700				Chr4	7846800	7846900
Chr1	17547400	17547500	Chr1	14497900	14498000	Chr4	3954400	3954500	Chr1	14451100	14451200				Chr3	1964700	1964800				Chr4	7882400	7882500
Chr1	17547500	17547600	Chr1	14498000	14498100	Chr4	3954500	3954600	Chr1	14452400	14452500				Chr3	1964800	1964900				Chr4	7882700	7882800
Chr1	17547600	17547700	Chr1	14498100	14498200	Chr4	3954600	3954700	Chr1	14457800	14457900				Chr3	1964900	1965000				Chr4	7882800	7882900
Chr1	17551500	17551600	Chr1	14498200	14498300	Chr4	3954900	3955000	Chr1	14459800	14459900				Chr3	1965000	1965100				Chr4	7882900	7883000
Chr1	17560800	17560900	Chr1	14501000	14501100	Chr4	3955000	3955100	Chr1	14459900	14460000				Chr3	1965100	1965200				Chr4	7883000	7883100
Chr1	17621100	17621200	Chr1	14501200	14501300	Chr4	3955200	3955300	Chr1	14472600	14472700				Chr3	1965200	1965300				Chr4	7883100	7883200
Chr1	17621200	17621300	Chr1	14502100	14502200	Chr4	3955300	3955400	Chr1	14472700	14472800				Chr3	1965300	1965400				Chr4	7883200	7883300
Chr1	17621300	17621400	Chr1	14502800	14502900	Chr4	3955400	3955500	Chr1	14474300	14474400				Chr3	1965400	1965500				Chr4	7883700	7883800
Chr1	17621500	17621600	Chr1	14502900	14503000	Chr4	3955500	3955600	Chr1	14487800	14487900				Chr3	1965500	1965600				Chr4	7883800	7883900
Chr1	17621600	17621700	Chr1	14504800	14504900	Chr4	3955600	3955700	Chr1	14489000	14489100				Chr3	1965600	1965700				Chr4	7884000	7884100
Chr1	17638900	17639000	Chr1	14504900	14505000	Chr4	3955800	3955900	Chr1	14489300	14489400				Chr3	1965700	1965800				Chr4	7884200	7884300
Chr1	17639000	17639100	Chr1	14505100	14505200	Chr4	3970700	3970800	Chr1	14489400	14489500				Chr3	1965800	1965900				Chr4	7884300	7884400
Chr1	17640200	17640300	Chr1	14505200	14505300	Chr4	3974400	3974500	Chr1	14489900	14490000				Chr3	1965900	1966000				Chr4	7885100	7885200
Chr1	17640300	17640400	Chr1	14506000	14506100	Chr4	3976200	3976300	Chr1	14490700	14490800				Chr3	1966000	1966100				Chr4	7885200	7885300
Chr1	17640600	17640700	Chr1	14507600	14507700	Chr4	3981000	3981100	Chr1	14490900	14491000				Chr3	1966100	1966200				Chr4	7885300	7885400
Chr1	17640700	17640800	Chr1	14508700	14508800	Chr4	4000600	4000700	Chr1	14493000	14493100				Chr3	1966200	1966300				Chr4	7885400	7885500
Chr1	17640800	17640900	Chr1	14509000	14509100	Chr4	4042600	4042700	Chr1	14493100	14493200				Chr3	1966300	1966400				Chr4	7885500	7885600
Chr1	17640900	17641000	Chr1	14509500	14509600	Chr4	4042700	4042800	Chr1	14496000	14496100				Chr3	1966400	1966500				Chr4	7885600	7885700
Chr1	17641000	17641100	Chr1	14509600	14509700	Chr4	4097700	4097800	Chr1	14496100	14496200				Chr3	1966500	1966600				Chr4	7890500	7890600
Chr1	17641500	17641600	Chr1	14511300	14511400	Chr4	4645500	4645600	Chr1	14496700	14496800				Chr3	1966600	1966700				Chr4	7890600	7890700
Chr1	17641600	17641700	Chr1	14544500	14544600	Chr4	4681700	4681800	Chr1	14498100	14498200				Chr3	1966700	1966800				Chr4	7890700	7890800
Chr1	17641700	17641800	Chr1	14581700	14581800	Chr4	4683200	4683300	Chr1	14498200	14498300				Chr3	1966800	1966900				Chr4	8056200	8056300
Chr1	17641800	17641900	Chr1	14581800	14581900	Chr4	4776100	4776200	Chr1	14498300	14498400				Chr3	1966900	1967000				Chr4	8056300	8056400
Chr1	17641900	17642000	Chr1	14581900	14582000	Chr4	4776200	4776300	Chr1	14507600	14507700				Chr3	1967100	1967200				Chr4	8255700	8255800
Chr1	17659900	17660000	Chr1	14582000	14582100	Chr4	4777400	4777500	Chr1	14509500	14509600				Chr3	1967200	1967300				Chr4	8459900	8460000
Chr1	17660000	17660100	Chr1	14587100	14587200	Chr4	4785900	4786000	Chr1	14509600	14509700				Chr3	1967300	1967400				Chr4	8503800	8503900
Chr1	17660100	17660200	Chr1	14605500	14605600	Chr4	4786000	4786100	Chr1	14511300	14511400				Chr3	1967400	1967500				Chr4	8530300	8530400
Chr1	17665000	17665100	Chr1	14661700	14661800	Chr4	4789800	4789900	Chr1	14544500	14544600				Chr3	1967500	1967600				Chr4	8712800	8712900
Chr1	17665100	17665200	Chr1	14667000	14667100	Chr4	4896000	4896100	Chr1	14594900	14595000				Chr3	1967600	1967700				Chr4	8712900	8713000
Chr1	17666000	17666100	Chr1	14668600	14668700	Chr4	4965700	4965800	Chr1	14609200	14609300				Chr3	1967700	1967800				Chr4	8979700	8979800
Chr1	17666100	17666200	Chr1	14669200	14669300	Chr4	5025100	5025200	Chr1	14610500	14610600				Chr3	1967800	1967900				Chr4	9289700	9289800
Chr1	17686700	17686800	Chr1	14674500	14674600	Chr4	5044800	5044900	Chr1	14658000	14658100				Chr3	1967900	1968000				Chr4	9815200	9815300
Chr1	17709500	17709600	Chr1	14717700	14717800	Chr4	5127300	5127400	Chr1	14659900	14660000				Chr3	1968000	1968100				Chr4	9873500	9873600
Chr1	17709600	17709700	Chr1	14717800	14717900	Chr4	5132800	5132900	Chr1	14665400	14665500				Chr3	1968100	1968200				Chr4	10093000	10093100
Chr1	17714400	17714500	Chr1	14732400	14732500	Chr4	5132900	5133000	Chr1	14665500	14665600				Chr3	1968200	1968300				Chr4	10112400	10112500
Chr1	17714500	17714600	Chr1	14746700	14746800	Chr4	5134200	5134300	Chr1	14681200	14681300				Chr3	1968300	1968400				Chr4	10302000	10302100
Chr1	17823600	17823700	Chr1	14806300	14806400	Chr4	5272700	5272800	Chr1	14683700	14683800				Chr3	1968400	1968500				Chr4	10326000	10326100
Chr1	17823700	17823800	Chr1	14806600	14806700	Chr4	5456400	5456500	Chr1	14684600	14684700				Chr3	1968500	1968600				Chr4	10578600	10578700
Chr1	17823800	17823900	Chr1	14806900	14807000	Chr4	5471800	5471900	Chr1	14684700	14684800				Chr3	1968600	1968700				Chr4	10578700	10578800
Chr1	17823900	17824000	Chr1	14807300	14807400	Chr4	5471900	5472000	Chr1	14684800	14684900				Chr3	1968700	1968800				Chr4	10942900	10943000
Chr1	17824000	17824100	Chr1	14807400	14807500	Chr4	5472000	5472100	Chr1	14685500	14685600				Chr3	1968800	1968900				Chr4	10943000	10943100
Chr1	17824900	17825000	Chr1	14814200	14814300	Chr4	5472100	5472200	Chr1	14686900	14687000				Chr3	1968900	1969000				Chr4	10990400	10990500
Chr1	17825800	17825900	Chr1	14814600	14814700	Chr4	5474600	5474700	Chr1	14721000	14721100				Chr3	1969000	1969100				Chr4	10991300	10991400
Chr1	17900800	17900900	Chr1	14815100	14815200	Chr4	5478500	5478600	Chr1	14722900	14723000				Chr3	1969100	1969200				Chr4	11335100	11335200
Chr1	17937100	17937200	Chr1	14816000	14816100	Chr4	5490400	5490500	Chr1	14723000	14723100				Chr3	1969200	1969300				Chr4	11335200	11335300
Chr1	17937800	17937900	Chr1	14816100	14816200	Chr4	5517800	5517900	Chr1	14723100	14723200				Chr3	1969300	1969400				Chr4	11483000	11483100
Chr1	17937900	17938000	Chr1	14826400	14826500	Chr4	5517900	5518000	Chr1	14723400	14723500				Chr3	1969400	1969500				Chr4	11646700	11646800
Chr1	18002300	18002400	Chr1	14827000	14827100	Chr4	5560900	5561000	Chr1	14723500	14723600				Chr3	1969500	1969600				Chr4	11646900	11647000
Chr1	18007000	18007100	Chr1	14830400	14830500	Chr4	5561000	5561100	Chr1	14723900	14724000				Chr3	1969600	1969700				Chr4	11647500	11647600
Chr1	18013300	18013400	Chr1	14830500	14830600	Chr4	5671200	5671300	Chr1	14725100	14725200				Chr3	1969700	1969800				Chr4	11647600	11647700
Chr1	18013400	18013500	Chr1	14838700	14838800	Chr4	5682600	5682700	Chr1	14725400	14725500				Chr3	1969800	1969900				Chr4	11647800	11647900
Chr1	18017900	18018000	Chr1	14838800	14838900	Chr4	5743600	5743700	Chr1	14725800	14725900				Chr3	1969900	1970000				Chr4	11647900	11648000
Chr1	18020200	18020300	Chr1	14838900	14839000	Chr4	5836500	5836600	Chr1	14726600	14726700				Chr3	1970000	1970100				Chr4	11648100	11648200
Chr1	18020300	18020400	Chr1	14840500	14840600	Chr4	5947800	5947900	Chr1	14726700	14726800				Chr3	1970100	1970200				Chr4	11774400	11774500
Chr1	18020400	18020500	Chr1	14842100	14842200	Chr4	5947900	5948000	Chr1	14727000	14727100				Chr3	1970200	1970300				Chr4	11774500	11774600
Chr1	18020500	18020600	Chr1	14847000	14847100	Chr4	6115700	6115800	Chr1	14727400	14727500				Chr3	1970300	1970400				Chr4	11930500	11930600
Chr1	18020600	18020700	Chr1	14856700	14856800	Chr4	6529400	6529500	Chr1	14728200	14728300				Chr3	1970400	1970500				Chr4	11930900	11931000
Chr1	18026900	18027000	Chr1	14856800	14856900	Chr4	6529500	6529600	Chr1	14728300	14728400				Chr3	1972100	1972200				Chr4	11935600	11935700
Chr1	18027000	18027100	Chr1	14865400	14865500	Chr4	6530100	6530200	Chr1	14729500	14729600				Chr3	2104900	2105000				Chr4	11936000	11936100
Chr1	18088800	18088900	Chr1	14865900	14866000	Chr4	6530200	6530300	Chr1	14730800	14730900				Chr3	2105000	2105100				Chr4	11954700	11954800
Chr1	18093500	18093600	Chr1	14866000	14866100	Chr4	6534600	6534700	Chr1	14732400	14732500				Chr3	2178100	2178200				Chr4	12225600	12225700
Chr1	18093600	18093700	Chr1	14875700	14875800	Chr4	6534700	6534800	Chr1	14733300	14733400				Chr3	2178200	2178300				Chr4	12320100	12320200
Chr1	18093700	18093800	Chr1	14880600	14880700	Chr4	6536100	6536200	Chr1	14733400	14733500				Chr3	2178300	2178400				Chr4	12353000	12353100
Chr1	18094700	18094800	Chr1	14882200	14882300	Chr4	6536200	6536300	Chr1	14734000	14734100				Chr3	2222200	2222300				Chr4	12353100	12353200
Chr1	18094800	18094900	Chr1	14883800	14883900	Chr4	6661400	6661500	Chr1	14734600	14734700				Chr3	2222300	2222400				Chr4	12429500	12429600
Chr1	18094900	18095000	Chr1	14883900	14884000	Chr4	6701100	6701200	Chr1	14734800	14734900				Chr3	2253600	2253700				Chr4	12429600	12429700
Chr1	18095000	18095100	Chr1	14884000	14884100	Chr4	6757800	6757900	Chr1	14735100	14735200				Chr3	2253700	2253800				Chr4	12686100	12686200
Chr1	18095100	18095200	Chr1	14898200	14898300	Chr4	6757900	6758000	Chr1	14735500	14735600				Chr3	2285600	2285700				Chr4	12741900	12742000
Chr1	18095800	18095900	Chr1	14898300	14898400	Chr4	6905500	6905600	Chr1	14737600	14737700				Chr3	2297400	2297500				Chr4	12742100	12742200
Chr1	18110900	18111000	Chr1	14899200	14899300	Chr4	6912300	6912400	Chr1	14737700	14737800				Chr3	2808000	2808100				Chr4	12742200	12742300
Chr1	18111100	18111200	Chr1	14899700	14899800	Chr4	6943900	6944000	Chr1	14738000	14738100				Chr3	2918400	2918500				Chr4	12742500	12742600
Chr1	18192500	18192600	Chr1	14900100	14900200	Chr4	7030400	7030500	Chr1	14739100	14739200				Chr3	2944600	2944700				Chr4	12744100	12744200
Chr1	18225900	18226000	Chr1	14906900	14907000	Chr4	7185700	7185800	Chr1	14739200	14739300				Chr3	2945600	2945700				Chr4	13006200	13006300
Chr1	18226000	18226100	Chr1	14907000	14907100	Chr4	7231400	7231500	Chr1	14739600	14739700				Chr3	2945700	2945800				Chr4	13058800	13058900
Chr1	18226100	18226200	Chr1	14907400	14907500	Chr4	7232800	7232900	Chr1	14740200	14740300				Chr3	3090500	3090600				Chr4	13075500	13075600
Chr1	18226200	18226300	Chr1	14907600	14907700	Chr4	7235200	7235300	Chr1	14740600	14740700				Chr3	3096200	3096300				Chr4	13285400	13285500
Chr1	18226400	18226500	Chr1	14907700	14907800	Chr4	7845700	7845800	Chr1	14741000	14741100				Chr3	3238300	3238400				Chr4	13295900	13296000
Chr1	18226600	18226700	Chr1	14908000	14908100	Chr4	7846800	7846900	Chr1	14741300	14741400				Chr3	3238400	3238500				Chr4	13296000	13296100
Chr1	18282200	18282300	Chr1	14924300	14924400	Chr4	7878700	7878800	Chr1	14741500	14741600				Chr3	3366300	3366400				Chr4	13296100	13296200
Chr1	18282300	18282400	Chr1	14924400	14924500	Chr4	7885200	7885300	Chr1	14741800	14741900				Chr3	3366400	3366500				Chr4	13332800	13332900
Chr1	18297500	18297600	Chr1	14925200	14925300	Chr4	7885300	7885400	Chr1	14742100	14742200				Chr3	3535100	3535200				Chr4	13454500	13454600
Chr1	18300300	18300400	Chr1	14925300	14925400	Chr4	7885400	7885500	Chr1	14742600	14742700				Chr3	3535200	3535300				Chr4	13704700	13704800
Chr1	18300400	18300500	Chr1	14925400	14925500	Chr4	8064800	8064900	Chr1	14742900	14743000				Chr3	3572400	3572500				Chr4	13704800	13704900
Chr1	18386400	18386500	Chr1	14926100	14926200	Chr4	8064900	8065000	Chr1	14745000	14745100				Chr3	3572500	3572600				Chr4	13782200	13782300
Chr1	18387400	18387500	Chr1	14926200	14926300	Chr4	8503800	8503900	Chr1	14805600	14805700				Chr3	3575800	3575900				Chr4	13782300	13782400
Chr1	18548100	18548200	Chr1	14926400	14926500	Chr4	8819900	8820000	Chr1	14806600	14806700				Chr3	3575900	3576000				Chr4	13882900	13883000
Chr1	18548200	18548300	Chr1	14926500	14926600	Chr4	8899800	8899900	Chr1	14806800	14806900				Chr3	3599700	3599800				Chr4	13885200	13885300
Chr1	18548300	18548400	Chr1	14933000	14933100	Chr4	8901600	8901700	Chr1	14807100	14807200				Chr3	3599800	3599900				Chr4	14032400	14032500
Chr1	18549500	18549600	Chr1	14935400	14935500	Chr4	9111600	9111700	Chr1	14815500	14815600				Chr3	3622600	3622700				Chr4	14032500	14032600
Chr1	18549600	18549700	Chr1	14938400	14938500	Chr4	9111700	9111800	Chr1	14815600	14815700				Chr3	3622700	3622800				Chr4	14202900	14203000
Chr1	18557900	18558000	Chr1	14943600	14943700	Chr4	9146800	9146900	Chr1	14819700	14819800				Chr3	3628000	3628100				Chr4	14470200	14470300
Chr1	18580400	18580500	Chr1	14943800	14943900	Chr4	9146900	9147000	Chr1	14819900	14820000				Chr3	3628100	3628200				Chr4	14470300	14470400
Chr1	18632800	18632900	Chr1	14948600	14948700	Chr4	9575400	9575500	Chr1	14820000	14820100				Chr3	3628200	3628300				Chr4	15074900	15075000
Chr1	18644700	18644800	Chr1	14963900	14964000	Chr4	9956100	9956200	Chr1	14829300	14829400				Chr3	3838000	3838100				Chr4	15075000	15075100
Chr1	18859300	18859400	Chr1	14968600	14968700	Chr4	10112400	10112500	Chr1	14838400	14838500				Chr3	3942000	3942100				Chr4	15100500	15100600
Chr1	18895000	18895100	Chr1	15007700	15007800	Chr4	10539000	10539100	Chr1	14840500	14840600				Chr3	4254500	4254600				Chr4	15415400	15415500
Chr1	18895200	18895300	Chr1	15007800	15007900	Chr4	10539200	10539300	Chr1	14846000	14846100				Chr3	4254600	4254700				Chr4	15415500	15415600
Chr1	18895300	18895400	Chr1	15007900	15008000	Chr4	10553900	10554000	Chr1	14847900	14848000				Chr3	4330700	4330800				Chr4	15502400	15502500
Chr1	18906200	18906300	Chr1	15019800	15019900	Chr4	10578600	10578700	Chr1	14848000	14848100				Chr3	4330800	4330900				Chr4	15502500	15502600
Chr1	18906300	18906400	Chr1	15022400	15022500	Chr4	10792600	10792700	Chr1	14849300	14849400				Chr3	4387900	4388000				Chr4	15573800	15573900
Chr1	18906400	18906500	Chr1	15023700	15023800	Chr4	10793800	10793900	Chr1	14855900	14856000				Chr3	4411200	4411300				Chr4	15573900	15574000
Chr1	18906500	18906600	Chr1	15024500	15024600	Chr4	10870800	10870900	Chr1	14856000	14856100				Chr3	4561100	4561200				Chr4	15671300	15671400
Chr1	18925000	18925100	Chr1	15025800	15025900	Chr4	11080700	11080800	Chr1	14857200	14857300				Chr3	4561200	4561300				Chr4	15671400	15671500
Chr1	19023800	19023900	Chr1	15025900	15026000	Chr4	11080800	11080900	Chr1	14858500	14858600				Chr3	4951500	4951600				Chr4	15804500	15804600
Chr1	19023900	19024000	Chr1	15026300	15026400	Chr4	11080900	11081000	Chr1	14864200	14864300				Chr3	4951600	4951700				Chr4	15804600	15804700
Chr1	19024000	19024100	Chr1	15027300	15027400	Chr4	11081000	11081100	Chr1	14865400	14865500				Chr3	4998100	4998200				Chr4	15866800	15866900
Chr1	19024100	19024200	Chr1	15028500	15028600	Chr4	11193000	11193100	Chr1	14865500	14865600				Chr3	4998200	4998300				Chr4	15866900	15867000
Chr1	19026800	19026900	Chr1	15029700	15029800	Chr4	11230900	11231000	Chr1	14866700	14866800				Chr3	5063200	5063300				Chr4	15965100	15965200
Chr1	19026900	19027000	Chr1	15032000	15032100	Chr4	11676500	11676600	Chr1	14866800	14866900				Chr3	5068200	5068300				Chr4	15965200	15965300
Chr1	19054400	19054500	Chr1	15033600	15033700	Chr4	11681200	11681300	Chr1	14873400	14873500				Chr3	5068300	5068400				Chr4	16454700	16454800
Chr1	19063800	19063900	Chr1	15034800	15034900	Chr4	11979500	11979600	Chr1	14874700	14874800				Chr3	5275100	5275200				Chr4	16556600	16556700
Chr1	19073100	19073200	Chr1	15036400	15036500	Chr4	12225600	12225700	Chr1	14874800	14874900				Chr3	5275200	5275300				Chr4	16754800	16754900
Chr1	19073200	19073300	Chr1	15040300	15040400	Chr4	12353100	12353200	Chr1	14876700	14876800				Chr3	5387100	5387200				Chr4	16754900	16755000
Chr1	19073300	19073400	Chr1	15041500	15041600	Chr4	12606600	12606700	Chr1	14882200	14882300				Chr3	5387200	5387300				Chr4	17130000	17130100
Chr1	19073400	19073500	Chr1	15041700	15041800	Chr4	12625700	12625800	Chr1	14884300	14884400				Chr3	5632800	5632900				Chr4	17149400	17149500
Chr1	19198100	19198200	Chr1	15042000	15042100	Chr4	13454500	13454600	Chr1	14887900	14888000				Chr3	5830000	5830100				Chr4	17149500	17149600
Chr1	19249000	19249100	Chr1	15042100	15042200	Chr4	13782200	13782300	Chr1	14889200	14889300				Chr3	5830100	5830200				Chr4	17500800	17500900
Chr1	19249100	19249200	Chr1	15042300	15042400	Chr4	14122300	14122400	Chr1	14898700	14898800				Chr3	5830200	5830300				Chr4	17831800	17831900
Chr1	19336300	19336400	Chr1	15042600	15042700	Chr4	14284700	14284800	Chr1	14898800	14898900				Chr3	5830300	5830400				Chr4	17831900	17832000
Chr1	19336400	19336500	Chr1	15042700	15042800	Chr4	15074900	15075000	Chr1	14907200	14907300				Chr3	5835200	5835300				Chr4	18087200	18087300
Chr1	19339600	19339700	Chr1	15042800	15042900	Chr4	15398600	15398700	Chr1	14907400	14907500				Chr3	5862000	5862100				Chr4	18087300	18087400
Chr1	19345100	19345200	Chr1	15043300	15043400	Chr4	15415400	15415500	Chr1	14907500	14907600				Chr3	5862100	5862200				Chr4	18097300	18097400
Chr1	19389700	19389800	Chr1	15043400	15043500	Chr4	15415500	15415600	Chr1	14907700	14907800				Chr3	5862200	5862300				Chr4	18098100	18098200
Chr1	19403400	19403500	Chr1	15044200	15044300	Chr4	15804500	15804600	Chr1	14908600	14908700				Chr3	5862300	5862400				Chr4	18163900	18164000
Chr1	19576500	19576600	Chr1	15044300	15044400	Chr4	15922900	15923000	Chr1	14908700	14908800				Chr3	6127800	6127900				Chr4	18164400	18164500
Chr1	19577000	19577100	Chr1	15044400	15044500	Chr4	15965200	15965300	Chr1	14924800	14924900				Chr3	6127900	6128000				Chr4	18165100	18165200
Chr1	19577100	19577200	Chr1	15044500	15044600	Chr4	16055300	16055400	Chr1	14925200	14925300				Chr3	6244600	6244700				Chr4	18216200	18216300
Chr1	19577200	19577300	Chr1	15044700	15044800	Chr4	16055400	16055500	Chr1	15017400	15017500				Chr3	6483900	6484000				Chr4	18254900	18255000
Chr1	19577300	19577400	Chr1	15050000	15050100	Chr4	16055500	16055600	Chr1	15018800	15018900				Chr3	6484000	6484100				Chr4	18255000	18255100
Chr1	19577400	19577500	Chr1	15051200	15051300	Chr4	16326600	16326700	Chr1	15019400	15019500				Chr3	6488200	6488300				Chr4	18274400	18274500
Chr1	19577500	19577600	Chr1	15051400	15051500	Chr4	16754800	16754900	Chr1	15019500	15019600				Chr3	6488300	6488400				Chr4	18274500	18274600
Chr1	19577600	19577700	Chr1	15051700	15051800	Chr4	16864000	16864100	Chr1	15020900	15021000				Chr3	6540600	6540700				Chr4	18293700	18293800
Chr1	19577700	19577800	Chr1	15051800	15051900	Chr4	17082200	17082300	Chr1	15023700	15023800				Chr3	6540700	6540800				Chr4	18293800	18293900
Chr1	19577800	19577900	Chr1	15052000	15052100	Chr4	18216200	18216300	Chr1	15024000	15024100				Chr3	6574000	6574100				Chr4	18304900	18305000
Chr1	19577900	19578000	Chr1	15052100	15052200	Chr4	18232500	18232600	Chr1	15024100	15024200				Chr3	6574100	6574200				Chr4	18305000	18305100
Chr1	19578100	19578200	Chr1	15052200	15052300	Chr4	18232900	18233000	Chr1	15025800	15025900				Chr3	6663700	6663800				Chr4	18305300	18305400
Chr1	19578200	19578300	Chr1	15052300	15052400	Chr4	18251400	18251500	Chr1	15025900	15026000				Chr3	7103500	7103600				Chr4	18305600	18305700
Chr1	19728700	19728800	Chr1	15052400	15052500	Chr4	18293700	18293800	Chr1	15026900	15027000				Chr3	7104100	7104200				Chr4	18411200	18411300
Chr1	19728800	19728900	Chr1	15052500	15052600	Chr4	18532500	18532600	Chr1	15027000	15027100				Chr3	7104200	7104300				Chr4	18411300	18411400
Chr1	19728900	19729000	Chr1	15060300	15060400	Chr4	18533400	18533500	Chr1	15029000	15029100				Chr3	7104300	7104400				Chr5	150400	150500
Chr1	19729000	19729100	Chr1	15060400	15060500	Chr4	18533500	18533600	Chr1	15029700	15029800				Chr3	7104500	7104600				Chr5	209100	209200
Chr1	19729200	19729300	Chr1	15061100	15061200	Chr5	150400	150500	Chr1	15030400	15030500				Chr3	7104600	7104700				Chr5	209200	209300
Chr1	19861400	19861500	Chr1	15061200	15061300	Chr5	250800	250900	Chr1	15030500	15030600				Chr3	7224200	7224300				Chr5	209300	209400
Chr1	20024200	20024300	Chr1	15061300	15061400	Chr5	393600	393700	Chr1	15032000	15032100				Chr3	7259800	7259900				Chr5	209400	209500
Chr1	20024300	20024400	Chr1	15061600	15061700	Chr5	530800	530900	Chr1	15032300	15032400				Chr3	7319500	7319600				Chr5	426400	426500
Chr1	20039500	20039600	Chr1	15062200	15062300	Chr5	559300	559400	Chr1	15032400	15032500				Chr3	7319600	7319700				Chr5	426900	427000
Chr1	20115500	20115600	Chr1	15062500	15062600	Chr5	559400	559500	Chr1	15033200	15033300				Chr3	7567300	7567400				Chr5	427000	427100
Chr1	20128100	20128200	Chr1	15062600	15062700	Chr5	614600	614700	Chr1	15033300	15033400				Chr3	7567400	7567500				Chr5	463400	463500
Chr1	20206600	20206700	Chr1	15063900	15064000	Chr5	897000	897100	Chr1	15034800	15034900				Chr3	7682300	7682400				Chr5	506700	506800
Chr1	20206700	20206800	Chr1	15064300	15064400	Chr5	897200	897300	Chr1	15035200	15035300				Chr3	7682400	7682500				Chr5	506800	506900
Chr1	20206800	20206900	Chr1	15064600	15064700	Chr5	897300	897400	Chr1	15035300	15035400				Chr3	7682500	7682600				Chr5	508400	508500
Chr1	20397800	20397900	Chr1	15064800	15064900	Chr5	2188600	2188700	Chr1	15035900	15036000				Chr3	7682800	7682900				Chr5	530800	530900
Chr1	20470000	20470100	Chr1	15065100	15065200	Chr5	2347800	2347900	Chr1	15036000	15036100				Chr3	7682900	7683000				Chr5	554300	554400
Chr1	20470100	20470200	Chr1	15067800	15067900	Chr5	2348500	2348600	Chr1	15041000	15041100				Chr3	7848800	7848900				Chr5	559300	559400
Chr1	20475800	20475900	Chr1	15067900	15068000	Chr5	2432300	2432400	Chr1	15041600	15041700				Chr3	7848900	7849000				Chr5	559400	559500
Chr1	20477000	20477100	Chr1	15068100	15068200	Chr5	2603200	2603300	Chr1	15041800	15041900				Chr3	7849900	7850000				Chr5	588900	589000
Chr1	20477100	20477200	Chr1	15072900	15073000	Chr5	2603700	2603800	Chr1	15042100	15042200				Chr3	7850200	7850300				Chr5	614600	614700
Chr1	20477500	20477600	Chr1	15073800	15073900	Chr5	2634900	2635000	Chr1	15042200	15042300				Chr3	7852800	7852900				Chr5	772100	772200
Chr1	20559700	20559800	Chr1	15074400	15074500	Chr5	2838700	2838800	Chr1	15042300	15042400				Chr3	7853000	7853100				Chr5	858500	858600
Chr1	20684200	20684300	Chr1	15074900	15075000	Chr5	2840700	2840800	Chr1	15042800	15042900				Chr3	7858900	7859000				Chr5	858600	858700
Chr1	20684400	20684500	Chr1	15075000	15075100	Chr5	2975000	2975100	Chr1	15043400	15043500				Chr3	7859800	7859900				Chr5	862400	862500
Chr1	20684500	20684600	Chr1	15075500	15075600	Chr5	2975100	2975200	Chr1	15044400	15044500				Chr3	7860000	7860100				Chr5	897000	897100
Chr1	20684700	20684800	Chr1	15077200	15077300	Chr5	2993300	2993400	Chr1	15044500	15044600				Chr3	7860200	7860300				Chr5	897200	897300
Chr1	20685500	20685600	Chr1	15081900	15082000	Chr5	3005400	3005500	Chr1	15050700	15050800				Chr3	7861900	7862000				Chr5	897300	897400
Chr1	20772200	20772300	Chr1	15082000	15082100	Chr5	3014900	3015000	Chr1	15051300	15051400				Chr3	7862100	7862200				Chr5	970800	970900
Chr1	20926200	20926300	Chr1	15082100	15082200	Chr5	3015000	3015100	Chr1	15051500	15051600				Chr3	8039000	8039100				Chr5	1742600	1742700
Chr1	20926300	20926400	Chr1	15082200	15082300	Chr5	3015100	3015200	Chr1	15051700	15051800				Chr3	8108000	8108100				Chr5	1742700	1742800
Chr1	20926400	20926500	Chr1	15082300	15082400	Chr5	3111000	3111100	Chr1	15051800	15051900				Chr3	8108100	8108200				Chr5	1804600	1804700
Chr1	20927100	20927200	Chr1	15082400	15082500	Chr5	3116000	3116100	Chr1	15051900	15052000				Chr3	8236100	8236200				Chr5	1817100	1817200
Chr1	20927200	20927300	Chr1	15082500	15082600	Chr5	3456700	3456800	Chr1	15052100	15052200				Chr3	8236200	8236300				Chr5	1853300	1853400
Chr1	20927300	20927400	Chr1	15082600	15082700	Chr5	3549900	3550000	Chr1	15052200	15052300				Chr3	8343900	8344000				Chr5	1867800	1867900
Chr1	20972100	20972200	Chr1	15082700	15082800	Chr5	3867200	3867300	Chr1	15052500	15052600				Chr3	8529900	8530000				Chr5	2212600	2212700
Chr1	20972500	20972600	Chr1	15082800	15082900	Chr5	4162100	4162200	Chr1	15052800	15052900				Chr3	8979000	8979100				Chr5	2212700	2212800
Chr1	20972600	20972700	Chr1	15082900	15083000	Chr5	4162200	4162300	Chr1	15060500	15060600				Chr3	8979100	8979200				Chr5	2309400	2309500
Chr1	20979400	20979500	Chr1	15083000	15083100	Chr5	4691100	4691200	Chr1	15061100	15061200				Chr3	8979300	8979400				Chr5	2309500	2309600
Chr1	20979500	20979600	Chr1	15083100	15083200	Chr5	4694700	4694800	Chr1	15062500	15062600				Chr3	8979400	8979500				Chr5	2411200	2411300
Chr1	21066600	21066700	Chr1	15083200	15083300	Chr5	4776100	4776200	Chr1	15064600	15064700				Chr3	8979500	8979600				Chr5	2432300	2432400
Chr1	21066700	21066800	Chr1	15083300	15083400	Chr5	4776200	4776300	Chr1	15066000	15066100				Chr3	9117700	9117800				Chr5	2587800	2587900
Chr1	21081600	21081700	Chr1	15083400	15083500	Chr5	5063500	5063600	Chr1	15070400	15070500				Chr3	9225900	9226000				Chr5	2838700	2838800
Chr1	21081700	21081800	Chr1	15083500	15083600	Chr5	5288500	5288600	Chr1	15074300	15074400				Chr3	9372300	9372400				Chr5	2840700	2840800
Chr1	21120400	21120500	Chr1	15083700	15083800	Chr5	5428700	5428800	Chr1	15074400	15074500				Chr3	9372400	9372500				Chr5	2975000	2975100
Chr1	21120500	21120600	Chr1	15083800	15083900	Chr5	5977500	5977600	Chr1	15074700	15074800				Chr3	9550800	9550900				Chr5	2975100	2975200
Chr1	21125000	21125100	Chr1	15083900	15084000	Chr5	6419900	6420000	Chr1	15074900	15075000				Chr3	9609000	9609100				Chr5	2975200	2975300
Chr1	21125100	21125200	Chr1	15084000	15084100	Chr5	6461200	6461300	Chr1	15075000	15075100				Chr3	9609100	9609200				Chr5	2993300	2993400
Chr1	21125200	21125300	Chr1	15084100	15084200	Chr5	6632900	6633000	Chr1	15081900	15082000				Chr3	9609700	9609800				Chr5	3005300	3005400
Chr1	21125300	21125400	Chr1	15084200	15084300	Chr5	6702000	6702100	Chr1	15082000	15082100				Chr3	9828100	9828200				Chr5	3005400	3005500
Chr1	21125900	21126000	Chr1	15084300	15084400	Chr5	6926100	6926200	Chr1	15082100	15082200				Chr3	9831400	9831500				Chr5	3014900	3015000
Chr1	21126000	21126100	Chr1	15084400	15084500	Chr5	6926400	6926500	Chr1	15082200	15082300				Chr3	9831500	9831600				Chr5	3015000	3015100
Chr1	21211100	21211200	Chr1	15084500	15084600	Chr5	7075300	7075400	Chr1	15082300	15082400				Chr3	9839100	9839200				Chr5	3015100	3015200
Chr1	21211200	21211300	Chr1	15084600	15084700	Chr5	7075400	7075500	Chr1	15082400	15082500				Chr3	9839200	9839300				Chr5	3015200	3015300
Chr1	21216200	21216300	Chr1	15084700	15084800	Chr5	7417700	7417800	Chr1	15082500	15082600				Chr3	9856500	9856600				Chr5	3030800	3030900
Chr1	21216300	21216400	Chr1	15084800	15084900	Chr5	7488200	7488300	Chr1	15082600	15082700				Chr3	9856600	9856700				Chr5	3111000	3111100
Chr1	21228800	21228900	Chr1	15084900	15085000	Chr5	7740600	7740700	Chr1	15082700	15082800				Chr3	9857600	9857700				Chr5	3118400	3118500
Chr1	21260100	21260200	Chr1	15085100	15085200	Chr5	7833900	7834000	Chr1	15082800	15082900				Chr3	9870300	9870400				Chr5	3212300	3212400
Chr1	21260200	21260300	Chr1	15085200	15085300	Chr5	7934800	7934900	Chr1	15082900	15083000				Chr3	9870400	9870500				Chr5	3324700	3324800
Chr1	21335300	21335400	Chr1	15085300	15085400	Chr5	7934900	7935000	Chr1	15083100	15083200				Chr3	10057500	10057600				Chr5	3343400	3343500
Chr1	21336300	21336400	Chr1	15085400	15085500	Chr5	8148100	8148200	Chr1	15083200	15083300				Chr3	10210300	10210400				Chr5	3343500	3343600
Chr1	21336400	21336500	Chr1	15085500	15085600	Chr5	8313400	8313500	Chr1	15083300	15083400				Chr3	10318200	10318300				Chr5	3456600	3456700
Chr1	21507800	21507900	Chr1	15085600	15085700	Chr5	8398200	8398300	Chr1	15083400	15083500				Chr3	10318300	10318400				Chr5	3578300	3578400
Chr1	21525100	21525200	Chr1	15085700	15085800	Chr5	8398300	8398400	Chr1	15083600	15083700				Chr3	10324600	10324700				Chr5	3617000	3617100
Chr1	21681500	21681600	Chr1	15085800	15085900	Chr5	8446300	8446400	Chr1	15083700	15083800				Chr3	10324700	10324800				Chr5	3669000	3669100
Chr1	21739100	21739200	Chr1	15085900	15086000	Chr5	8527500	8527600	Chr1	15083800	15083900				Chr3	10328400	10328500				Chr5	3802800	3802900
Chr1	21739200	21739300	Chr1	15086000	15086100	Chr5	8611700	8611800	Chr1	15083900	15084000				Chr3	10328500	10328600				Chr5	4162100	4162200
Chr1	21741600	21741700	Chr1	15089400	15089500	Chr5	8749300	8749400	Chr1	15084000	15084100				Chr3	10328600	10328700				Chr5	4162200	4162300
Chr1	21766300	21766400	Chr1	15089900	15090000	Chr5	8766900	8767000	Chr1	15084100	15084200				Chr3	10328700	10328800				Chr5	4162300	4162400
Chr1	21777900	21778000	Chr1	15090400	15090500	Chr5	8767000	8767100	Chr1	15084200	15084300				Chr3	10329000	10329100				Chr5	4471000	4471100
Chr1	21784900	21785000	Chr1	15093500	15093600	Chr5	9068200	9068300	Chr1	15084300	15084400				Chr3	10329100	10329200				Chr5	4530500	4530600
Chr1	21802600	21802700	Chr1	15097400	15097500	Chr5	9068300	9068400	Chr1	15084400	15084500				Chr3	10329200	10329300				Chr5	4617800	4617900
Chr1	21821100	21821200	Chr1	15099100	15099200	Chr5	9069400	9069500	Chr1	15084500	15084600				Chr3	10706700	10706800				Chr5	4617900	4618000
Chr1	21825700	21825800	Chr1	15101300	15101400	Chr5	9069900	9070000	Chr1	15084600	15084700				Chr3	10706800	10706900				Chr5	4690000	4690100
Chr1	21838900	21839000	Chr1	15104100	15104200	Chr5	9102700	9102800	Chr1	15084700	15084800				Chr3	10752400	10752500				Chr5	4691000	4691100
Chr1	21853700	21853800	Chr1	15105100	15105200	Chr5	9136100	9136200	Chr1	15084800	15084900				Chr3	10752500	10752600				Chr5	4691100	4691200
Chr1	21858000	21858100	Chr1	15107400	15107500	Chr5	9182500	9182600	Chr1	15084900	15085000				Chr3	10759300	10759400				Chr5	4694600	4694700
Chr1	21858100	21858200	Chr1	15108000	15108100	Chr5	9184000	9184100	Chr1	15085100	15085200				Chr3	10759400	10759500				Chr5	4694700	4694800
Chr1	21918400	21918500	Chr1	15108700	15108800	Chr5	9184100	9184200	Chr1	15085200	15085300				Chr3	10925000	10925100				Chr5	4762200	4762300
Chr1	21991100	21991200	Chr1	15109300	15109400	Chr5	9494100	9494200	Chr1	15085300	15085400				Chr3	10925100	10925200				Chr5	4866400	4866500
Chr1	21992600	21992700	Chr1	15109400	15109500	Chr5	9567600	9567700	Chr1	15085400	15085500				Chr3	11023200	11023300				Chr5	4866500	4866600
Chr1	22040600	22040700	Chr1	15111400	15111500	Chr5	9591600	9591700	Chr1	15085500	15085600				Chr3	11035600	11035700				Chr5	4866600	4866700
Chr1	22060600	22060700	Chr1	15111500	15111600	Chr5	9741800	9741900	Chr1	15085600	15085700				Chr3	11075500	11075600				Chr5	4866700	4866800
Chr1	22060700	22060800	Chr1	15113300	15113400	Chr5	9751100	9751200	Chr1	15085700	15085800				Chr3	11075600	11075700				Chr5	4866800	4866900
Chr1	22061100	22061200	Chr1	15115400	15115500	Chr5	9752900	9753000	Chr1	15085800	15085900				Chr3	11313400	11313500				Chr5	4929500	4929600
Chr1	22085300	22085400	Chr1	15117200	15117300	Chr5	9753100	9753200	Chr1	15085900	15086000				Chr3	11348700	11348800				Chr5	4929600	4929700
Chr1	22105400	22105500	Chr1	15121400	15121500	Chr5	9867500	9867600	Chr1	15086000	15086100				Chr3	11348800	11348900				Chr5	5212400	5212500
Chr1	22106500	22106600	Chr1	15123300	15123400	Chr5	9867600	9867700	Chr1	15089100	15089200				Chr3	11348900	11349000				Chr5	5358900	5359000
Chr1	22106600	22106700	Chr1	15127200	15127300	Chr5	9930900	9931000	Chr1	15089400	15089500				Chr3	11349100	11349200				Chr5	5600900	5601000
Chr1	22112600	22112700	Chr1	15131100	15131200	Chr5	9963700	9963800	Chr1	15089900	15090000				Chr3	11349200	11349300				Chr5	5601000	5601100
Chr1	22149800	22149900	Chr1	15131200	15131300	Chr5	10041900	10042000	Chr1	15090400	15090500				Chr3	11349300	11349400				Chr5	5937800	5937900
Chr1	22162500	22162600	Chr1	15137300	15137400	Chr5	10073900	10074000	Chr1	15094300	15094400				Chr3	11349500	11349600				Chr5	5938600	5938700
Chr1	22165100	22165200	Chr1	15138300	15138400	Chr5	10127800	10127900	Chr1	15094800	15094900				Chr3	11349600	11349700				Chr5	6258100	6258200
Chr1	22192400	22192500	Chr1	15145200	15145300	Chr5	10198200	10198300	Chr1	15098200	15098300				Chr3	11349700	11349800				Chr5	6258200	6258300
Chr1	22313400	22313500	Chr1	15145700	15145800	Chr5	10198500	10198600	Chr1	15099900	15100000				Chr3	11350400	11350500				Chr5	6401200	6401300
Chr1	22323200	22323300	Chr1	15170000	15170100	Chr5	10270400	10270500	Chr1	15100400	15100500				Chr3	11350800	11350900				Chr5	6401300	6401400
Chr1	22323300	22323400	Chr1	15179100	15179200	Chr5	10480300	10480400	Chr1	15103200	15103300				Chr3	11351100	11351200				Chr5	6975500	6975600
Chr1	22394600	22394700	Chr1	15179400	15179500	Chr5	10609600	10609700	Chr1	15103300	15103400				Chr3	11351300	11351400				Chr5	7387900	7388000
Chr1	22397500	22397600	Chr1	15179500	15179600	Chr5	10681200	10681300	Chr1	15104800	15104900				Chr3	11351400	11351500				Chr5	7740600	7740700
Chr1	22397600	22397700	Chr1	15180000	15180100	Chr5	10681300	10681400	Chr1	15112800	15112900				Chr3	11351500	11351600				Chr5	7981400	7981500
Chr1	22451200	22451300	Chr1	15180100	15180200	Chr5	10714900	10715000	Chr1	15116700	15116800				Chr3	11352500	11352600				Chr5	8366500	8366600
Chr1	22542100	22542200	Chr1	15180200	15180300	Chr5	10762300	10762400	Chr1	15117900	15118000				Chr3	11352600	11352700				Chr5	8906400	8906500
Chr1	22542200	22542300	Chr1	15180300	15180400	Chr5	10762400	10762500	Chr1	15126700	15126800				Chr3	11352700	11352800				Chr5	8946800	8946900
Chr1	22620900	22621000	Chr1	15180400	15180500	Chr5	10765100	10765200	Chr1	15130600	15130700				Chr3	11352800	11352900				Chr5	8972400	8972500
Chr1	22621400	22621500	Chr1	15180500	15180600	Chr5	10766600	10766700	Chr1	15135800	15135900				Chr3	11352900	11353000				Chr5	8972500	8972600
Chr1	22621700	22621800	Chr1	15180700	15180800	Chr5	10766700	10766800	Chr1	15136700	15136800				Chr3	11353000	11353100				Chr5	8972900	8973000
Chr1	22743300	22743400	Chr1	15181500	15181600	Chr5	10766800	10766900	Chr1	15138300	15138400				Chr3	11353100	11353200				Chr5	9079700	9079800
Chr1	22743400	22743500	Chr1	15181600	15181700	Chr5	10772200	10772300	Chr1	15138400	15138500				Chr3	11353200	11353300				Chr5	9080000	9080100
Chr1	22795700	22795800	Chr1	15181700	15181800	Chr5	10772300	10772400	Chr1	15143900	15144000				Chr3	11353300	11353400				Chr5	9080500	9080600
Chr1	22795800	22795900	Chr1	15182700	15182800	Chr5	10827300	10827400	Chr1	15144400	15144500				Chr3	11353500	11353600				Chr5	9081700	9081800
Chr1	22872400	22872500	Chr1	15183100	15183200	Chr5	11144900	11145000	Chr1	15144700	15144800				Chr3	11353600	11353700				Chr5	9494000	9494100
Chr1	22872500	22872600	Chr1	15186400	15186500	Chr5	11184500	11184600	Chr1	15145200	15145300				Chr3	11353700	11353800				Chr5	9494100	9494200
Chr1	22872700	22872800	Chr1	15186500	15186600	Chr5	11184600	11184700	Chr1	15145700	15145800				Chr3	11353800	11353900				Chr5	9494500	9494600
Chr1	22887100	22887200	Chr1	15187700	15187800	Chr5	11184700	11184800	Chr1	15170500	15170600				Chr3	11353900	11354000				Chr5	9789500	9789600
Chr1	22888100	22888200	Chr1	15188400	15188500	Chr5	11184800	11184900	Chr1	15172500	15172600				Chr3	11354000	11354100				Chr5	9789600	9789700
Chr1	22889500	22889600	Chr1	15188500	15188600	Chr5	11184900	11185000	Chr1	15174500	15174600				Chr3	11354400	11354500				Chr5	9815400	9815500
Chr1	22930000	22930100	Chr1	15188700	15188800	Chr5	11185000	11185100	Chr1	15176500	15176600				Chr3	11354500	11354600				Chr5	9832500	9832600
Chr1	22930100	22930200	Chr1	15188800	15188900	Chr5	11185100	11185200	Chr1	15179900	15180000				Chr3	11354600	11354700				Chr5	9832600	9832700
Chr1	22992200	22992300	Chr1	15189400	15189500	Chr5	11185200	11185300	Chr1	15180000	15180100				Chr3	11354700	11354800				Chr5	10019400	10019500
Chr1	22992300	22992400	Chr1	15189500	15189600	Chr5	11185300	11185400	Chr1	15180400	15180500				Chr3	11354800	11354900				Chr5	10373200	10373300
Chr1	22992700	22992800	Chr1	15189600	15189700	Chr5	11185400	11185500	Chr1	15180500	15180600				Chr3	11354900	11355000				Chr5	11186800	11186900
Chr1	23125200	23125300	Chr1	15189700	15189800	Chr5	11185500	11185600	Chr1	15181300	15181400				Chr3	11355000	11355100				Chr5	11187300	11187400
Chr1	23174900	23175000	Chr1	15189800	15189900	Chr5	11185600	11185700	Chr1	15181400	15181500				Chr3	11355100	11355200				Chr5	11187800	11187900
Chr1	23178100	23178200	Chr1	15190500	15190600	Chr5	11185700	11185800	Chr1	15186000	15186100				Chr3	11355200	11355300				Chr5	11188800	11188900
Chr1	23214700	23214800	Chr1	15190800	15190900	Chr5	11185800	11185900	Chr1	15186700	15186800				Chr3	11355300	11355400				Chr5	11312000	11312100
Chr1	23214800	23214900	Chr1	15191400	15191500	Chr5	11185900	11186000	Chr1	15186900	15187000				Chr3	11355400	11355500				Chr5	12809300	12809400
Chr1	23247000	23247100	Chr1	15191600	15191700	Chr5	11186000	11186100	Chr1	15190000	15190100				Chr3	11355500	11355600				Chr5	12811200	12811300
Chr1	23276300	23276400	Chr1	15191700	15191800	Chr5	11186100	11186200	Chr1	15190500	15190600				Chr3	11357500	11357600				Chr5	12811500	12811600
Chr1	23299600	23299700	Chr1	15191900	15192000	Chr5	11186200	11186300	Chr1	15190700	15190800				Chr3	11357600	11357700				Chr5	12814200	12814300
Chr1	23300200	23300300	Chr1	15192200	15192300	Chr5	11186300	11186400	Chr1	15191700	15191800				Chr3	11357700	11357800				Chr5	12816200	12816300
Chr1	23302200	23302300	Chr1	15192300	15192400	Chr5	11186400	11186500	Chr1	15191900	15192000				Chr3	11357800	11357900				Chr5	12817000	12817100
Chr1	23302300	23302400	Chr1	15192600	15192700	Chr5	11186500	11186600	Chr1	15192100	15192200				Chr3	11481900	11482000				Chr5	12818200	12818300
Chr1	23302500	23302600	Chr1	15192700	15192800	Chr5	11186600	11186700	Chr1	15192200	15192300				Chr3	11482000	11482100				Chr5	12818500	12818600
Chr1	23307300	23307400	Chr1	15192900	15193000	Chr5	11186700	11186800	Chr1	15192300	15192400				Chr3	11482700	11482800				Chr5	12820200	12820300
Chr1	23307400	23307500	Chr1	15193500	15193600	Chr5	11186800	11186900	Chr1	15192500	15192600				Chr3	11482800	11482900				Chr5	12821000	12821100
Chr1	23307500	23307600	Chr1	15204500	15204600	Chr5	11186900	11187000	Chr1	15192600	15192700				Chr3	11586100	11586200				Chr5	12822200	12822300
Chr1	23389700	23389800	Chr1	15206400	15206500	Chr5	11187000	11187100	Chr1	15192700	15192800				Chr3	11586200	11586300				Chr5	12822500	12822600
Chr1	23389800	23389900	Chr1	15237400	15237500	Chr5	11187100	11187200	Chr1	15194400	15194500				Chr3	11959100	11959200				Chr5	12824200	12824300
Chr1	23389900	23390000	Chr1	15239600	15239700	Chr5	11187200	11187300	Chr1	15204500	15204600				Chr3	11959200	11959300				Chr5	12824900	12825000
Chr1	23390200	23390300	Chr1	15246000	15246100	Chr5	11187300	11187400	Chr1	15204600	15204700				Chr3	12422900	12423000				Chr5	12826000	12826100
Chr1	23413400	23413500	Chr1	15248600	15248700	Chr5	11187400	11187500	Chr1	15207400	15207500				Chr3	12530100	12530200				Chr5	12826500	12826600
Chr1	23413500	23413600	Chr1	15250800	15250900	Chr5	11187500	11187600	Chr1	15207500	15207600				Chr3	12530300	12530400				Chr5	12851300	12851400
Chr1	23414100	23414200	Chr1	15253000	15253100	Chr5	11187600	11187700	Chr1	15212000	15212100				Chr3	12573300	12573400				Chr5	12853200	12853300
Chr1	23420300	23420400	Chr1	15254000	15254100	Chr5	11187700	11187800	Chr1	15213100	15213200				Chr3	13434100	13434200				Chr5	12853500	12853600
Chr1	23453900	23454000	Chr1	15257600	15257700	Chr5	11187800	11187900	Chr1	15225200	15225300				Chr3	13480700	13480800				Chr5	12854200	12854300
Chr1	23454000	23454100	Chr1	15259800	15259900	Chr5	11187900	11188000	Chr1	15226200	15226300				Chr3	13480800	13480900				Chr5	12858500	12858600
Chr1	23454100	23454200	Chr1	15262000	15262100	Chr5	11188000	11188100	Chr1	15227400	15227500				Chr3	13536500	13536600				Chr5	12858900	12859000
Chr1	23454200	23454300	Chr1	15263600	15263700	Chr5	11188100	11188200	Chr1	15227500	15227600				Chr3	13536600	13536700				Chr5	12859000	12859100
Chr1	23454300	23454400	Chr1	15270500	15270600	Chr5	11188200	11188300	Chr1	15228200	15228300				Chr3	13537600	13537700				Chr5	12859700	12859800
Chr1	23454400	23454500	Chr1	15277900	15278000	Chr5	11188300	11188400	Chr1	15230400	15230500				Chr3	13537800	13537900				Chr5	12860000	12860100
Chr1	23454500	23454600	Chr1	15292500	15292600	Chr5	11188400	11188500	Chr1	15232600	15232700				Chr3	13540500	13540600				Chr5	12860500	12860600
Chr1	23454600	23454700	Chr1	15292600	15292700	Chr5	11188500	11188600	Chr1	15233800	15233900				Chr3	13541600	13541700				Chr5	12860900	12861000
Chr1	23454700	23454800	Chr1	15296700	15296800	Chr5	11188600	11188700	Chr1	15233900	15234000				Chr3	13595100	13595200				Chr5	12861000	12861100
Chr1	23454800	23454900	Chr1	15308900	15309000	Chr5	11188700	11188800	Chr1	15234700	15234800				Chr3	13595200	13595300				Chr5	12862500	12862600
Chr1	23454900	23455000	Chr1	15309700	15309800	Chr5	11188800	11188900	Chr1	15236800	15236900				Chr3	13596700	13596800				Chr5	12862900	12863000
Chr1	23587100	23587200	Chr1	15336700	15336800	Chr5	11188900	11189000	Chr1	15239000	15239100				Chr3	13598200	13598300				Chr5	12863000	12863100
Chr1	23587200	23587300	Chr1	15343100	15343200	Chr5	11324300	11324400	Chr1	15240400	15240500				Chr3	13600100	13600200				Chr5	12863700	12863800
Chr1	23587800	23587900	Chr1	15345700	15345800	Chr5	11355400	11355500	Chr1	15240700	15240800				Chr3	13684400	13684500				Chr5	12864900	12865000
Chr1	23723600	23723700	Chr1	15348900	15349000	Chr5	11683000	11683100	Chr1	15240800	15240900				Chr3	13684900	13685000				Chr5	12865200	12865300
Chr1	23876500	23876600	Chr1	15351100	15351200	Chr5	11689800	11689900	Chr1	15241200	15241300				Chr3	13685800	13685900				Chr5	12868700	12868800
Chr1	23880600	23880700	Chr1	15352100	15352200	Chr5	11701700	11701800	Chr1	15244000	15244100				Chr3	13697100	13697200				Chr5	12869200	12869300
Chr1	23880700	23880800	Chr1	15355700	15355800	Chr5	11701800	11701900	Chr1	15244100	15244200				Chr3	13698100	13698200				Chr5	12954100	12954200
Chr1	23880800	23880900	Chr1	15357900	15358000	Chr5	11701900	11702000	Chr1	15246700	15246800				Chr3	13698700	13698800				Chr5	13369900	13370000
Chr1	23884700	23884800	Chr1	15360100	15360200	Chr5	11702600	11702700	Chr1	15247100	15247200				Chr3	13699200	13699300				Chr5	13611800	13611900
Chr1	23884800	23884900	Chr1	15361700	15361800	Chr5	11702700	11702800	Chr1	15247500	15247600				Chr3	13699300	13699400				Chr5	13831400	13831500
Chr1	23884900	23885000	Chr1	15368600	15368700	Chr5	11703100	11703200	Chr1	15249400	15249500				Chr3	13700200	13700300				Chr5	14253600	14253700
Chr1	23885000	23885100	Chr1	15376000	15376100	Chr5	11704000	11704100	Chr1	15252300	15252400				Chr3	13700800	13700900				Chr5	14295000	14295100
Chr1	23885100	23885200	Chr1	15390700	15390800	Chr5	11704100	11704200	Chr1	15252400	15252500				Chr3	13702100	13702200				Chr5	14295100	14295200
Chr1	23885200	23885300	Chr1	15394800	15394900	Chr5	11704200	11704300	Chr1	15254000	15254100				Chr3	13702200	13702300				Chr5	14857800	14857900
Chr1	24126100	24126200	Chr1	15407000	15407100	Chr5	11704500	11704600	Chr1	15254100	15254200				Chr3	13702600	13702700				Chr5	14857900	14858000
Chr1	24317400	24317500	Chr1	15407800	15407900	Chr5	11704600	11704700	Chr1	15259200	15259300				Chr3	13703100	13703200				Chr5	15032500	15032600
Chr1	24350800	24350900	Chr1	15408000	15408100	Chr5	11704900	11705000	Chr1	15263600	15263700				Chr3	13703600	13703700				Chr5	15225300	15225400
Chr1	24360200	24360300	Chr1	15414900	15415000	Chr5	11705100	11705200	Chr1	15265800	15265900				Chr3	13704900	13705000				Chr5	15377400	15377500
Chr1	24360300	24360400	Chr1	15416100	15416200	Chr5	11705800	11705900	Chr1	15271300	15271400				Chr3	13705400	13705500				Chr5	15377500	15377600
Chr1	24360400	24360500	Chr1	15417700	15417800	Chr5	11706000	11706100	Chr1	15275600	15275700				Chr3	13705900	13706000				Chr5	15377600	15377700
Chr1	24360500	24360600	Chr1	15417800	15417900	Chr5	11706500	11706600	Chr1	15280000	15280100				Chr3	13706900	13707000				Chr5	15377700	15377800
Chr1	24360600	24360700	Chr1	15418200	15418300	Chr5	11706700	11706800	Chr1	15292500	15292600				Chr3	13707900	13708000				Chr5	15377900	15378000
Chr1	24369400	24369500	Chr1	15419300	15419400	Chr5	11707400	11707500	Chr1	15292600	15292700				Chr3	13708000	13708100				Chr5	15378000	15378100
Chr1	24425800	24425900	Chr1	15422500	15422600	Chr5	11707500	11707600	Chr1	15298300	15298400				Chr3	13708400	13708500				Chr5	15378100	15378200
Chr1	24425900	24426000	Chr1	15422700	15422800	Chr5	11707600	11707700	Chr1	15309700	15309800				Chr3	13709400	13709500				Chr5	15378200	15378300
Chr1	24426000	24426100	Chr1	15423200	15423300	Chr5	11707900	11708000	Chr1	15310000	15310100				Chr3	13710400	13710500				Chr5	15381200	15381300
Chr1	24426100	24426200	Chr1	15423300	15423400	Chr5	11708100	11708200	Chr1	15318100	15318200				Chr3	13711500	13711600				Chr5	15381300	15381400
Chr1	24426500	24426600	Chr1	15426800	15426900	Chr5	11708300	11708400	Chr1	15323700	15323800				Chr3	13711900	13712000				Chr5	15381500	15381600
Chr1	24426600	24426700	Chr1	15432200	15432300	Chr5	11708600	11708700	Chr1	15323800	15323900				Chr3	13712000	13712100				Chr5	15381600	15381700
Chr1	24482100	24482200	Chr1	15432400	15432500	Chr5	11708800	11708900	Chr1	15324500	15324600				Chr3	13712400	13712500				Chr5	15381800	15381900
Chr1	24482200	24482300	Chr1	15432800	15432900	Chr5	11709000	11709100	Chr1	15324600	15324700				Chr3	13712500	13712600				Chr5	15384400	15384500
Chr1	24482300	24482400	Chr1	15437100	15437200	Chr5	11709500	11709600	Chr1	15326200	15326300				Chr3	13712900	13713000				Chr5	15384500	15384600
Chr1	24482400	24482500	Chr1	15445300	15445400	Chr5	11709700	11709800	Chr1	15327500	15327600				Chr3	13713000	13713100				Chr5	15384800	15384900
Chr1	24482500	24482600	Chr1	15445400	15445500	Chr5	11710200	11710300	Chr1	15329700	15329800				Chr3	13715000	13715100				Chr5	15827000	15827100
Chr1	24482900	24483000	Chr1	15445500	15445600	Chr5	11710300	11710400	Chr1	15330900	15331000				Chr3	13715500	13715600				Chr5	15891600	15891700
Chr1	24483000	24483100	Chr1	15445600	15445700	Chr5	11710500	11710600	Chr1	15331800	15331900				Chr3	13716500	13716600				Chr5	15891800	15891900
Chr1	24483100	24483200	Chr1	15445800	15445900	Chr5	11710700	11710800	Chr1	15333900	15334000				Chr3	13717500	13717600				Chr5	15976200	15976300
Chr1	24532100	24532200	Chr1	15445900	15446000	Chr5	11711100	11711200	Chr1	15336100	15336200				Chr3	13718000	13718100				Chr5	15976300	15976400
Chr1	24593600	24593700	Chr1	15446200	15446300	Chr5	11711300	11711400	Chr1	15337500	15337600				Chr3	13718500	13718600				Chr5	16166200	16166300
Chr1	24623300	24623400	Chr1	15446400	15446500	Chr5	11711800	11711900	Chr1	15337800	15337900				Chr3	13719500	13719600				Chr5	16410600	16410700
Chr1	24624000	24624100	Chr1	15446500	15446600	Chr5	11723400	11723500	Chr1	15337900	15338000				Chr3	13720000	13720100				Chr5	16660400	16660500
Chr1	24624100	24624200	Chr1	15447400	15447500	Chr5	11723600	11723700	Chr1	15338300	15338400				Chr3	13724100	13724200				Chr5	16660500	16660600
Chr1	24624200	24624300	Chr1	15448300	15448400	Chr5	11723800	11723900	Chr1	15338400	15338500				Chr3	13725900	13726000				Chr5	16677100	16677200
Chr1	24705000	24705100	Chr1	15448600	15448700	Chr5	11724200	11724300	Chr1	15341200	15341300				Chr3	13747600	13747700				Chr5	16716200	16716300
Chr1	24714600	24714700	Chr1	15448700	15448800	Chr5	11724300	11724400	Chr1	15344300	15344400				Chr3	13750600	13750700				Chr5	16716400	16716500
Chr1	24714700	24714800	Chr1	15450600	15450700	Chr5	11724500	11724600	Chr1	15344600	15344700				Chr3	13750700	13750800				Chr5	16716500	16716600
Chr1	24714800	24714900	Chr1	15450700	15450800	Chr5	11724900	11725000	Chr1	15347000	15347100				Chr3	13751100	13751200				Chr5	16716600	16716700
Chr1	24718900	24719000	Chr1	15450800	15450900	Chr5	11726100	11726200	Chr1	15347800	15347900				Chr3	13751600	13751700				Chr5	16716700	16716800
Chr1	24721100	24721200	Chr1	15451600	15451700	Chr5	11726300	11726400	Chr1	15350400	15350500				Chr3	13751700	13751800				Chr5	16716800	16716900
Chr1	24721200	24721300	Chr1	15452000	15452100	Chr5	11726500	11726600	Chr1	15350500	15350600				Chr3	13753000	13753100				Chr5	16716900	16717000
Chr1	24721300	24721400	Chr1	15452800	15452900	Chr5	11727000	11727100	Chr1	15352100	15352200				Chr3	13754400	13754500				Chr5	16775500	16775600
Chr1	24721400	24721500	Chr1	15452900	15453000	Chr5	11727200	11727300	Chr1	15352200	15352300				Chr3	13754500	13754600				Chr5	17230100	17230200
Chr1	24772900	24773000	Chr1	15453100	15453200	Chr5	11727700	11727800	Chr1	15357200	15357300				Chr3	13754900	13755000				Chr5	17360700	17360800
Chr1	24831600	24831700	Chr1	15453500	15453600	Chr5	11728000	11728100	Chr1	15357300	15357400				Chr3	13755000	13755100				Chr5	17459200	17459300
Chr1	24857400	24857500	Chr1	15453700	15453800	Chr5	11728100	11728200	Chr1	15361700	15361800				Chr3	13755900	13756000				Chr5	17516300	17516400
Chr1	24857500	24857600	Chr1	15455900	15456000	Chr5	11728200	11728300	Chr1	15363900	15364000				Chr3	13756000	13756100				Chr5	17839600	17839700
Chr1	24908400	24908500	Chr1	15456100	15456200	Chr5	11728300	11728400	Chr1	15369400	15369500				Chr3	13756500	13756600				Chr5	18358800	18358900
Chr1	24908500	24908600	Chr1	15456200	15456300	Chr5	11728600	11728700	Chr1	15373600	15373700				Chr3	13766600	13766700				Chr5	18542900	18543000
Chr1	24913200	24913300	Chr1	15456400	15456500	Chr5	11728800	11728900	Chr1	15373700	15373800				Chr3	13768600	13768700				Chr5	18543000	18543100
Chr1	24921100	24921200	Chr1	15456700	15456800	Chr5	11729000	11729100	Chr1	15378100	15378200				Chr3	13769100	13769200				Chr5	18558800	18558900
Chr1	24948200	24948300	Chr1	15456800	15456900	Chr5	11729700	11729800	Chr1	15390700	15390800				Chr3	13769700	13769800				Chr5	18698600	18698700
Chr1	25097900	25098000	Chr1	15460700	15460800	Chr5	11729900	11730000	Chr1	15396400	15396500				Chr3	13770200	13770300				Chr5	18698700	18698800
Chr1	25098000	25098100	Chr1	15461100	15461200	Chr5	11730700	11730800	Chr1	15408000	15408100				Chr3	13770700	13770800				Chr5	18787400	18787500
Chr1	25261100	25261200	Chr1	15461200	15461300	Chr5	11731200	11731300	Chr1	15408100	15408200				Chr3	13770800	13770900				Chr5	18790300	18790400
Chr1	25261200	25261300	Chr1	15461500	15461600	Chr5	11731300	11731400	Chr1	15419300	15419400				Chr3	13771200	13771300				Chr5	18907500	18907600
Chr1	25261300	25261400	Chr1	15461600	15461700	Chr5	11731400	11731500	Chr1	15422500	15422600				Chr3	13773200	13773300				Chr5	19009100	19009200
Chr1	25279000	25279100	Chr1	15462000	15462100	Chr5	11731500	11731600	Chr1	15422700	15422800				Chr3	13774300	13774400				Chr5	19744200	19744300
Chr1	25279100	25279200	Chr1	15462100	15462200	Chr5	11731600	11731700	Chr1	15422800	15422900				Chr3	13775700	13775800				Chr5	19885600	19885700
Chr1	25349200	25349300	Chr1	15462800	15462900	Chr5	11732000	11732100	Chr1	15422900	15423000				Chr3	13777700	13777800				Chr5	19885700	19885800
Chr1	25349300	25349400	Chr1	15462900	15463000	Chr5	11732300	11732400	Chr1	15432200	15432300				Chr3	13778300	13778400				Chr5	20046800	20046900
Chr1	25349400	25349500	Chr1	15463400	15463500	Chr5	11732700	11732800	Chr1	15432400	15432500				Chr3	13778700	13778800				Chr5	20464500	20464600
Chr1	25349500	25349600	Chr1	15463700	15463800	Chr5	11733200	11733300	Chr1	15432500	15432600				Chr3	13778800	13778900				Chr5	20675200	20675300
Chr1	25349600	25349700	Chr1	15467700	15467800	Chr5	11733700	11733800	Chr1	15437100	15437200				Chr3	13779200	13779300				Chr5	20741600	20741700
Chr1	25357800	25357900	Chr1	15468100	15468200	Chr5	11733800	11733900	Chr1	15445400	15445500				Chr3	13779300	13779400				Chr5	20741700	20741800
Chr1	25401400	25401500	Chr1	15468200	15468300	Chr5	11733900	11734000	Chr1	15445600	15445700				Chr3	13780200	13780300				Chr5	20756300	20756400
Chr1	25452800	25452900	Chr1	15468500	15468600	Chr5	11734700	11734800	Chr1	15445900	15446000				Chr3	13790600	13790700				Chr5	20795900	20796000
Chr1	25452900	25453000	Chr1	15468900	15469000	Chr5	11734800	11734900	Chr1	15446100	15446200				Chr3	13796600	13796700				Chr5	20996700	20996800
Chr1	25453000	25453100	Chr1	15469000	15469100	Chr5	11736000	11736100	Chr1	15446200	15446300				Chr3	13798000	13798100				Chr5	20996800	20996900
Chr1	25536600	25536700	Chr1	15469800	15469900	Chr5	11736100	11736200	Chr1	15446500	15446600				Chr3	13798100	13798200				Chr5	21161500	21161600
Chr1	25536700	25536800	Chr1	15470300	15470400	Chr5	11736200	11736300	Chr1	15447700	15447800				Chr3	13798500	13798600				Chr5	21257800	21257900
Chr1	25609900	25610000	Chr1	15470600	15470700	Chr5	11737300	11737400	Chr1	15451600	15451700				Chr3	13798600	13798700				Chr5	21295700	21295800
Chr1	25641700	25641800	Chr1	15475000	15475100	Chr5	11768100	11768200	Chr1	15451900	15452000				Chr3	13800600	13800700				Chr5	21300800	21300900
Chr1	25660100	25660200	Chr1	15475400	15475500	Chr5	11769300	11769400	Chr1	15452800	15452900				Chr3	13800700	13800800				Chr5	21300900	21301000
Chr1	25660200	25660300	Chr1	15475900	15476000	Chr5	11814000	11814100	Chr1	15452900	15453000				Chr3	13809600	13809700				Chr5	21401100	21401200
Chr1	25829700	25829800	Chr1	15476200	15476300	Chr5	11838300	11838400	Chr1	15453100	15453200				Chr3	13810100	13810200				Chr5	21707300	21707400
Chr1	25928700	25928800	Chr1	15476700	15476800	Chr5	11847900	11848000	Chr1	15455500	15455600				Chr3	13810900	13811000				Chr5	21723100	21723200
Chr1	25928800	25928900	Chr1	15477200	15477300	Chr5	11848200	11848300	Chr1	15456600	15456700				Chr3	13811900	13812000				Chr5	21811700	21811800
Chr1	25932100	25932200	Chr1	15477300	15477400	Chr5	11873300	11873400	Chr1	15456700	15456800				Chr3	13812000	13812100				Chr5	21811800	21811900
Chr1	25989700	25989800	Chr1	15477500	15477600	Chr5	11942900	11943000	Chr1	15462000	15462100				Chr3	13813000	13813100				Chr5	21811900	21812000
Chr1	25989800	25989900	Chr1	15477600	15477700	Chr5	11975700	11975800	Chr1	15462500	15462600				Chr3	13813400	13813500				Chr5	21814100	21814200
Chr1	26031900	26032000	Chr1	15481800	15481900	Chr5	12014800	12014900	Chr1	15462600	15462700				Chr3	13813500	13813600				Chr5	21814200	21814300
Chr1	26032000	26032100	Chr1	15482000	15482100	Chr5	12027200	12027300	Chr1	15463300	15463400				Chr3	13813900	13814000				Chr5	21888300	21888400
Chr1	26170100	26170200	Chr1	15482100	15482200	Chr5	12053900	12054000	Chr1	15463400	15463500				Chr3	13814000	13814100				Chr5	21888400	21888500
Chr1	26170400	26170500	Chr1	15482400	15482500	Chr5	12055300	12055400	Chr1	15463600	15463700				Chr3	13814500	13814600				Chr5	21888500	21888600
Chr1	26170500	26170600	Chr1	15482800	15482900	Chr5	12055400	12055500	Chr1	15463800	15463900				Chr3	13815000	13815100				Chr5	21945300	21945400
Chr1	26336000	26336100	Chr1	15482900	15483000	Chr5	12056800	12056900	Chr1	15468900	15469000				Chr3	13815500	13815600				Chr5	21945400	21945500
Chr1	26344200	26344300	Chr1	15483700	15483800	Chr5	12074400	12074500	Chr1	15469000	15469100				Chr3	13816000	13816100				Chr5	21945500	21945600
Chr1	26382100	26382200	Chr1	15483800	15483900	Chr5	12091500	12091600	Chr1	15469400	15469500				Chr3	13835100	13835200				Chr5	21990600	21990700
Chr1	26510700	26510800	Chr1	15484200	15484300	Chr5	12091600	12091700	Chr1	15469600	15469700				Chr3	13835200	13835300				Chr5	21990700	21990800
Chr1	26510800	26510900	Chr1	15487000	15487100	Chr5	12103000	12103100	Chr1	15470300	15470400				Chr3	13835600	13835700				Chr5	21990800	21990900
Chr1	26551500	26551600	Chr1	15487800	15487900	Chr5	12132200	12132300	Chr1	15470700	15470800				Chr3	13835700	13835800				Chr5	22038600	22038700
Chr1	26638000	26638100	Chr1	15487900	15488000	Chr5	12132300	12132400	Chr1	15470800	15470900				Chr3	13836200	13836300				Chr5	22038700	22038800
Chr1	26638100	26638200	Chr1	15488300	15488400	Chr5	12143000	12143100	Chr1	15475900	15476000				Chr3	13836600	13836700				Chr5	22039200	22039300
Chr1	26650800	26650900	Chr1	15492200	15492300	Chr5	12143100	12143200	Chr1	15476300	15476400				Chr3	13836700	13836800				Chr5	22074400	22074500
Chr1	26722300	26722400	Chr1	15492300	15492400	Chr5	12503000	12503100	Chr1	15476400	15476500				Chr3	13837700	13837800				Chr5	22076800	22076900
Chr1	26772900	26773000	Chr1	15493100	15493200	Chr5	12503200	12503300	Chr1	15476500	15476600				Chr3	13837800	13837900				Chr5	22246600	22246700
Chr1	26773600	26773700	Chr1	15493200	15493300	Chr5	12538100	12538200	Chr1	15476800	15476900				Chr3	13838700	13838800				Chr5	22246700	22246800
Chr1	26773700	26773800	Chr1	15493300	15493400	Chr5	12566600	12566700	Chr1	15477200	15477300				Chr3	13839200	13839300				Chr5	22246800	22246900
Chr1	26780500	26780600	Chr1	15494100	15494200	Chr5	12566700	12566800	Chr1	15477400	15477500				Chr3	13839700	13839800				Chr5	22246900	22247000
Chr1	26780600	26780700	Chr1	15494300	15494400	Chr5	12583500	12583600	Chr1	15477500	15477600				Chr3	13840200	13840300				Chr5	22247100	22247200
Chr1	26780900	26781000	Chr1	15494400	15494500	Chr5	12660300	12660400	Chr1	15477700	15477800				Chr3	13840700	13840800				Chr5	22247200	22247300
Chr1	26781000	26781100	Chr1	15494500	15494600	Chr5	12807300	12807400	Chr1	15481800	15481900				Chr3	13840800	13840900				Chr5	22247300	22247400
Chr1	26881100	26881200	Chr1	15494700	15494800	Chr5	12807500	12807600	Chr1	15483300	15483400				Chr3	13843500	13843600				Chr5	22247400	22247500
Chr1	26881400	26881500	Chr1	15495500	15495600	Chr5	12807600	12807700	Chr1	15483400	15483500				Chr3	13844100	13844200				Chr5	22247500	22247600
Chr1	27440600	27440700	Chr1	15496300	15496400	Chr5	12807700	12807800	Chr1	15483500	15483600				Chr3	13845600	13845700				Chr5	22247600	22247700
Chr1	27440700	27440800	Chr1	15500300	15500400	Chr5	12807800	12807900	Chr1	15484200	15484300				Chr3	13846000	13846100				Chr5	22247700	22247800
Chr1	27637500	27637600	Chr1	15500400	15500500	Chr5	12807900	12808000	Chr1	15484400	15484500				Chr3	13846100	13846200				Chr5	22247900	22248000
Chr1	27713300	27713400	Chr1	15501100	15501200	Chr5	12808000	12808100	Chr1	15484500	15484600				Chr3	13847100	13847200				Chr5	22287600	22287700
Chr1	27972800	27972900	Chr1	15501500	15501600	Chr5	12808100	12808200	Chr1	15484600	15484700				Chr3	13847500	13847600				Chr5	22308400	22308500
Chr1	28105500	28105600	Chr1	15502200	15502300	Chr5	12808200	12808300	Chr1	15484700	15484800				Chr3	13847600	13847700				Chr5	22308600	22308700
Chr1	28105600	28105700	Chr1	15502300	15502400	Chr5	12808300	12808400	Chr1	15487000	15487100				Chr3	13848100	13848200				Chr5	22319500	22319600
Chr1	28161200	28161300	Chr1	15502500	15502600	Chr5	12808600	12808700	Chr1	15492700	15492800				Chr3	13849100	13849200				Chr5	22322700	22322800
Chr1	28161500	28161600	Chr1	15502600	15502700	Chr5	12808700	12808800	Chr1	15493100	15493200				Chr3	13849600	13849700				Chr5	22322800	22322900
Chr1	28526900	28527000	Chr1	15502800	15502900	Chr5	12808800	12808900	Chr1	15493300	15493400				Chr3	13850600	13850700				Chr5	22338700	22338800
Chr1	28568800	28568900	Chr1	15502900	15503000	Chr5	12809300	12809400	Chr1	15498800	15498900				Chr3	13852100	13852200				Chr5	22340500	22340600
[truncated: 14,585 more rows]
